# Supplementary material
Source: PubMed Central journal article supplement (PMC7846228)
Supplement: mmc1.pdf [file mmc1.pdf]

## Supplemental information

### **Genomic monitoring of SARS-CoV-2 uncovers an Nsp1 deletion variant that modulates type I interferon response**

Jing-wen Lin, Chao Tang, Han-cheng Wei, Baowen Du, Chuan Chen, Minjin Wang, Yongzhao Zhou, Ming-xia Yu, Lu Cheng, Suvi Kuivanen, Natacha S. Ogando, Lev Levanov, Yuancun Zhao, Chang-ling Li, Ran Zhou, Zhidan Li, Yiming Zhang, Ke Sun, Chengdi Wang, Li Chen, Xia Xiao, Xiuran Zheng, Sha-sha Chen, Zhen Zhou, Ruirui Yang, Dan Zhang, Mengying Xu, Junwei Song, Danrui Wang, Yupeng Li, ShiKun Lei, Wanqin Zeng, Qingxin Yang, Ping He, Yaoyao Zhang, Lifang Zhou, Ling Cao, Feng Luo, Huayi Liu, Liping Wang, Fei Ye, Ming Zhang, Mengjiao Li, Wei Fan, Xinqiong Li, Kaiju Li, Bowen Ke, Jiannan Xu, Huiping Yang, Shusen He, Ming Pan, Yichen Yan, Yi Zha, Lingyu Jiang, Changxiu Yu, Yingfen Liu, Zhiyong Xu, Qingfeng Li, Yongmei Jiang, Jiufeng Sun, Wei Hong, Hongping Wei, Guangwen Lu, Olli Vapalahti, Yunzi Luo, Yuquan Wei, Thomas Connor, Wenjie Tan, Eric J. Snijder, Teemu Smura, Weimin Li, Jia Geng, Binwu Ying, and Lu Chen

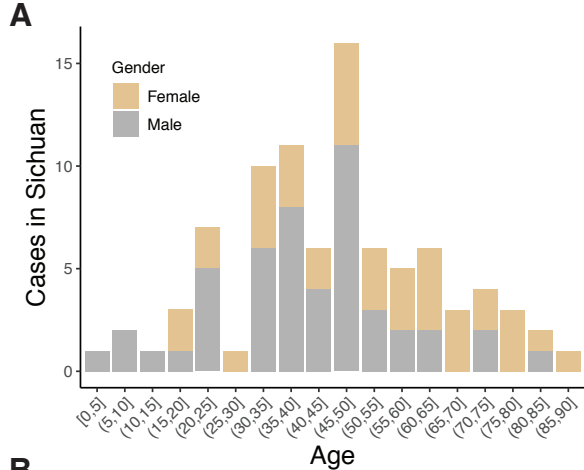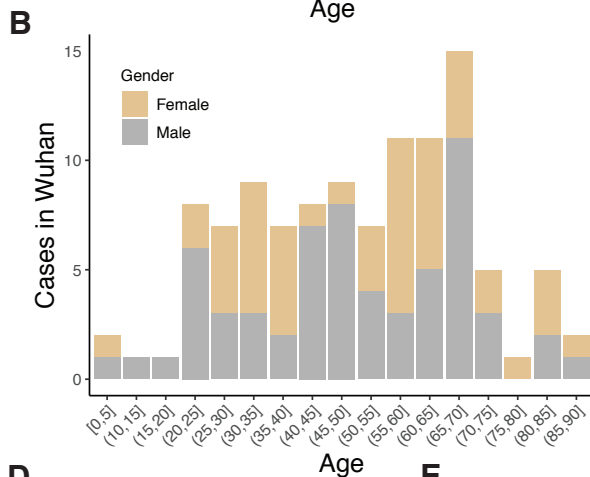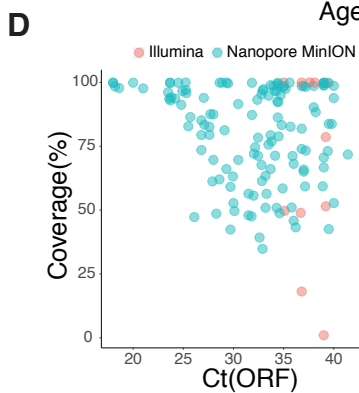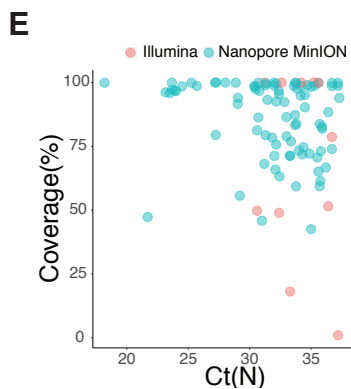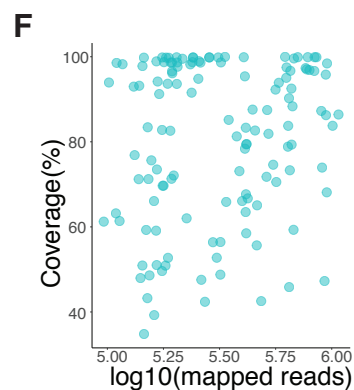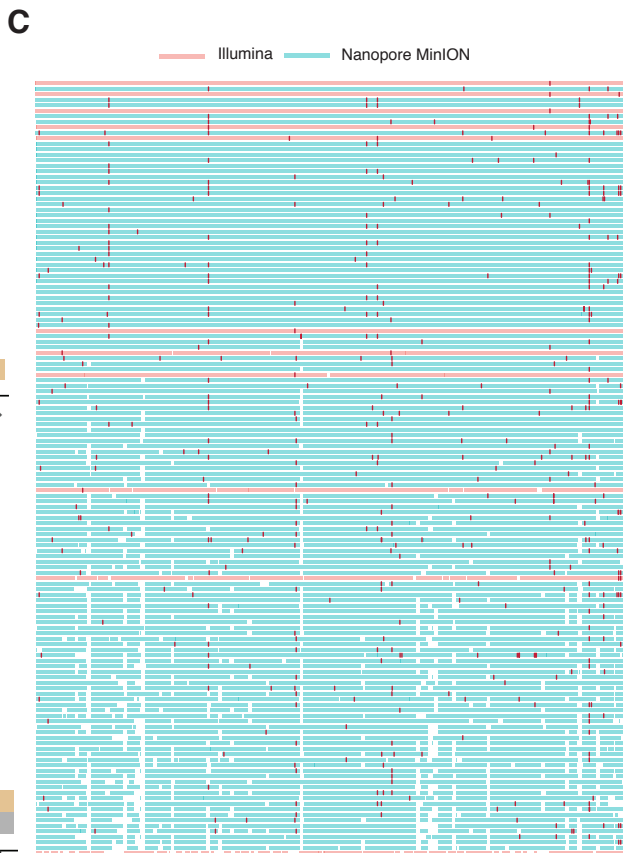

## Supplementary Figures

**Figure S1. Summary of two cohorts enrolled in this study and quality of generated genomes** (related to **Figure 1**). Age and gender distribution of the COVID-19 cases in Sichuan Province (**A**) and Wuhan (**B**), China. Cases are classified according to their gender: grey indicates male and yellow indicates female. (**C**) Genome coverage map for the 141 genomes obtained from Sichuan cohort, ordered by genome coverage. SNPs are colored in dark red. Plots of SARS-CoV-2 genome coverage against Ct values of ORF (**D**) and N gene (**E**) in qPCR tests and log-transformed number of mapped reads (**F**). Genomes are colored according to the sequencing approach: blue indicates sequencing using a Nanopore MinION device, and pink indicates sequencing using Illumina NextSeq 500 platform.

**A**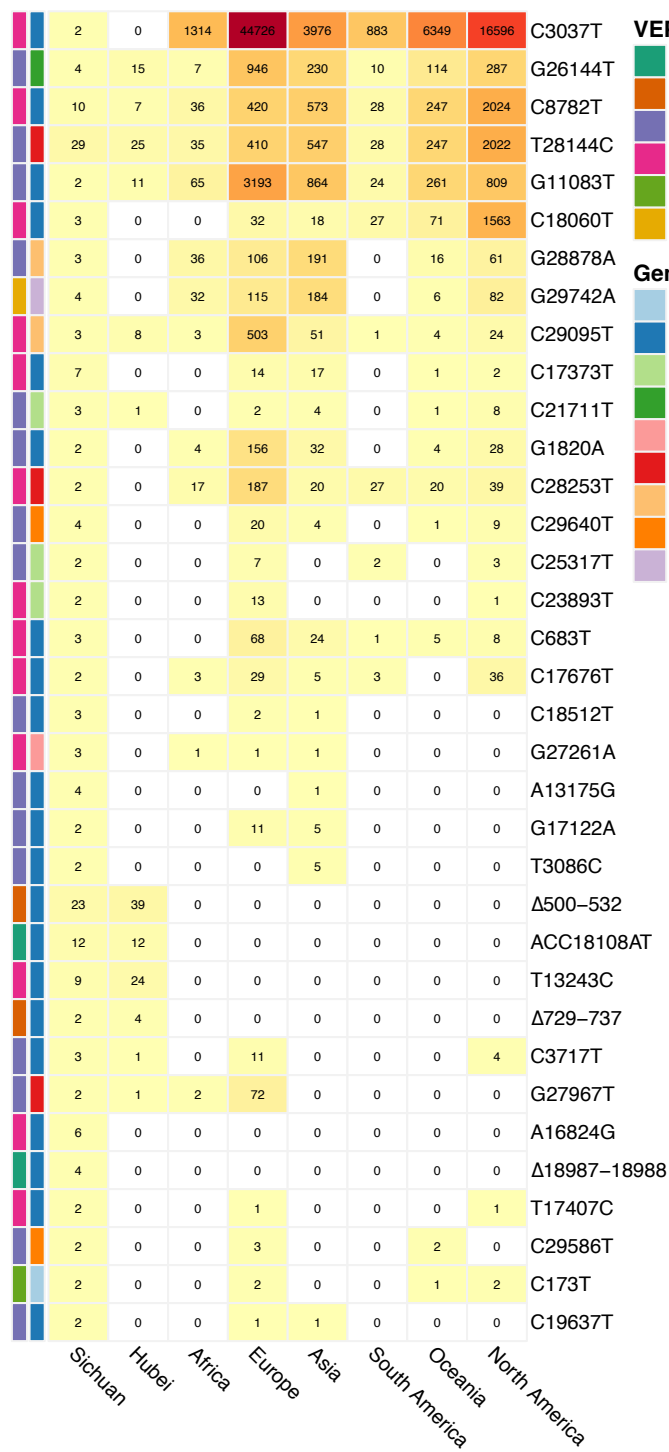**B**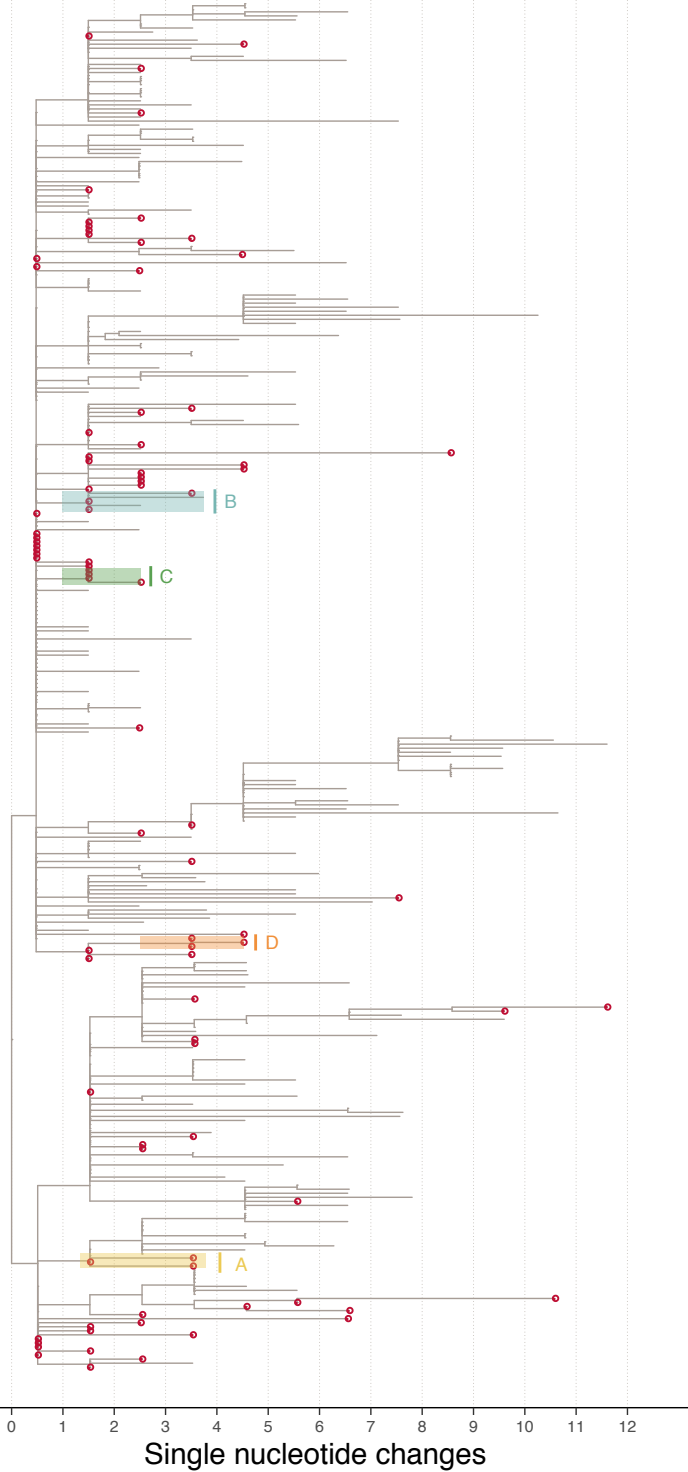**C**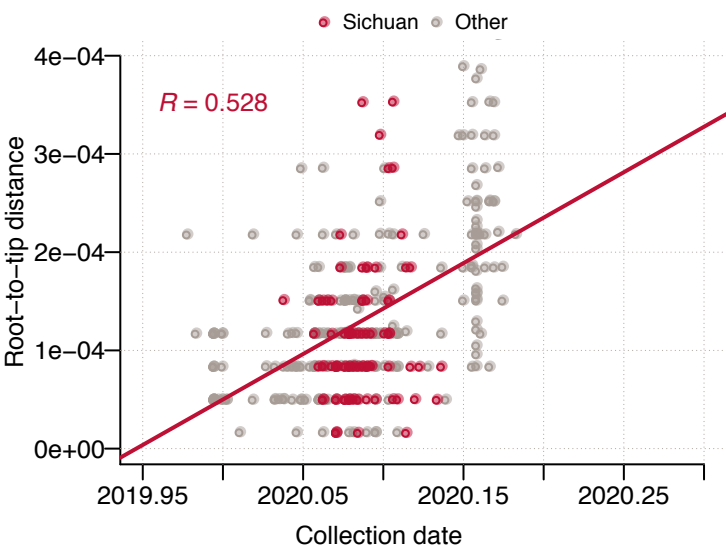**D**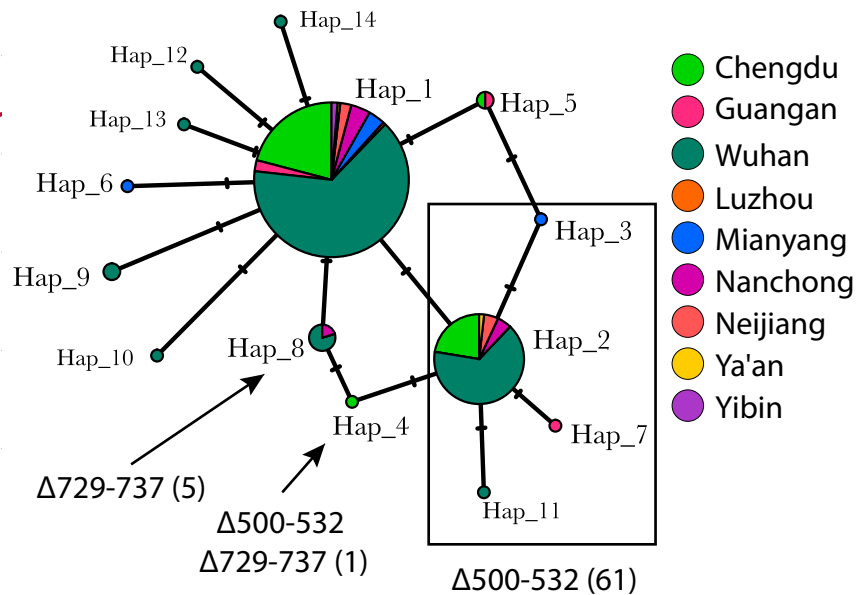

**Figure S2. Identified recurrent genetic variants, phylogenetic and haplotype analysis** (related to **Figure 2**). **(A)** Number of samples with the 35 recurrent genetic variants in China (Sichuan, Hubei, Guangdong or Hong Kong) or other countries. The effect of the variants was predicted by VEP (Variant Effect Predictor). **(B)** Estimated maximum likelihood phylogenetic tree using SARS-CoV-2 genome sequences from Sichuan (red circles), other provinces of China and other countries (grey branches). The x-axis shows the number of nucleotide changes from the inferred root sequence. The position of clusters A-D were labelled and shaded with colors. An interactive website presenting the lineage, location and country name can be accessed at <http://covid19.chenlulab.com/dist/tree.html>. **(C)** The correlation between the collection date and the root-to-tip distance in the maximum likelihood tree. Each dot represents a SARS-COV-2 genome. Red dots are virus genomes from Sichuan. The y-axis is the root-to-tip distance extracted from the phylogenetic trees generated by PhyML, with the root placed by TempEst. The x-axis is the actual sampling dates of the samples. The red line shows the association between these two and the Pearson correlation coefficient is 0.528. **(D)** The Nsp1 haplotype network of SARS-CoV-2 viruses from Wuhan and 8 cities in Sichuan. The size of dots is proportional to the number of haplotype obtained. Haplotype ID is shown above each dot and black line connecting haplotypes with a vertical line representing one mutational change. Two deletions ( $\Delta 500-532$ ,  $\Delta 729-737$ ) and their number of cases are highlighted. All haplotypes inside the rectangle contain the deletion  $\Delta 500-532$ .



**Figure S3. Validation of deletions and SNPs** (related to **Figure 2**). **(A)** Location of Nsp1 coding region in the SARS-CoV-2 genome, locations of the two deletions ( $\Delta 500-532$  and  $\Delta 729-737$ ) in Nsp1 and primers designed for PCR. Sanger sequencing confirms the two deletions  $\Delta 500-532$  **(B)** and  $\Delta 729-737$  **(C)**. Four variants, including C3717T **(D)**, A16824G **(E)**, ACC18108AT **(F)** and  $\Delta 18987-18988$  **(G)** were also validated by Sanger sequencing. **(H)** Eleven samples that were sequenced using Illumina NextSeq platform were used to cross-validate the 35 recurrent variants. The numbers indicate the counts from each sample that support the corresponding SNP or deletion, from which 26 out of the 35 variants were also identified with Illumina sequencing.

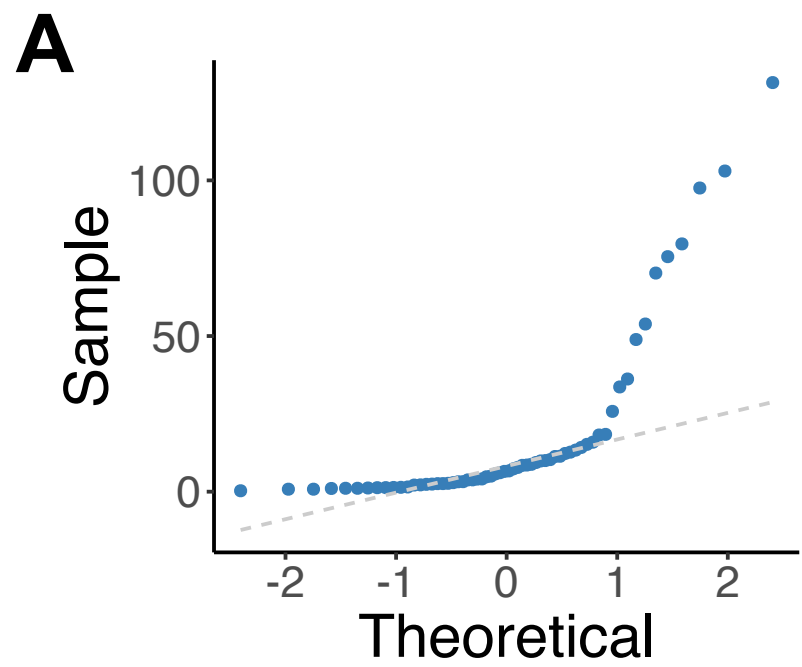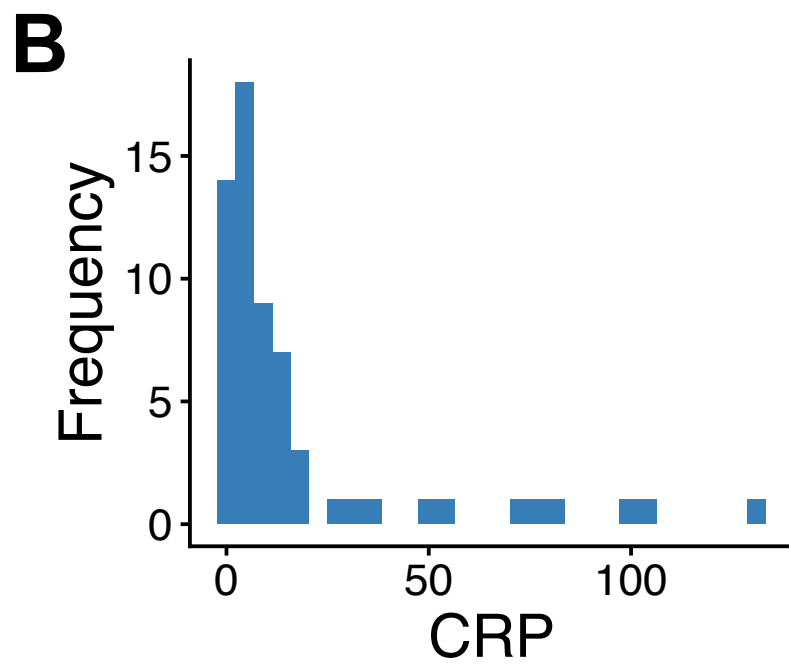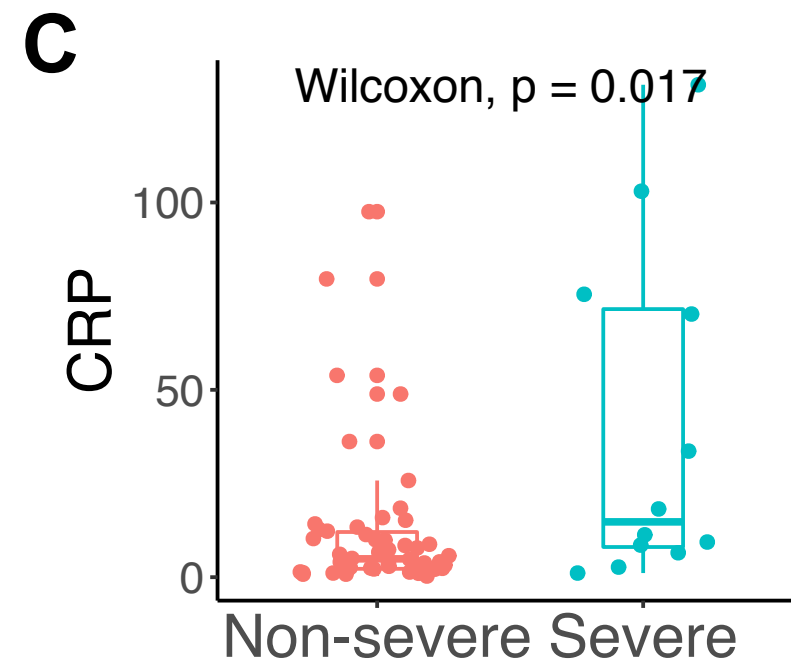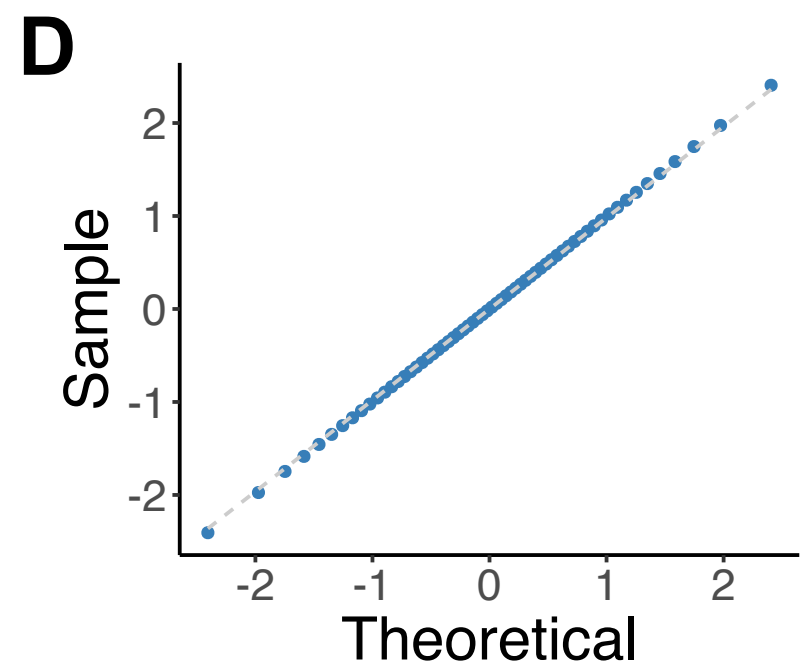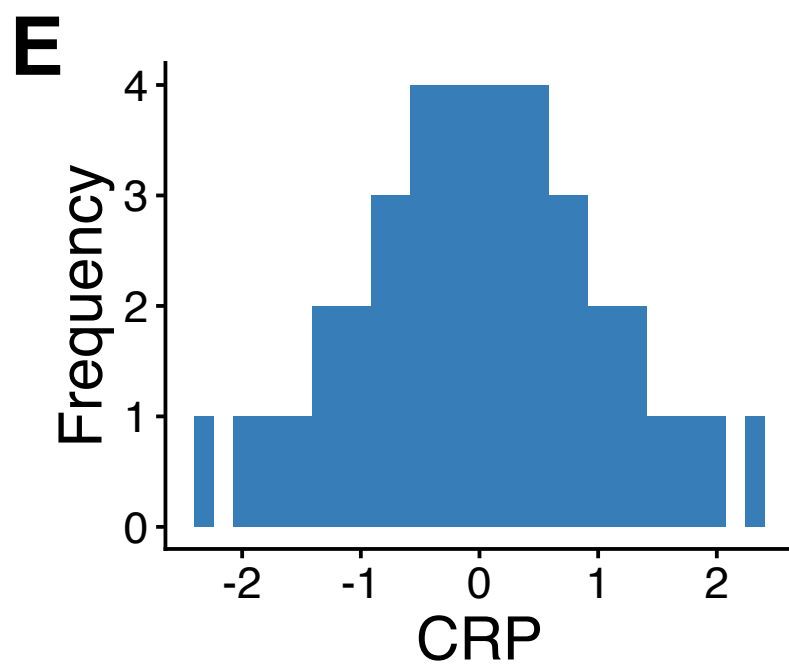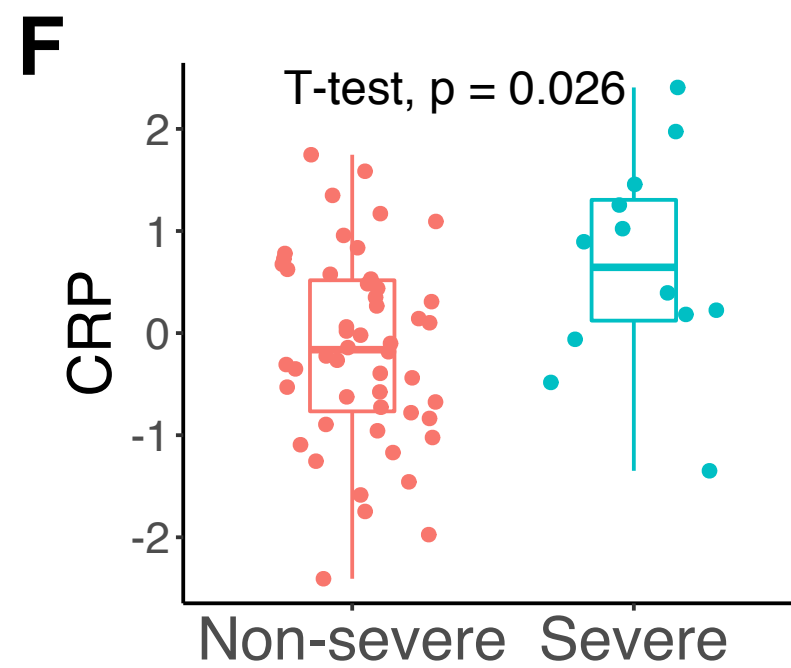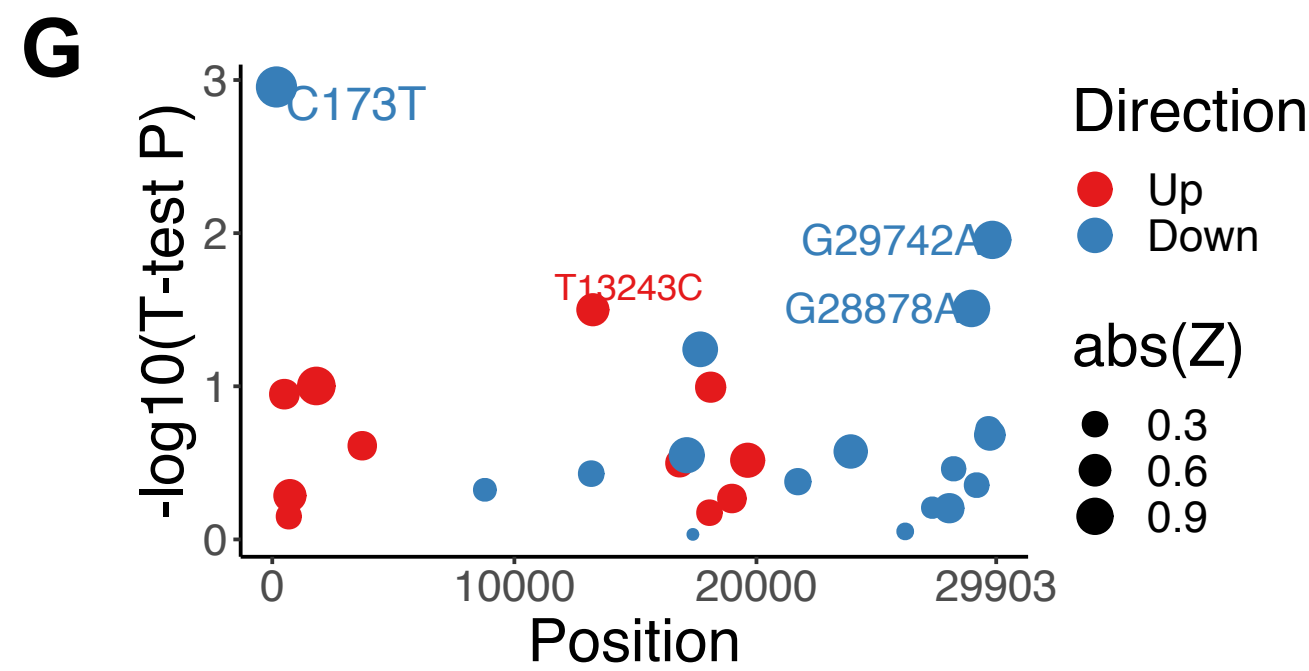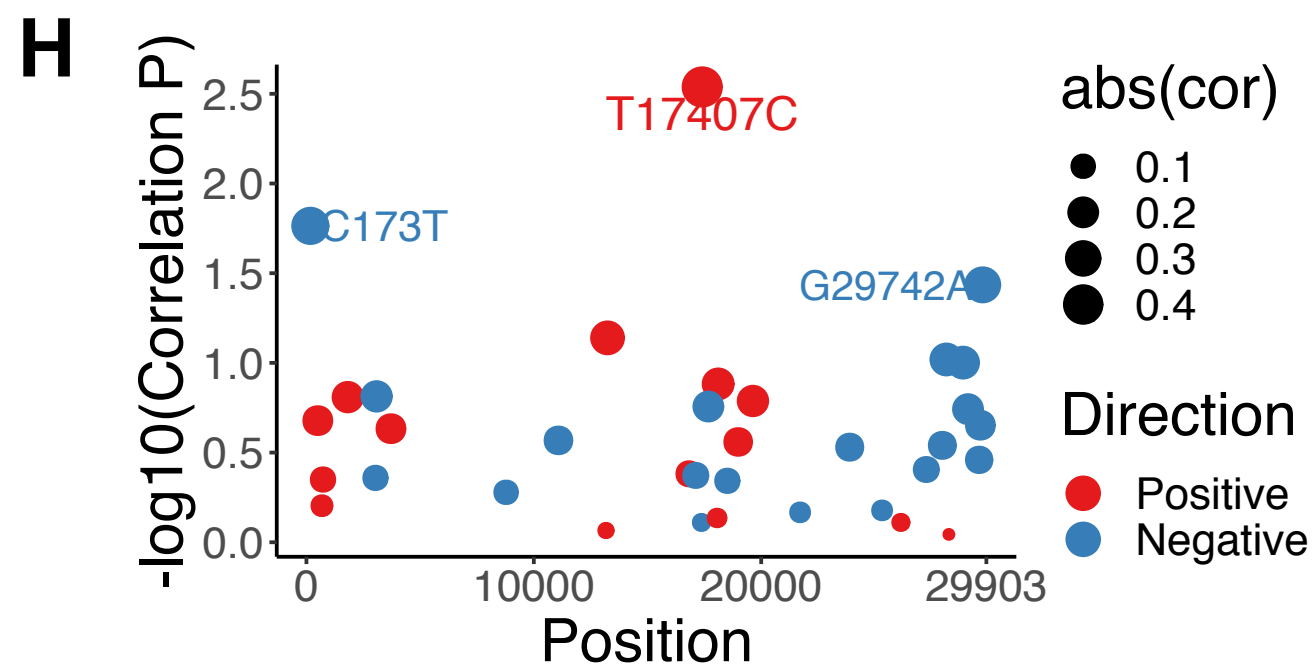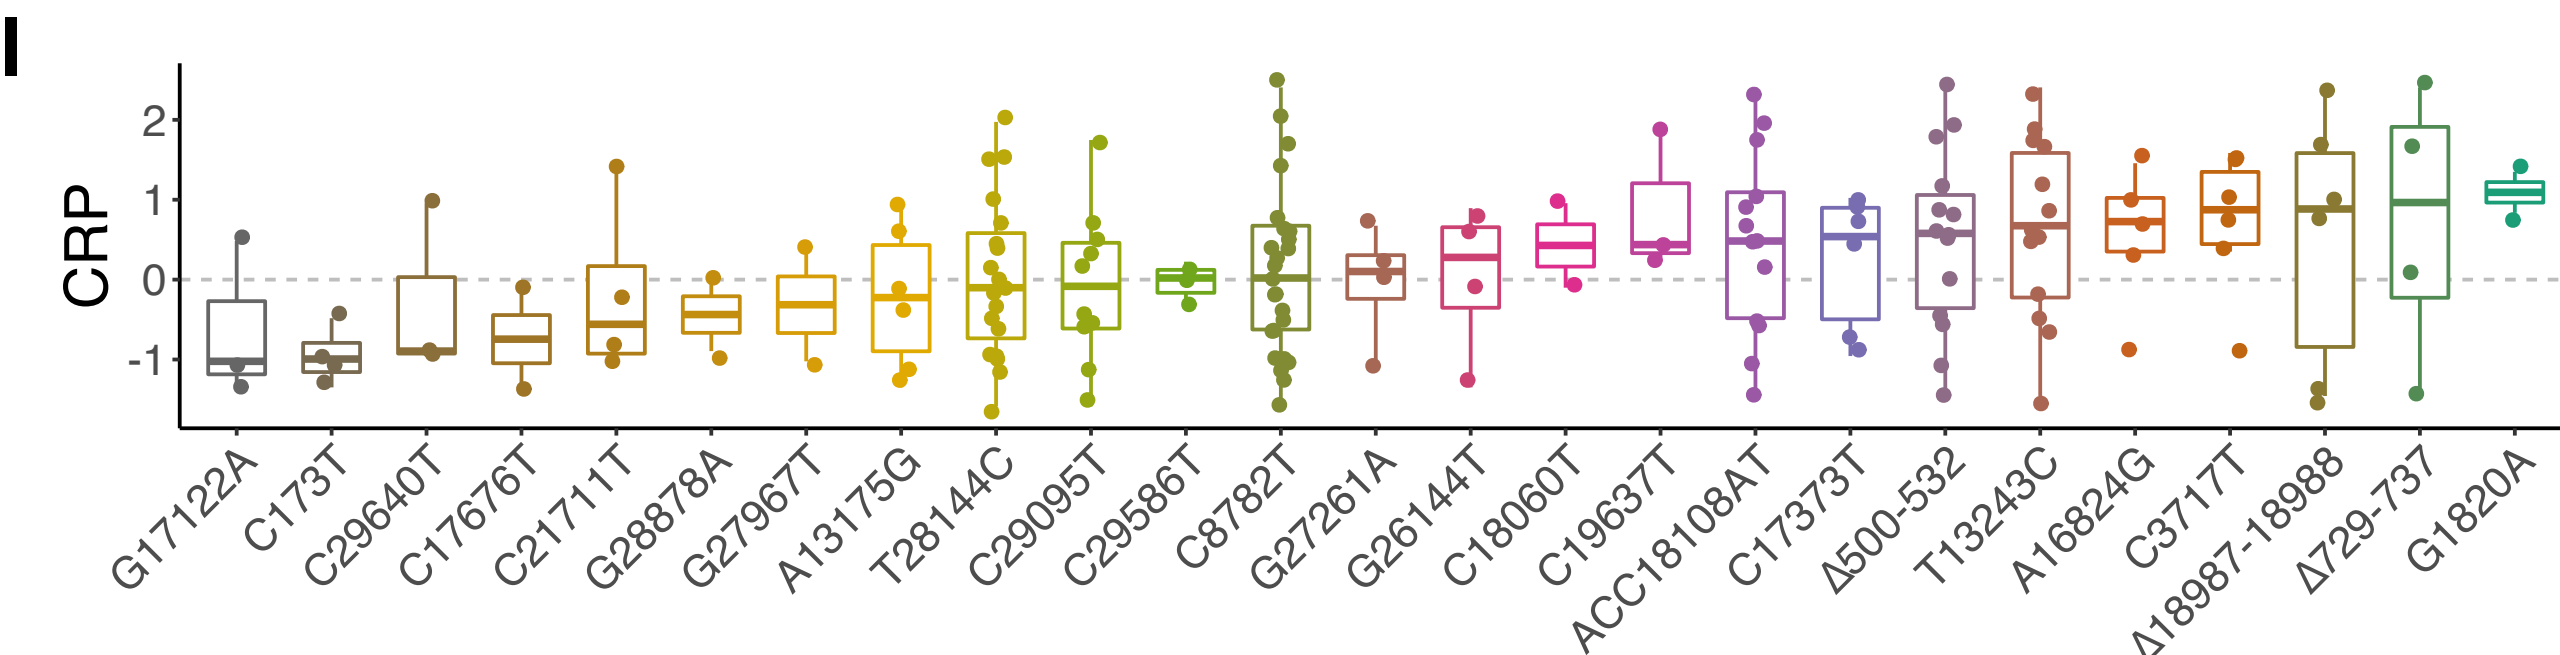



**Figure S4. Normalization and association study of C-reactive protein (CRP) with 35 genetic variants** (related to **Figure 3**). Quantile-quantile (QQ) plot and distribution plot before (**A** and **B**) and after normalization (**D** and **E**). An inverse normal transformation was used. Boxplots of CRP in non-severe and severe COVID-19 patients before (**C**) and after (**F**) normalization. P values of the Wilcoxon test or T-test were shown. (**G**) Manhattan plot of 35 genetic variants that were associated with CRP using T-test between severe and non-severe groups. Genome position and  $-\log_{10}$  of P values were shown. Variants with P value below 0.05 were labeled. Red and blue indicate higher and lower values in severe group, respectively. The size of the dots is proportional to the absolute Z score number. (**H**) Manhattan plot of 35 genetic variants that were associated with CRP using Pearson correlation. Red and blue indicate positive and negative correlation, respectively. The size of the dots represents the absolute number of correlation coefficient (cor). (**I**) Boxplot of the sorted Z score values of CRP after normalization of 35 recurrent genetic variants.

# $\Delta 500-532$

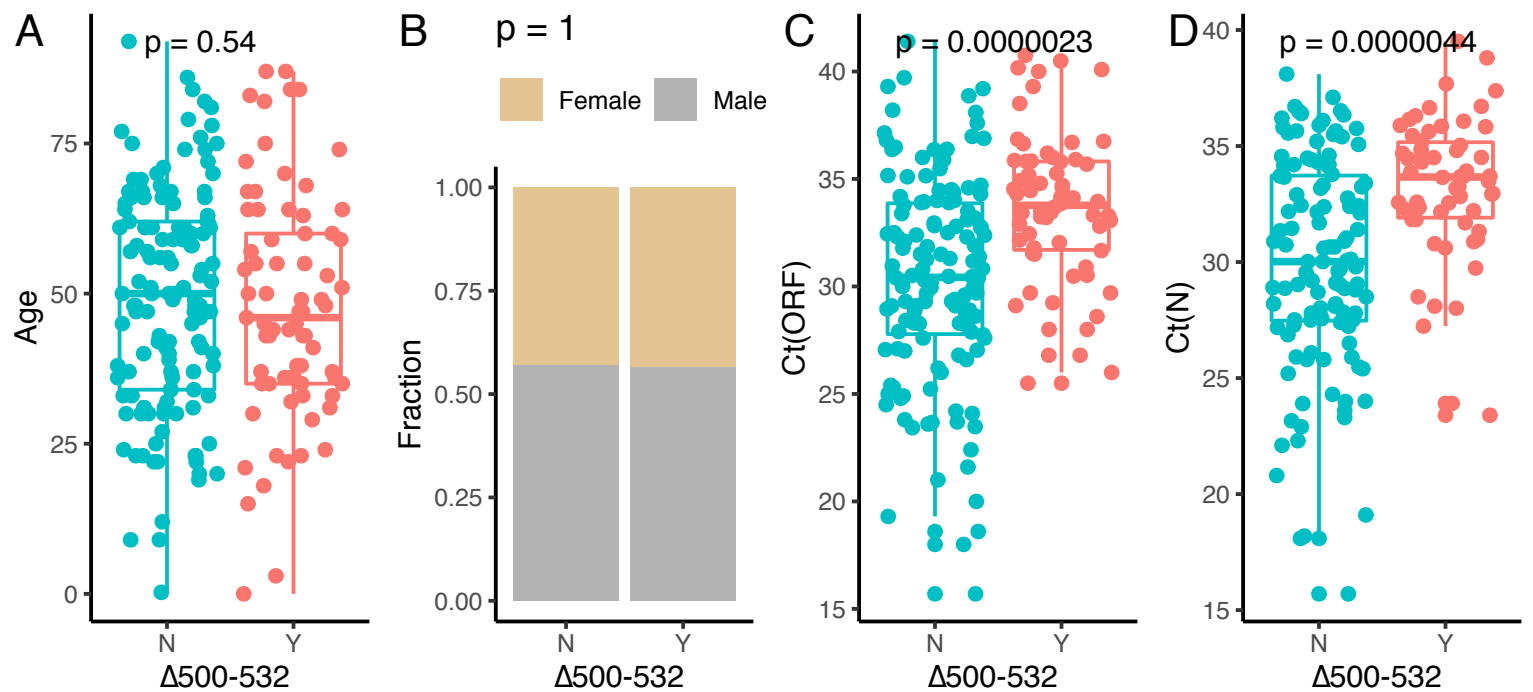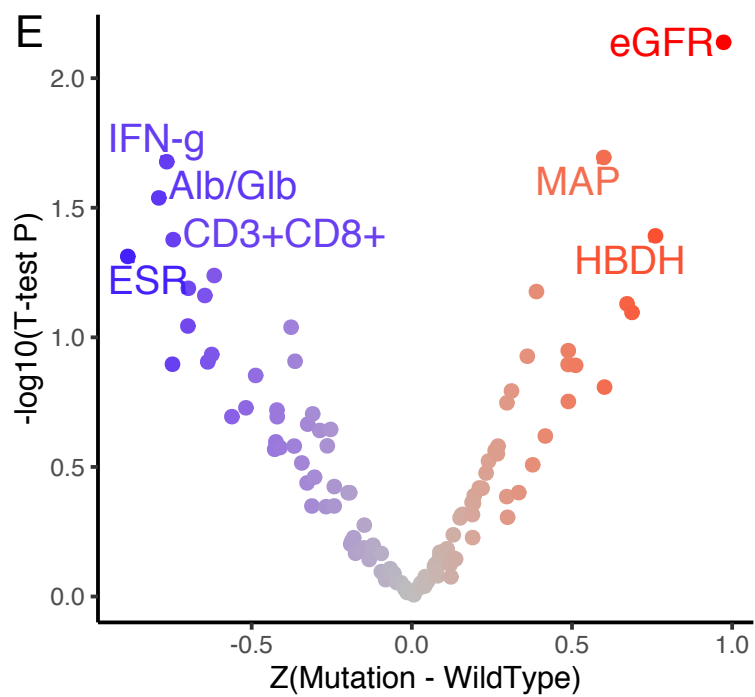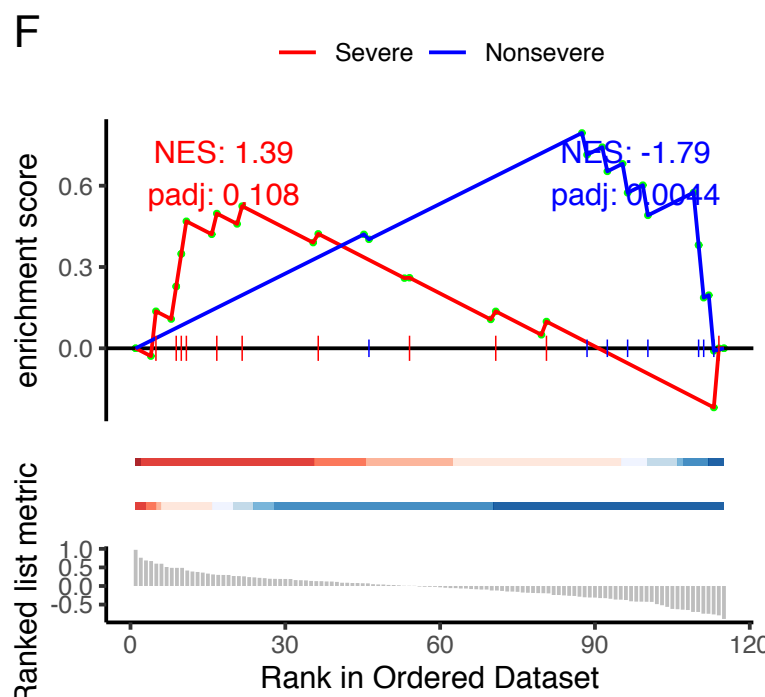

**Figure S5. Comparison between two groups of patients with or without  $\Delta$ 500-532 mutant virus** (related to **Figure 3**). Age (**A**), gender (**B**), Ct values of ORF (**C**) and N gene (**D**) in qPCR tests were compared between groups of patients with (Y) or without (N)  $\Delta$ 500-532 mutant virus. P values for age and Ct values (Wilcox-tests), and gender (chi-square test) were shown. (**E**) The volcano plot shows clinical phenotypes that were significantly different between the two groups of patients with or without  $\Delta$ 500-532. The y-axis is the  $-\log_{10}$  p values of phenotypes the traits with p values less than 0.05 were shown. The x-axis shows the difference of Z score between cases with mutant or wildtype virus. See also **Table S8**. Alb/Glb, the albumin/globulin ratio; CD3<sup>+</sup>CD8<sup>+</sup>, CD3<sup>+</sup>CD8<sup>+</sup> cell count; ESR, erythrocyte sedimentation rate; eGFR, estimated glomerular filtration rate; MAP, mean arterial pressure; HBDH,  $\alpha$ -Hydroxybutyrate dehydrogenase. (**F**) Ranked enrichment analysis of severe and non-severe clinical phenotypes for  $\Delta$ 500-532. NES, normalized enrichment score. P values were adjusted using permutation.

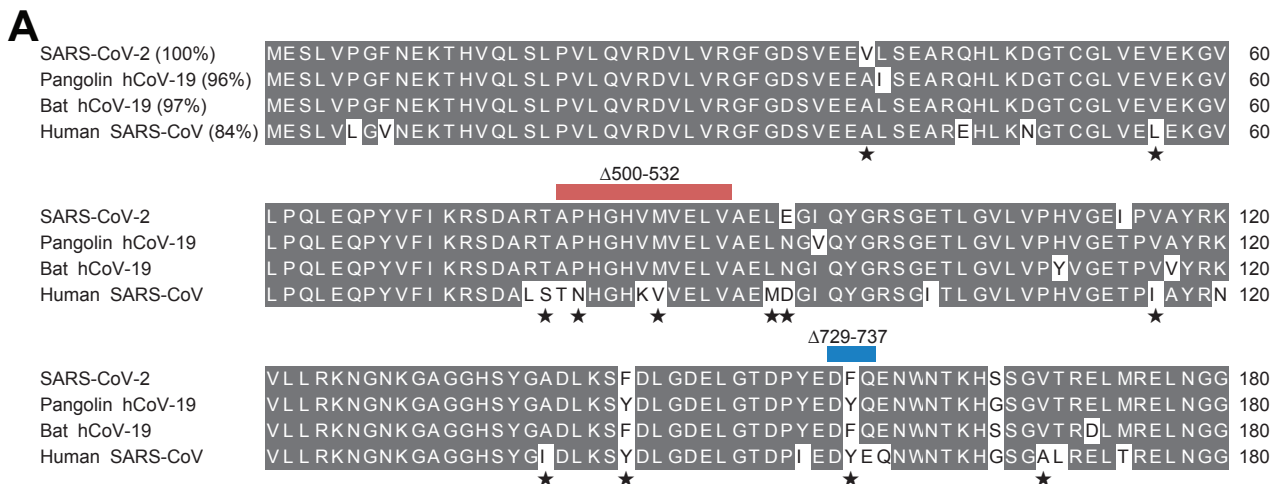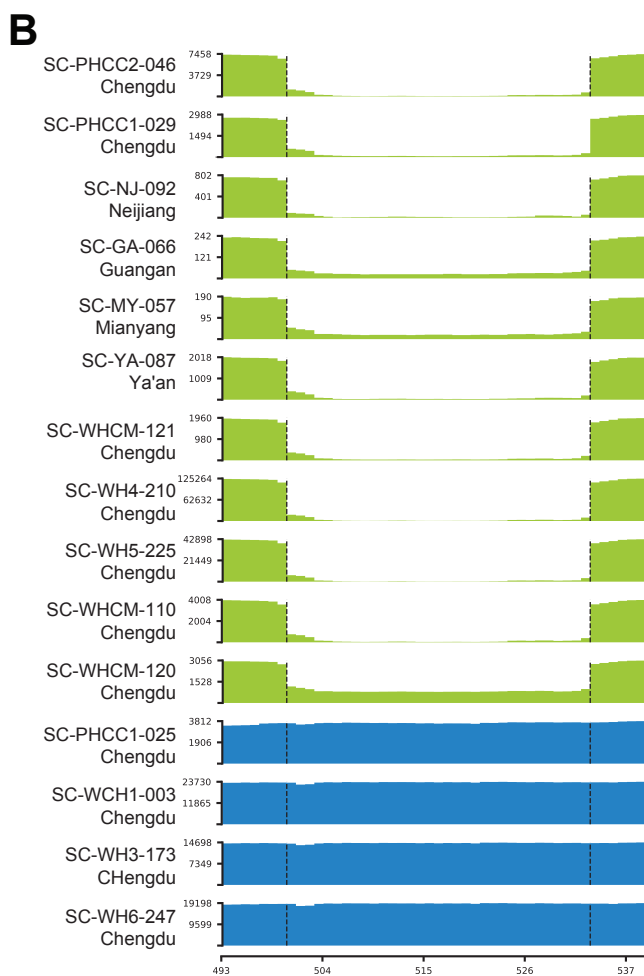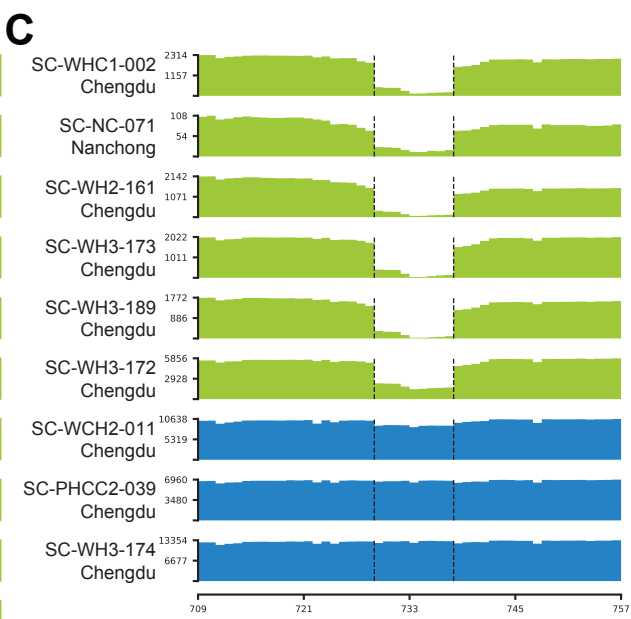

**Figure S6. Sequence alignment of Nsp1 proteins and genome coverage of two deletions in Nsp1** (related to **Figure 4** and **5**). **(A)** Alignment of Nsp1 amino acid sequences. Stars indicate amino acid substitutions that are of similar types. The percentages of amino acid identical to SARS-CoV-2 are shown in the brackets and the locations of the two deletions identified in this study are indicated. Sashimi plots of representative samples with **(B)**  $\Delta$ 500-532 or **(C)**  $\Delta$ 729-737 mutation (green), compared to samples without the corresponding deletion (blue).

**A**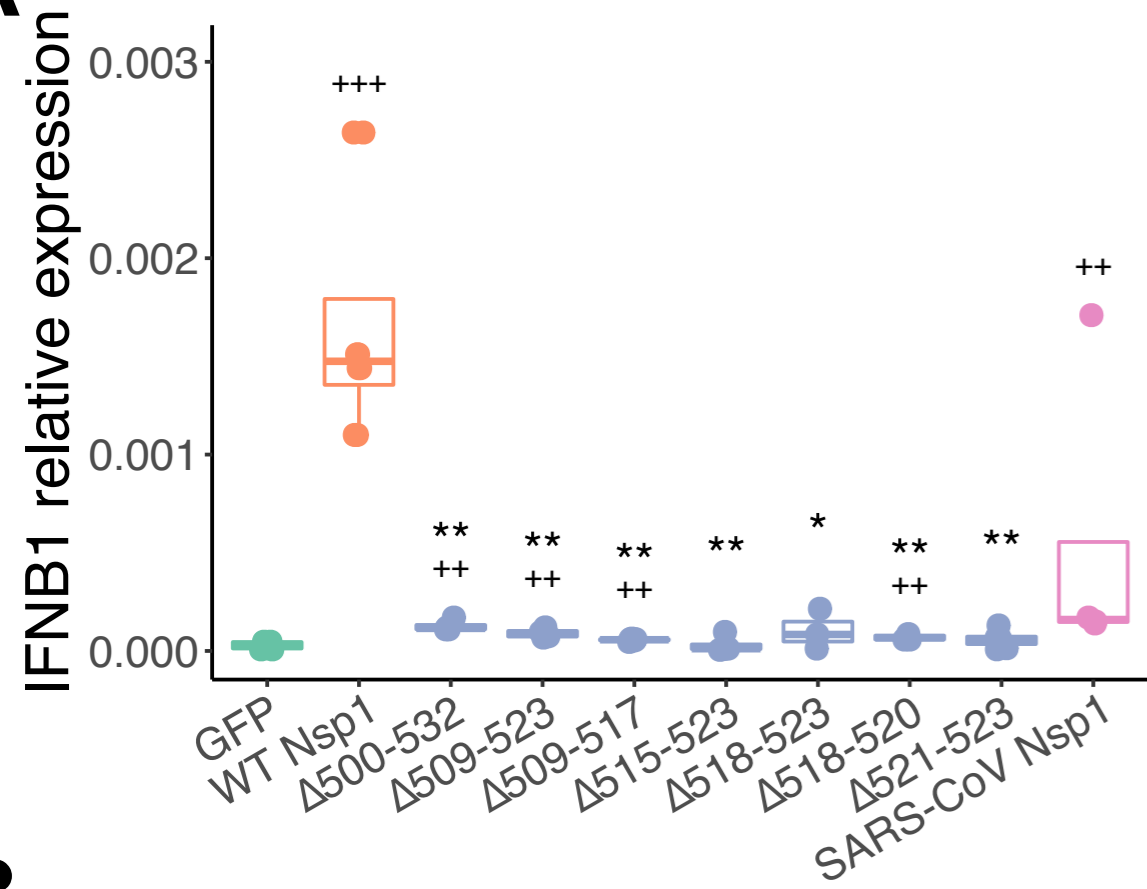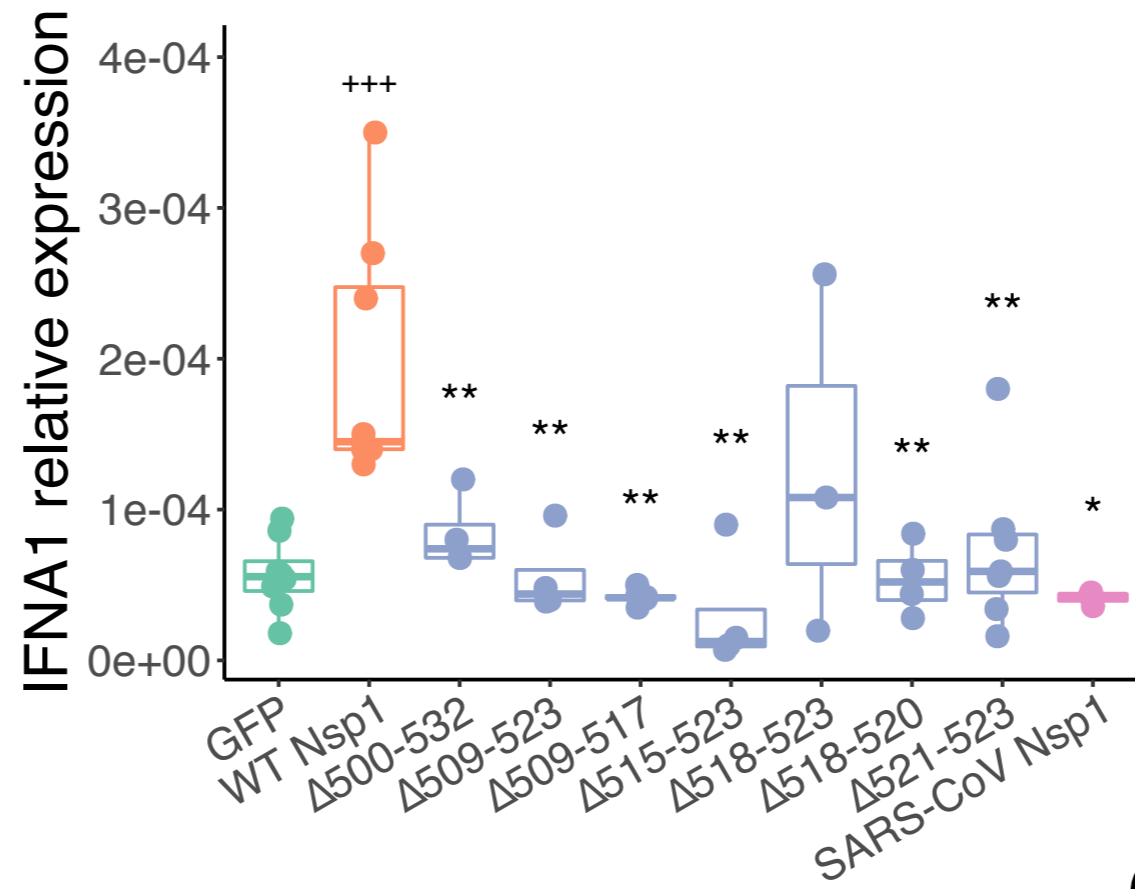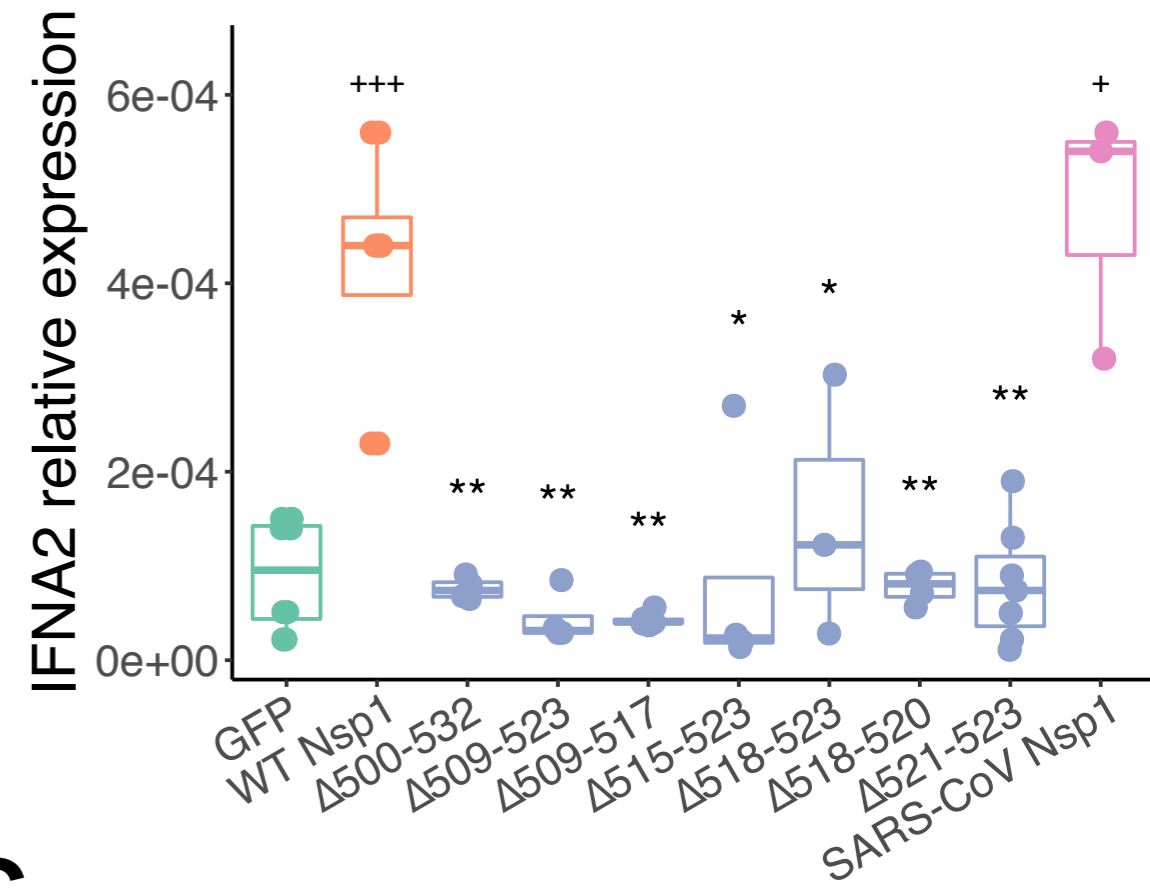**B**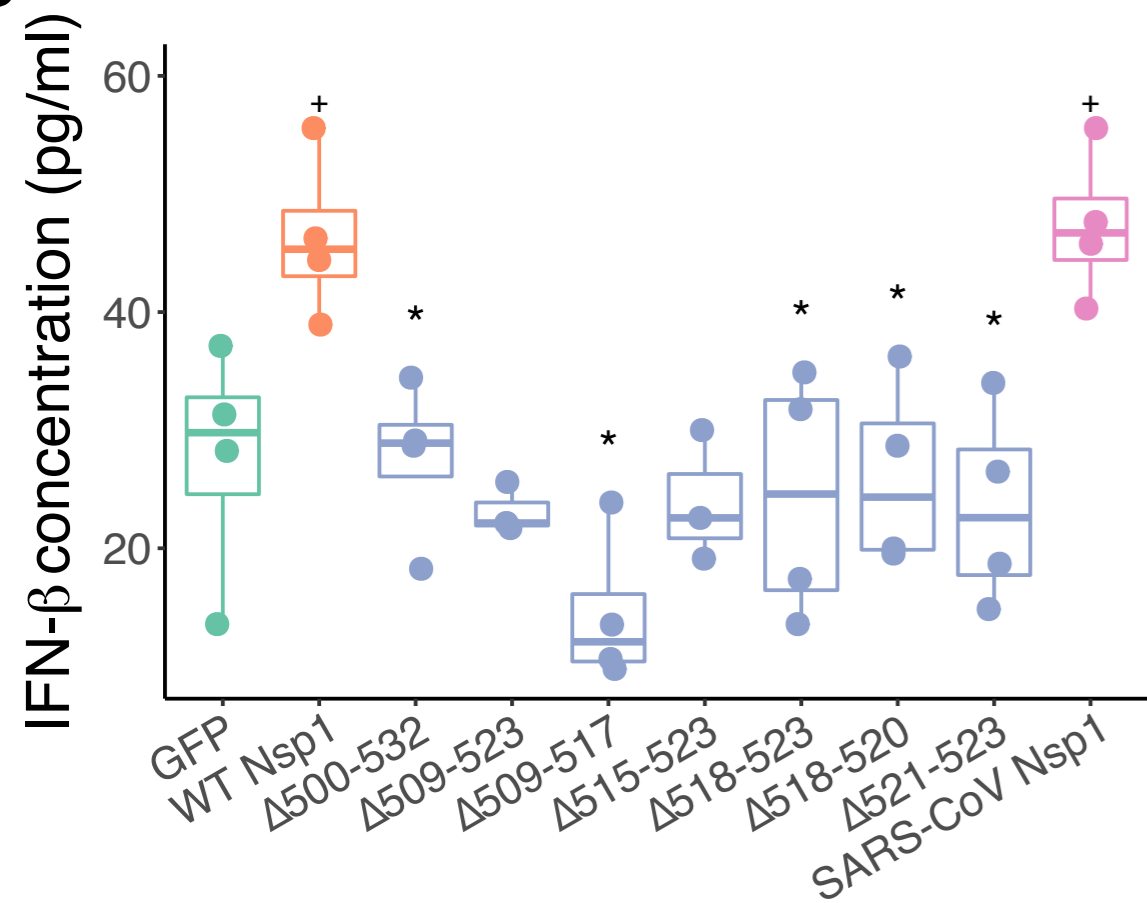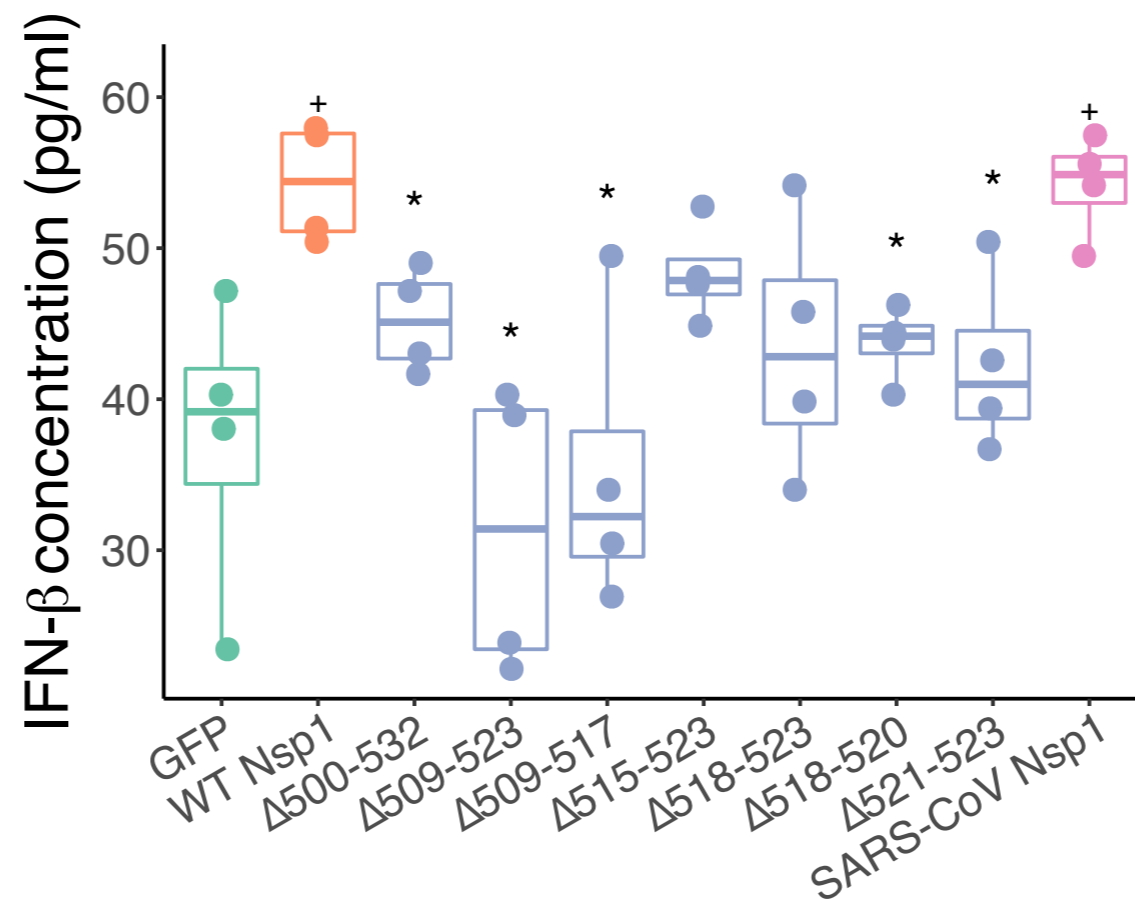**C**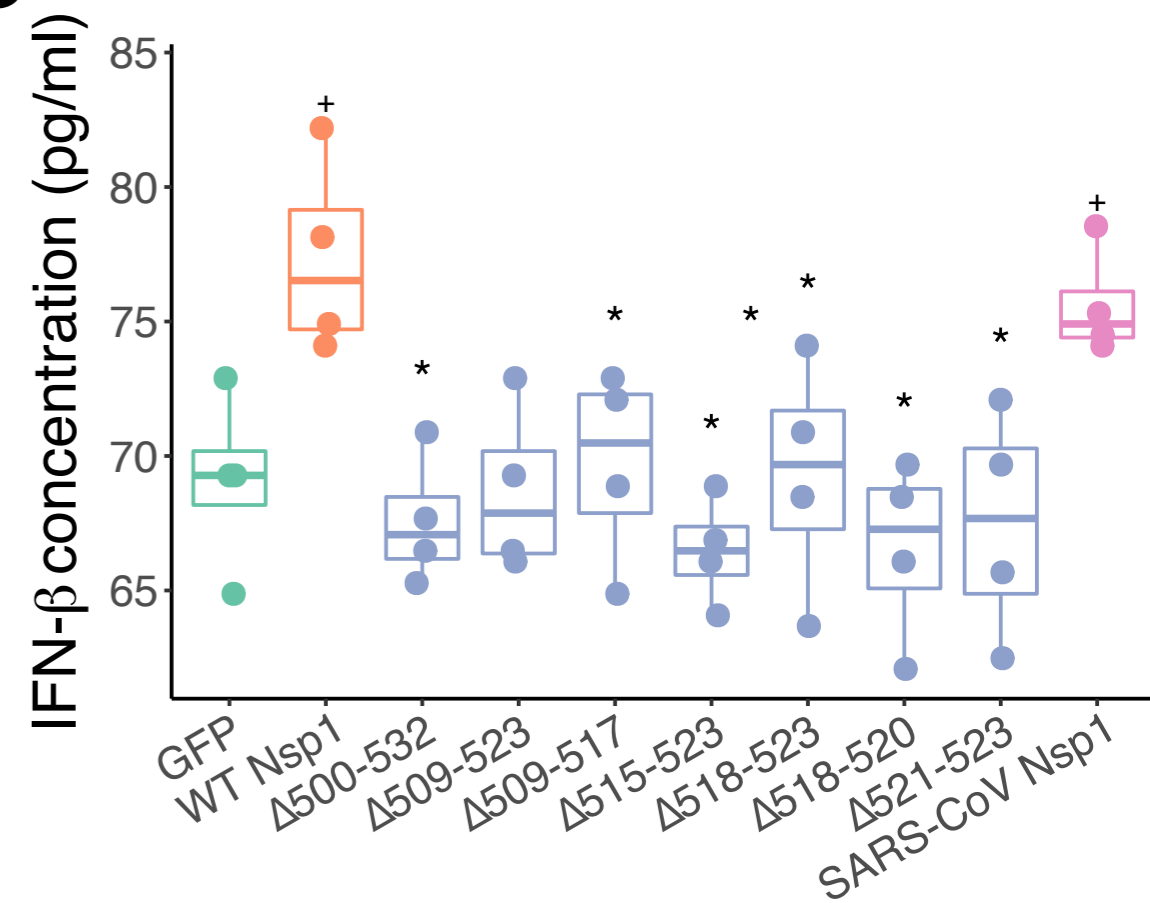

**Figure S7. Nsp1 mutants down-regulate IFN-I response** (related to **Figure 6**).

(A) Relative mRNA expression level of IFNB1, IFNA1 and IFNA2 to GAPDH in SARS-Cov-2 wildtype (WT) or mutant Nsp1-expressing HEK293T cells. (B) Concentration of IFN- $\beta$  in the supernatant (left) or cell lysate (right) of Nsp1-expressing HEK293T cells. (C) Concentration of IFN- $\beta$  in cell lysate of Nsp1-expressing A549 cells. GFP and SARS-CoV Nsp1 were used as negative and positive controls. + indicates statistical significance compared to GFP controls and \* indicates significance compared to WT SARS-CoV-2 Nsp1, Mann-Whitney U test was used.
