# Supplementary material
Source: PubMed Central journal article supplement (PMC7846228)
Supplement: mmc13.pdf [file mmc13.pdf]

**Data S1. Normalization and association of SARS-CoV-2 genetic variants with 117 clinical phenotypes (related to Figure 3)**

**Contents**

|                                                                                             |    |
|---------------------------------------------------------------------------------------------|----|
| 1. Alb (albumin).....                                                                       | 1  |
| 2. Alb/Glb (albumin/globulin).....                                                          | 2  |
| 3. ALP (alkaline phosphatase).....                                                          | 3  |
| 4. ALT (alanine aminotransferase).....                                                      | 4  |
| 5. ALT/AST (alanine transaminase / aspartate transaminase ratio ).....                      | 5  |
| 6. APTT (thromboplastin time).....                                                          | 6  |
| 7. AST (aspartate aminotransferase).....                                                    | 7  |
| 8. B cell count.....                                                                        | 8  |
| 9. B cell percentage.....                                                                   | 9  |
| 10. BASO (Basophil count).....                                                              | 10 |
| 11. BASO % (Basophil percentage).....                                                       | 11 |
| 12. Body temperature.....                                                                   | 12 |
| 13. BUN (blood urea nitrogen).....                                                          | 13 |
| 14. Ca <sup>2+</sup> (serum calcium).....                                                   | 14 |
| 15. CD3 % (CD3 percentage).....                                                             | 15 |
| 16. CD3 <sup>+</sup> (CD3 <sup>+</sup> T cell count).....                                   | 16 |
| 17. CD3 <sup>+</sup> CD4 <sup>+</sup> (CD3 <sup>+</sup> CD4 <sup>+</sup> count).....        | 17 |
| 18. CD3 <sup>+</sup> CD4 <sup>+</sup> % (CD3 <sup>+</sup> CD4 <sup>+</sup> percentage)..... | 18 |
| 19. CD3 <sup>+</sup> CD8 <sup>+</sup> (CD3 <sup>+</sup> CD8 <sup>+</sup> count).....        | 19 |
| 20. CD3 <sup>+</sup> CD8 <sup>+</sup> % (CD3 <sup>+</sup> CD8 <sup>+</sup> percentage)..... | 20 |
| 21. CD4/CD8 ratio (%).....                                                                  | 21 |
| 22. CD4 <sup>+</sup> (CD4 absolute count).....                                              | 22 |
| 23. CD8 <sup>+</sup> (CD8 absolute count).....                                              | 23 |
| 24. CHOL (cholesterol).....                                                                 | 24 |
| 25. CK (creatine kinase).....                                                               | 25 |
| 26. CK-MB (creatine kinase-MB).....                                                         | 26 |
| 27. Cl (chloride).....                                                                      | 27 |
| 28. Consolidation shadow percentage.....                                                    | 28 |
| 29. Consolidation shadows volume.....                                                       | 29 |
| 30. COVID-19 likelihood.....                                                                | 30 |
| 31. Cr (creatinine).....                                                                    | 31 |

|                                                          |    |
|----------------------------------------------------------|----|
| 32. CRP (C-reactive protein).....                        | 32 |
| 33. Cys-C (Cystatin C).....                              | 33 |
| 34. DBIL (direct bilirubin).....                         | 34 |
| 35. D-dimer .....                                        | 35 |
| 36. Diastolic pressure .....                             | 36 |
| 37. eGFR (estimated glomerular filtration rate).....     | 37 |
| 38. EOS (eosinophil count).....                          | 38 |
| 39. EOS % (eosinophil percentage).....                   | 39 |
| 40. ESR (erythrocyte sedimentation rate).....            | 40 |
| 41. FIB (fibrinogen).....                                | 41 |
| 42. GGO (ground-glass opacities).....                    | 42 |
| 43. GGO volume (volume of ground-glass opacity).....     | 43 |
| 44. GGT (gamma-glutamyl transferase).....                | 44 |
| 45. Glb (globin).....                                    | 45 |
| 46. GLU (glucose).....                                   | 46 |
| 47. NEUT (neutrophil count).....                         | 47 |
| 48. HBDH ( $\alpha$ -Hydroxybutyrate dehydrogenase)..... | 48 |
| 49. HCO <sub>3</sub> <sup>-</sup> (bicarbonate).....     | 49 |
| 50. HDL-C (high-density lipoprotein cholesterol).....    | 50 |
| 51. Hgb (hemoglobin).....                                | 51 |
| 52. HR (heart rate).....                                 | 52 |
| 53. hs-CRP (hypersensitive C-reactive protein).....      | 53 |
| 54. IBil (indirect bilirubin).....                       | 54 |
| 55. IFN- $\alpha$ (interferon alpha).....                | 55 |
| 56. IFN $\alpha$ 2 (interferon alpha-2).....             | 56 |
| 57. IFN- $\beta$ (interferon beta).....                  | 57 |
| 58. IFN- $\gamma$ (interferon gamma).....                | 58 |
| 59. IL-10 (interleukin 10).....                          | 59 |
| 60. IL-13 (interleukin 13).....                          | 60 |
| 61. IL-17A (interleukin 17A).....                        | 61 |
| 62. IL-17E (interleukin 17E).....                        | 62 |
| 63. IL-17F (interleukin 17F).....                        | 63 |
| 64. IL-1a (interleukin 1a).....                          | 64 |
| 65. IL-1b (interleukin 1b).....                          | 65 |
| 66. IL-2 (interleukin 2).....                            | 66 |
| 67. IL-21 (interleukin 21).....                          | 67 |
| 68. IL-22 (interleukin 22).....                          | 68 |

|                                                                     |     |
|---------------------------------------------------------------------|-----|
| 69. IL-23 (interleukin 3).....                                      | 69  |
| 70. IL-33 (interleukin 33).....                                     | 70  |
| 71. IL-4 (interleukin 4).....                                       | 71  |
| 72. IL-6 (interleukin 6).....                                       | 72  |
| 73. IL-8 (interleukin 8).....                                       | 73  |
| 74. INR (prothrombin time international normalized ratio).....      | 74  |
| 75. K <sup>+</sup> (serum potassium).....                           | 75  |
| 76. LA (lactic acid).....                                           | 76  |
| 77. LDH (lactate dehydrogenase).....                                | 77  |
| 78. LDL-C (low-density lipoprotein cholesterol).....                | 78  |
| 79. LYMPH % (lymphocyte percentage).....                            | 79  |
| 80. Lymphocyte (lymphocyte count).....                              | 80  |
| 81. MAP (mean arterial pressure).....                               | 81  |
| 82. MCH (mean corpuscular hemoglobin).....                          | 82  |
| 83. MCV (mean corpuscular volume).....                              | 83  |
| 84. Mg <sup>2+</sup> (serum magnesium).....                         | 84  |
| 85. Monocyte (monocyte count).....                                  | 85  |
| 86. Monocyte % (monocyte percentage).....                           | 86  |
| 87. Na <sup>+</sup> (serum sodium).....                             | 87  |
| 88. NK cell count.....                                              | 88  |
| 89. NK cell percentage.....                                         | 89  |
| 90. Normal likelihood (diagnostic accuracy of normal).....          | 90  |
| 91. Other pneumonia.....                                            | 91  |
| 92. Oxygen therapy.....                                             | 92  |
| 93. P (serum phosphorus).....                                       | 93  |
| 94. PaO <sub>2</sub> (partial pressure of oxygen).....              | 94  |
| 95. PCO <sub>2</sub> (partial pressure of carbon dioxide).....      | 95  |
| 96. PCT (procalcitonin).....                                        | 96  |
| 97. PCV (packed cell volume).....                                   | 97  |
| 98. Pleural effusion (interstitium thickness).....                  | 98  |
| 99. Pleural effusion volume (volume of interstitium thickness)..... | 99  |
| 100. PLT (platelet count).....                                      | 100 |
| 101. PT (prothrombin time).....                                     | 101 |
| 102. RBC (red blood cells count).....                               | 102 |
| 103. RBC Hgb (hemoglobin).....                                      | 103 |
| 104. RBC in urine.....                                              | 104 |
| 105. RBC/HPF (red blood cells per high power field).....            | 105 |

|                                                                                |     |
|--------------------------------------------------------------------------------|-----|
| 106. RDW-CV (red blood cell distribution width coefficient of variation) ..... | 106 |
| 107. RDW-SD (red blood cell distribution standard deviation).....              | 107 |
| 108. SaO <sub>2</sub> (oxygen saturation) .....                                | 108 |
| 109. Severe (severe probability).....                                          | 109 |
| 110. TBil (total bilirubin) .....                                              | 110 |
| 111. SP (systolic pressure).....                                               | 111 |
| 112. RF (respiratory frequency).....                                           | 112 |
| 113. TG (triglycerides) .....                                                  | 113 |
| 114. TNF- $\alpha$ (tumor necrosis factor alpha).....                          | 114 |
| 115. TP (total protein) .....                                                  | 115 |
| 116. UA (uric acid).....                                                       | 116 |
| 117. WBC (white blood cell count).....                                         | 117 |

## 1. Alb (albumin)

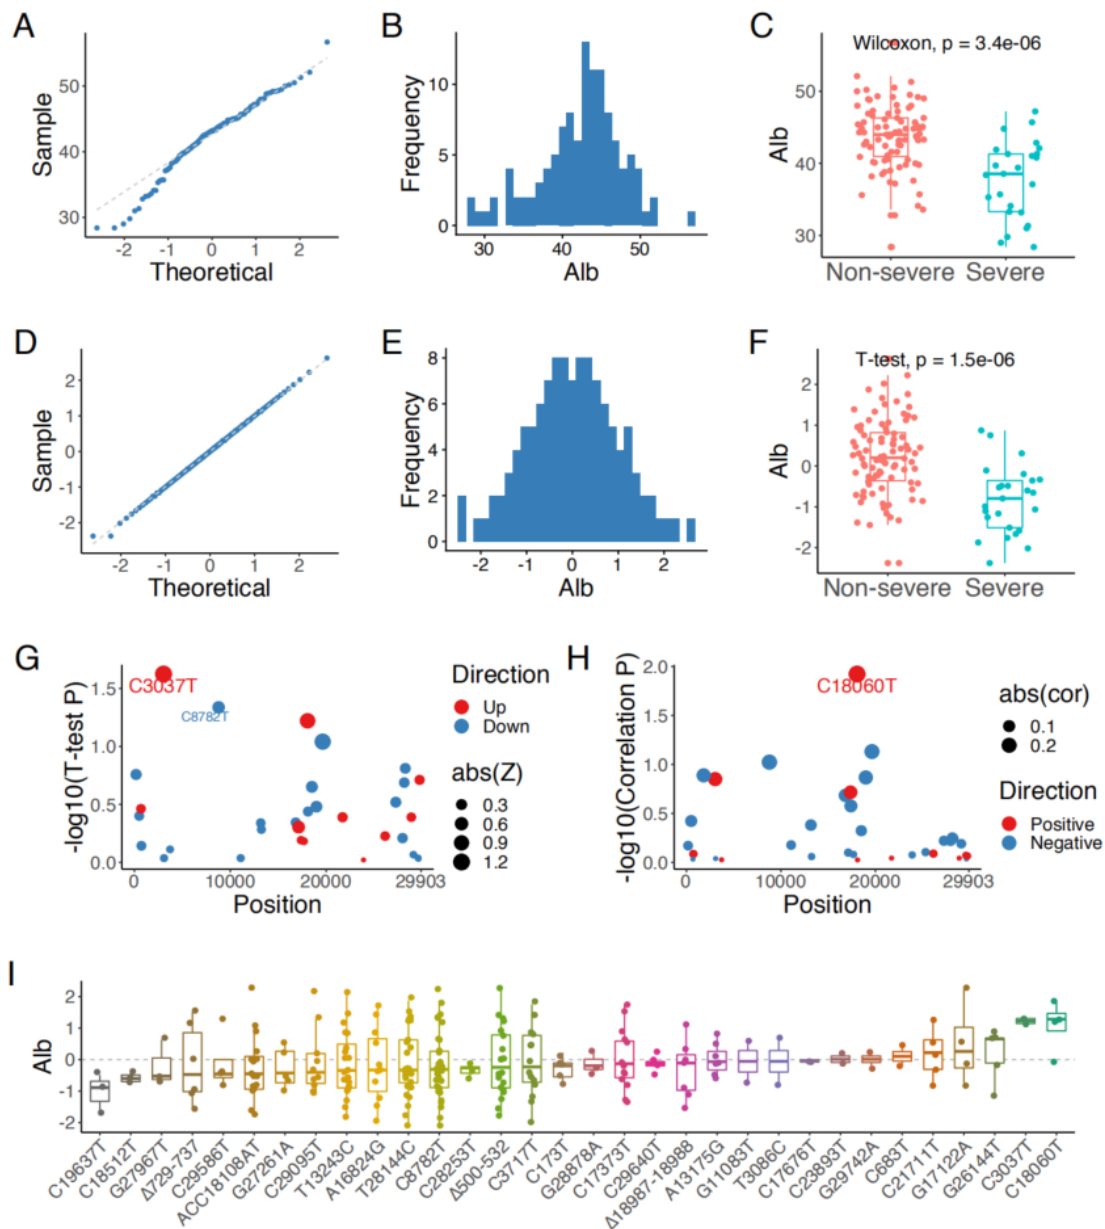

For Alb (albumin, g/L), quantile-quantile (QQ) plot and distribution plot before (A and B) and after normalization (D and E) were shown. We compared Alb in the non-severe and severe COVID-19 patients before (C,  $p = 3.4 \times 10^{-6}$ , Wilcoxon test) and after normalization (F,  $p = 1.5 \times 10^{-6}$ , T-test). (G) Variants C3037T and C8782T pass P value cut-off of 0.05 in T test. Red indicates higher mean value in cases with the variants and blue indicates higher mean value in cases without the variant. The size of symbols indicates absolute Z score number. (H) Variant C18060T has P value lower than 0.05 in Pearson correlation. Red and blue indicates positive and negative correlation, respectively. Size of the dots indicate absolute correlation coefficient. (I) After sorting Z score values of Alb, cases with C18060T and C3037T tend to have the highest Z score, whereas G1820A and C19637T have the lowest.

## 2. Alb/Glb (albumin/globulin)

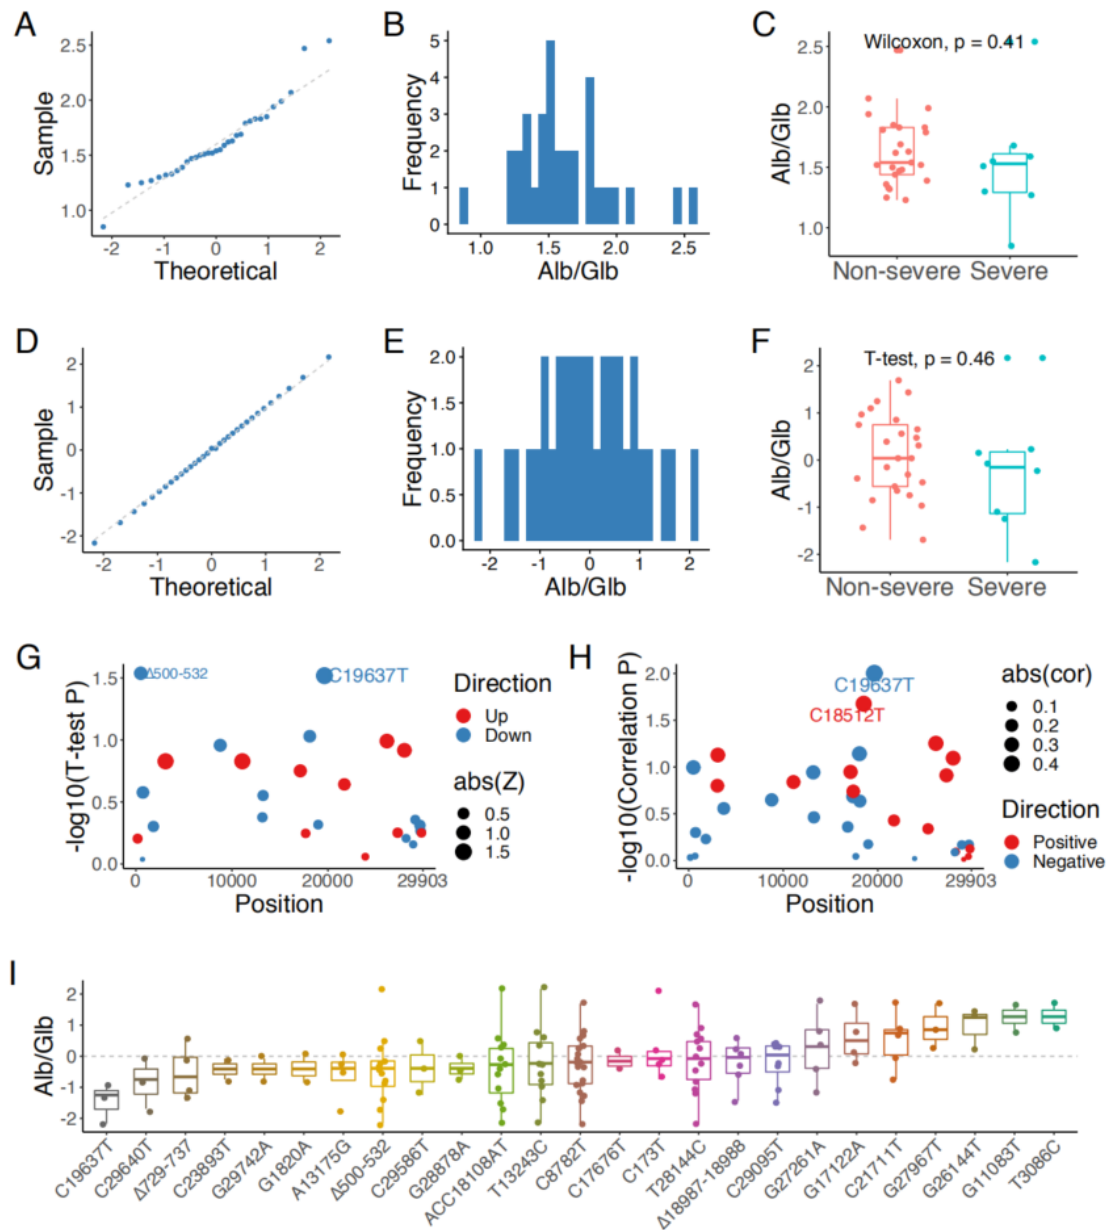

For Alb/Glb (Albumin/globulin ratio), quantile-quantile (QQ) plot and distribution plot before (A and B) and after normalization (D and E) were shown. We compared Alb/Glb in the non-severe and severe COVID-19 patients before (C,  $p = 0.41$ , Wilcoxon test) and after normalization (F,  $p = 0.46$ , T-test). (G) Variants  $\Delta 500-532$  and C19637T pass P value cut-off of 0.05 in T test. Red indicates higher mean value in cases with the variants and blue indicates higher mean value in cases without the variant. The size of symbols indicates absolute Z score number. (H) Variants C19637T and C18512T have P value lower than 0.05 in Pearson correlation. Red and blue indicates positive and negative correlation, respectively. Size of the dots indicate absolute correlation coefficient. (I) After sorting Z score values of Alb/Glb, cases with T3086C and G11083T tend to have the highest Z score, while cases with C19637T and

C29640T have the lowest.

### 3. ALP (alkaline phosphatase)

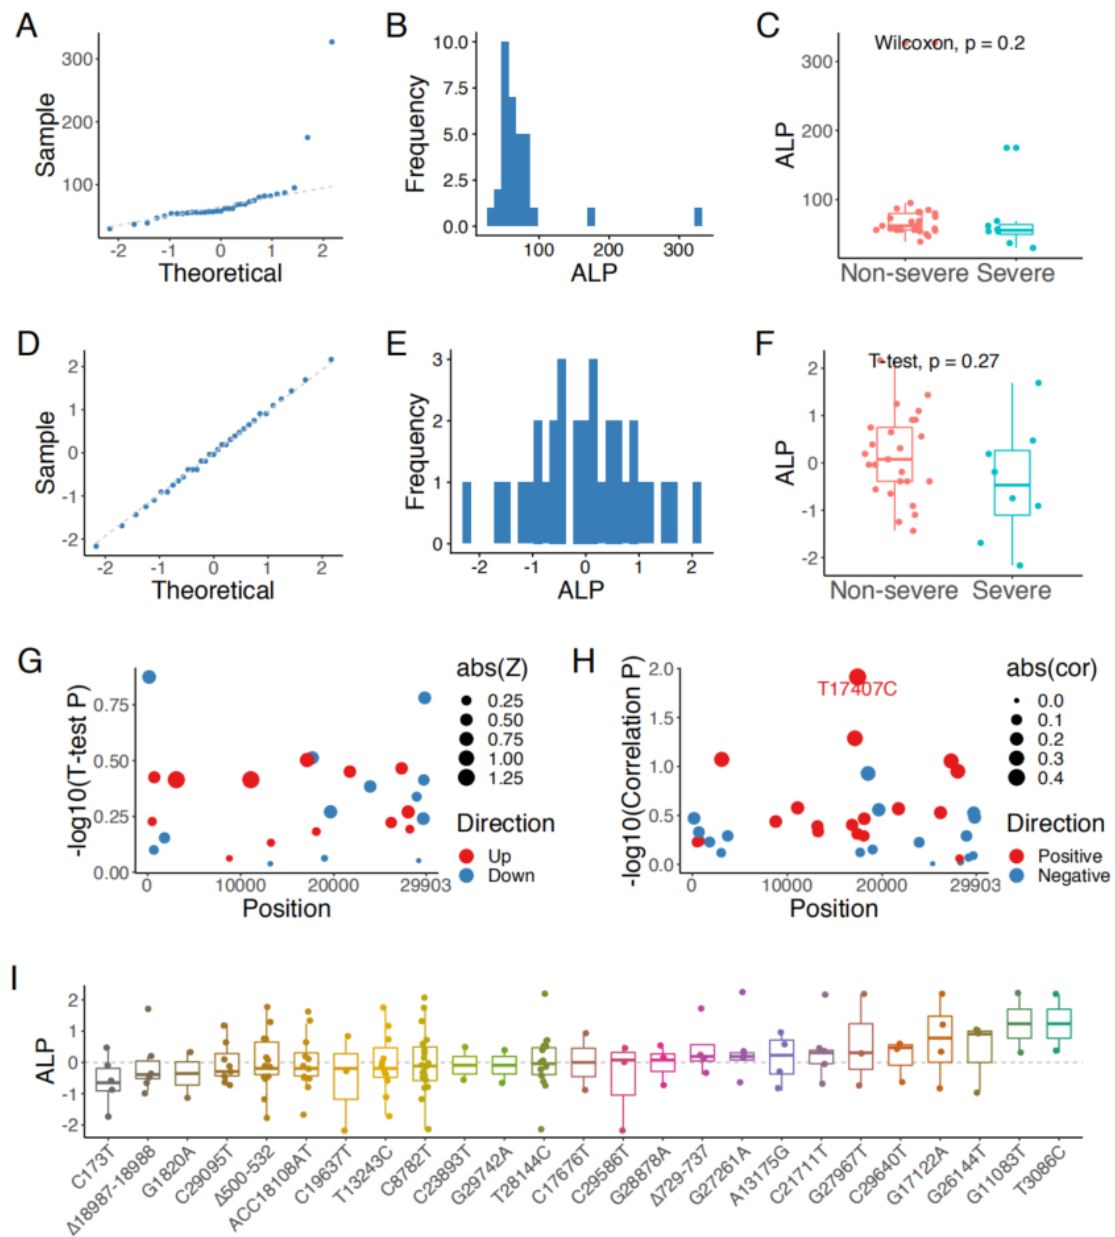

For ALP (alkaline phosphatase, U/L), quantile-quantile (QQ) plot and distribution plot before (A and B) and after normalization (D and E) were shown. We compared ALP in the non-severe and severe COVID-19 patients before (C,  $p = 0.2$ , Wilcoxon test) and after normalization (F,  $p = 0.27$ , T-test). (G) No variant passes P value cut-off of 0.05 in T test. (H) Variant T17407C has P value lower than 0.05 in Pearson correlation. Red and blue indicates positive and negative correlation, respectively. Size of the dots indicate absolute correlation coefficient. (I) After sorting Z score values of ALP, cases with T3086C and G11083T tend to have the highest Z score, whereas cases with C173T tends to have the lowest.

## 4. ALT (alanine aminotransferase)

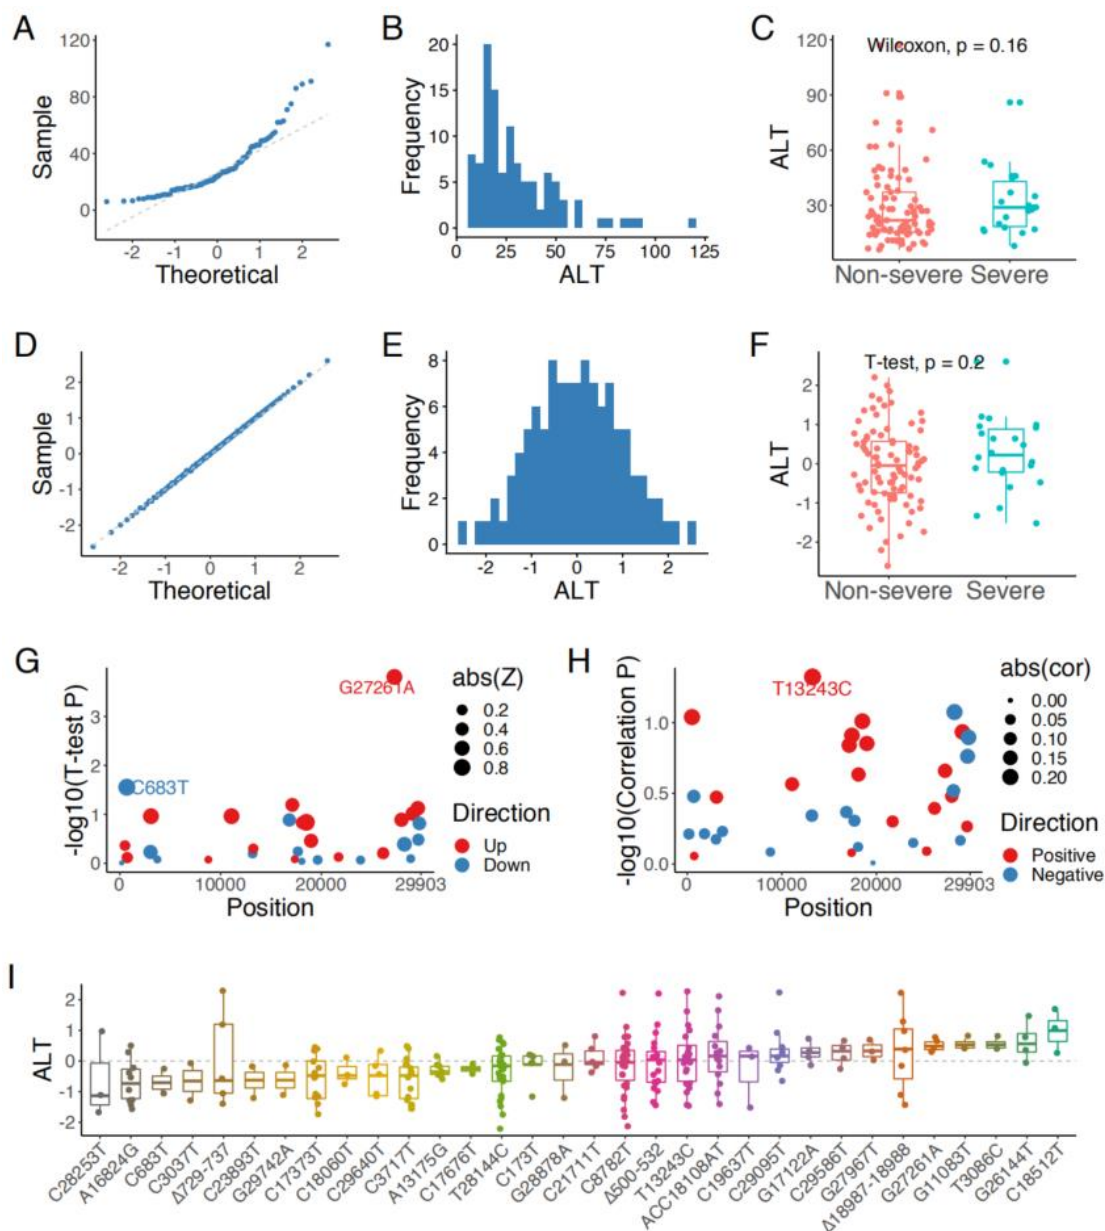

For ALT (alanine aminotransferase, U/L), quantile-quantile (QQ) plot and distribution plot before (A and B) and after normalization (D and E) were shown. We compared ALT in the non-severe and severe COVID-19 patients before (C,  $p = 0.16$ , Wilcoxon test) and after normalization (F,  $p = 0.2$ , T-test). (G) Variants G27261A and C683T pass P value cut-off of 0.05 in T test. Red indicates higher mean value in cases with the variants and blue indicates higher mean value in cases without the variant. The size of symbols indicates absolute Z score number. (H) Variant T13243C has P value lower than 0.05 in Pearson correlation. Red and blue indicates positive and negative correlation, respectively. Size of the dots indicate absolute correlation coefficient. (I) After sorting Z score values of ALT, cases with C18512T and G26144T tend to have the highest Z score, whereas cases with C28253T and A16824G have the lowest.



## 5. ALT/AST (alanine transaminase / aspartate transaminase ratio)

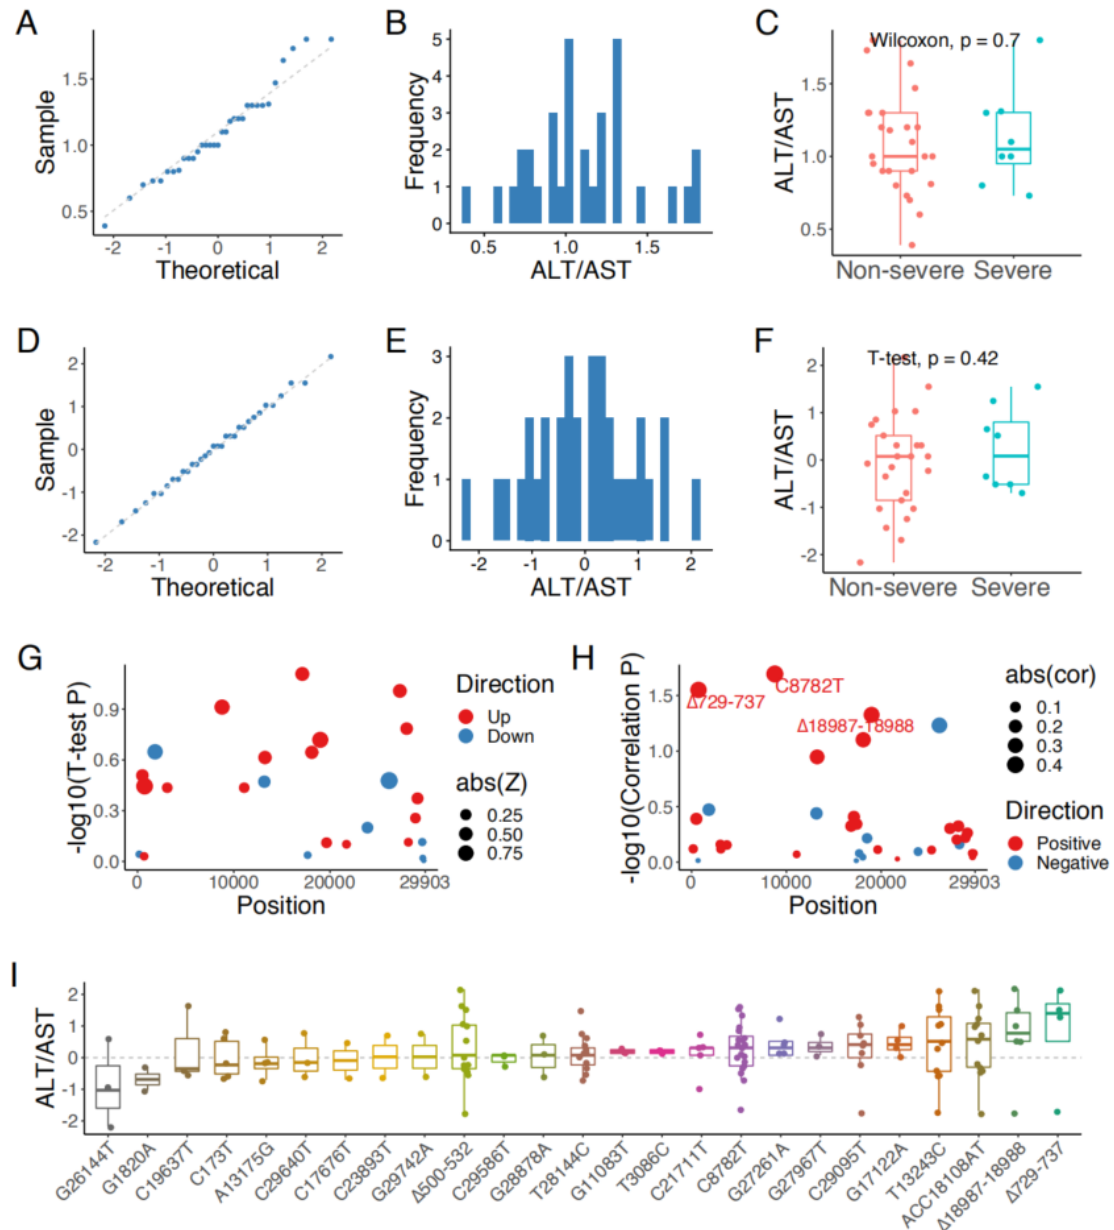

For ALT/AST (alanine transaminase / aspartate transaminase ratio), quantile-quantile (QQ) plot and distribution plot before (A and B) and after normalization (D and E) were shown. We compared ALT/AST in the non-severe and severe COVID-19 patients before (C,  $p = 0.7$ , Wilcoxon test) and after normalization (F,  $p = 0.42$ , T-test). We further performed association analyses between the 35 genetic variants and ALT/AST using T-test and Pearson correlation. (G) No variant passes P value cut-off of 0.05 in T test. (H) Variants C8782T,  $\Delta 729-737$  and  $\Delta 18987-18988$  have P value lower than 0.05 in Pearson correlation. Red and blue indicates positive and negative correlation, respectively. Size of the dots indicate absolute correlation coefficient. (I) After sorting Z score values of ALT/AST, cases with  $\Delta 729-737$  and  $\Delta 18987-18988$  tend to have the highest Z score, whereas cases with G26144T and G1820A have the lowest.

## 6. APTT (thromboplastin time)

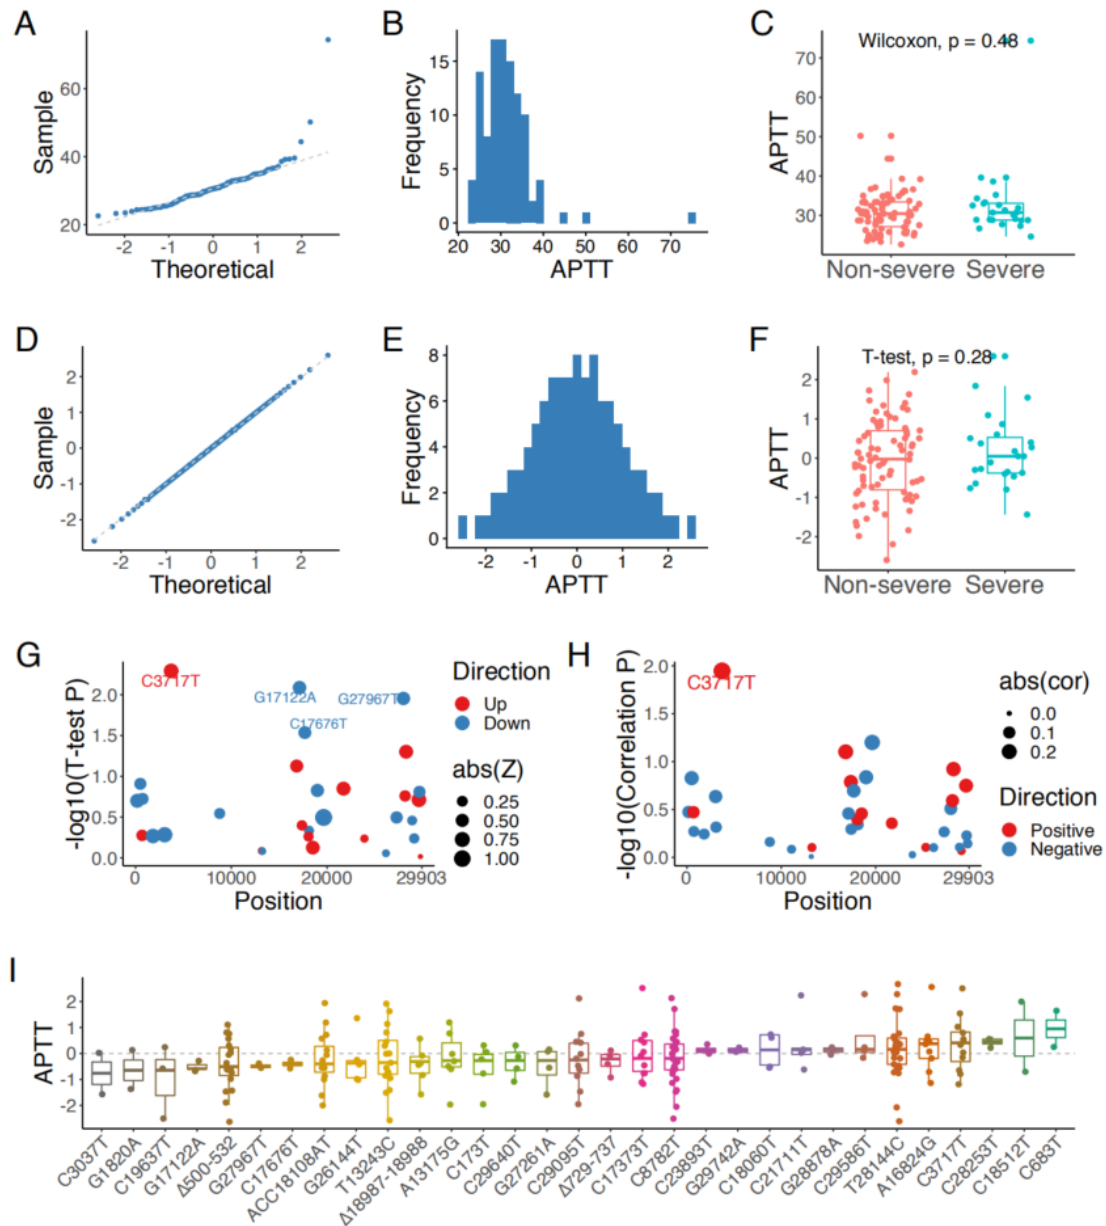

For APTT (thromboplastin time, sec), quantile-quantile (QQ) plot and distribution plot before (A and B) and after normalization (D and E) were shown. We compared APTT in the non-severe and severe COVID-19 patients before (C,  $p = 0.48$ , Wilcoxon test) and after normalization (F,  $p = 0.28$ , T-test). We further performed association analyses between the 35 genetic variants and APTT using T-test and Pearson correlation. (G) Variants C3717T, G17122A, G27967T and C17676T pass P value cut-off of 0.05 in T test. Red indicates higher mean value in cases with the variants and blue indicates higher mean value in cases without the variant. The size of symbols indicates absolute Z score number. (H) Variant C3717T has P value lower than 0.05 in Pearson correlation. Red and blue indicates positive and negative correlation, respectively. Size of the dots indicate absolute correlation coefficient. (I) After sorting Z score values of APTT, cases with C683T and C18512T tend to have the highest Z score, whereas cases with C3037T and G1820A have the lowest.

## 7. AST (aspartate aminotransferase)

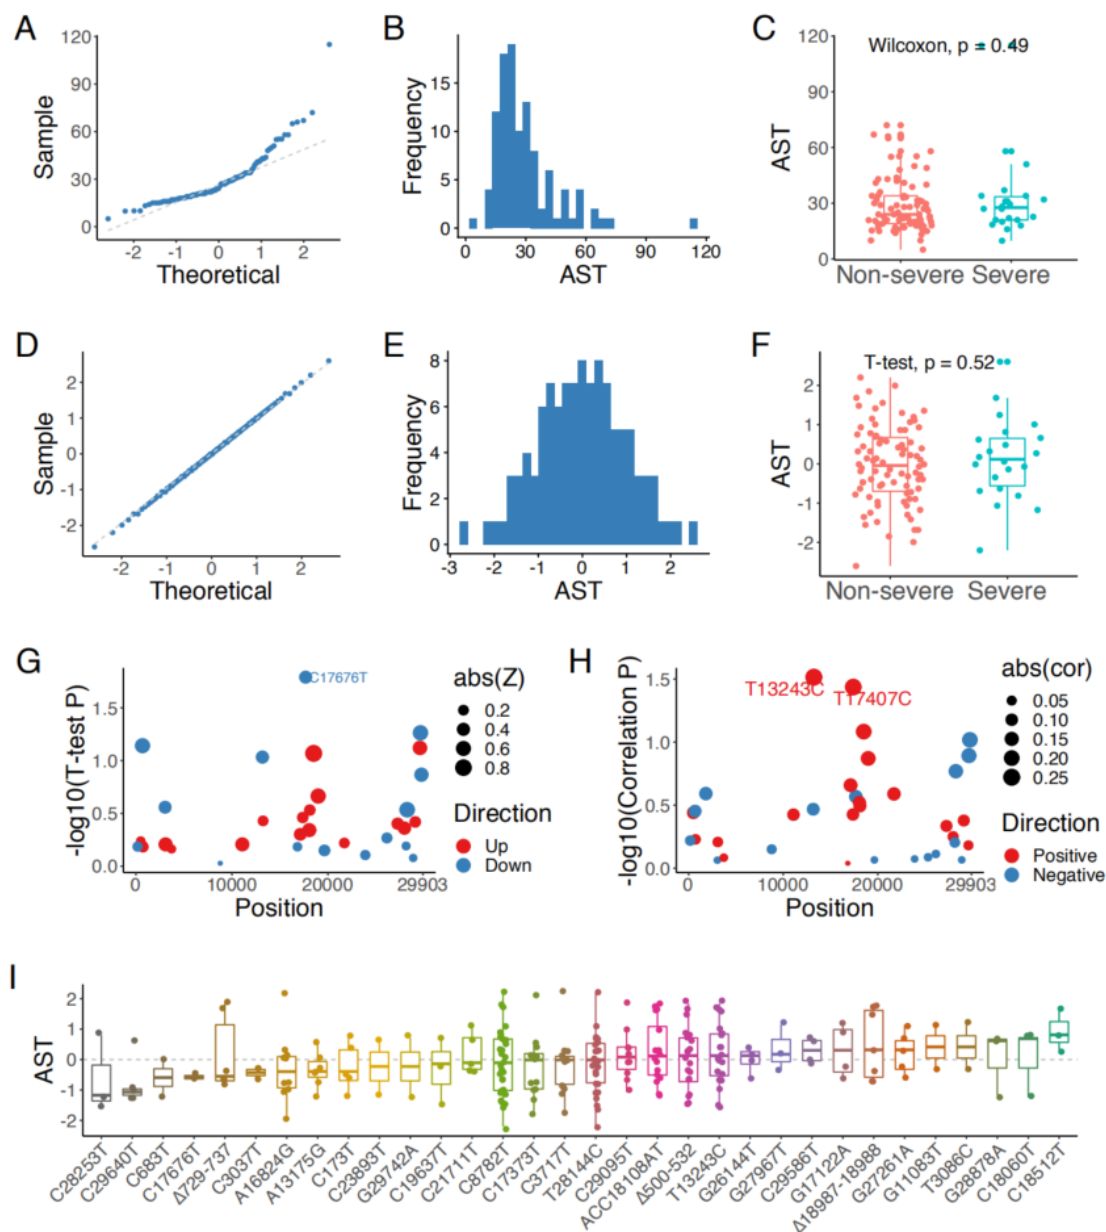

For AST (aspartate aminotransferase, U/L), quantile-quantile (QQ) plot and distribution plot before (A and B) and after normalization (D and E) were shown. We compared AST in the non-severe and severe COVID-19 patients before (C,  $p = 0.49$ , Wilcoxon test) and after normalization (F,  $p = 0.52$ , T-test). (G) Variant C17676T passes P value cut-off of 0.05 in T test. Red indicates higher mean value in cases with the variants and blue indicates higher mean value in cases without the variant. The size of symbols indicates absolute Z score number. (H) Variants T13243C and T17407C have P value lower than 0.05 in Pearson correlation. Red and blue indicates positive and negative correlation, respectively. Size of the dots indicate absolute correlation coefficient. (I) After sorting Z score values of AST, cases with C18512T have the highest Z score, whereas cases with C29640T and C28253T have the lowest.

## 8. B cell count

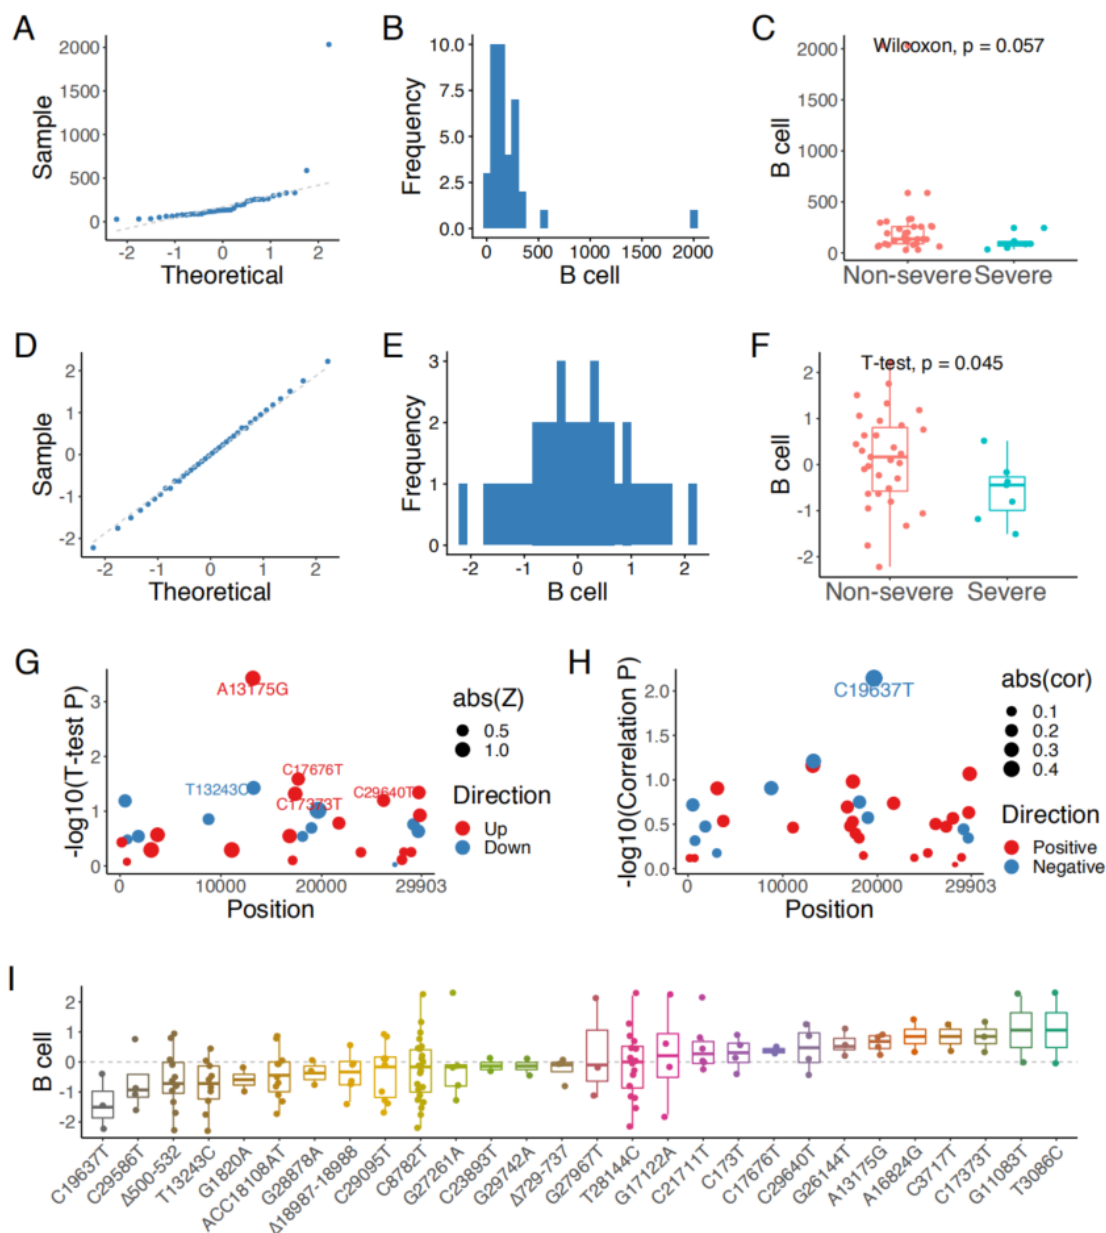

For B cell count ( $\times 10^9/L$ ), quantile-quantile (QQ) plot and distribution plot before (A and B) and after normalization (D and E) were shown. We compared B cell counts in the non-severe and severe COVID-19 patients before (C,  $p = 0.057$ , Wilcoxon test) and after normalization (F,  $p = 0.045$ , T-test). We further performed association analyses between the 35 genetic variants and B cell using T-test and Pearson correlation. (G) Variants A13175G, C17676T, C17373T, T13243O and C29640T pass P value cut-off of 0.05 in T test. Red indicates higher mean value in cases with the variants and blue indicates higher mean value in cases without the variant. The size of symbols indicates absolute Z score number. (H) Variant C19637T has P value lower than 0.05 in Pearson correlation. Red and blue indicates positive and negative correlation, respectively. Size of the dots indicate absolute correlation coefficient. (I) After sorting Z score values of B cell, cases with T3086C and G11083T tend to have the highest Z score, whereas cases with C19637T and C29586T have the lowest.

## 9. B cell percentage

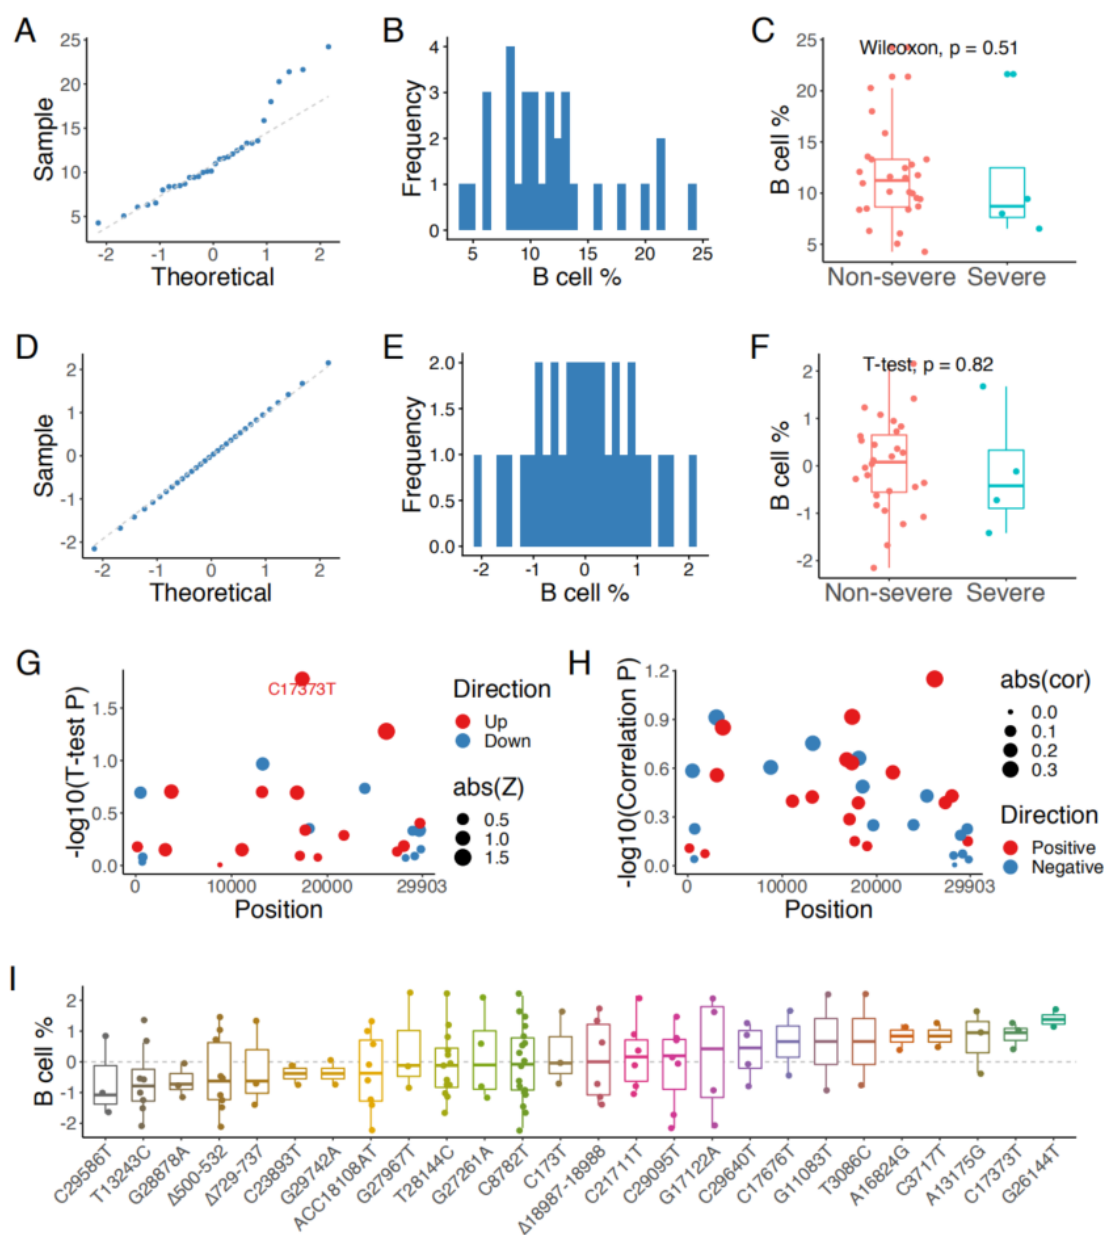

For B cell % (B cell percentage, %), quantile-quantile (QQ) plot and distribution plot before (A and B) and after normalization (D and E) were shown. We compared B cell % in the non-severe and severe COVID-19 patients before (C,  $p = 0.51$ , Wilcoxon test) and after normalization (F,  $p = 0.82$ , T-test). Variant C17373T passes P value cut-off of 0.05 in T test. Red indicates higher mean value in cases with the variants and blue indicates higher mean value in cases without the variant. The size of symbols indicates absolute Z score number. (H) No variant in Pearson correlation was has P value below 0.05. After sorting Z score values of B cell %, cases with G26144T and C17373T tend to have the highest Z score, whereas cases with C29586T and T13243C have the lowest.

## 10. BASO (Basophil count)

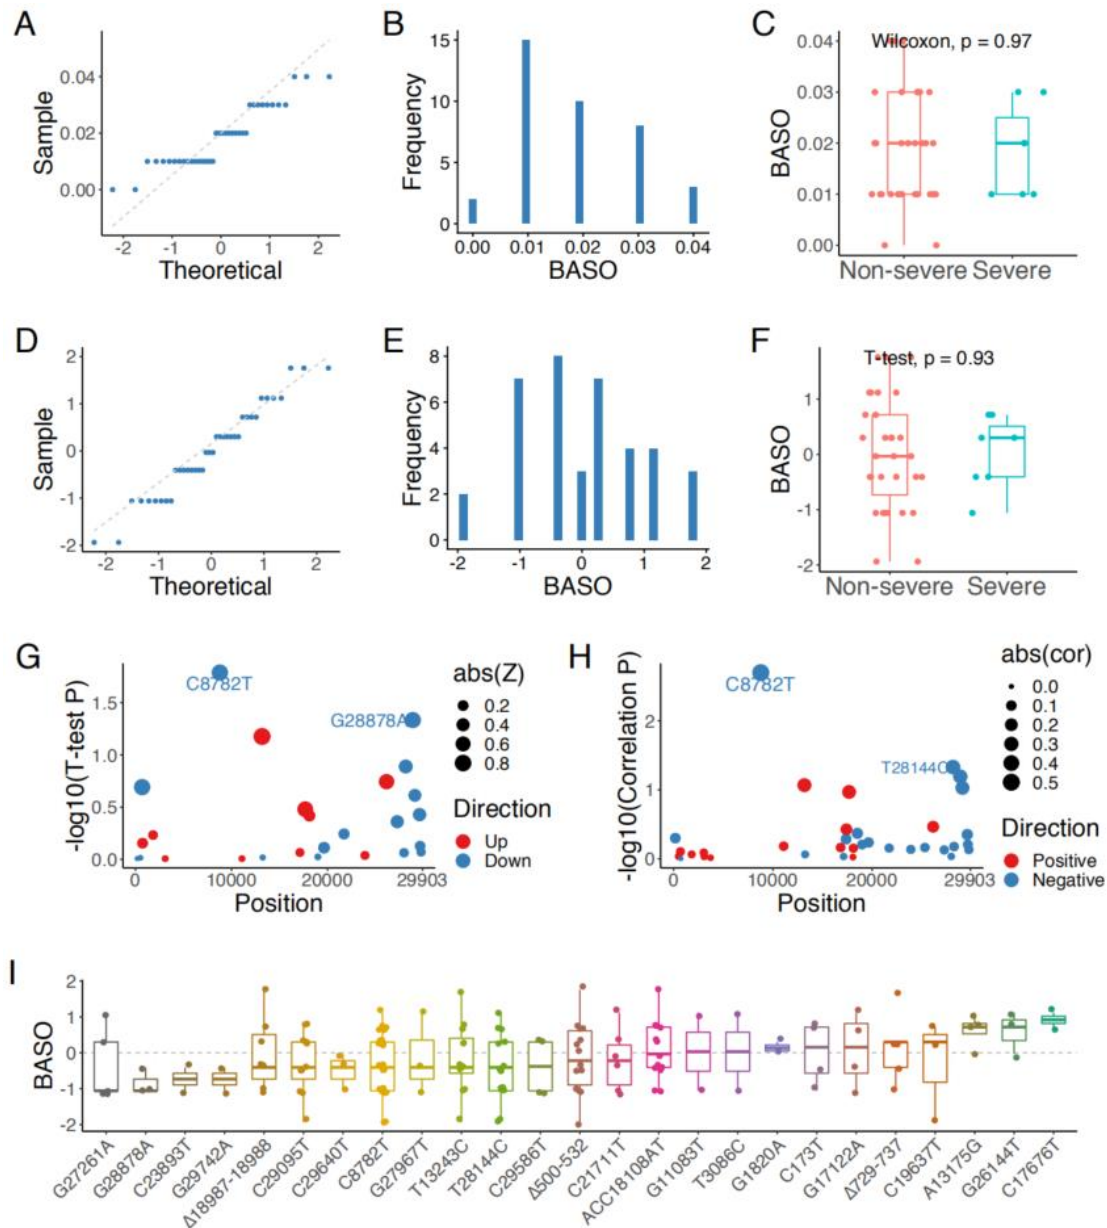

For BASO (Basophil count,  $\times 10^9/L$ ), quantile-quantile (QQ) plot and distribution plot before (A and B) and after normalization (D and E) were shown. We compared BASO in the non-severe and severe COVID-19 patients before (C,  $p = 0.97$ , Wilcoxon test) and after normalization (F,  $p = 0.93$ , T-test). We further performed association analyses between the 35 genetic variants and BASO using T-test and Pearson correlation. (G) Variants C8782T and G28878A pass P value cut-off of 0.05 in T test. Red indicates higher mean value in cases with the variants and blue indicates higher mean value in cases without the variant. The size of symbols indicates absolute Z score number. (H) Variants C8782T and T28144C have P value lower than 0.05 in Pearson correlation. Red and blue indicates positive and negative correlation, respectively. Size of the dots indicate absolute correlation coefficient. (I) After sorting Z score values of BASO, cases with C17676T and G26144T tend to have the highest Z score, whereas cases with G27261A and G28878A have the lowest.

## 11. BASO % (Basophil percentage)

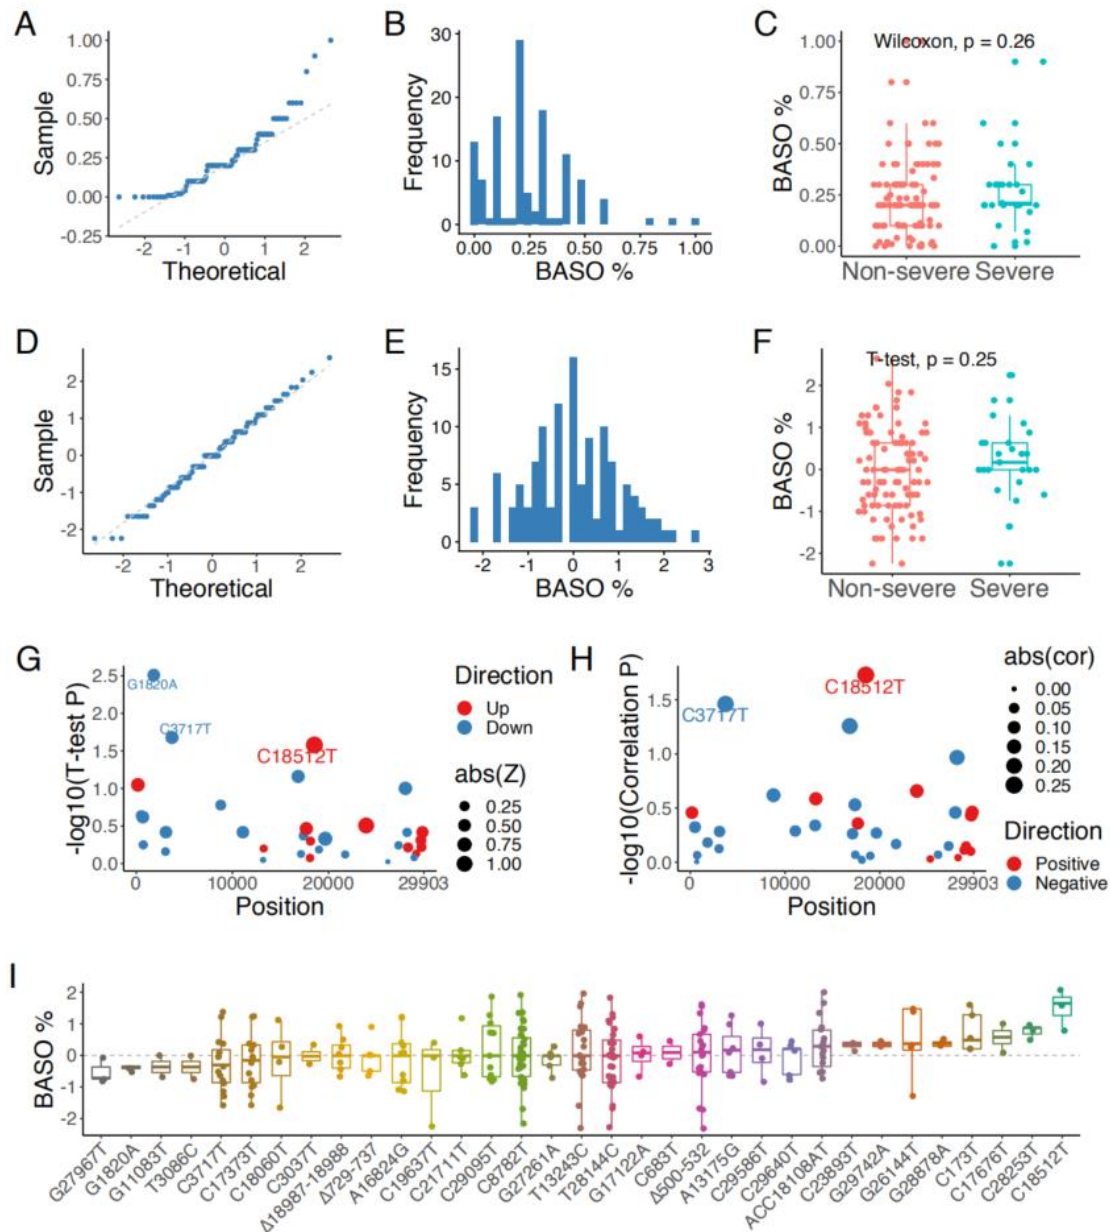

For BASO % (basophil percentage, %), quantile-quantile (QQ) plot and distribution plot before (A and B) and after normalization (D and E) were shown. We compared BASO % in the non-severe and severe COVID-19 patients before (C,  $p = 0.26$ , Wilcoxon test) and after normalization (F,  $p = 0.25$ , T-test). We further performed association analyses between the 35 genetic variants and BASO% using T-test and Pearson correlation. (G) Variants G1820A, C3717T and C18512T pass P value cut-off of 0.05 in T test. Red indicates higher mean value in cases with the variants and blue indicates higher mean value in cases without the variant. The size of symbols indicates absolute Z score number. (H) Variants C18512T and C3717T have P value lower than 0.05 in Pearson correlation. Red and blue indicates positive and negative correlation, respectively. Size of the dots indicate absolute correlation coefficient. (I) After sorting Z score values of BASO %, cases with C18512T and C28253T tend to have the highest Z score, whereas cases with G27967T and G1820A have the lowest.

## 12. Body temperature

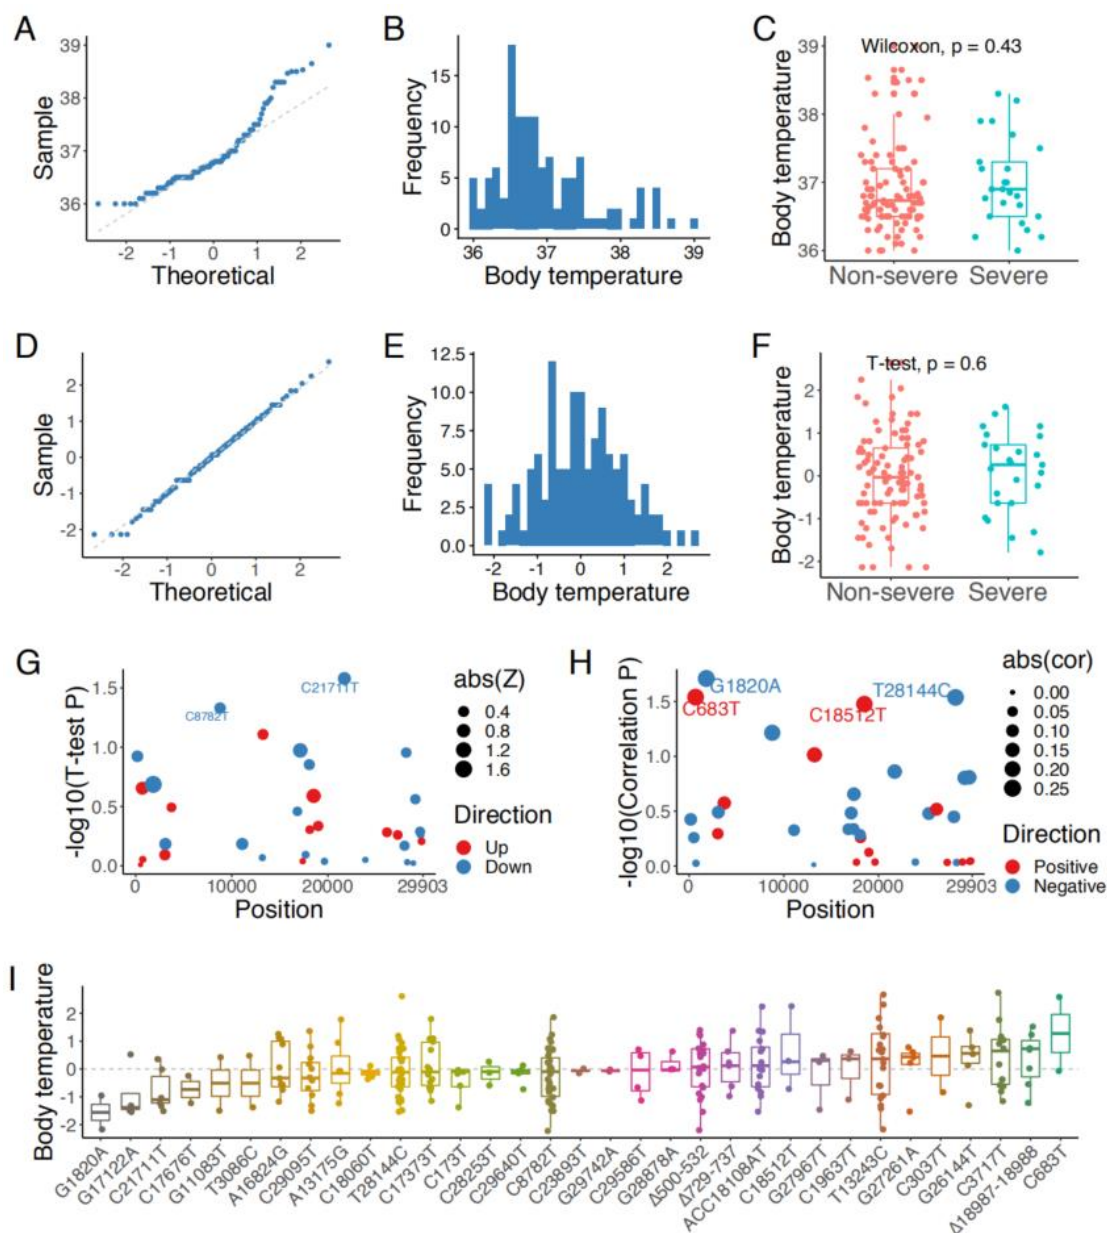

For Body temperature ( $^{\circ}\text{C}$ ), quantile-quantile (QQ) plot and distribution plot before (A and B) and after normalization (D and E) were shown. We compared Body temperature in the non-severe and severe COVID-19 patients before (C,  $p = 0.43$ , Wilcoxon test) and after normalization (F,  $p = 0.6$ , T-test). (G) Variants C21711T and C8782T pass P value cut-off of 0.05 in T test. Red indicates higher mean value in cases with the variants and blue indicates higher mean value in cases without the variant. The size of symbols indicates absolute Z score number. (H) Variants G1820A, C683T, C18512T and T28144C have P value lower than 0.05 in Pearson correlation. Red and blue indicates positive and negative correlation, respectively. Size of the dots indicate absolute correlation coefficient. (I) After sorting Z score values of Body temperature, cases with C683T and  $\Delta 18987\text{-}18988$  tend to have the highest Z score, whereas cases with G1820A and T17122A have the lowest.



### 13. BUN (blood urea nitrogen)

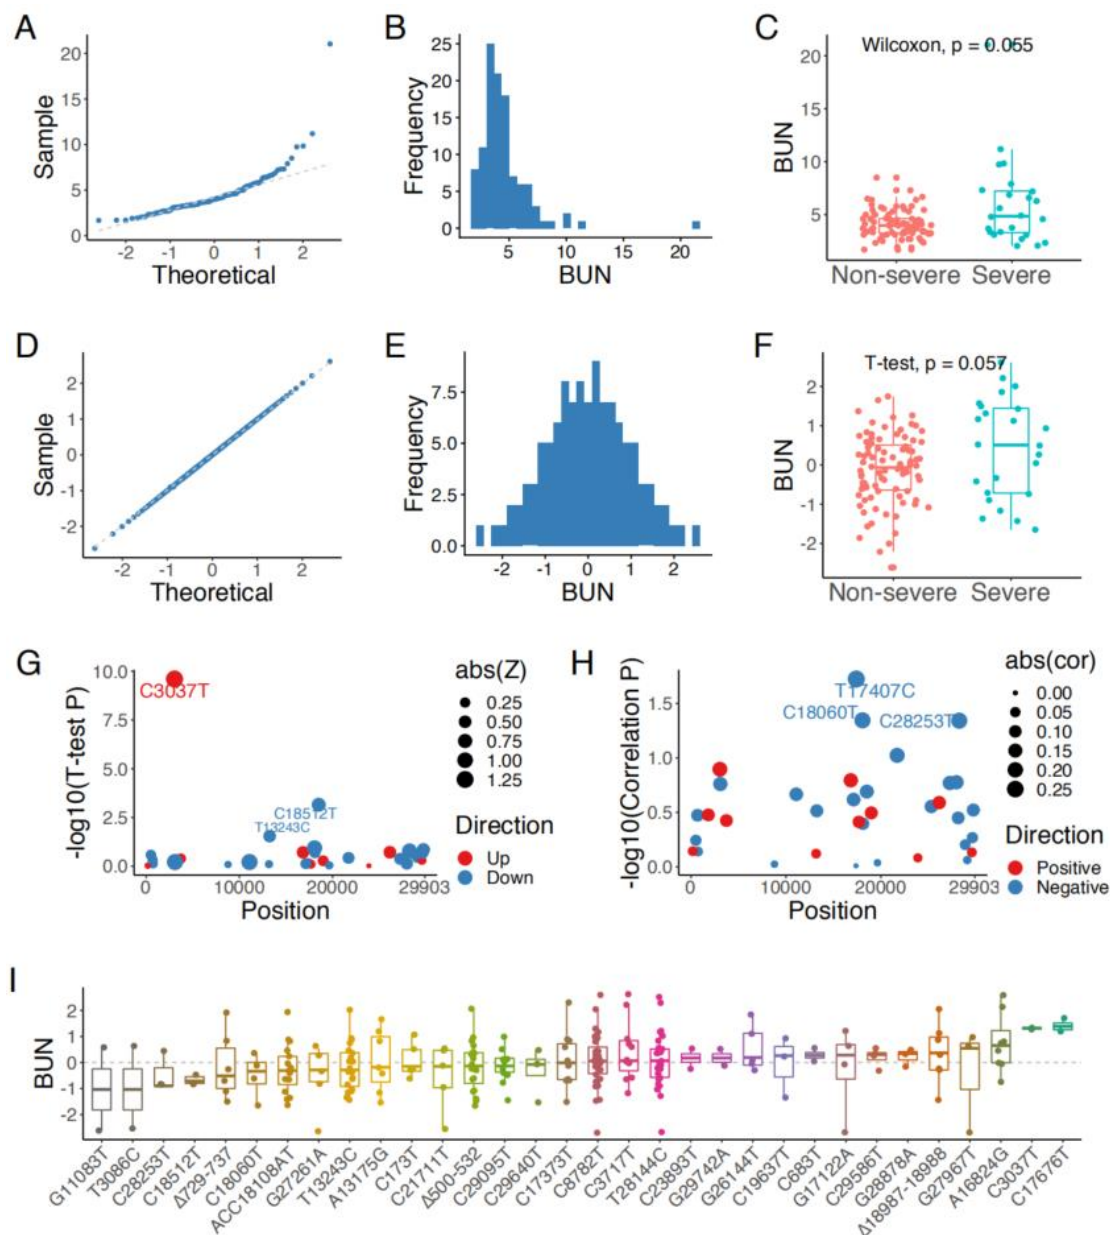

For BUN (blood urea nitrogen, mmol/L), quantile-quantile (QQ) plot and distribution plot before (A and B) and after normalization (D and E) were shown. We compared BUN in the non-severe and severe COVID-19 patients before (C,  $p = 0.055$ , Wilcoxon test) and after normalization (F,  $p = 0.057$ , T-test). We further performed association analyses between the 35 genetic variants and BUN using T-test and Pearson correlation. (G) Variants C3037T, C18512T and T13243C pass P value cut-off of 0.05 in T test. Red indicates higher mean value in cases with the variants and blue indicates higher mean value in cases without the variant. The size of symbols indicates absolute Z score number. (H) Variants T17407C, C18060T and C28253T have P value lower than 0.05 in Pearson correlation. Red and blue indicates positive and negative correlation, respectively. Size of the dots indicate absolute correlation coefficient. (I) After sorting Z score values of BUN, cases with C17676T and C3037T tend to have the highest Z score.

## 14. Ca<sup>2+</sup> (serum calcium)

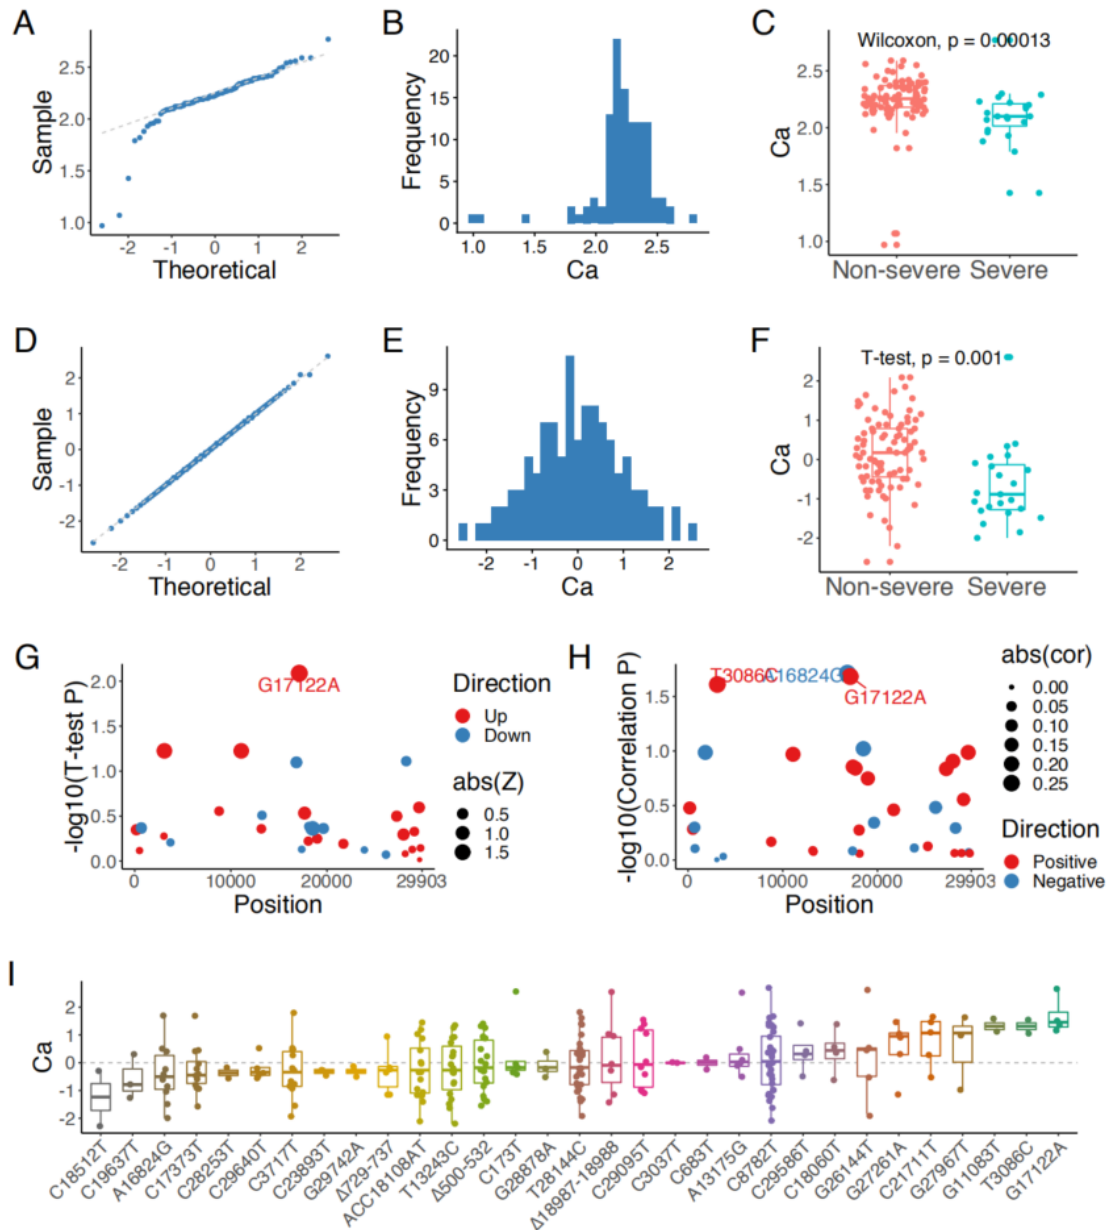

For Ca<sup>2+</sup> (serum calcium, mmol/L), quantile-quantile (QQ) plot and distribution plot before (A and B) and after normalization (D and E) were shown. We compared Ca<sup>2+</sup> in the non-severe and severe COVID-19 patients before (C,  $p = 1.3 \times 10^{-4}$ , Wilcoxon test) and after normalization (F,  $p = 1.0 \times 10^{-3}$ , T-test). (G) Variant G17122A passes P value cut-off of 0.05 in T test. Red indicates higher mean value in cases with the variants and blue indicates higher mean value in cases without the variant. The size of symbols indicates absolute Z score. (H) Variants A16824G, T3086C and G17122A have P value lower than 0.05 in Pearson correlation. Red and blue indicates positive and negative correlation, respectively. Size of the dots indicate absolute correlation coefficient. (I) After sorting Z score values of Ca<sup>2+</sup>, cases with G17122A, T3086C and G11083T have the highest Z score, whereas cases with C18512T has the lowest.

## 15. CD3 % (CD3 percentage)

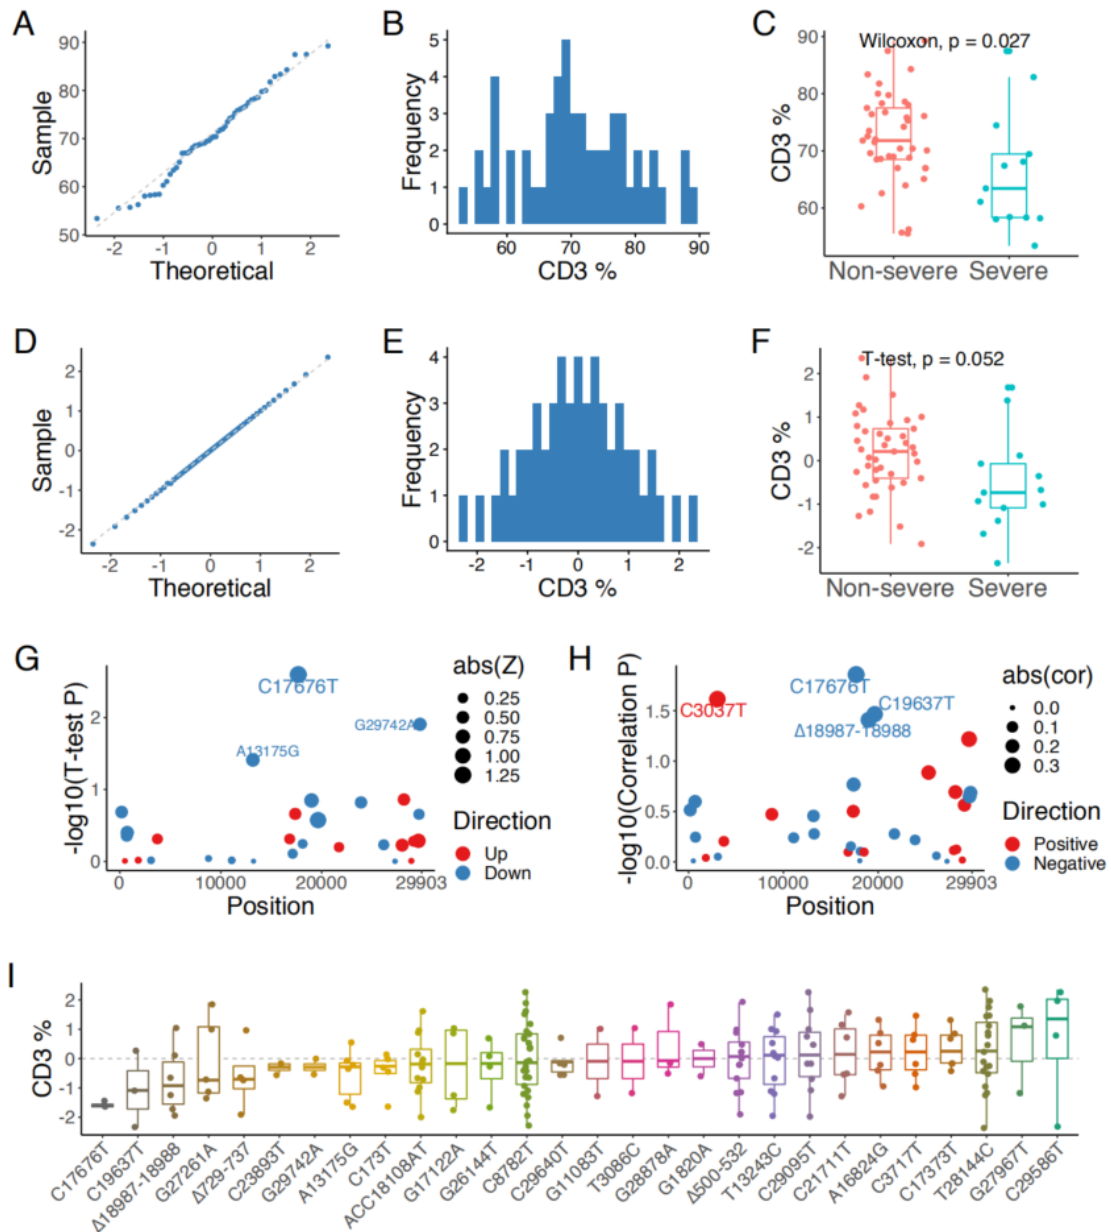

For CD3 % (CD3 percentage, %), quantile-quantile (QQ) plot and distribution plot before (A and B) and after normalization (D and E) were shown. We compared CD3 % in the non-severe and severe COVID-19 patients before (C,  $p = 0.027$ , Wilcoxon test) and after normalization (F,  $p = 0.052$ , T-test). We further performed association analyses between the 35 genetic variants and CD3 % using T-test and Pearson correlation. (G) Variants C17676T, G29742A and A13175G pass P value cut-off of 0.05 in T test. Red indicates higher mean value in cases with the variants and blue indicates higher mean value in cases without the variant. The size of symbols indicates absolute Z score number. (H) Variants C17676T, C3037T, C19637T and  $\Delta$ 18987-18988 have P value lower than 0.05 in Pearson correlation. Red and blue indicates positive and negative correlation, respectively. Size of the dots indicate absolute correlation coefficient. (I) After sorting Z score values of CD3 %, cases with C29586T tends to have the highest Z score, whereas cases with C17676T has the lowest.

## 16. CD3<sup>+</sup> (CD3<sup>+</sup> T cell count)

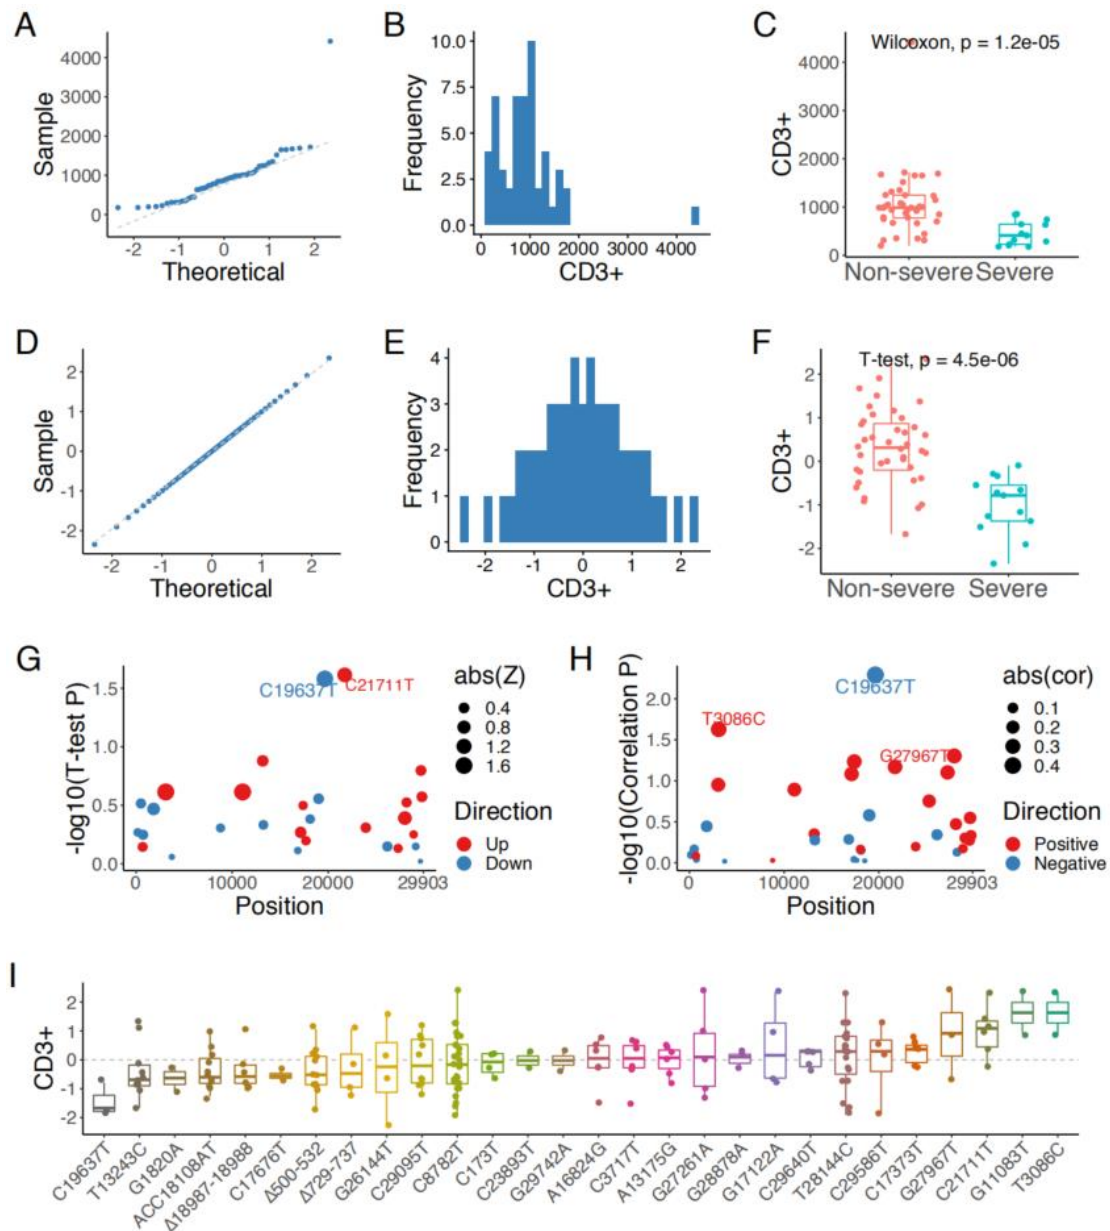

For CD3<sup>+</sup> (CD3<sup>+</sup> T cell count, cell/ $\mu$ l), quantile-quantile (QQ) plot and distribution plot before (**A** and **B**) and after normalization (**D** and **E**) were shown. We compared CD3<sup>+</sup> in the non-severe and severe COVID-19 patients before (**C**,  $p = 1.2 \times 10^{-5}$ , Wilcoxon test) and after normalization (**F**,  $p = 4.5 \times 10^{-6}$ , T-test). We further performed association analyses between the 35 genetic variants and CD3<sup>+</sup> using T-test and Pearson correlation. (**G**) Variants C19637T and C21711T pass P value cut-off of 0.05 in T test. Red indicates higher mean value in cases with the variants and blue indicates higher mean value in cases without the variant. The size of symbols indicates absolute Z score number. (**H**) Variants C19637T, T3086C and G27967T have P value lower than 0.05 in Pearson correlation. Red and blue indicates positive and negative correlation, respectively. Size of the dots indicate absolute correlation coefficient. (**I**) After sorting Z score values of CD3<sup>+</sup>, cases with T3086C and G11083T tend to have the highest Z score, whereas cases with C19637T has the lowest.

## 17. CD3<sup>+</sup> CD4<sup>+</sup> (CD3<sup>+</sup> CD4<sup>+</sup> count)

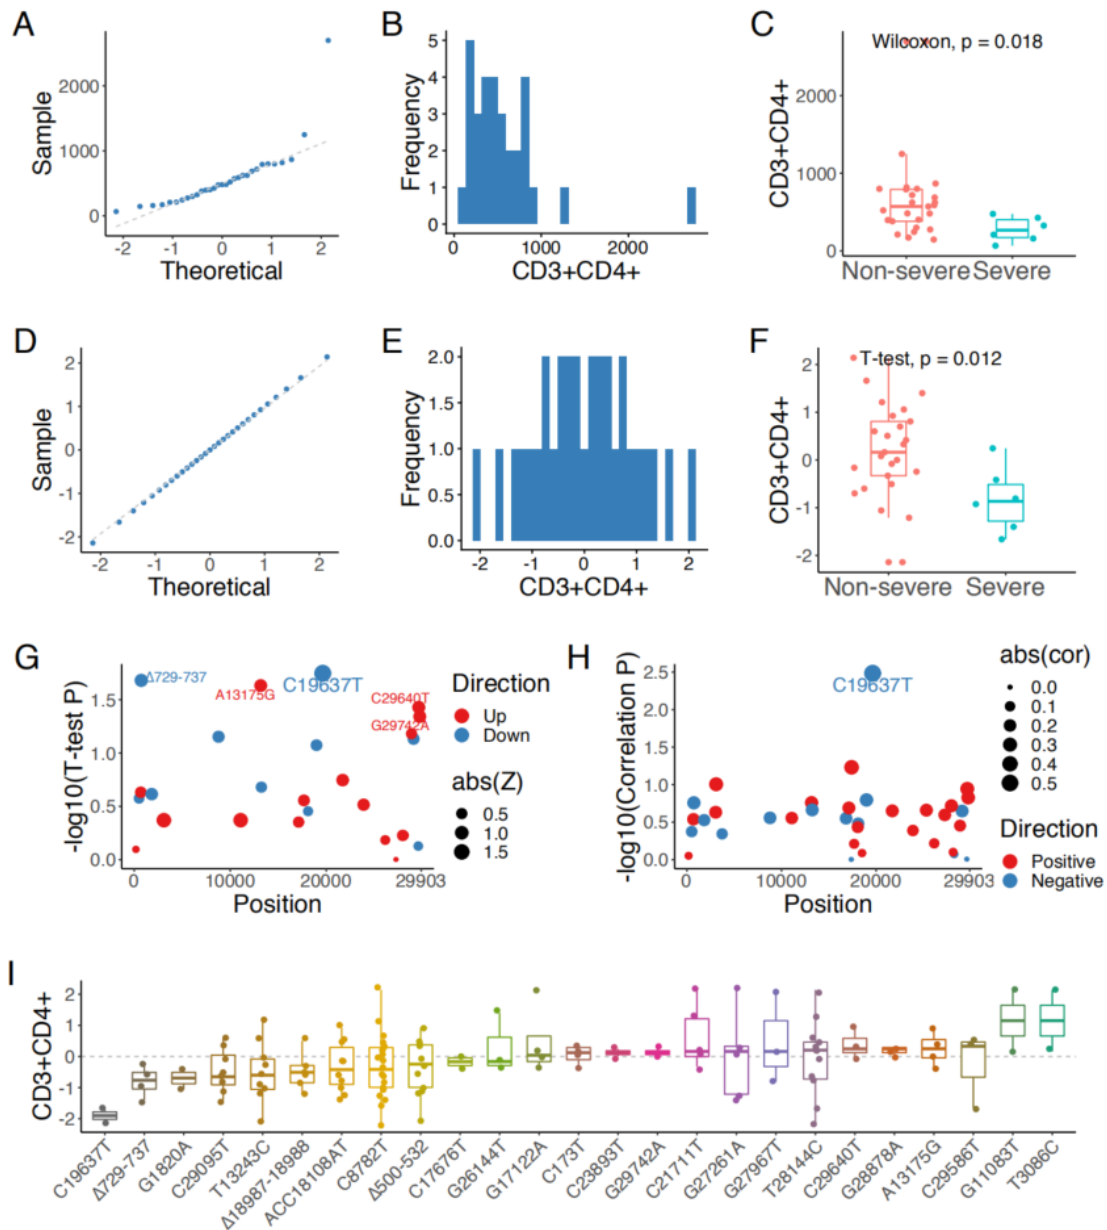

For CD3<sup>+</sup> CD4<sup>+</sup> (CD3<sup>+</sup> CD4<sup>+</sup> count,  $\times 10^9/L$ ), quantile-quantile (QQ) plot and distribution plot before (A and B) and after normalization (D and E) were shown. We compared CD3<sup>+</sup> CD4<sup>+</sup> in the non-severe and severe COVID-19 patients before (C,  $p = 0.018$ , Wilcoxon test) and after normalization (F,  $p = 0.012$ , T-test). We further performed association analyses between the 35 genetic variants and CD3<sup>+</sup> CD4<sup>+</sup> using T-test and Pearson correlation. (G) Variants  $\Delta 729-737$ , A13175G and C19637T et al pass P value cut-off of 0.05 in T test. Red indicates higher mean value in cases with the variants and blue indicates higher mean value in cases without the variant. The size of symbols indicates absolute Z score number. (H) Variant C19637T has P value lower than 0.05 in Pearson correlation. Red and blue indicates positive and negative correlation, respectively. Size of the dots indicate absolute correlation coefficient. (I) After sorting Z score values of CD3<sup>+</sup> CD4<sup>+</sup>, cases with T3086C and G11083T tend to have the highest Z score, whereas cases with C19637T and  $\Delta 729-737$  have the lowest.

## 18. CD3<sup>+</sup> CD4<sup>+</sup> % (CD3<sup>+</sup> CD4<sup>+</sup> percentage)

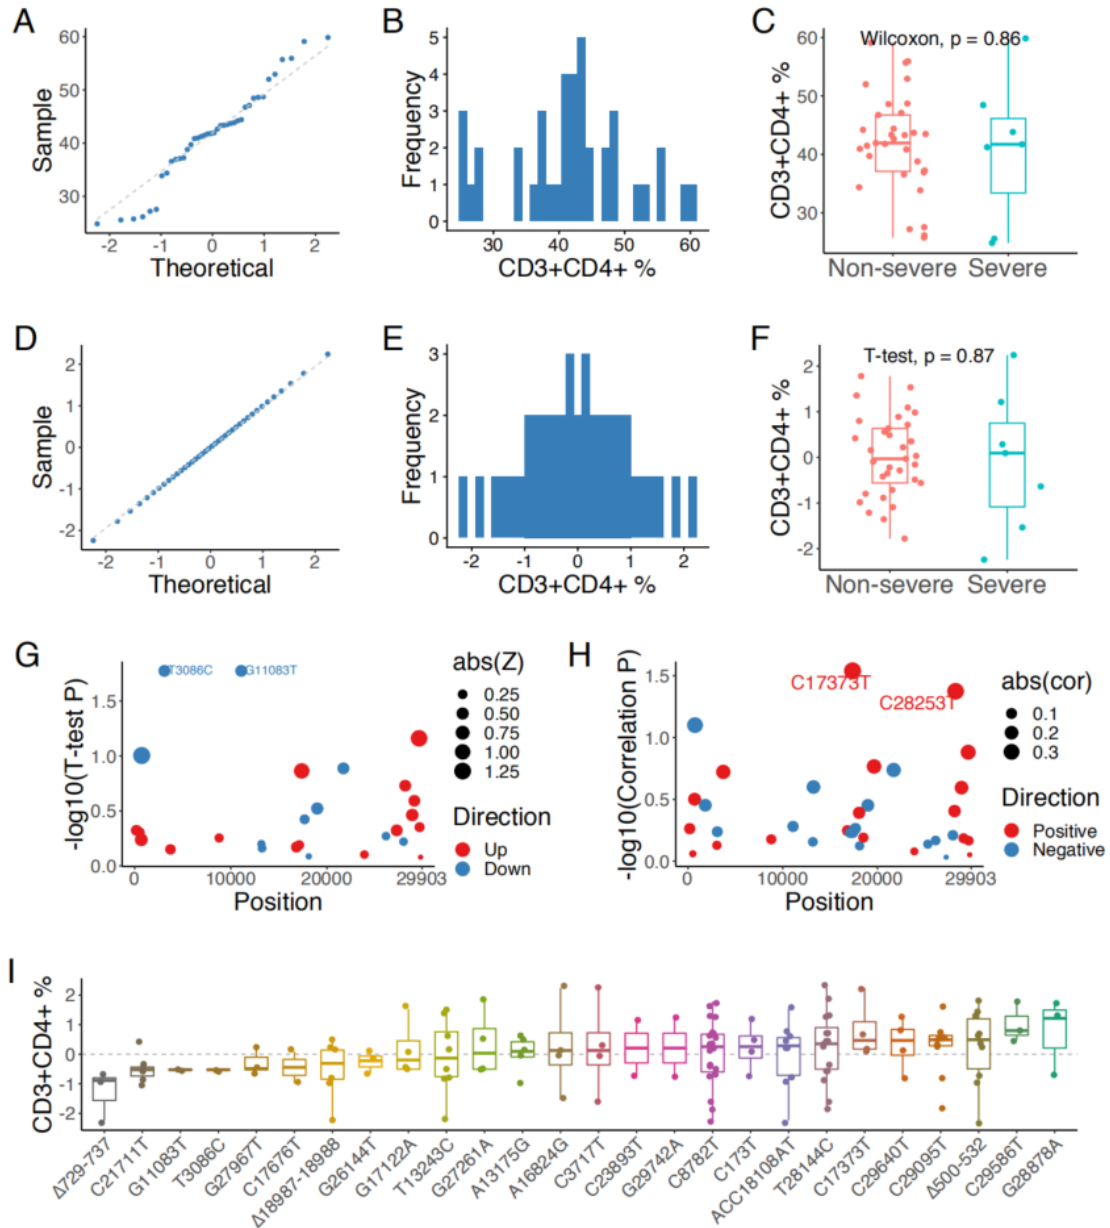

For CD3<sup>+</sup> CD4<sup>+</sup> % (CD3<sup>+</sup> CD4<sup>+</sup> percentage), quantile-quantile (QQ) plot and distribution plot before (A and B) and after normalization (D and E) were shown. We compared CD3<sup>+</sup> CD4<sup>+</sup> % in the non-severe and severe COVID-19 patients before (C,  $p = 0.86$ , Wilcoxon test) and after normalization (F,  $p = 0.87$ , T-test). (G) Variants T3086C and G11083T pass P value cut-off of 0.05 in T test. Red indicates higher mean value in cases with the variants and blue indicates higher mean value in cases without the variant. The size of symbols indicates absolute Z score number. (H) Variants C17373T and C28253T have P value lower than 0.05 in Pearson correlation. Red and blue indicates positive and negative correlation, respectively. Size of the dots indicate absolute correlation coefficient. (I) After sorting Z score values of CD3<sup>+</sup> CD4<sup>+</sup> %, cases with G28878A and C29586T tend to have the highest Z score, whereas cases with  $\Delta$ 729-737 and C21711T have the lowest.

## 19. CD3<sup>+</sup> CD8<sup>+</sup> (CD3<sup>+</sup> CD8<sup>+</sup> count)

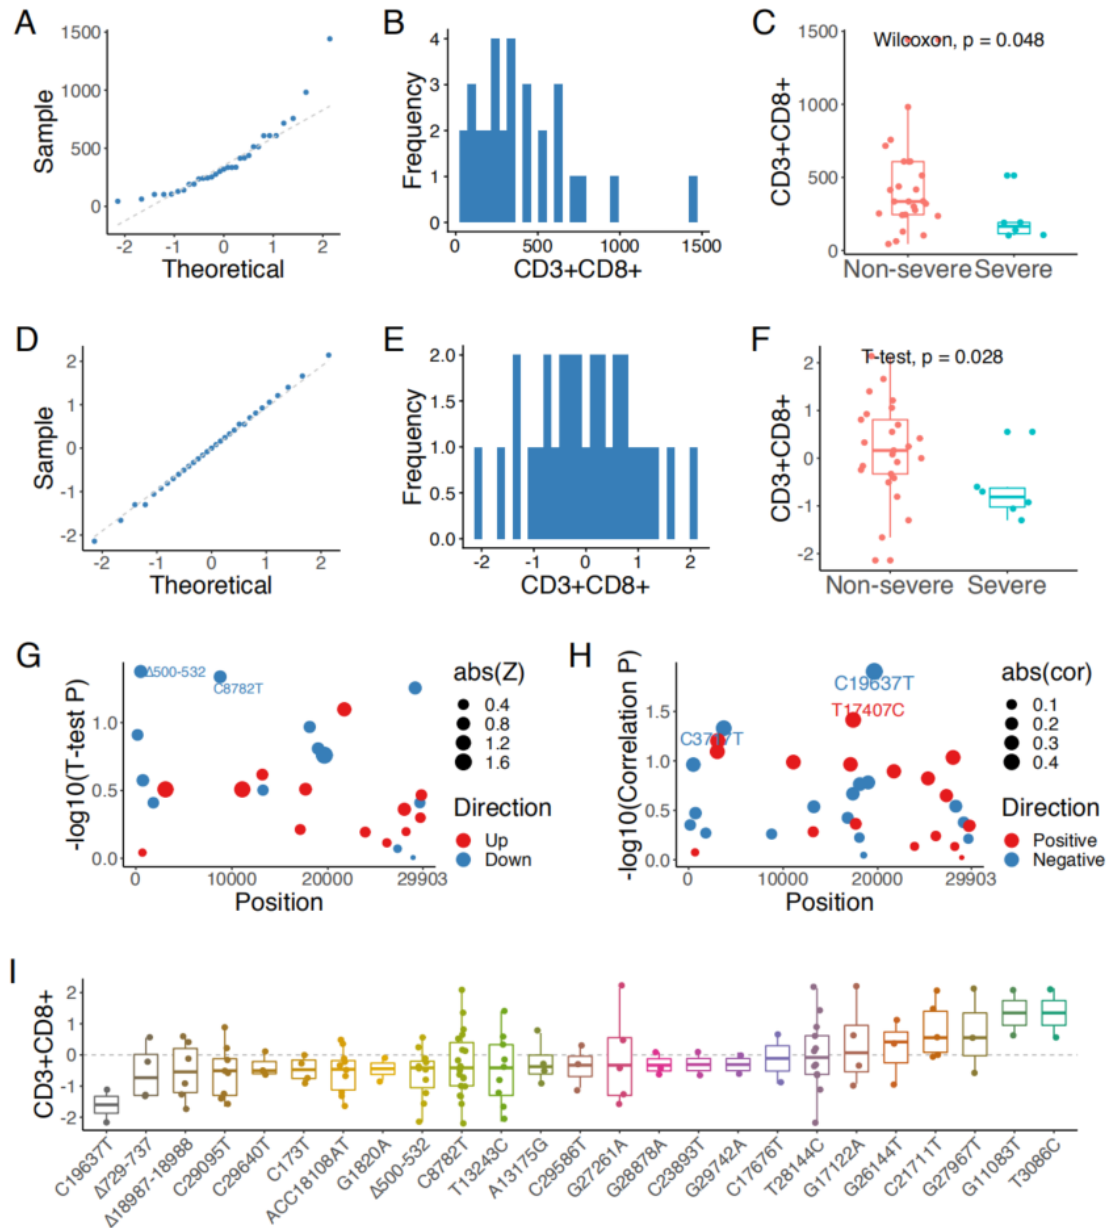

For CD3<sup>+</sup> CD8<sup>+</sup> (CD3<sup>+</sup> CD8<sup>+</sup> count,  $\times 10^9/\text{L}$ ), quantile-quantile (QQ) plot and distribution plot before (A and B) and after normalization (D and E) were shown. We compared CD3<sup>+</sup> CD8<sup>+</sup> in the non-severe and severe COVID-19 patients before (C,  $p = 0.048$ , Wilcoxon test) and after normalization (F,  $p = 0.028$ , T-test). We further performed association analyses between the 35 genetic variants and CD3<sup>+</sup> CD8<sup>+</sup> using T-test and Pearson correlation. (G) Variants  $\Delta 500-532$  and C8782T pass P value cut-off of 0.05 in T test. Red indicates higher mean value in cases with the variants and blue indicates higher mean value in cases without the variant. The size of symbols indicates absolute Z score number. (H) Variants C19637T, T17407C and C3717T have P value lower than 0.05 in Pearson correlation. Red and blue indicates positive and negative correlation, respectively. Size of the dots indicate absolute correlation coefficient. (I) After sorting Z score values of CD3<sup>+</sup> CD8<sup>+</sup>, cases with T3086C and G11083T tend to have the highest Z score, whereas cases with C19637T and  $\Delta 729-737$  to have the lowest.

## 20. CD3<sup>+</sup> CD8<sup>+</sup> % (CD3<sup>+</sup> CD8<sup>+</sup> percentage)

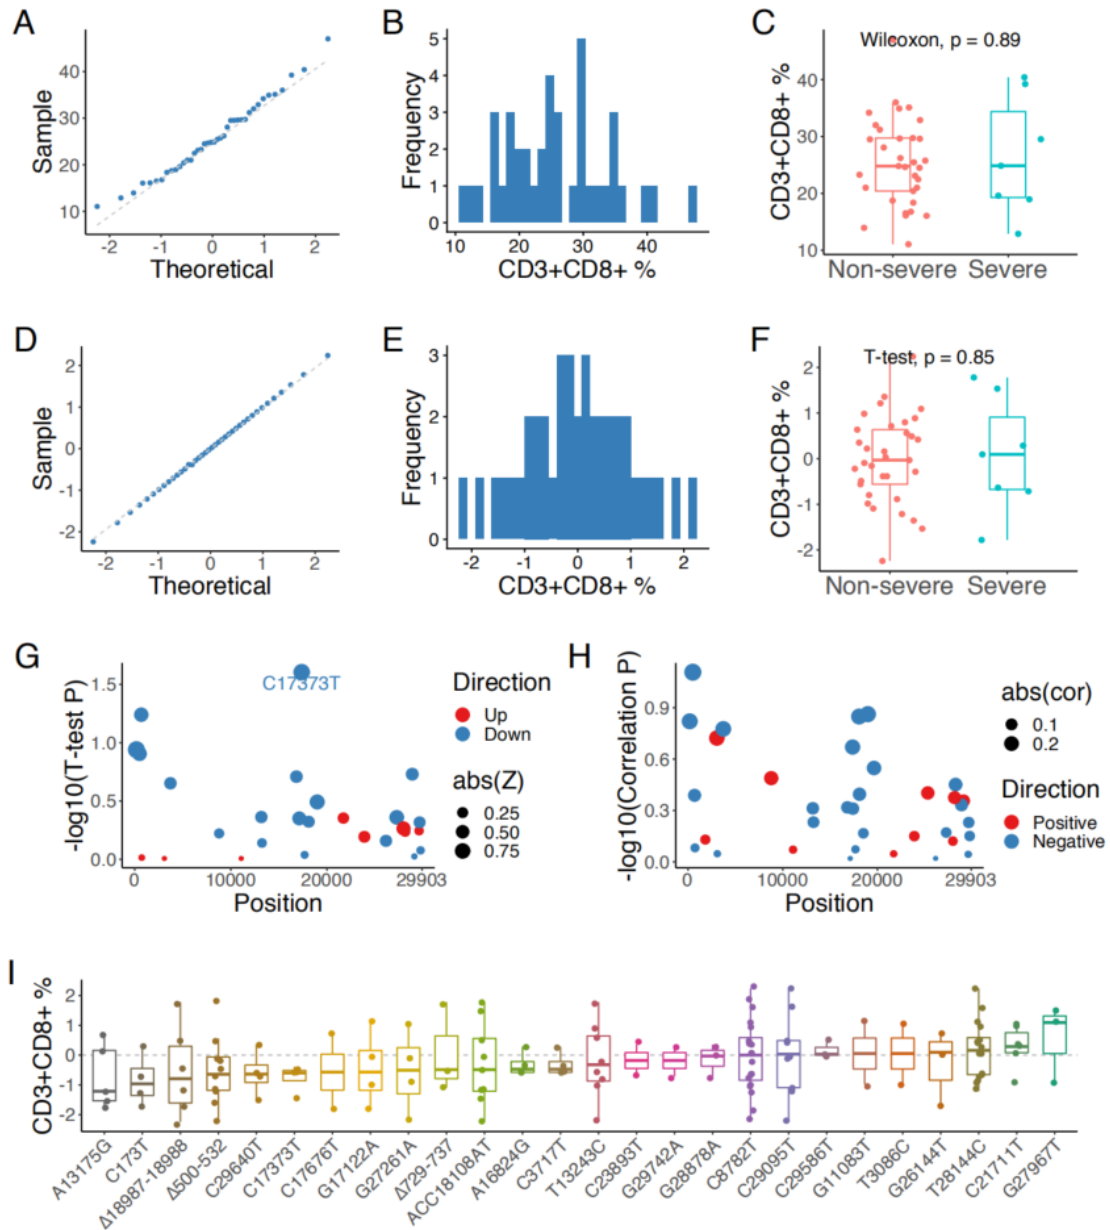

For CD3<sup>+</sup> CD8<sup>+</sup> % (CD3<sup>+</sup> CD8<sup>+</sup> percentage), quantile-quantile (QQ) plot and distribution plot before (A and B) and after normalization (D and E) were shown. We compared CD3<sup>+</sup> CD8<sup>+</sup> % in the non-severe and severe COVID-19 patients before (C,  $p = 0.89$ , Wilcoxon test) and after normalization (F,  $p = 0.85$ , T-test). We further performed association analyses between the 35 genetic variants and CD3<sup>+</sup> CD8<sup>+</sup> % using T-test and Pearson correlation. (G) Variant C17373T passes P value cut-off of 0.05 in T test. Red indicates higher mean value in cases with the variants and blue indicates higher mean value in cases without the variant. The size of symbols indicates absolute Z score number. (H) No variant in Pearson correlation has P value below 0.05. After sorting Z score values of CD3<sup>+</sup> CD8<sup>+</sup> %, cases with G27967T and C21711T tend to have the highest Z score, whereas cases with A13175G and C173T have the lowest.



## 21. CD4/CD8 ratio (%)

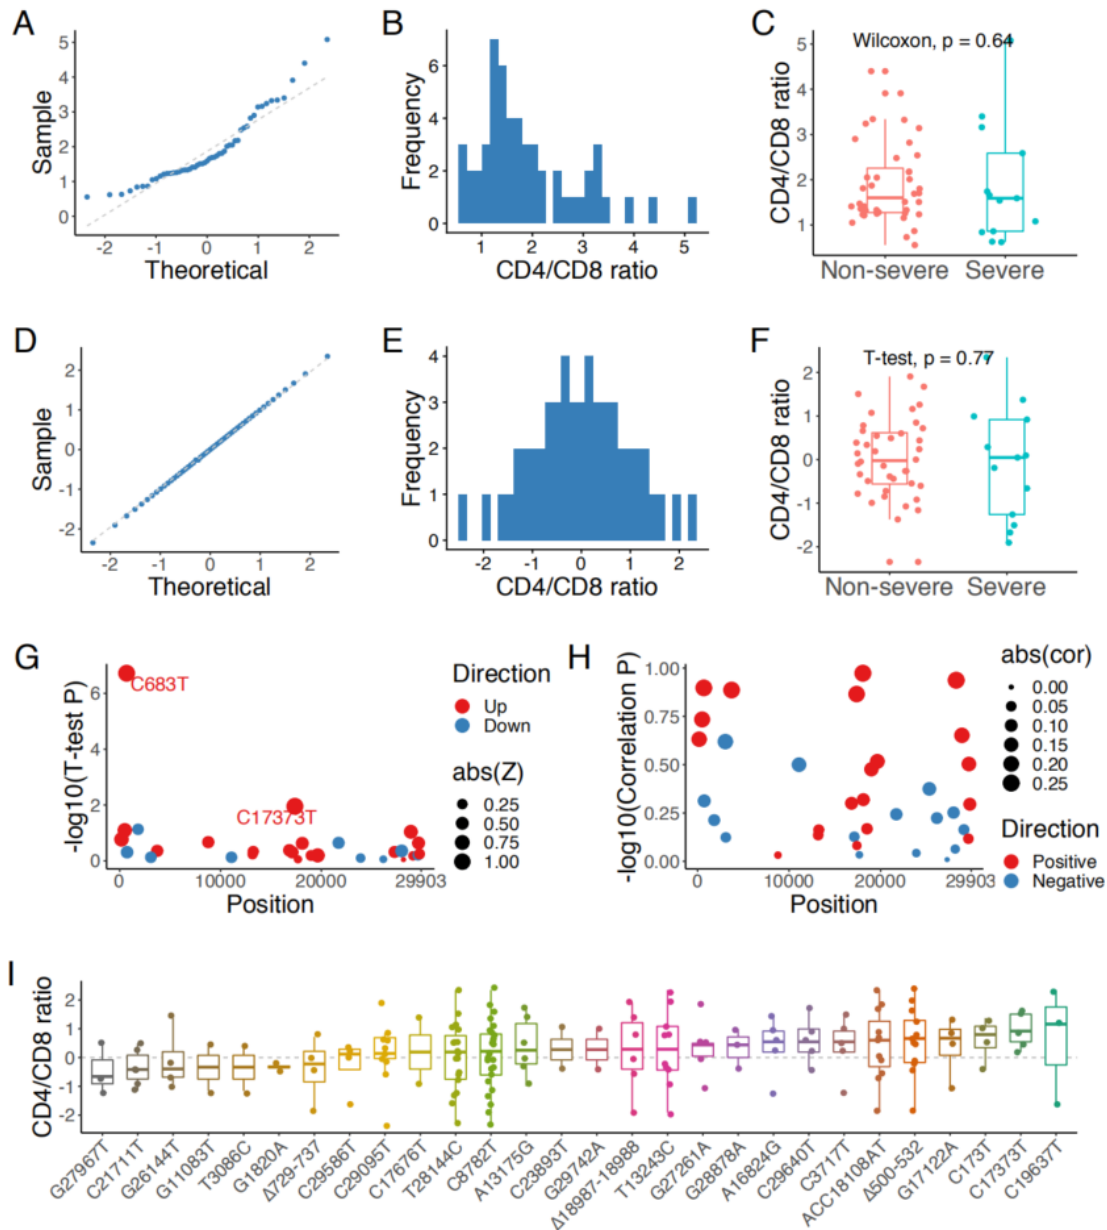

For CD4/CD8 ratio (%), quantile-quantile (QQ) plot and distribution plot before (A and B) and after normalization (D and E) were shown. We compared CD4/CD8 ratio in the non-severe and severe COVID-19 patients before (C,  $p = 0.64$ , Wilcoxon test) and after normalization (F,  $p = 0.77$ , T-test). We further performed association analyses between the 35 genetic variants and CD4/CD8 ratio using T-test and Pearson correlation. (G) Variants C683T and C17373T pass P value cut-off of 0.05 in T test. Red indicates higher mean value in cases with the variants and blue indicates higher mean value in cases without the variant. The size of symbols indicates absolute Z score number. (H) No variant has P value lower than 0.05 in Pearson correlation. Red and blue indicates positive and negative correlation, respectively. Size of the dots indicate absolute correlation coefficient. (I) After sorting Z score values of CD4/CD8 ratio, cases with C19637T and C17373T tend to have the highest Z score, whereas cases with G27967T and C21711T have the lowest.

## 22. CD4<sup>+</sup> (CD4 absolute count)

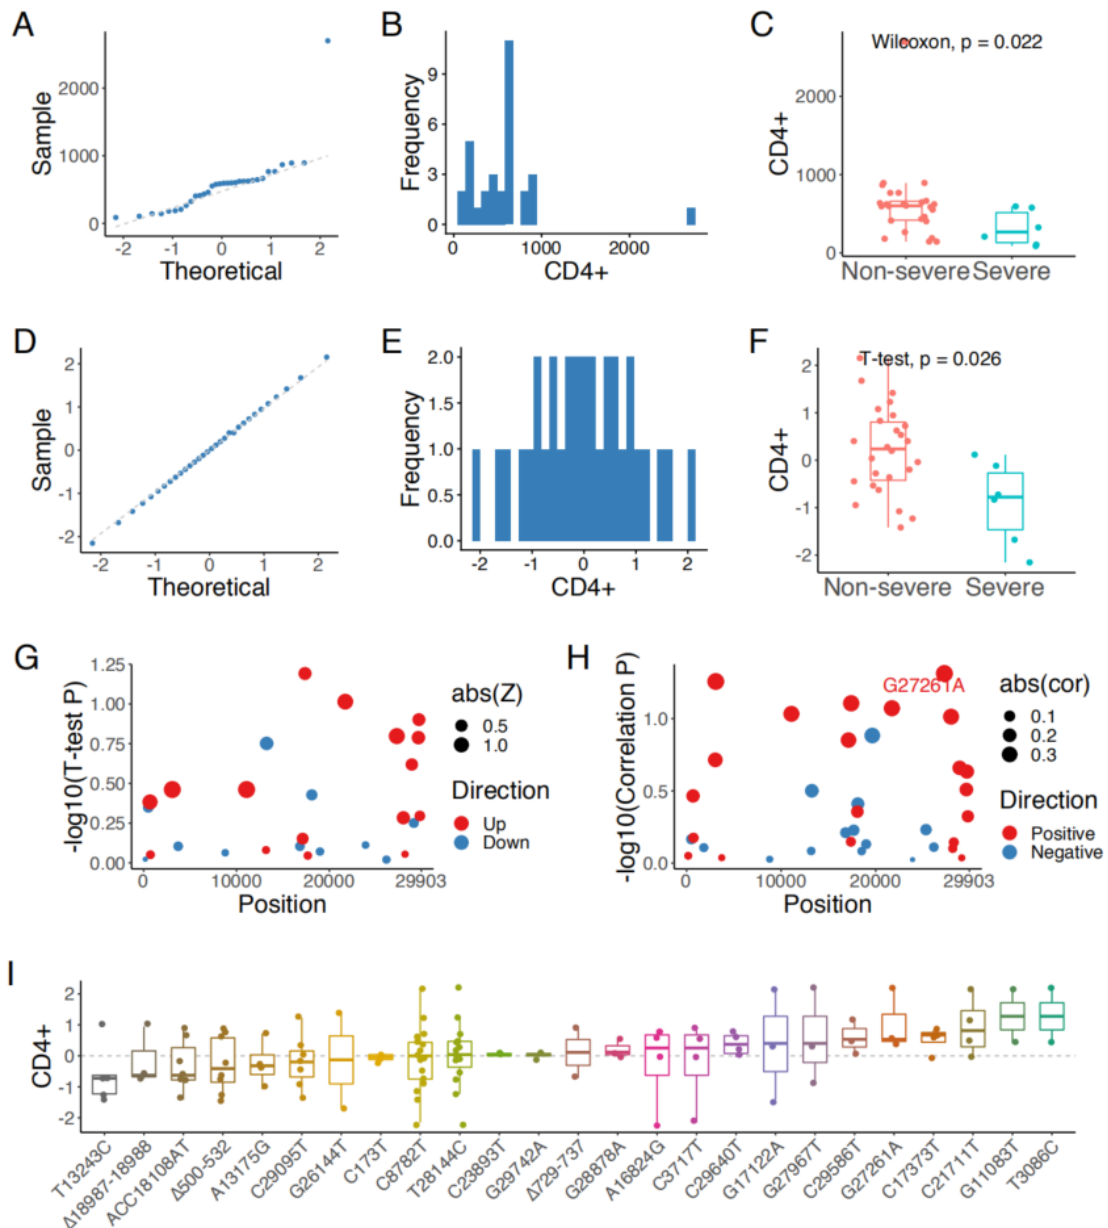

For CD4<sup>+</sup> (CD4 absolute count, cell/ $\mu$ l), quantile-quantile (QQ) plot and distribution plot before (A and B) and after normalization (D and E) were shown. We compared CD4<sup>+</sup> in the non-severe and severe COVID-19 patients before (C,  $p = 0.022$ , Wilcoxon test) and after normalization (F,  $p = 0.026$ , T-test). We further performed association analyses between the 35 genetic variants and CD4<sup>+</sup> using T-test and Pearson correlation. (G) No variant passes P value cut-off of 0.05 in T test. Red indicates higher mean value in cases with the variants and blue indicates higher mean value in cases without the variant. The size of symbols indicates absolute Z score number. (H) Variant G27261A in Pearson correlation was with P value below 0.05. After sorting Z score values of CD4<sup>+</sup>, cases with T3086C and G11083T tend to have the highest Z score, whereas cases with T13243C and  $\Delta$ 18987-18988 have the lowest.

### 23. CD8<sup>+</sup> (CD8 absolute count)

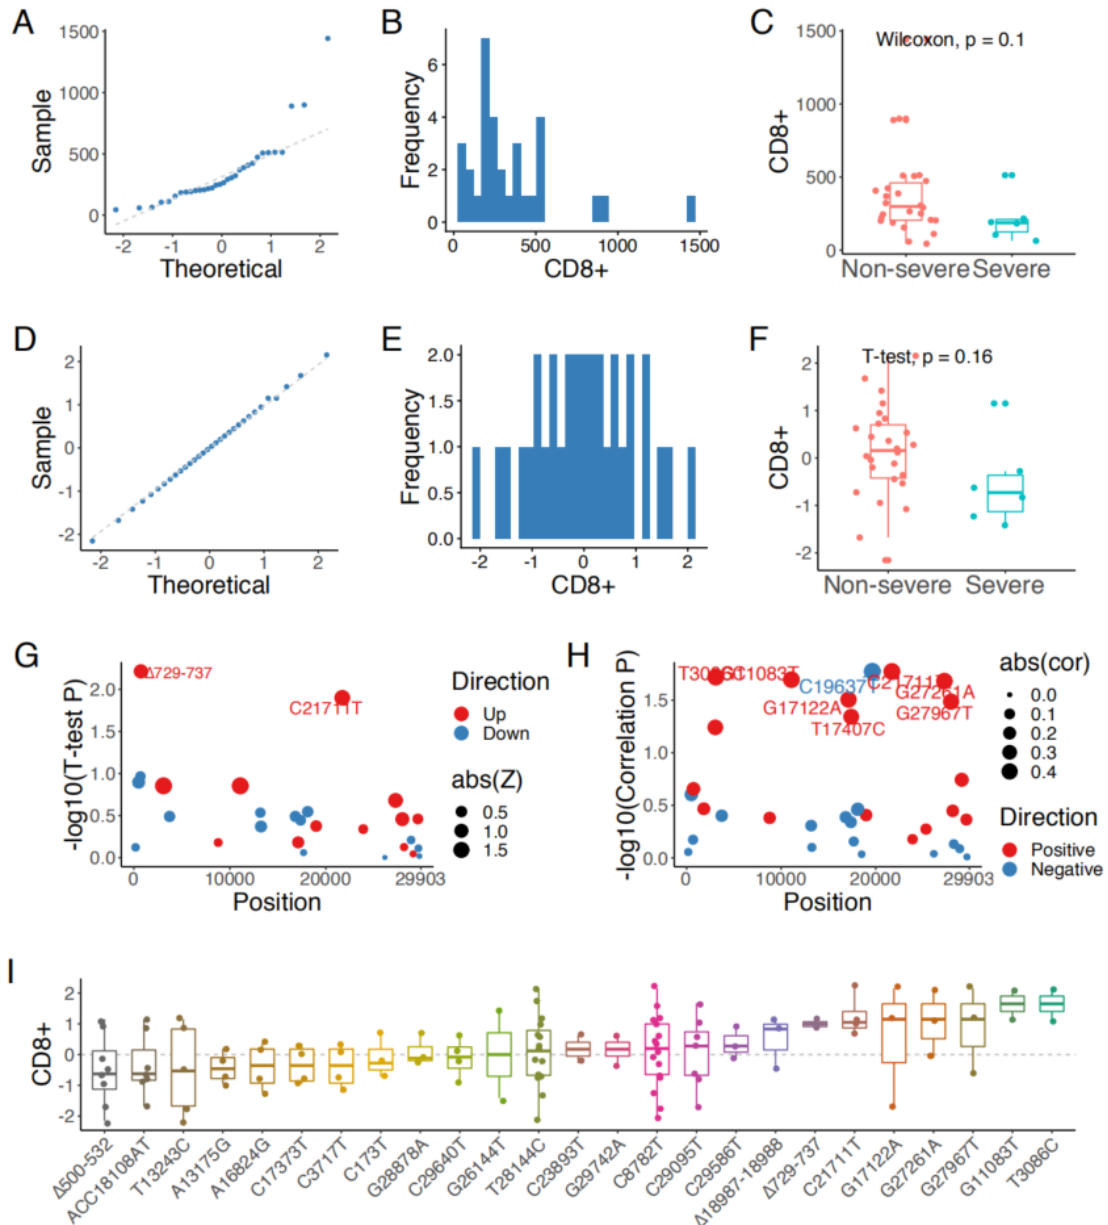

For CD8<sup>+</sup> (CD8 absolute count, cell/ $\mu$ l), quantile-quantile (QQ) plot and distribution plot before (A and B) and after normalization (D and E) were shown. We compared CD8<sup>+</sup> in the non-severe and severe COVID-19 patients before (C,  $p = 0.1$ , Wilcoxon test) and after normalization (F,  $p = 0.16$ , T-test). We further performed association analyses between the 35 genetic variants and CD8<sup>+</sup> using T-test and Pearson correlation. (G) Variants  $\Delta 729-737$  and C21711T pass P value cut-off of 0.05 in T test. Red indicates higher mean value in cases with the variants and blue indicates higher mean value in cases without the variant. The size of symbols indicates absolute Z score number. (H) Variants C19637T, G11083T and T3086C et al have P value lower than 0.05 in Pearson correlation. Red and blue indicates positive and negative correlation, respectively. Size of the dots indicate absolute correlation coefficient. (I) After sorting Z score values of CD8<sup>+</sup>, cases with T3086C and G11083T tend to have the highest Z score, whereas cases with  $\Delta 500-532$  and ACC18108AT have the lowest.

## 24. CHOL (cholesterol)

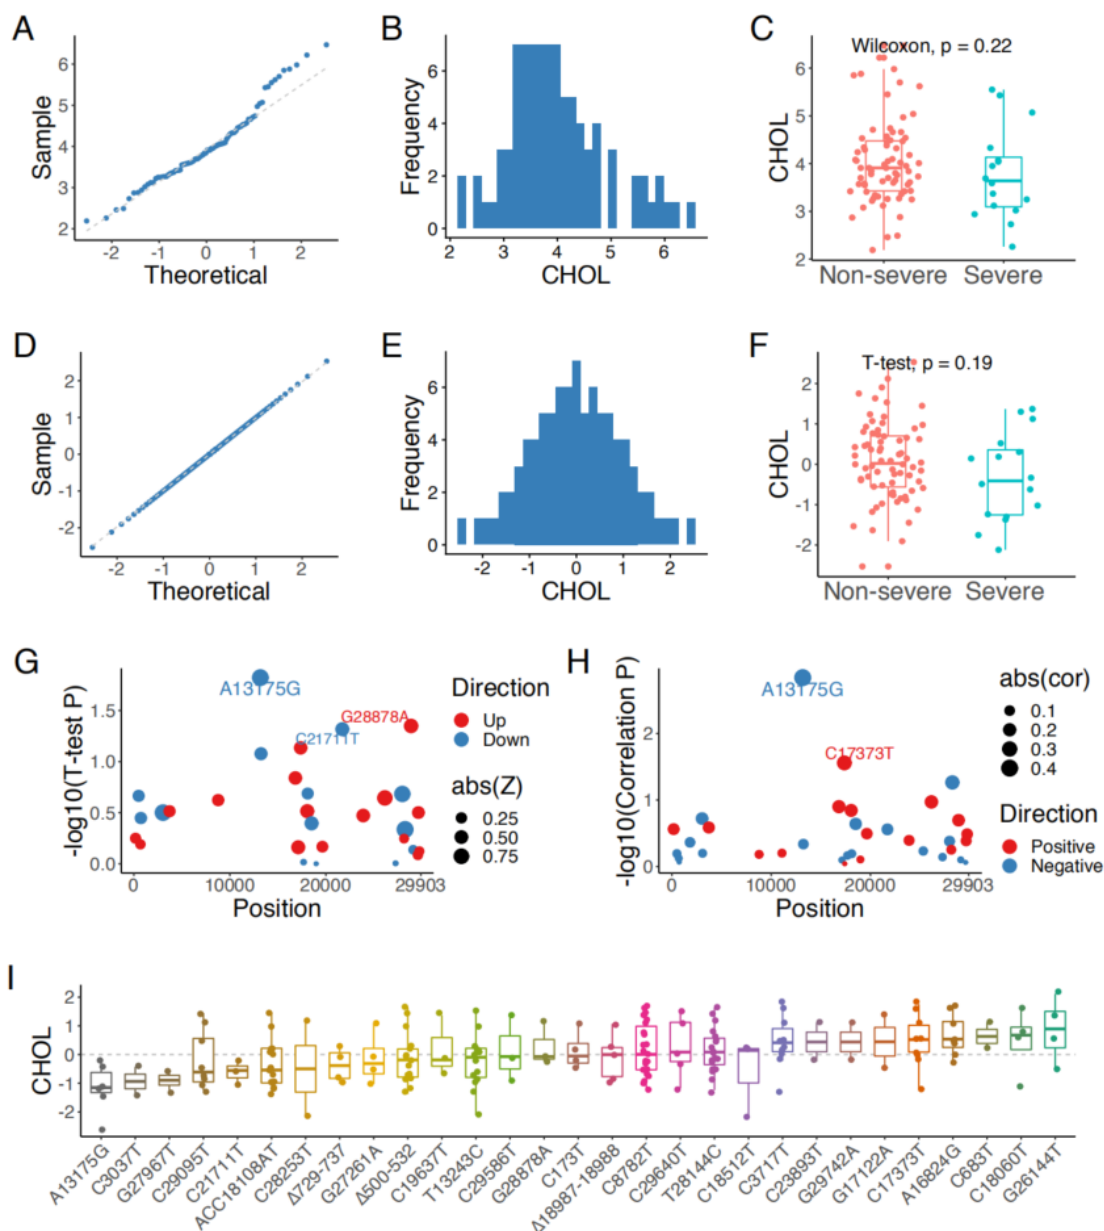

For CHOL (cholesterol, mmol/L), quantile-quantile (QQ) plot and distribution plot before (A and B) and after normalization (D and E) were shown. We compared CHOL in the non-severe and severe COVID-19 patients before (C,  $p = 0.22$ , Wilcoxon test) and after normalization (F,  $p = 0.19$ , T-test). We further performed association analyses between the 35 genetic variants and CHOL using T-test and Pearson correlation. (G) Variants A13175G, G28878A and C21711T pass P value cut-off of 0.05 in T test. Red indicates higher mean value in cases with the variants and blue indicates higher mean value in cases without the variant. The size of symbols indicates absolute Z score number. (H) Variants A13175G and C17373T have P value lower than 0.05 in Pearson correlation. Red and blue indicates positive and negative correlation, respectively. Size of the dots indicate absolute correlation coefficient. (I) After sorting Z score values of CHOL, cases with G26144T and C18060T tend to have the highest Z score, whereas cases with A13175G and C3037T have the lowest.

## 25. CK (creatine kinase)

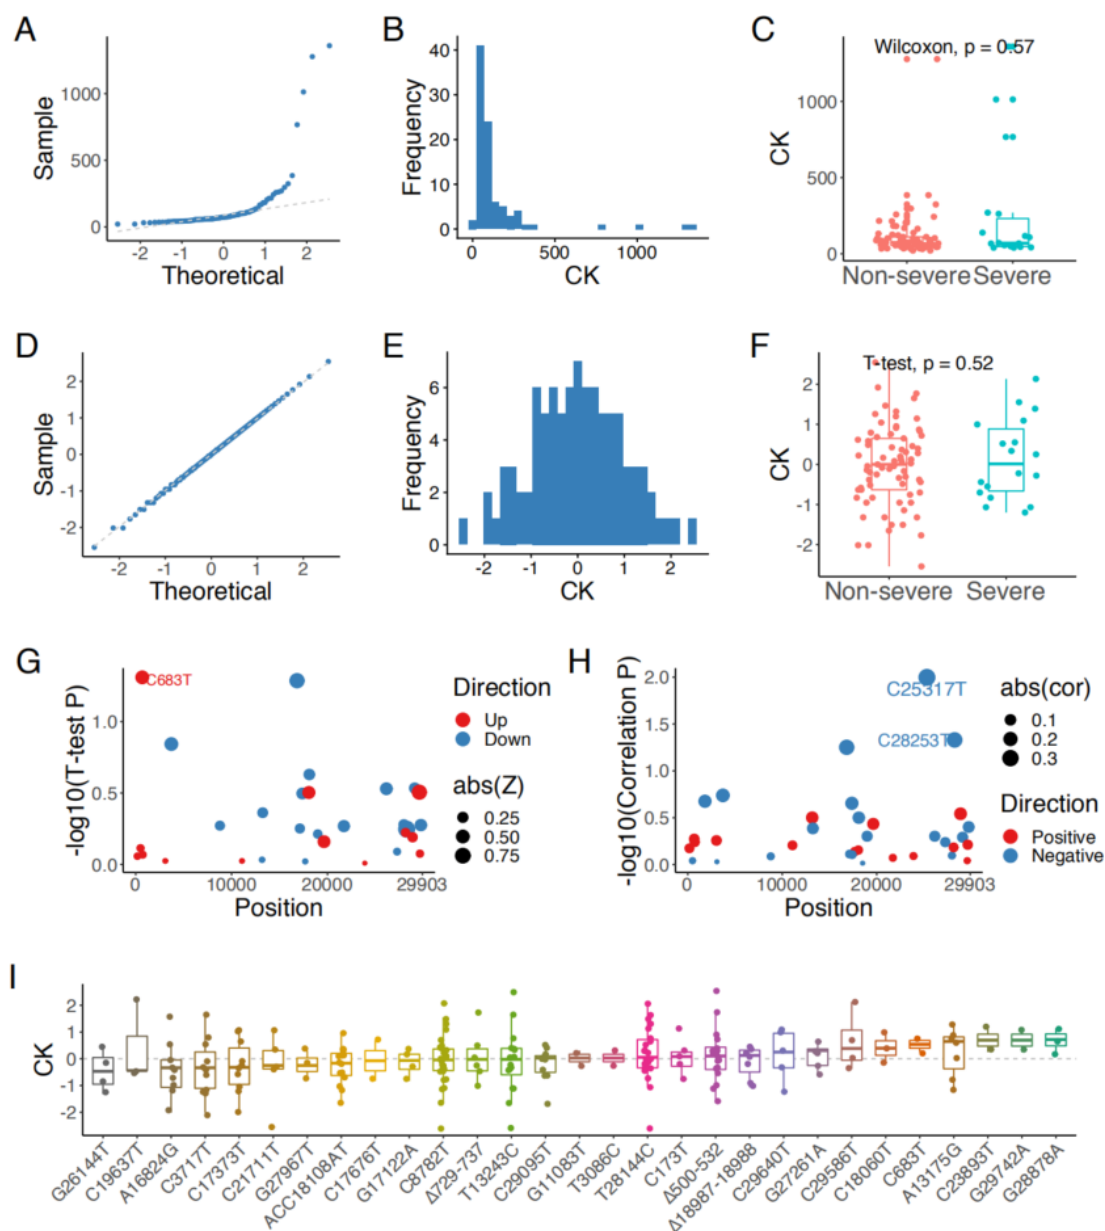

For CK (creatine kinase, U/L), quantile-quantile (QQ) plot and distribution plot before (**A** and **B**) and after normalization (**D** and **E**) were shown. We compared CK in the non-severe and severe COVID-19 patients before (**C**,  $p = 0.57$ , Wilcoxon test) and after normalization (**F**,  $p = 0.52$ , T-test). We further performed association analyses between the 35 genetic variants and CK using T-test and Pearson correlation. (**G**) Variant C683T passes P value cut-off of 0.05 in T test. Red indicates higher mean value in cases with the variants and blue indicates higher mean value in cases without the variant. The size of symbols indicates absolute Z score number. (**H**) Variants C25317T and C28253T have P value lower than 0.05 in Pearson correlation. Red and blue indicates positive and negative correlation, respectively. Size of the dots indicate absolute correlation coefficient. (**I**) After sorting Z score values of CK, cases with G28878A and G29742A tend to have the highest Z score, whereas cases with G26144T and C19637T have the lowest.

## 26. CK-MB (creatine kinase-MB)

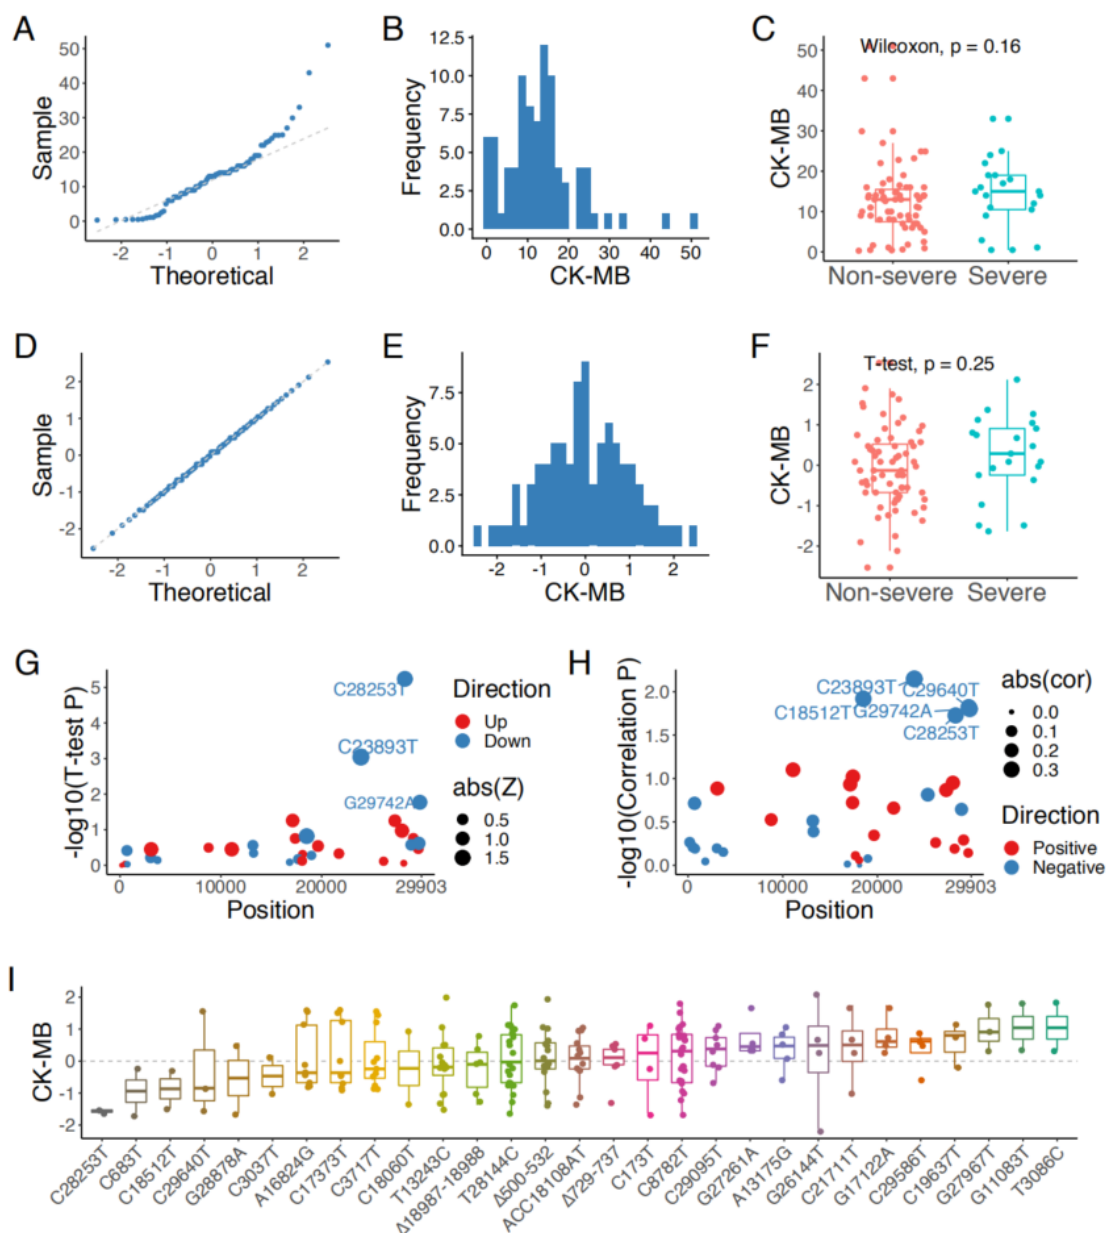

For CK-MB (creatine kinase-MB, U/L), quantile-quantile (QQ) plot and distribution plot before (A and B) and after normalization (D and E) were shown. We compared CK-MB in the non-severe and severe COVID-19 patients before (C,  $p = 0.16$ , Wilcoxon test) and after normalization (F,  $p = 0.25$ , T-test). We further performed association analyses between the 35 genetic variants and CK-MB using T-test and Pearson correlation. (G) Variants C28253T, C23893T and G29742A pass P value cut-off of 0.05 in T test. Red indicates higher mean value in cases with the variants and blue indicates higher mean value in cases without the variant. The size of symbols indicates absolute Z score number. (H) Variants C23893T, C18512T and C29640T et al have P value lower than 0.05 in Pearson correlation. Red and blue indicates positive and negative correlation, respectively. Size of the dots indicate absolute correlation coefficient. (I) After sorting Z score values of CK-MB, cases with T3086C and G11083T tend to have the highest Z score, whereas cases with C28253T and C683T have the lowest.

## 27. Cl (chloride)

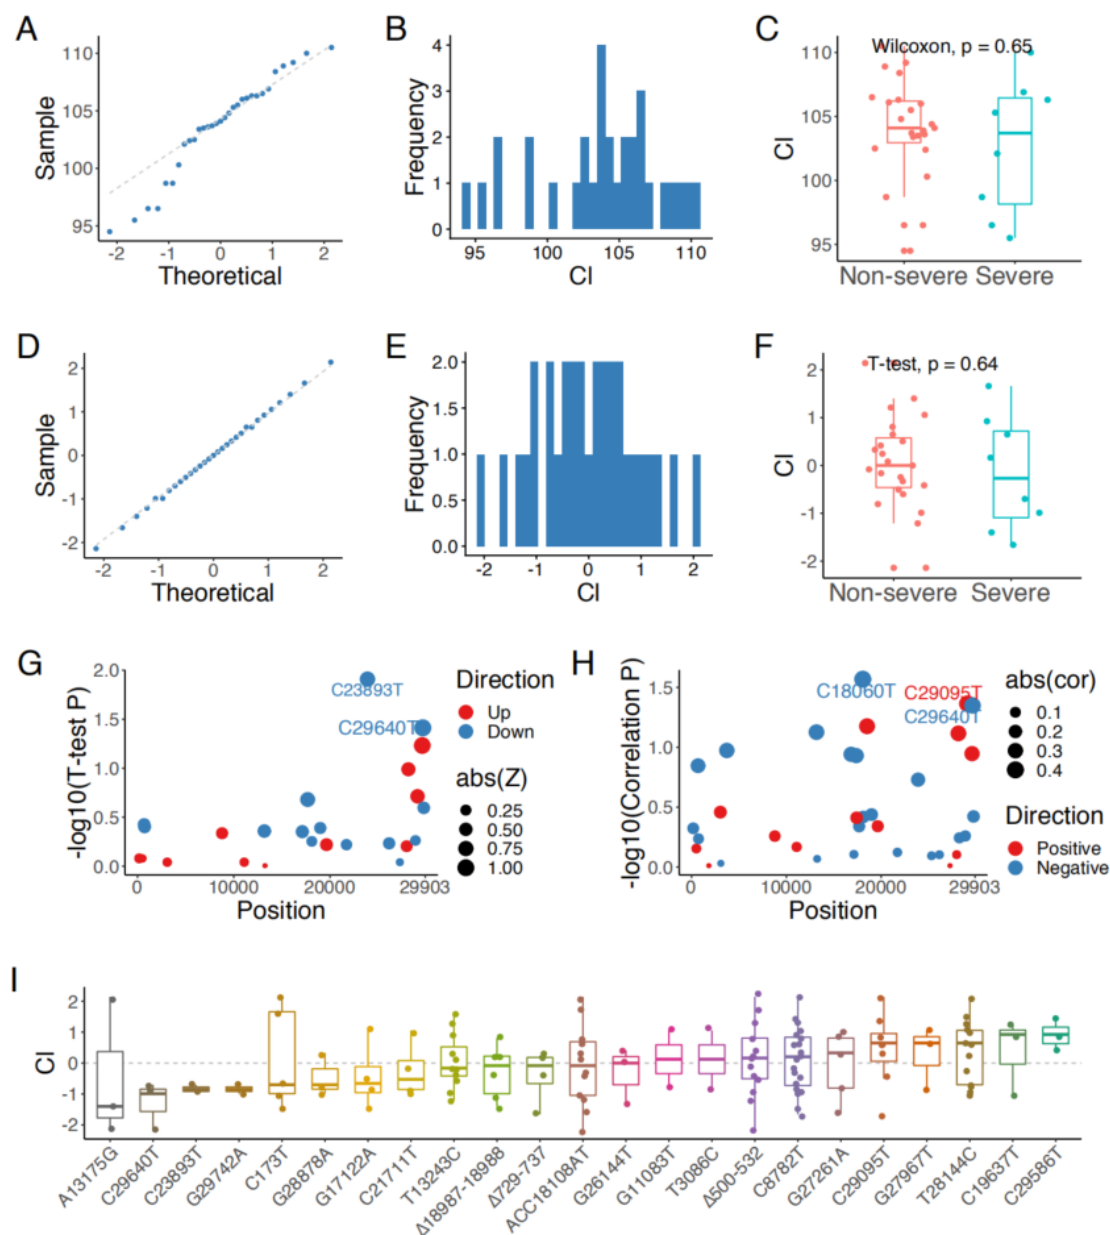

For Cl (chloride, mmol/L), quantile-quantile (QQ) plot and distribution plot before (**A** and **B**) and after normalization (**D** and **E**) were shown. We compared Cl in the non-severe and severe COVID-19 patients before (**C**,  $p = 0.65$ , Wilcoxon test) and after normalization (**F**,  $p = 0.64$ , T-test). (**G**) Variants C23893T and C29640T pass P value cut-off of 0.05 in T test. Red indicates higher mean value in cases with the variants and blue indicates higher mean value in cases without the variant. The size of symbols indicates absolute Z score number. (**H**) Variants C18060T, C29095T and C29640T have P value lower than 0.05 in Pearson correlation. Red and blue indicates positive and negative correlation, respectively. Size of the dots indicate absolute correlation coefficient. (**I**) After sorting Z score values of Cl, cases with C29586T and C19637T tend to have the highest Z score, whereas cases with A13175G and C29640T have the lowest.

## 28. Consolidation shadow percentage

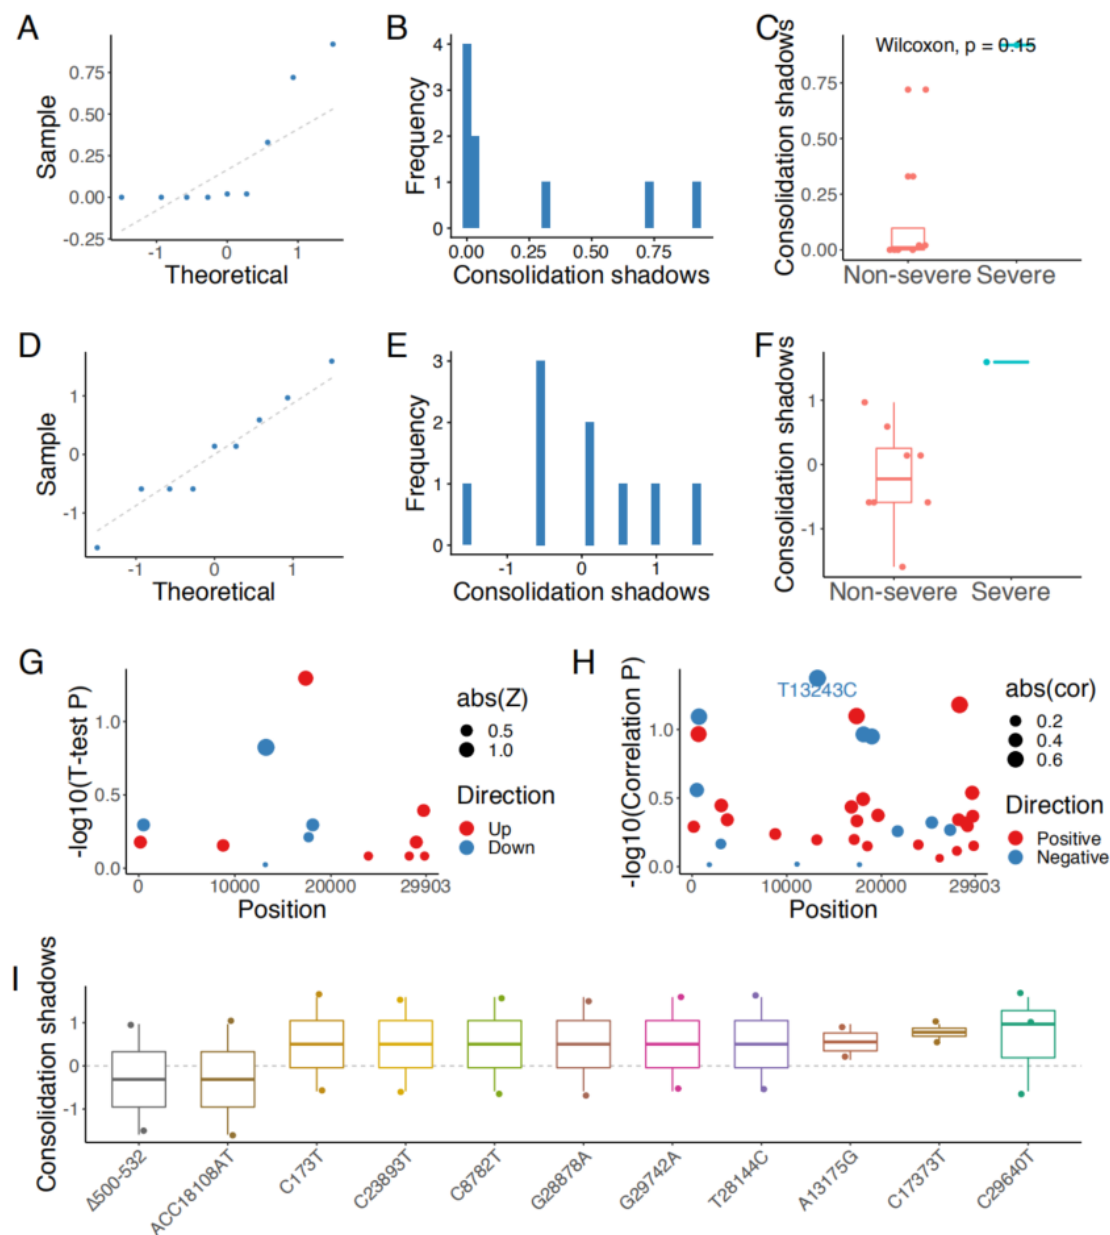

For Consolidation shadows percentage (%), quantile-quantile (QQ) plot and distribution plot before (A and B) and after normalization (D and E) were shown. We compared Consolidation shadows in the non-severe and severe COVID-19 patients before (C,  $p = 0.15$ , Wilcoxon test) and after normalization (F). (G) No variant passes P value cut-off of 0.05 in T test. Red indicates higher mean value in cases with the variants and blue indicates higher mean value in cases without the variant. The size of symbols indicates absolute Z score number. (H) Variant T13243C in Pearson correlation was with P value below 0.05 (H). After sorting Z score values of Consolidation shadows, cases with C29640T and C17373T tend to have the highest Z score, whereas cases with  $\Delta$ 500-532 and ACC18108AT have the lowest.



## 29. Consolidation shadows volume

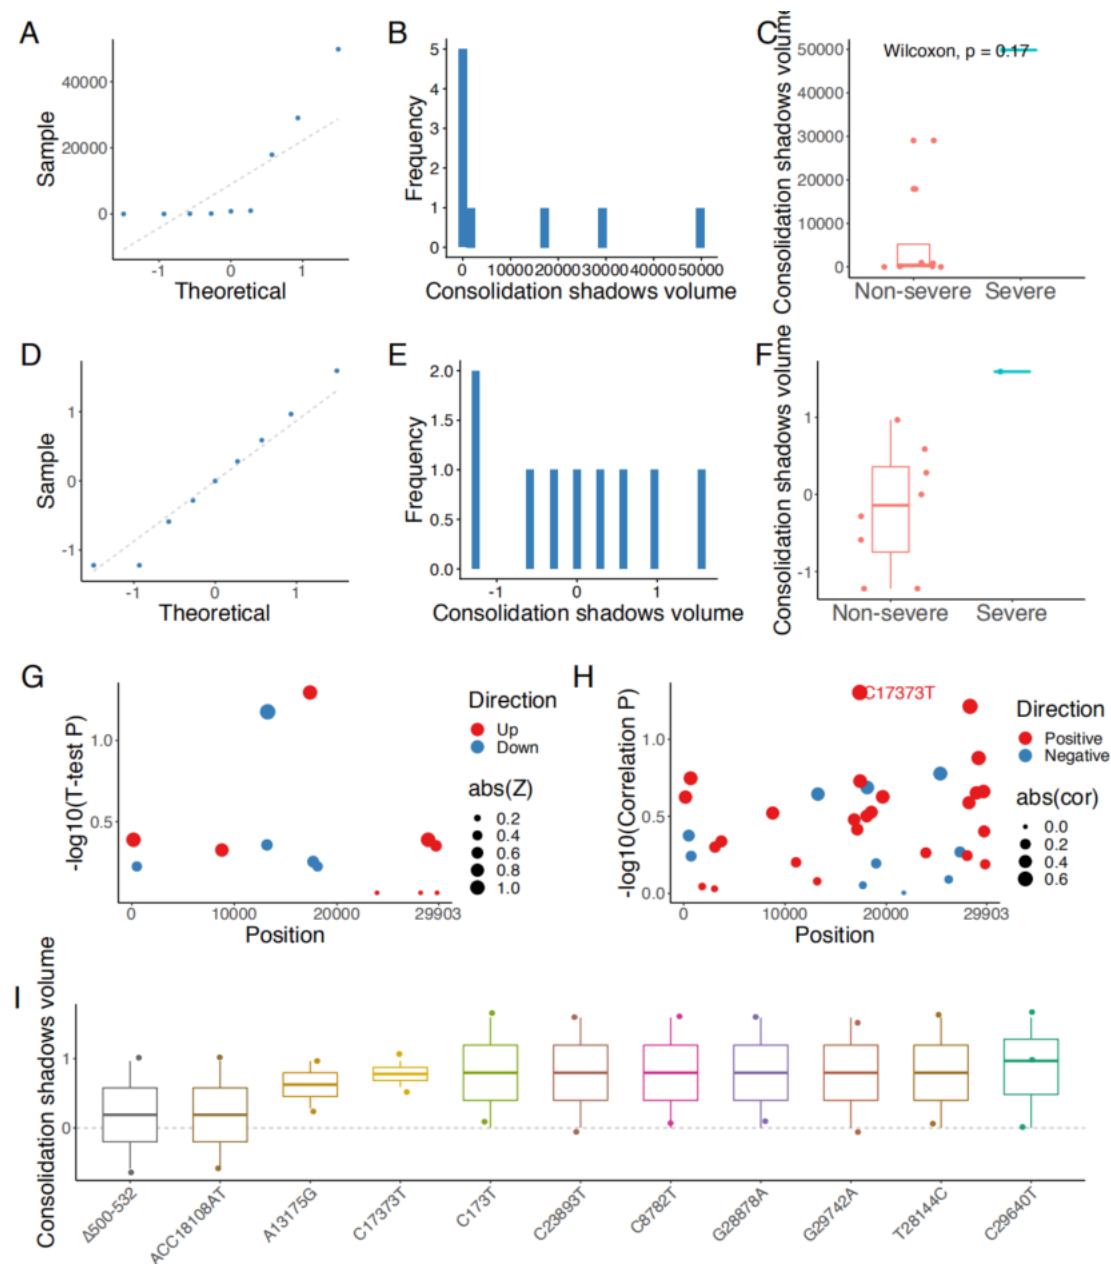

For Consolidation shadows volume (mm<sup>3</sup>), quantile-quantile (QQ) plot and distribution plot before (A and B) and after normalization (D and E) were shown. We compared Consolidation shadows volume in the non-severe and severe COVID-19 patients before (C,  $p = 0.17$ , Wilcoxon test) and after normalization (F). We further performed association analyses between the 35 genetic variants and Consolidation shadows volume using T-test and Pearson correlation. (G) No variant passes P value cut-off of 0.05 in T test. Red indicates higher mean value in cases with the variants and blue indicates higher mean value in cases without the variant. The size of symbols indicates absolute Z score number. (H) Variant C17373T in Pearson correlation was with P value below 0.05 (H). After sorting Z score values of Consolidation shadows volume, cases with C29640T and T28144C tend to have the highest Z score, whereas cases with  $\Delta 500\text{-}532$  and ACC18108AT have the lowest.

### 30. COVID-19 likelihood

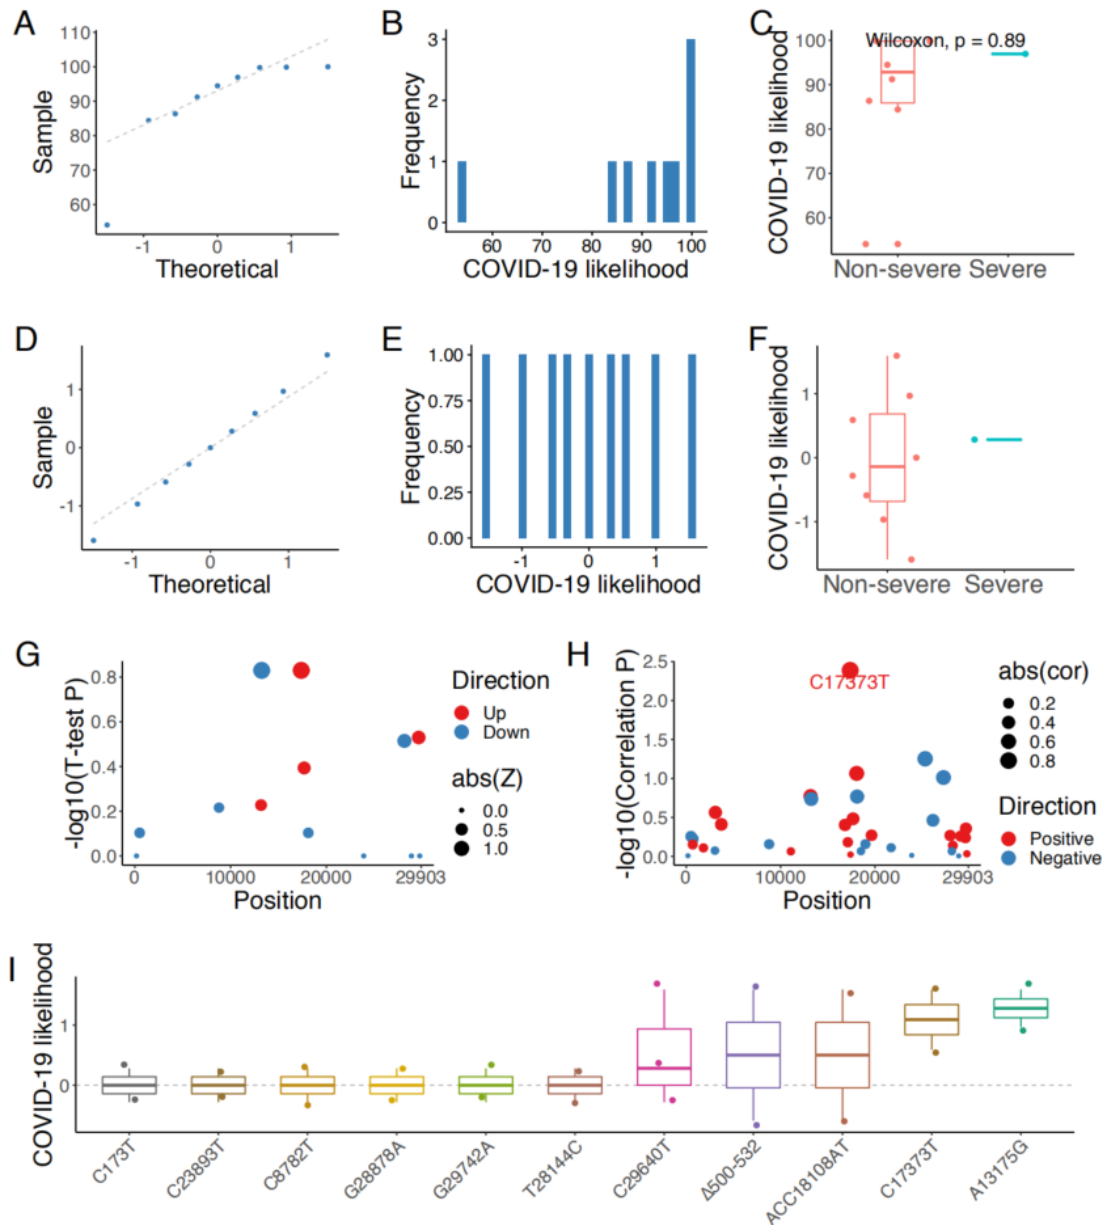

For COVID-19 likelihood (diagnostic accuracy of COVID-19), %, quantile-quantile (QQ) plot and distribution plot before (A and B) and after normalization (D and E) were shown. We compared COVID-19 likelihood in the non-severe and severe COVID-19 patients before (C,  $p = 0.89$ , Wilcoxon test) and after normalization (F). We further performed association analyses between the 35 genetic variants and COVID-19 likelihood using T-test and Pearson correlation. (G) No variant passes P value cut-off of 0.05 in T test. Red indicates higher mean value in cases with the variants and blue indicates higher mean value in cases without the variant. The size of symbols indicates absolute Z score number. (H) Variant C17373T in Pearson correlation was with P value below 0.05 (H). After sorting Z score values of COVID-19 likelihood, cases with A13175G and C17373T tend to have the highest Z score, whereas cases with C173T and C23893T have the lowest.

### 31. Cr (creatinine)

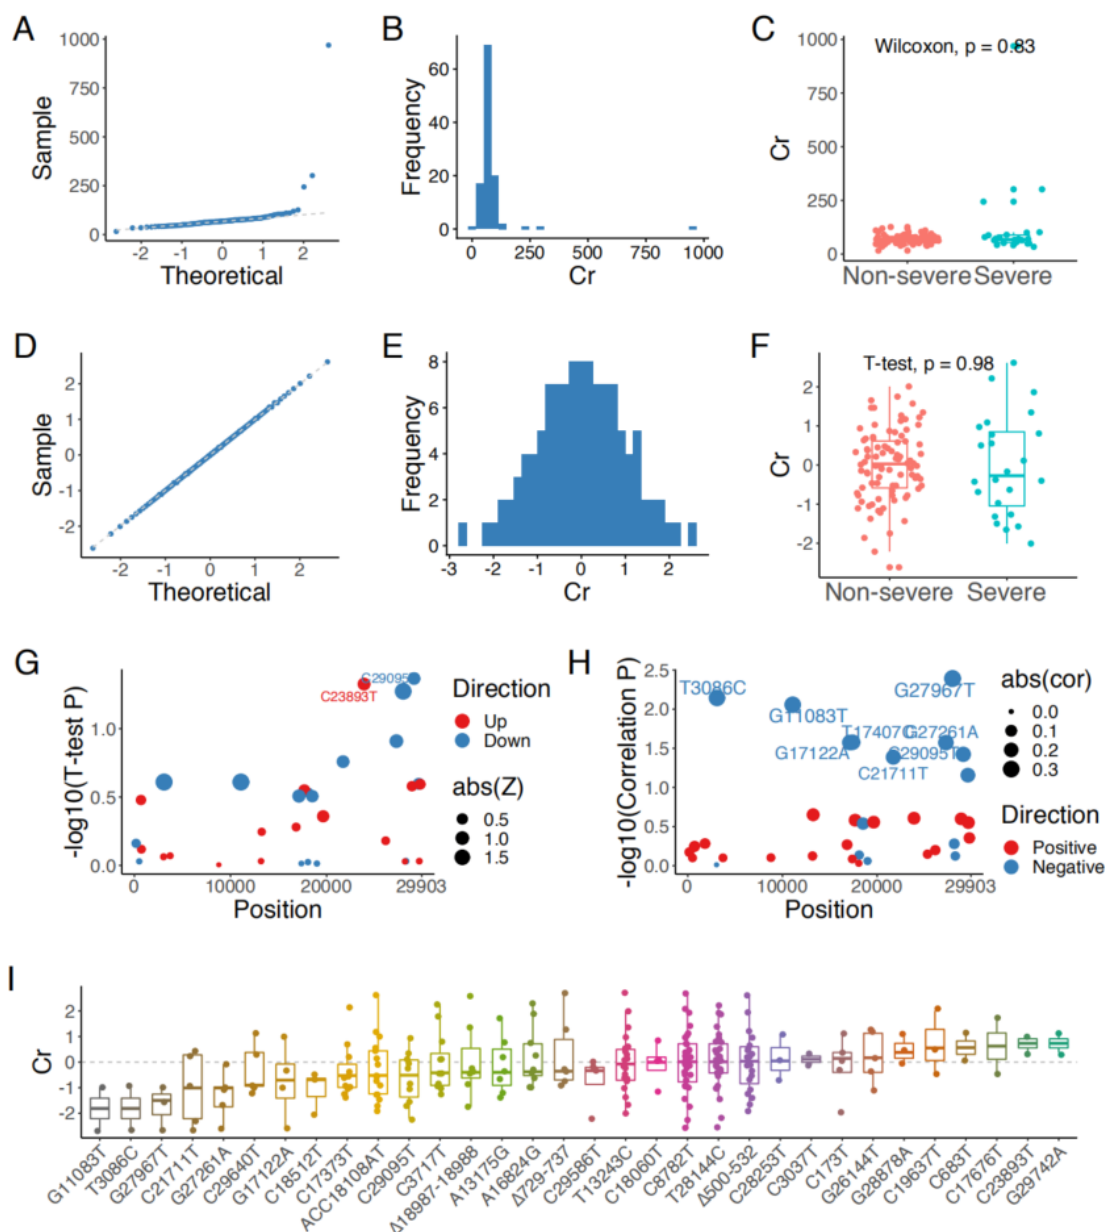

For Cr (creatinine,  $\mu\text{mol/L}$ ), quantile-quantile (QQ) plot and distribution plot before (**A** and **B**) and after normalization (**D** and **E**) were shown. We compared Cr in the non-severe and severe COVID-19 patients before (**C**,  $p = 0.83$ , Wilcoxon test) and after normalization (**F**,  $p = 0.98$ , T-test). We further performed association analyses between the 35 genetic variants and Cr using T-test and Pearson correlation. (**G**) Variants C29095T and C23893T pass P value cut-off of 0.05 in T test. Red indicates higher mean value in cases with the variants and blue indicates higher mean value in cases without the variant. The size of symbols indicates absolute Z score number. (**H**) Variants T3086C, G11083T and G27967T et al have P value lower than 0.05 in Pearson correlation. Red and blue indicates positive and negative correlation, respectively. Size of the dots indicate absolute correlation coefficient. (**I**) After sorting Z score values of Cr, cases with G29742A and C23893T tend to have the highest Z score, whereas cases with G11083T and T3086C have the lowest.

## 32. CRP (C-reactive protein)

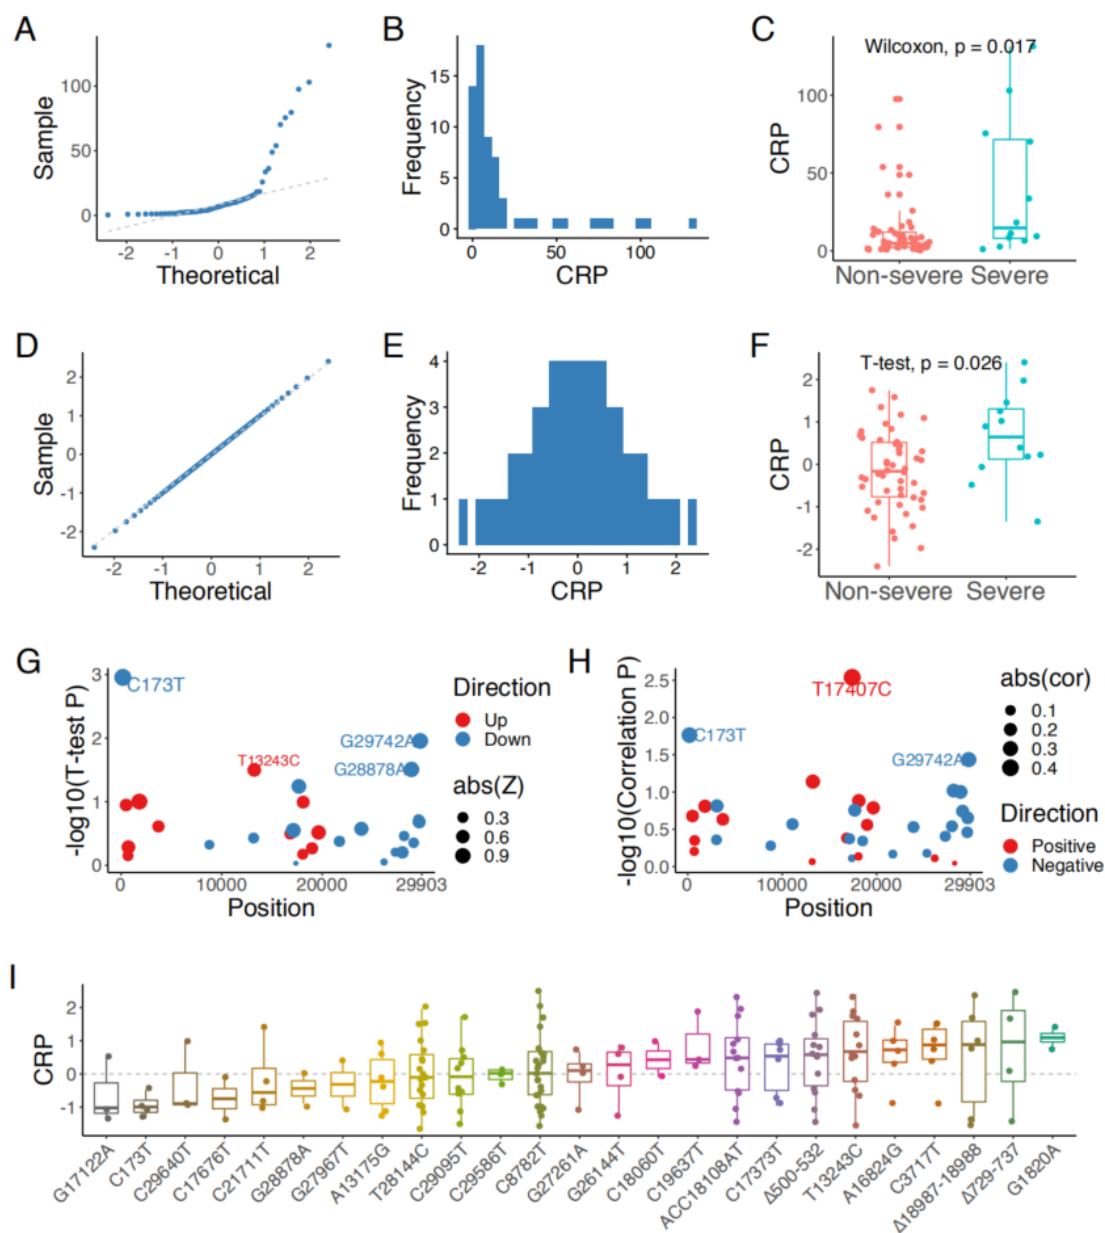

For CRP (C-reactive protein), quantile-quantile (QQ) plot and distribution plot before (**A** and **B**) and after normalization (**D** and **E**) were shown. We compared CRP in the non-severe and severe COVID-19 patients before (**C**,  $p = 0.017$ , Wilcoxon test) and after normalization (**F**,  $p = 0.026$ , T-test). We further performed association analyses between the 35 genetic variants and CRP using T-test and Pearson correlation. (**G**) Variants C173T, G29742A, G28878A and T13243C pass P value cut-off of 0.05 in T test. Red indicates higher mean value in cases with the variants and blue indicates higher mean value in cases without the variant. The size of symbols indicates absolute Z score number. (**H**) Variants T17407C, C173T and G29742A have P value lower than 0.05 in Pearson correlation. Red and blue indicates positive and negative correlation, respectively. Size of the dots indicate absolute correlation coefficient. (**I**) After sorting Z score values of CRP, cases with G1820A and  $\Delta 729-737$  tend to have the highest Z score, whereas cases with G17122A and C173T have the lowest.

### 33. Cys-C (Cystatin C)

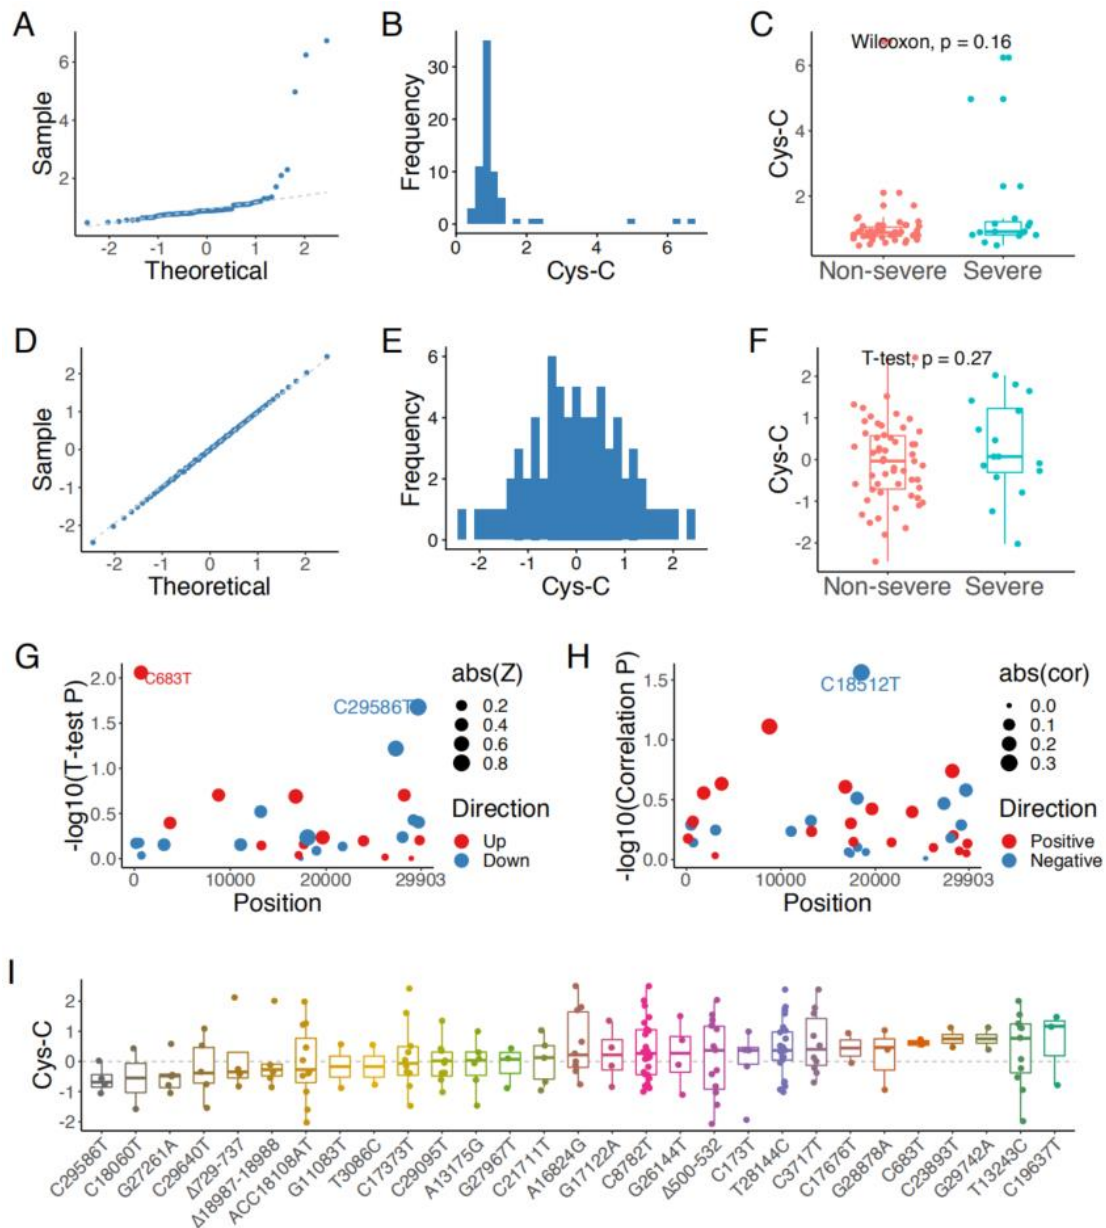

For Cys-C (Cystatin C, mg/L), quantile-quantile (QQ) plot and distribution plot before (**A** and **B**) and after normalization (**D** and **E**) were shown. We compared Cys-C in the non-severe and severe COVID-19 patients before (**C**,  $p = 0.16$ , Wilcoxon test) and after normalization (**F**,  $p = 0.27$ , T-test). We further performed association analyses between the 35 genetic variants and Cys-C using T-test and Pearson correlation. (**G**) Variants C683T and C29586T pass P value cut-off of 0.05 in T test. Red indicates higher mean value in cases with the variants and blue indicates higher mean value in cases without the variant. The size of symbols indicates absolute Z score number. (**H**) Variant C18512T has P value lower than 0.05 in Pearson correlation. Red and blue indicates positive and negative correlation, respectively. Size of the dots indicate absolute correlation coefficient. (**I**) After sorting Z score values of Cys-C, cases with C19637T and T13243C tend to have the highest Z score, whereas cases with C29586T and C18060T have the lowest.

### 34. DBIL (direct bilirubin)

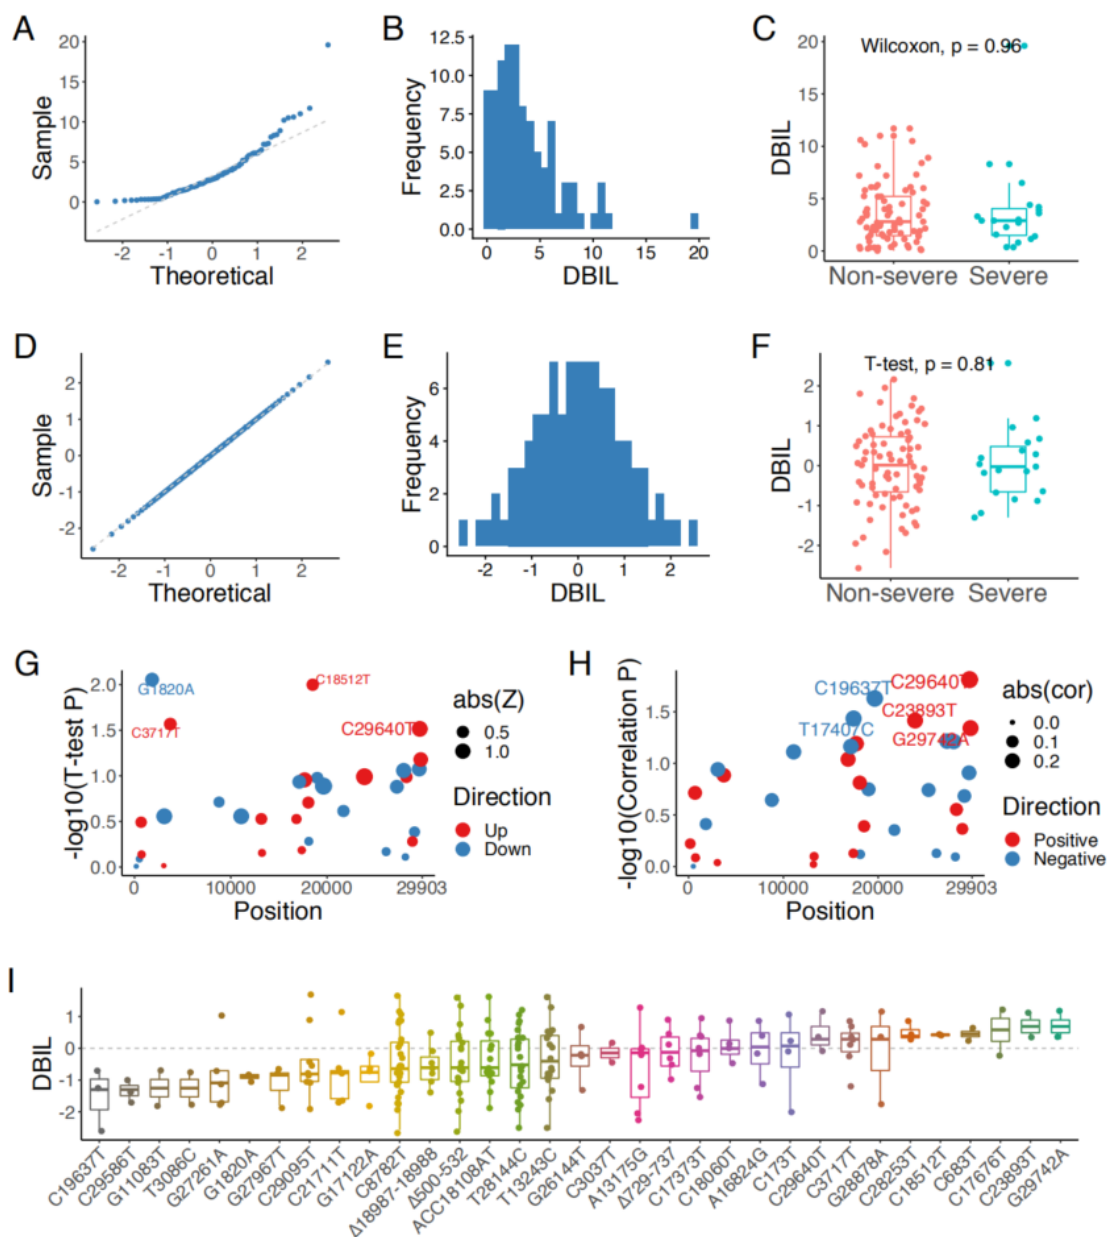

For DBIL (direct bilirubin,  $\mu\text{mol/L}$ ), quantile-quantile (QQ) plot and distribution plot before (A and B) and after normalization (D and E) were shown. We compared DBIL in the non-severe and severe COVID-19 patients before (C,  $p = 0.96$ , Wilcoxon test) and after normalization (F,  $p = 0.81$ , T-test). We further performed association analyses between the 35 genetic variants and DBIL using T-test and Pearson correlation. (G) Variants G1820A, C3717T, C18512T and C29640T pass P value cut-off of 0.05 in T test. Red indicates higher mean value in cases with the variants and blue indicates higher mean value in cases without the variant. The size of symbols indicates absolute Z score number. (H) Variants C19637T, C29640T and C23893T et al have P value lower than 0.05 in Pearson correlation. Red and blue indicates positive and negative correlation, respectively. Size of the dots indicate absolute correlation coefficient. (I) After sorting Z score values of DBIL, cases with G29742A and C23893T tend to have the highest Z score, whereas cases with C19637T and C29586T have the lowest.

## 35. D-dimer

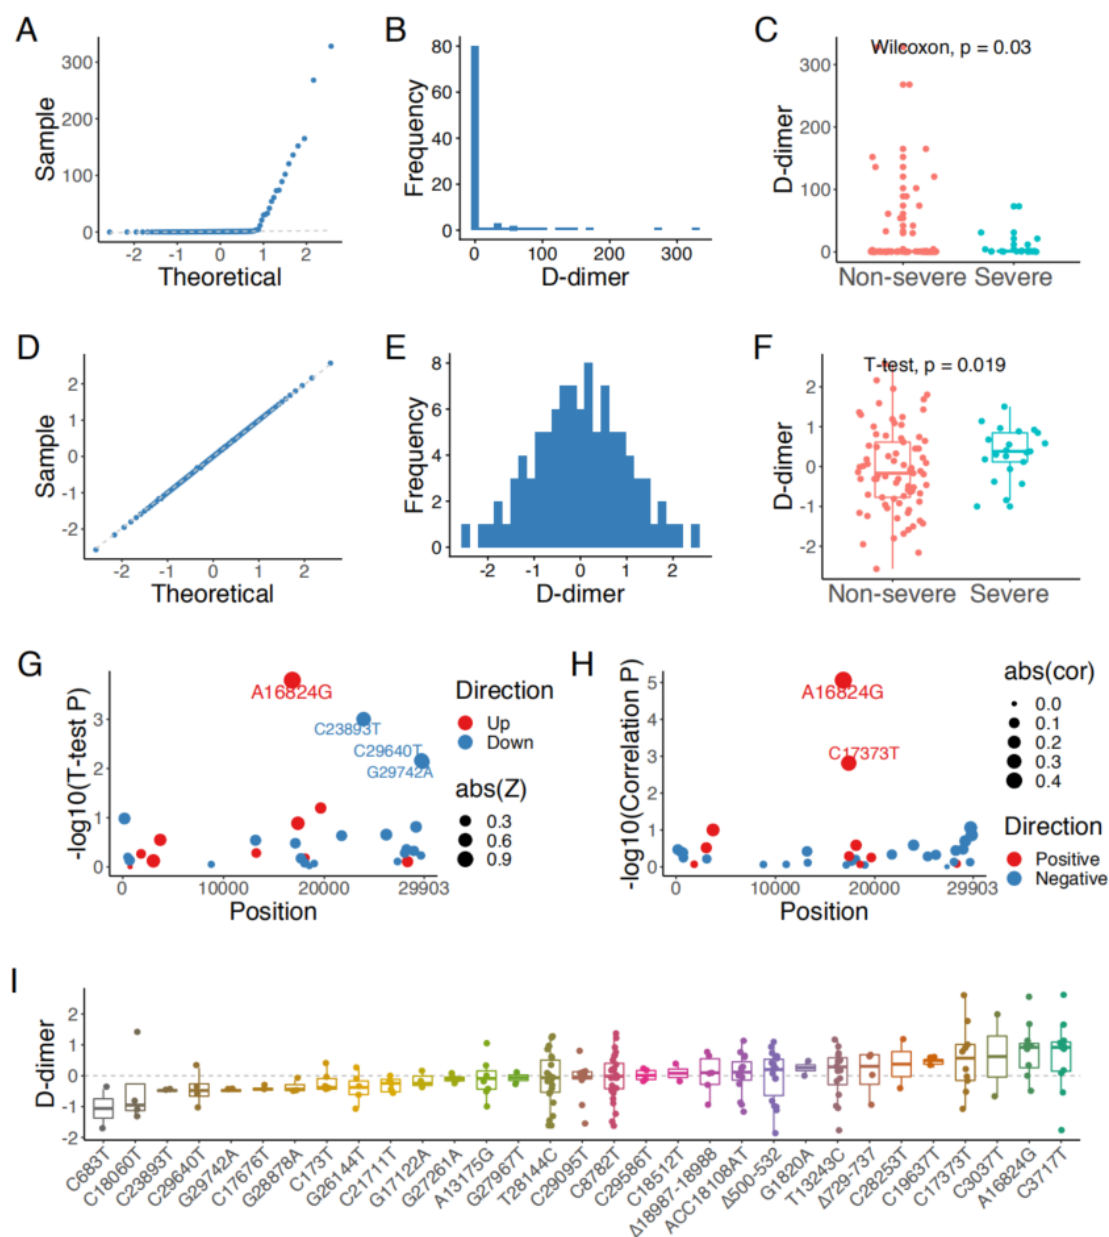

For D-dimer (ng/mL), quantile-quantile (QQ) plot and distribution plot before (A and B) and after normalization (D and E) were shown. We compared D-dimer in the non-severe and severe COVID-19 patients before (C,  $p = 0.03$ , Wilcoxon test) and after normalization (F,  $p = 0.019$ , T-test). We further performed association analyses between the 35 genetic variants and D-dimer using T-test and Pearson correlation. (G) Variants A16824G, C23893T, C29640T and G29742A pass P value cut-off of 0.05 in T test. Red indicates higher mean value in cases with the variants and blue indicates higher mean value in cases without the variant. The size of symbols indicates absolute Z score number. (H) Variants A16824G and C17373T have P value lower than 0.05 in Pearson correlation. Red and blue indicates positive and negative correlation, respectively. Size of the dots indicate absolute correlation coefficient. (I) After sorting Z score values of D-dimer, cases with C3717T and A16824G tend to have the highest Z score, whereas cases with C683T and C18060T have the lowest.

## 36. Diastolic pressure

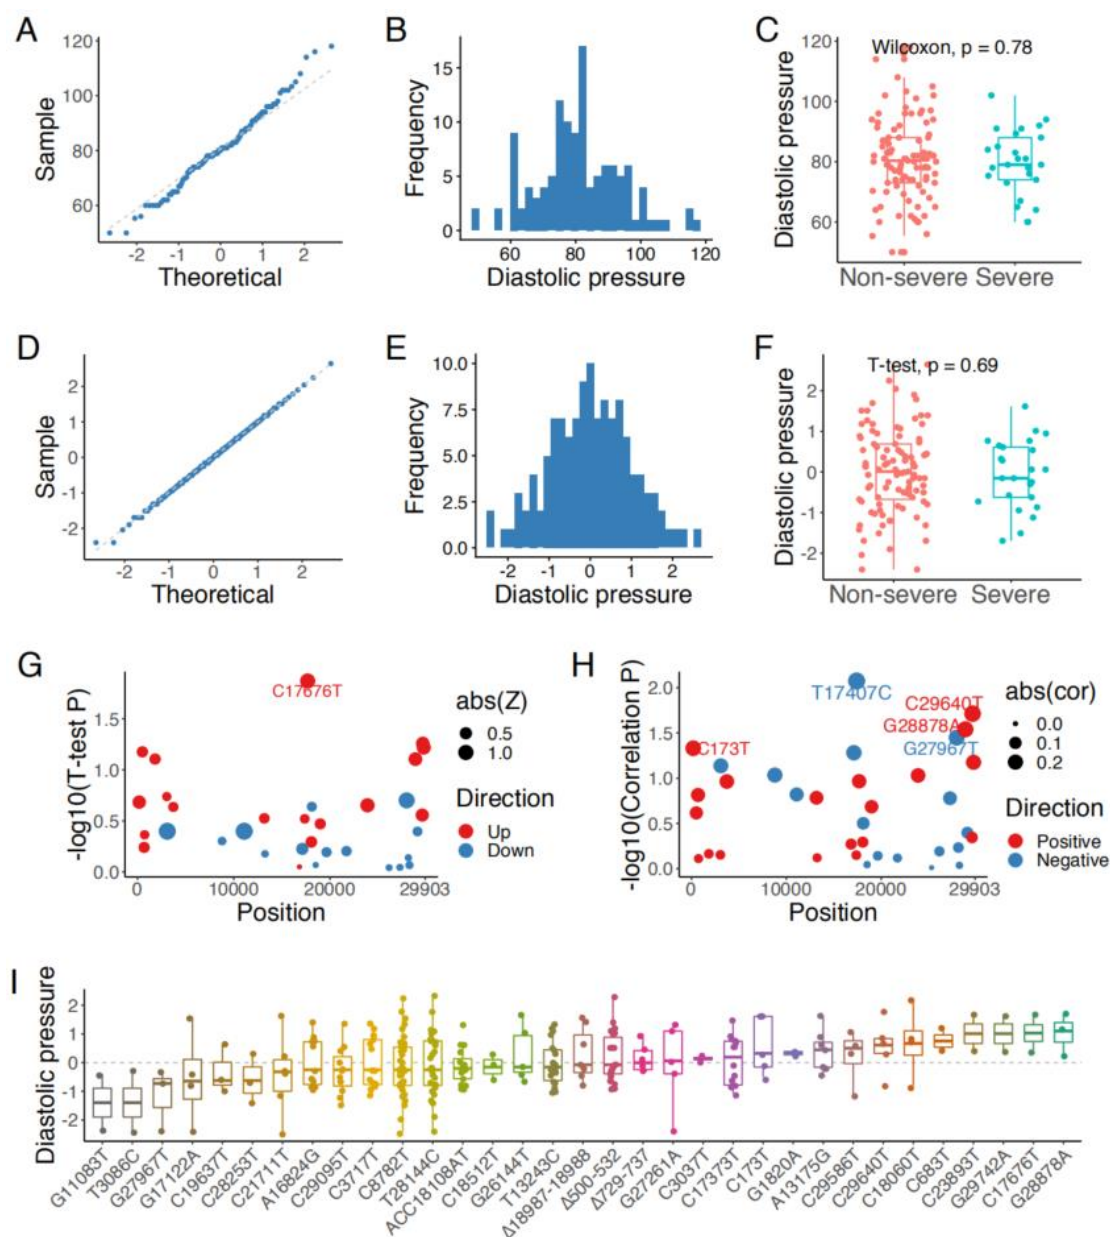

For Diastolic pressure (mmHg), quantile-quantile (QQ) plot and distribution plot before (A and B) and after normalization (D and E) were shown. We compared Diastolic pressure in the non-severe and severe COVID-19 patients before (C,  $p = 0.78$ , Wilcoxon test) and after normalization (F,  $p = 0.69$ , T-test). We further performed association analyses between the 35 genetic variants and Diastolic pressure using T-test and Pearson correlation. (G) Variant C17676T passes P value cut-off of 0.05 in T test. Red indicates higher mean value in cases with the variants and blue indicates higher mean value in cases without the variant. The size of symbols indicates absolute Z score number. (H) Variants T17407C, C29640T and G28878A et al have P value lower than 0.05 in Pearson correlation. Red and blue indicates positive and negative correlation, respectively. Size of the dots indicate absolute correlation coefficient. (I) After sorting Z score values of Diastolic pressure, cases with G28878A and C17676T tend to have the highest Z score, whereas cases with G11083T and T3086C have the lowest.



### 37. eGFR (estimated glomerular filtration rate)

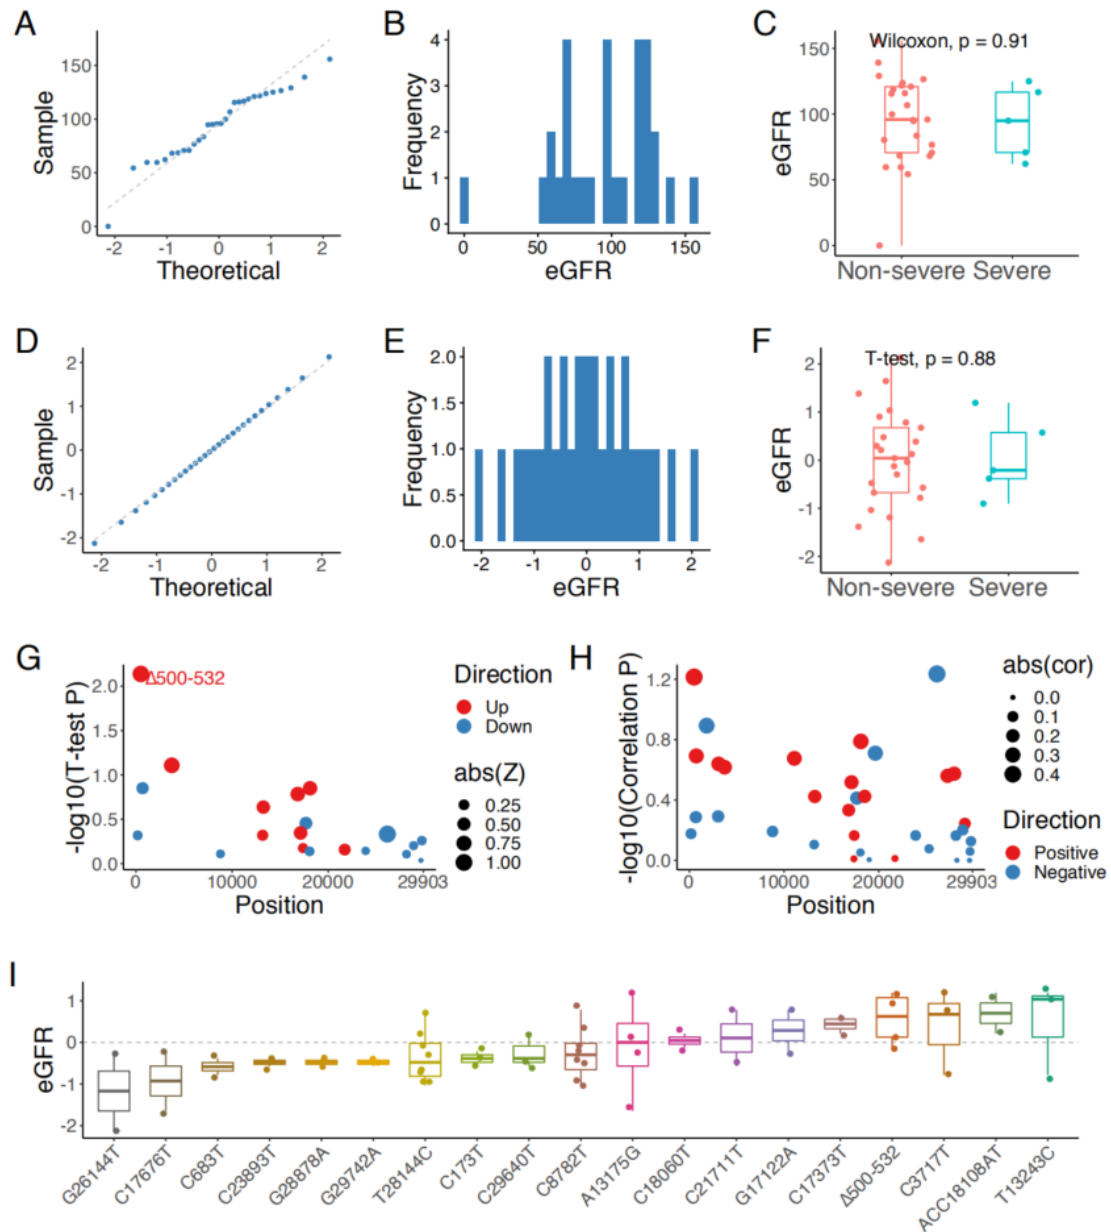

For eGFR (estimated glomerular filtration rate, %), quantile-quantile (QQ) plot and distribution plot before (A and B) and after normalization (D and E) were shown. We compared eGFR in the non-severe and severe COVID-19 patients before (C,  $p = 0.91$ , Wilcoxon test) and after normalization (F,  $p = 0.88$ , T-test). We further performed association analyses between the 35 genetic variants and eGFR using T-test and Pearson correlation. (G) Variant  $\Delta 500-532$  passes P value cut-off of 0.05 in T test. Red indicates higher mean value in cases with the variants and blue indicates higher mean value in cases without the variant. The size of symbols indicates absolute Z score number. (H) No variant in Pearson correlation has P value below 0.05. After sorting Z score values of eGFR, cases with T13243C and ACC18108AT tend to have the highest Z score, whereas cases with G26144T and C17676T have the lowest.

### 38. EOS (eosinophil count)

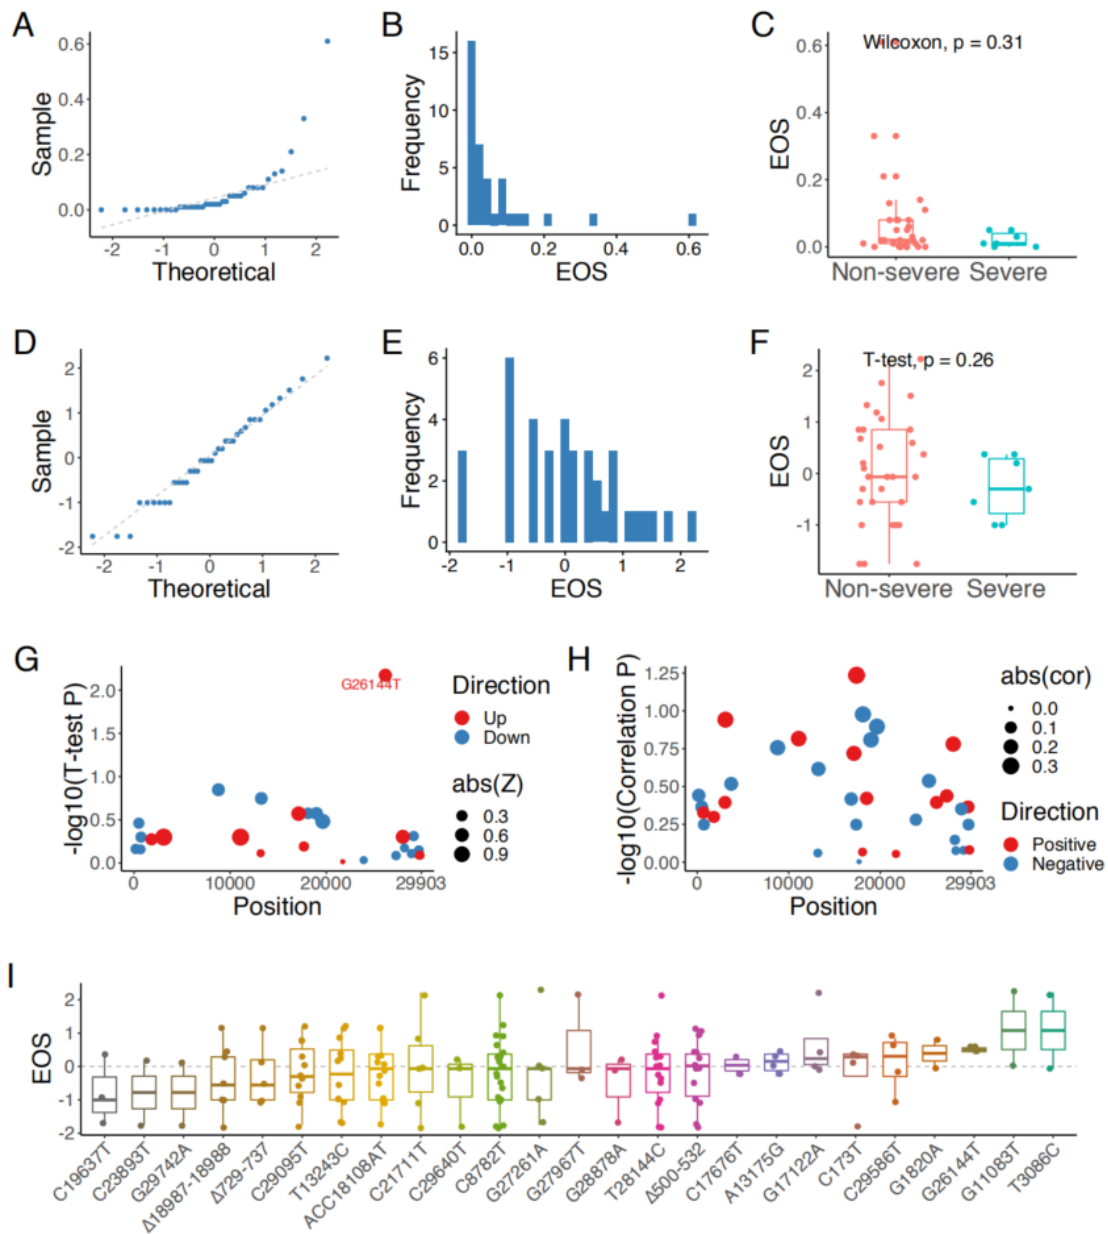

For EOS (eosinophil count,  $\times 10^9/L$ ), quantile-quantile (QQ) plot and distribution plot before (A and B) and after normalization (D and E) were shown. We compared EOS in the non-severe and severe COVID-19 patients before (C,  $p = 0.31$ , Wilcoxon test) and after normalization (F,  $p = 0.26$ , T-test). We further performed association analyses between the 35 genetic variants and EOS using T-test and Pearson correlation. (G) Variant G26144T passes P value cut-off of 0.05 in T test. Red indicates higher mean value in cases with the variants and blue indicates higher mean value in cases without the variant. The size of symbols indicates absolute Z score number. (H) No variant in Pearson correlation has P value below 0.05. After sorting Z score values of EOS, cases with T3086C and G11083T tend to have the highest Z score, whereas cases with C19637T and C23893T have the lowest.

### 39. EOS % (eosinophil percentage)

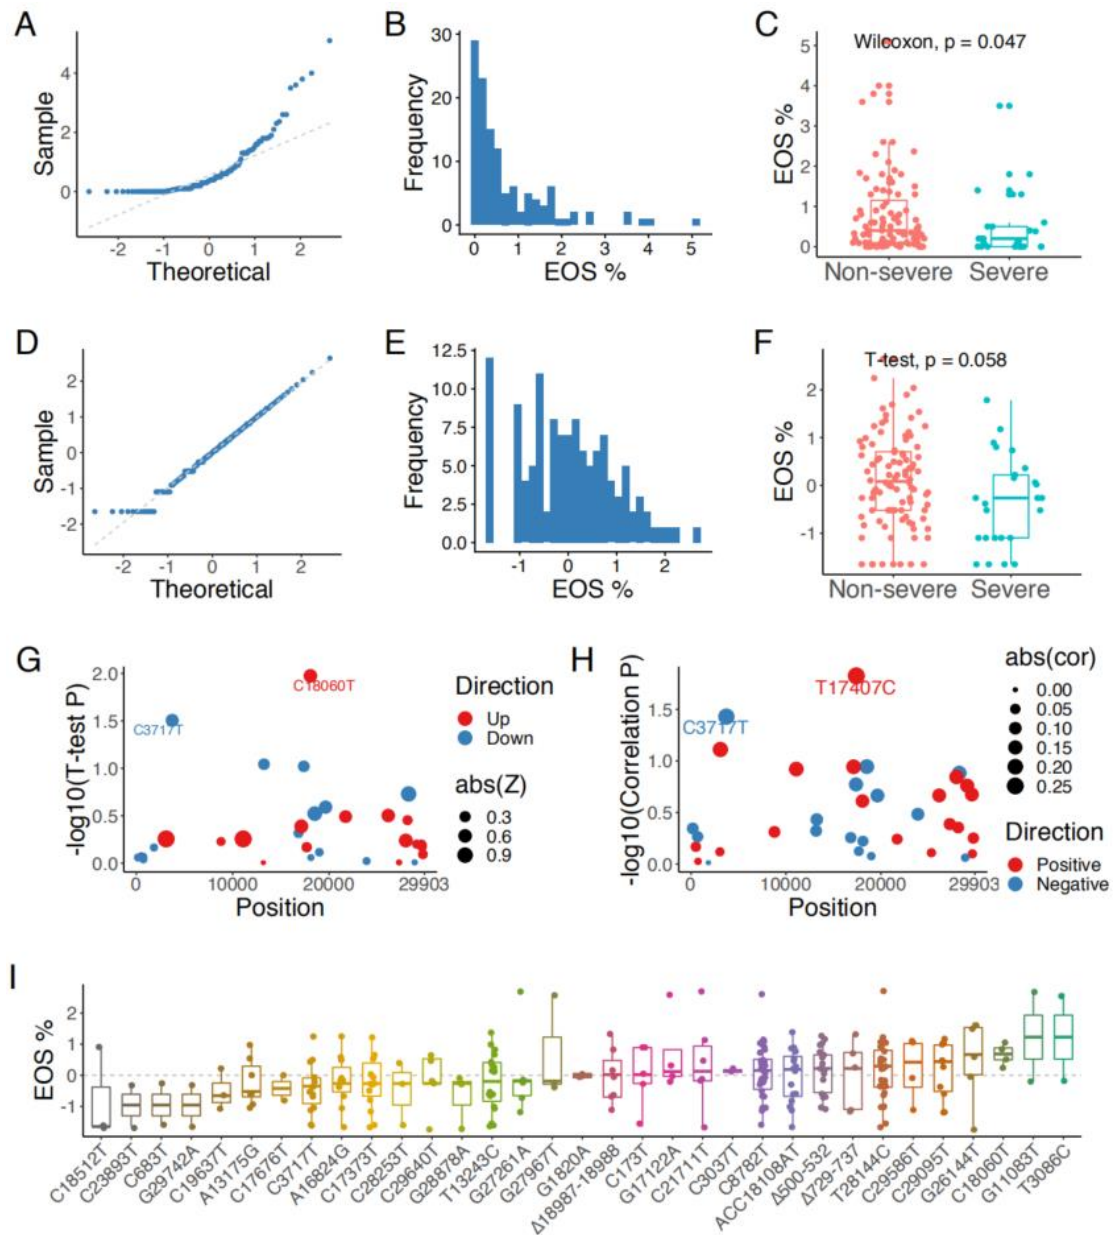

For EOS % (eosinophil percentage), quantile-quantile (QQ) plot and distribution plot before (**A** and **B**) and after normalization (**D** and **E**) were shown. We compared EOS % in the non-severe and severe COVID-19 patients before (**C**,  $p = 0.047$ , Wilcoxon test) and after normalization (**F**,  $p = 0.058$ , T-test). We further performed association analyses between the 35 genetic variants and EOS % using T-test and Pearson correlation. (**G**) Variants C18060T and C3717T pass P value cut-off of 0.05 in T test. Red indicates higher mean value in cases with the variants and blue indicates higher mean value in cases without the variant. The size of symbols indicates absolute Z score number. (**H**) Variants C3717T and T17407C have P value lower than 0.05 in Pearson correlation. Red and blue indicates positive and negative correlation, respectively. Size of the dots indicate absolute correlation coefficient. (**I**) After sorting Z score values of EOS %, cases with T3086C and G11083T tend to have the highest Z score, whereas cases with C18512T and C23893T have the lowest.

## 40. ESR (erythrocyte sedimentation rate)

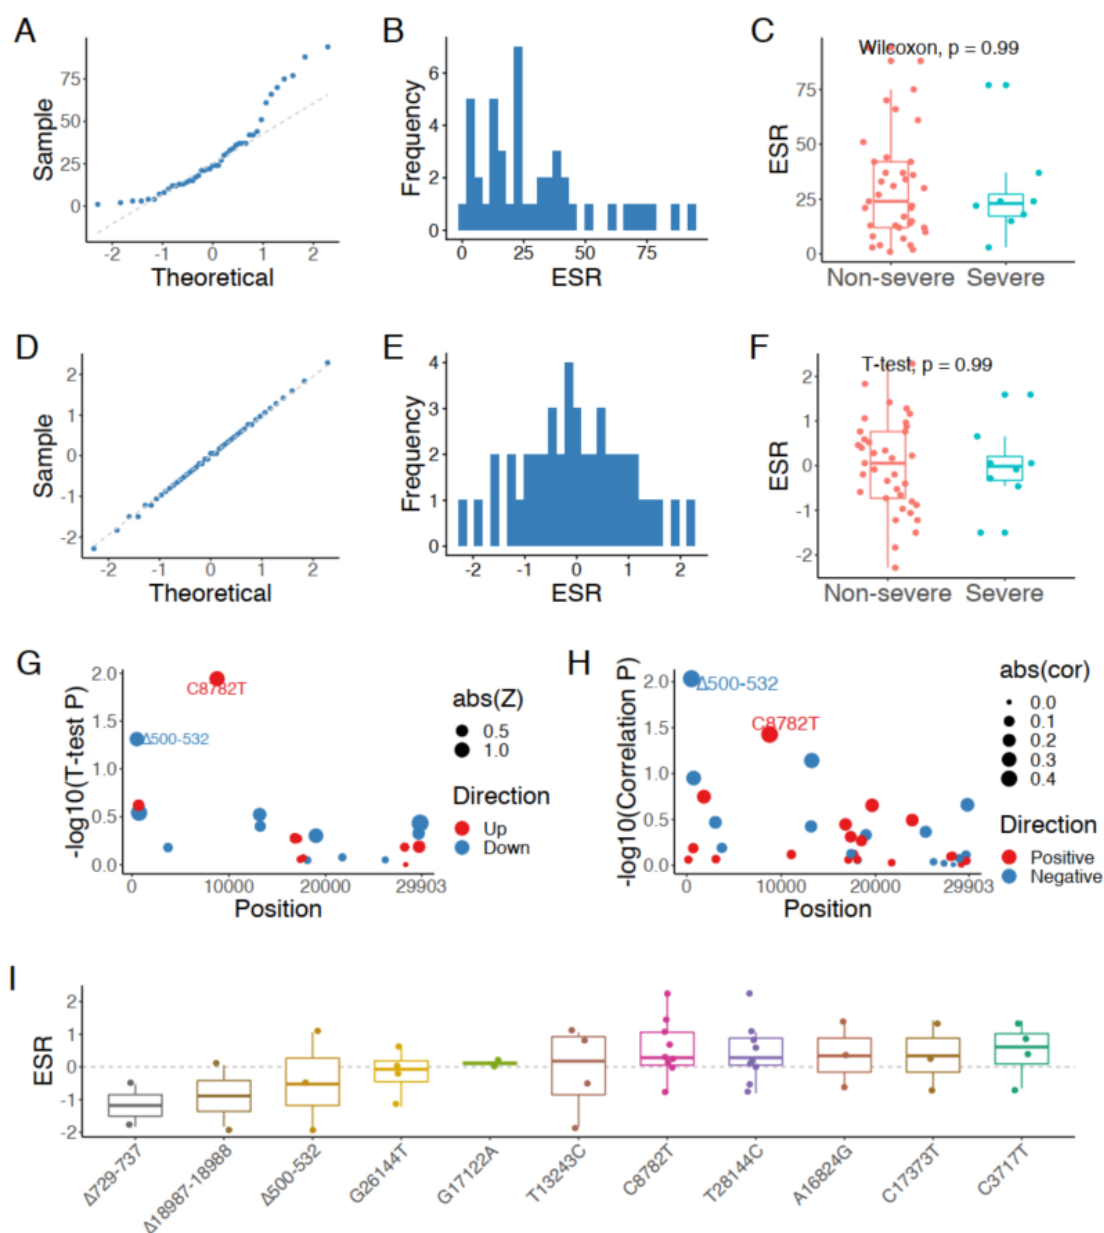

For ESR (erythrocyte sedimentation rate, mm/h), quantile-quantile (QQ) plot and distribution plot before (A and B) and after normalization (D and E) were shown. We compared ESR in the non-severe and severe COVID-19 patients before (C,  $p = 0.99$ , Wilcoxon test) and after normalization (F,  $p = 0.99$ , T-test). We further performed association analyses between the 35 genetic variants and ESR using T-test and Pearson correlation. (G) Variants C8782T and  $\Delta 500-532$  in the T test (G) and Pearson correlation were with P value below 0.05 (H). After sorting Z score values of ESR, cases with C3717T and C17373T tend to have the highest Z score, whereas cases with  $\Delta 729-737$  and  $\Delta 18987-18988$  have the lowest.

## 41. FIB (fibrinogen)

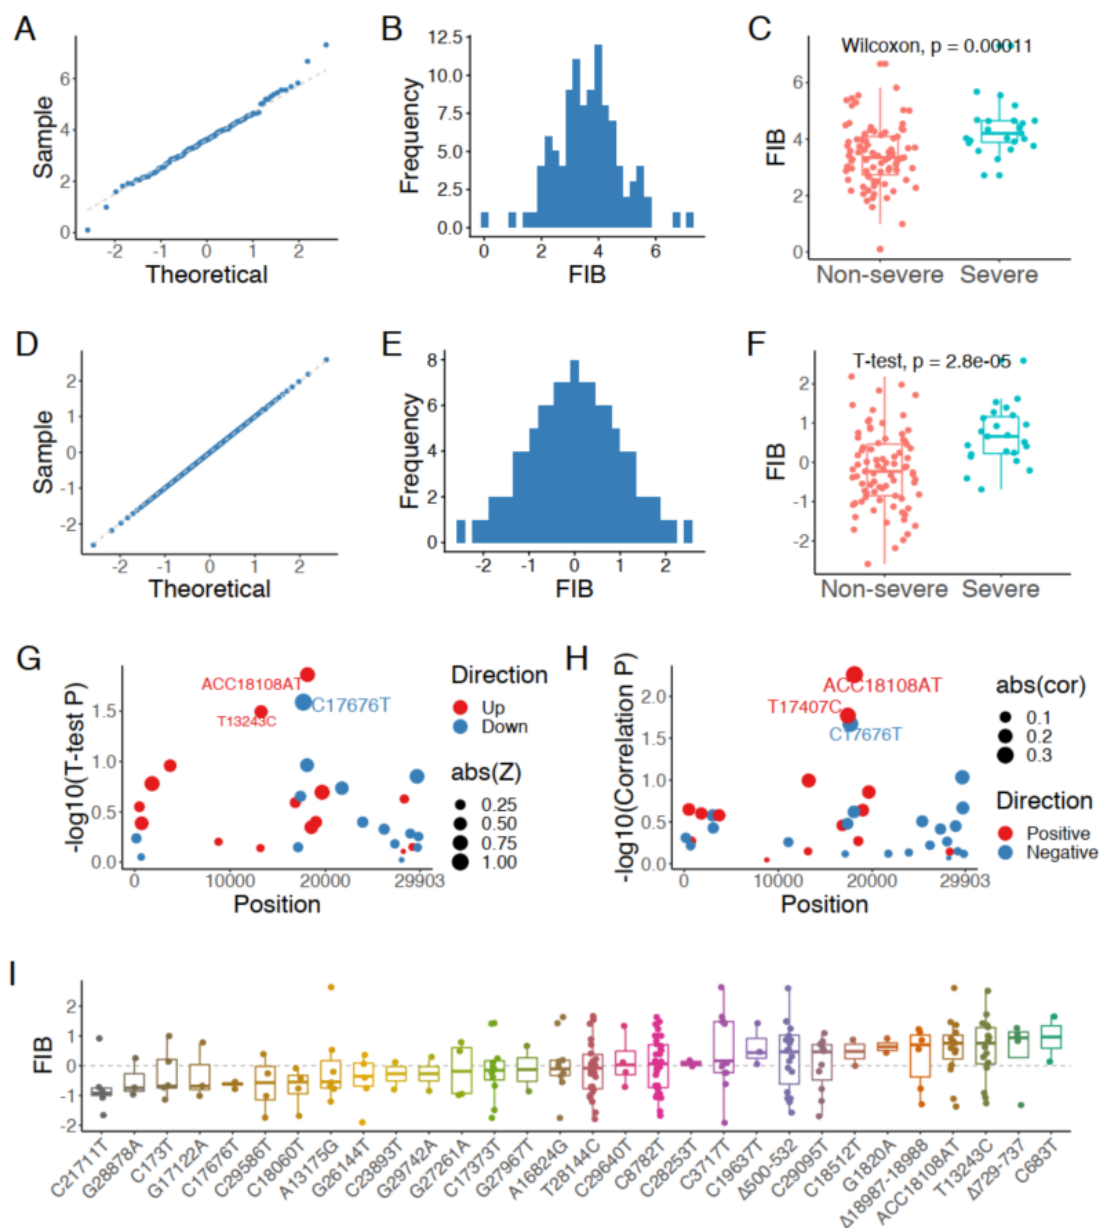

For FIB (fibrinogen, g/L), quantile-quantile (QQ) plot and distribution plot before (A and B) and after normalization (D and E) were shown. We compared FIB in the non-severe and severe COVID-19 patients before (C,  $p = 1.1 \times 10^{-4}$ , Wilcoxon test) and after normalization (F,  $p = 2.8 \times 10^{-5}$ , T-test). We further performed association analyses between the 35 genetic variants and FIB using T-test and Pearson correlation. (G) Variants ACC18108AT, T13243C and C17676T pass P value cut-off of 0.05 in T test. Red indicates higher mean value in cases with the variants and blue indicates higher mean value in cases without the variant. The size of symbols indicates absolute Z score number. (H) Variants ACC18108AT, T17407C and C17676T have P value lower than 0.05 in Pearson correlation. Red and blue indicates positive and negative correlation, respectively. Size of the dots indicate absolute correlation coefficient. (I) After sorting Z score values of FIB, cases with C683T and  $\Delta 729-737$  tend to have the highest Z score, whereas cases with C21711T and G28878A have the lowest.

## 42. GGO (ground-glass opacities)

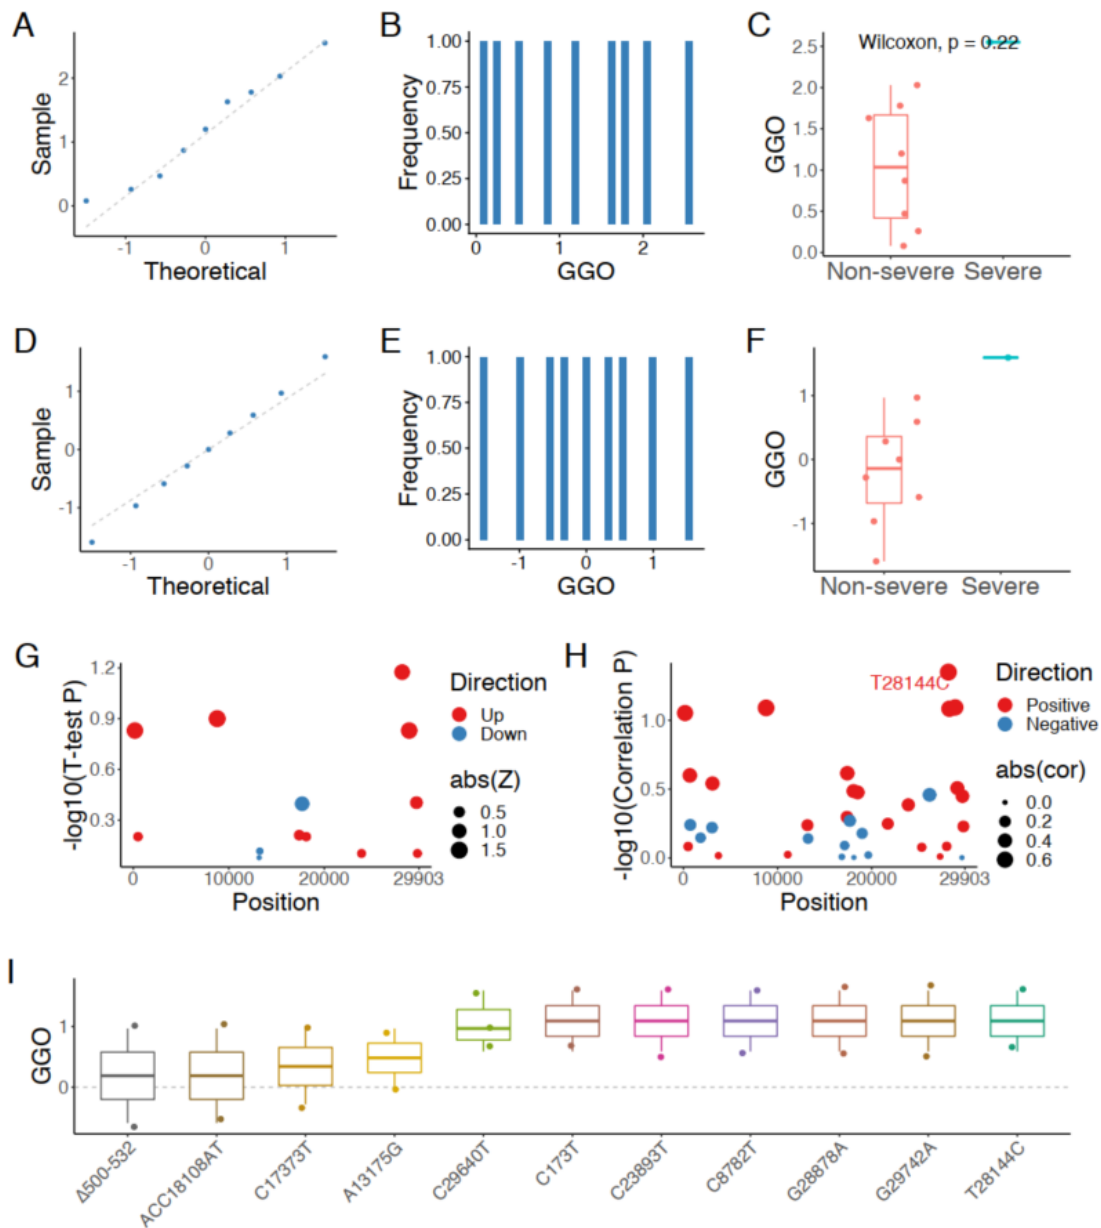

For GGO (ground-glass opacities, %), quantile-quantile (QQ) plot and distribution plot before (**A** and **B**) and after normalization (**D** and **E**) were shown. We compared GGO in the non-severe and severe COVID-19 patients before (**C**,  $p = 0.22$ , Wilcoxon test) and after normalization (**F**). We further performed association analyses between the 35 genetic variants and GGO using T-test and Pearson correlation. (**G**) No variant passes P value cut-off of 0.05 in T test. Red indicates higher mean value in cases with the variants and blue indicates higher mean value in cases without the variant. The size of symbols indicates absolute Z score number. (**H**) Variant T28144C in Pearson correlation was with P value below 0.05 (**H**). After sorting Z score values of GGO, cases with T28144C and G29742A tend to have the highest Z score, whereas cases with  $\Delta 500-532$  and ACC18108AT have the lowest.

### 43. GGO volume (volume of ground-glass opacity)

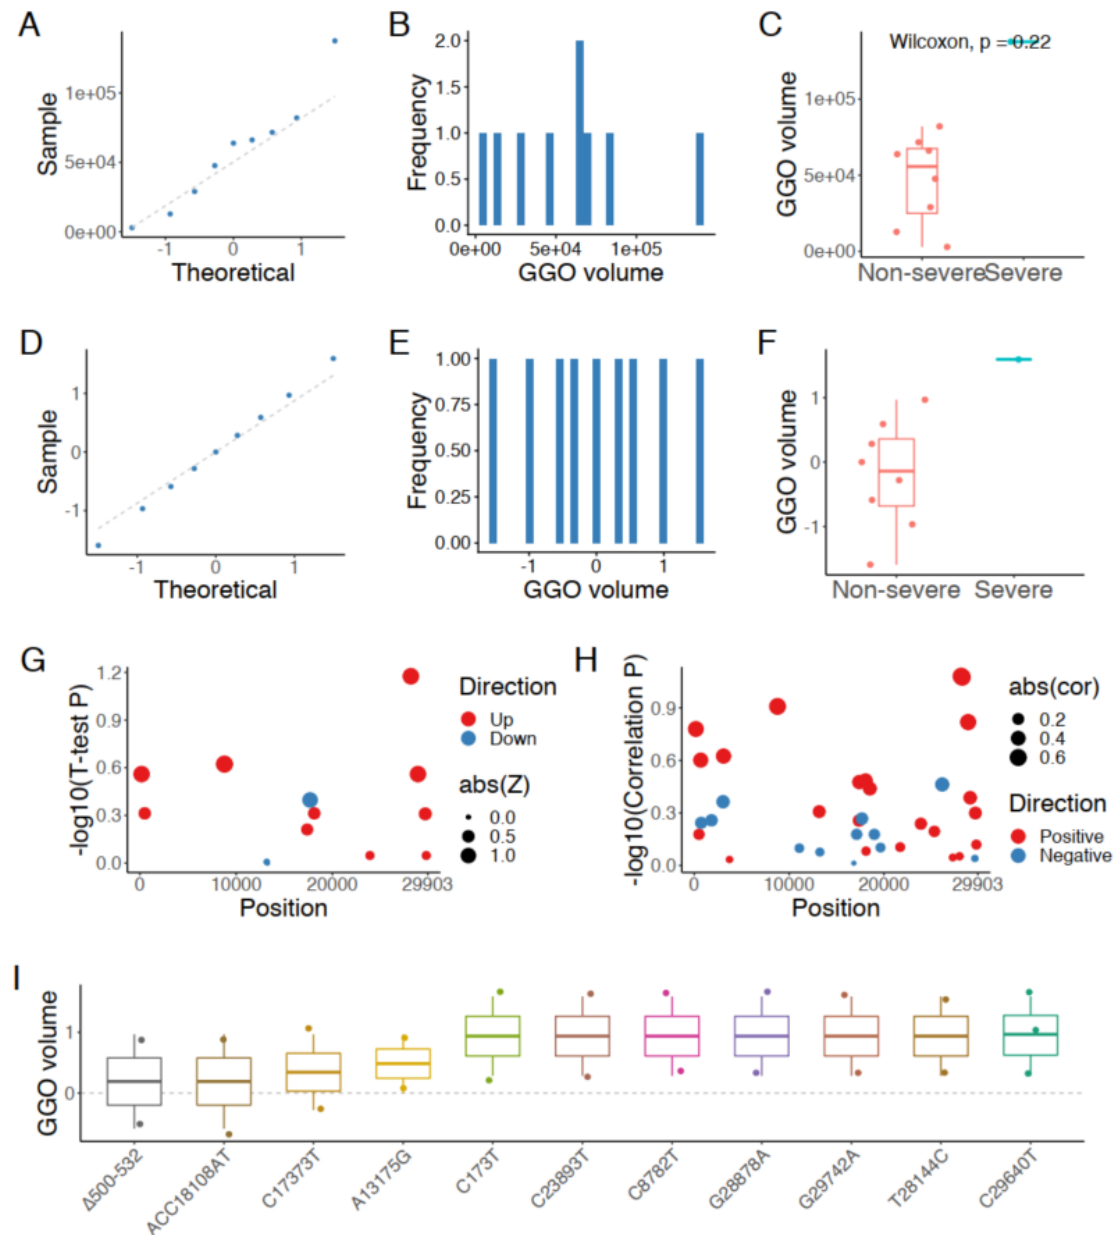

For GGO volume (volume of ground-glass opacity,  $\text{mm}^3$ ), quantile-quantile (QQ) plot and distribution plot before (A and B) and after normalization (D and E) were shown. We compared GGO volume in the non-severe and severe COVID-19 patients before (C,  $p = 0.22$ , Wilcoxon test) and after normalization (F). We further performed association analyses between the 35 genetic variants and GGO volume using T-test and Pearson correlation. (G) No variant in the T test (G) and Pearson correlation was with P value below 0.05 (H). After sorting Z score values of GGO volume, cases with C29640T and T28144C tend to have the highest Z score, whereas cases with  $\Delta 500-532$  and ACC18108AT have the lowest.

#### 44. GGT (gamma-glutamyl transferase)

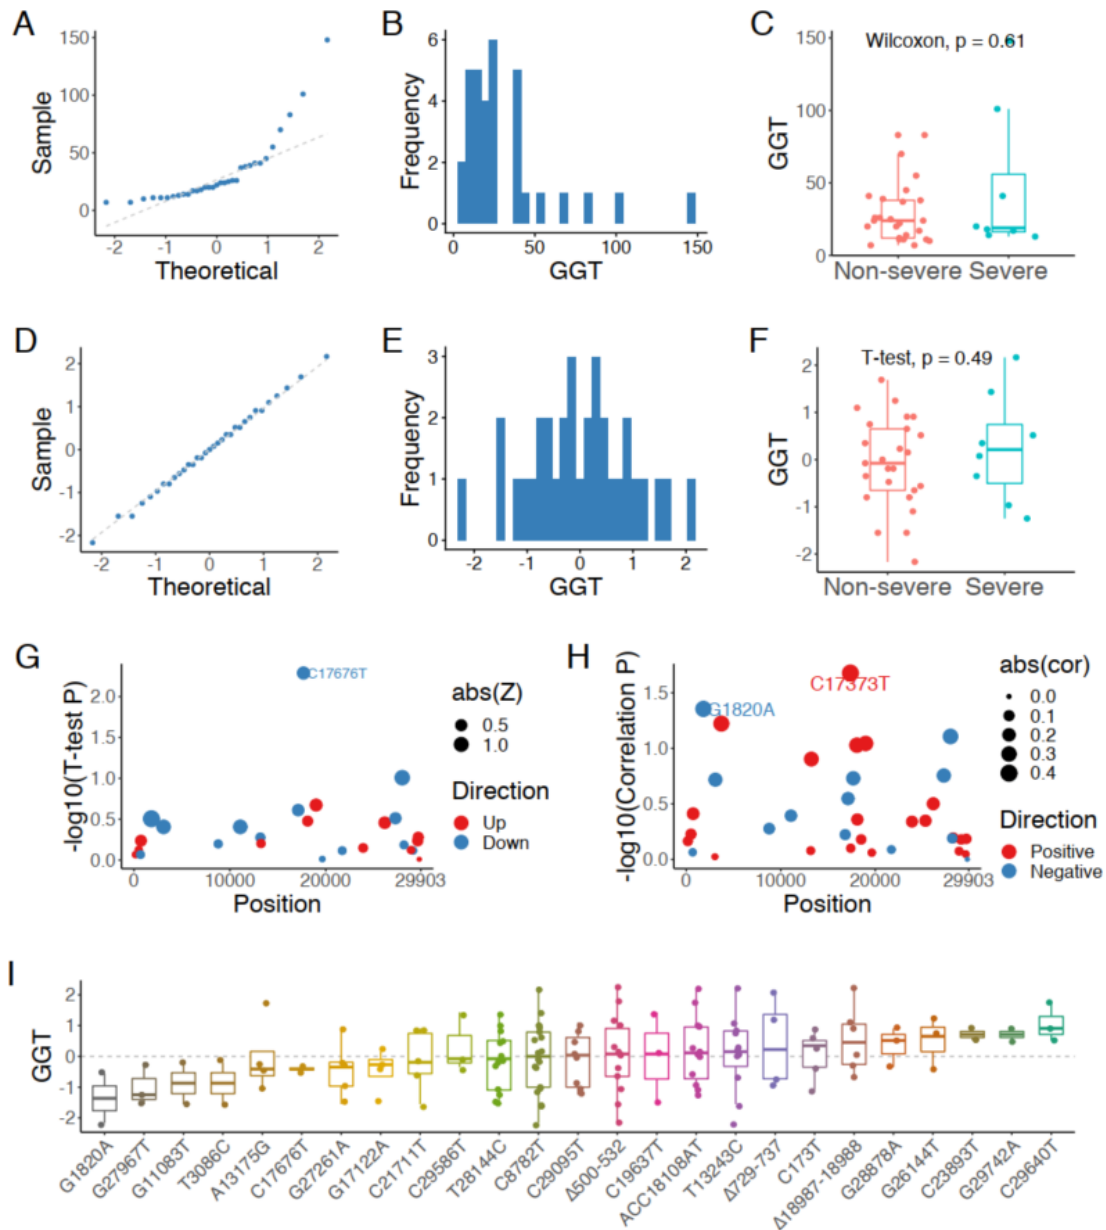

For GGT (gamma-glutamyl transferase, U/L), quantile-quantile (QQ) plot and distribution plot before (A and B) and after normalization (D and E) were shown. We compared GGT in the non-severe and severe COVID-19 patients before (C,  $p = 0.61$ , Wilcoxon test) and after normalization (F,  $p = 0.49$ , T-test). We further performed association analyses between the 35 genetic variants and GGT using T-test and Pearson correlation. (G) Variant C17676T passes P value cut-off of 0.05 in T test. Red indicates higher mean value in cases with the variants and blue indicates higher mean value in cases without the variant. The size of symbols indicates absolute Z score number. (H) Variants G1820A and C17373T have P value lower than 0.05 in Pearson correlation. Red and blue indicates positive and negative correlation, respectively. Size of the dots indicate absolute correlation coefficient. (I) After sorting Z score values of GGT, cases with C29640T and C29742A tend to have the highest Z score, whereas cases with G1820A and G27967T have the lowest.



## 45. Glb (globin)

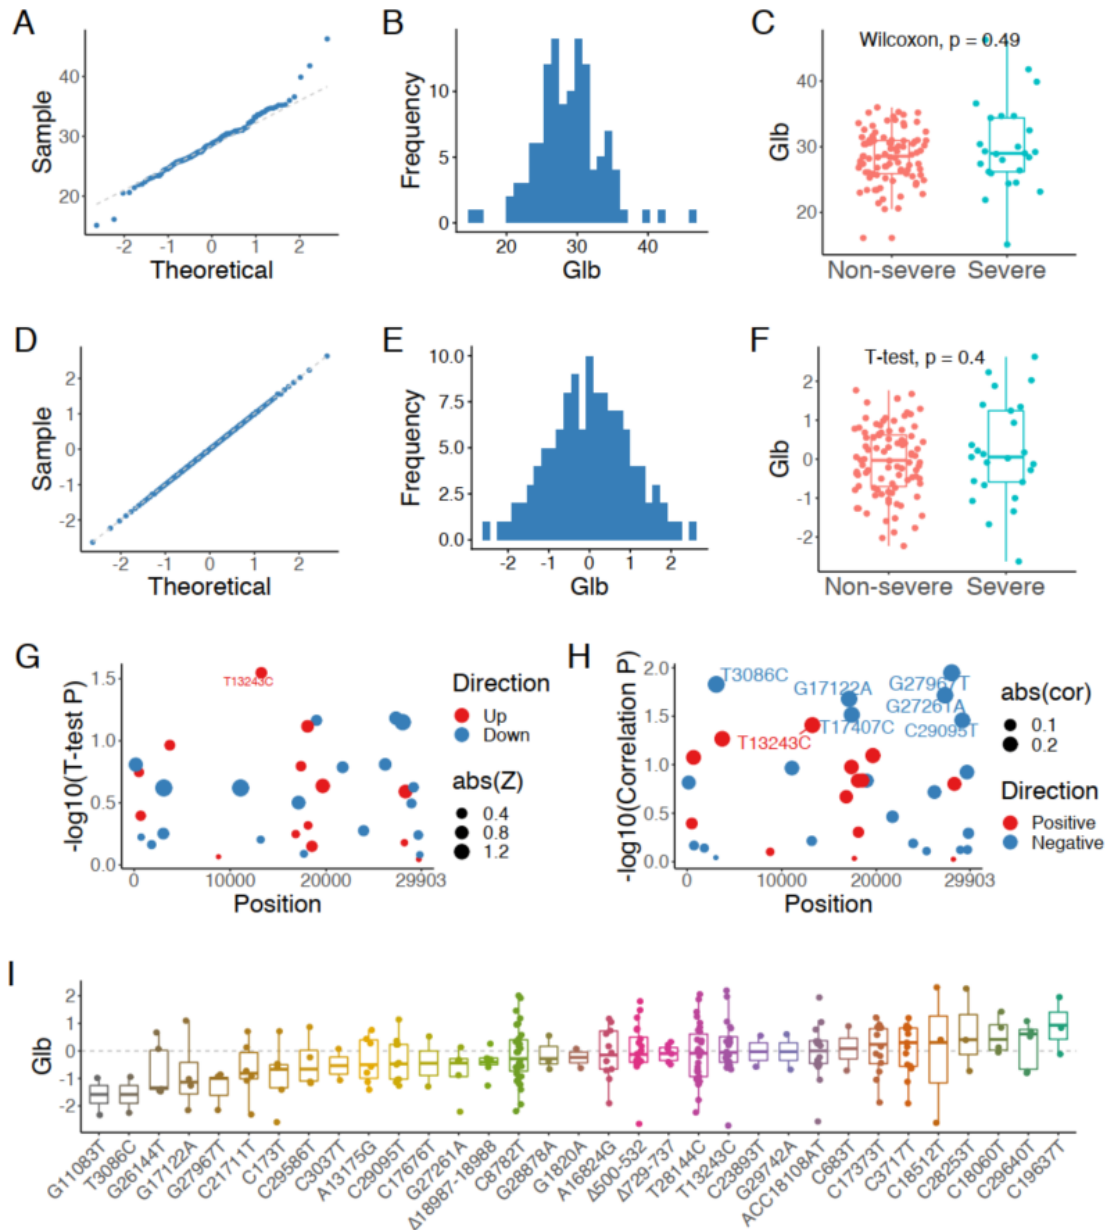

For Glb (globin, g/L), quantile-quantile (QQ) plot and distribution plot before (A and B) and after normalization (D and E) were shown. We compared Glb in the non-severe and severe COVID-19 patients before (C,  $p = 0.49$ , Wilcoxon test) and after normalization (F,  $p = 0.4$ , T-test). We further performed association analyses between the 35 genetic variants and Glb using T-test and Pearson correlation. (G) Variant T13243C pass P value cut-off of 0.05 in T test. Red indicates higher mean value in cases with the variants and blue indicates higher mean value in cases without the variant. The size of symbols indicates absolute Z score number. (H) Variants T3086C, T13243C, G17122A, T17407C, G27967T, G27261A and C29095T have P value lower than 0.05 in Pearson correlation. Red and blue indicates positive and negative correlation, respectively. Size of the dots indicate absolute correlation coefficient. (I) After sorting Z score values of Glb, cases with C19637T and C29640T tend to have the highest Z score, whereas

cases with G11083T and T3086C have the lowest.

## 46. GLU (glucose)

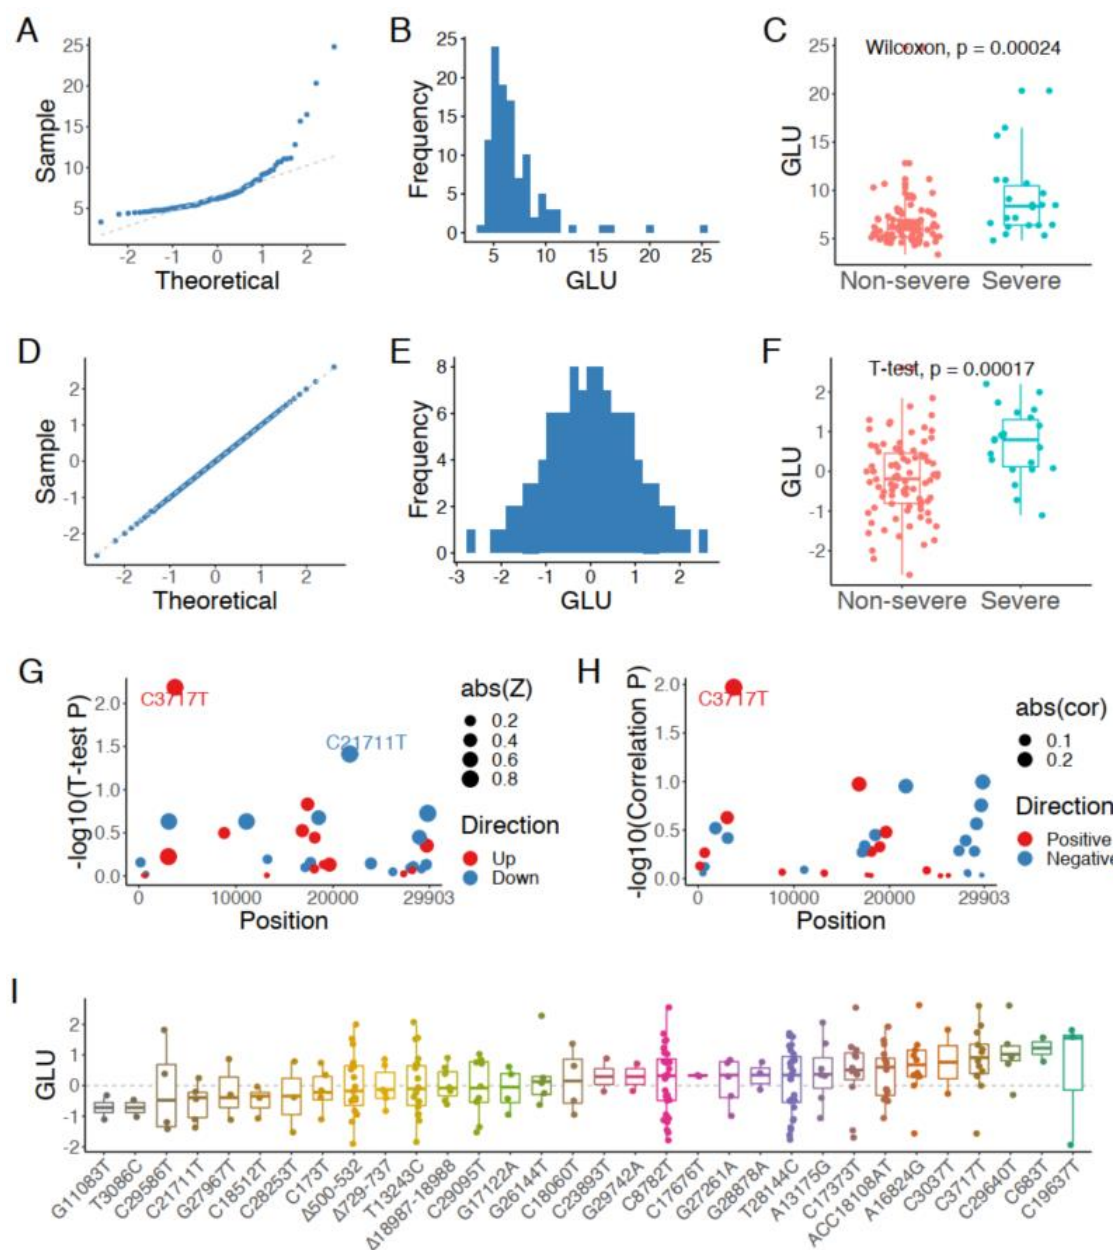

For GLU (glucose, mmol/L), quantile-quantile (QQ) plot and distribution plot before (A and B) and after normalization (D and E) were shown. We compared GLU in the non-severe and severe COVID-19 patients before (C,  $p = 2.4 \times 10^{-4}$ , Wilcoxon test) and after normalization (F,  $p = 1.7 \times 10^{-4}$ , T-test). We further performed association analyses between the 35 genetic variants and GLU using T-test and Pearson correlation. (G) Variants C3717T and C21711T pass P value cut-off of 0.05 in T test. Red indicates higher mean value in cases with the variants and blue indicates higher mean value in cases without the variant. The size of symbols indicates absolute Z score number. (H) Variant C3717T has P value lower than 0.05 in Pearson correlation. Red and blue indicates positive and negative correlation, respectively. Size of the dots indicate absolute correlation coefficient. (I) After sorting Z score values of GLU, cases with C19637T

and C683T tend to have the highest Z score, whereas cases with G11083T and T3086C have the lowest.

## 47. NEUT (neutrophil count)

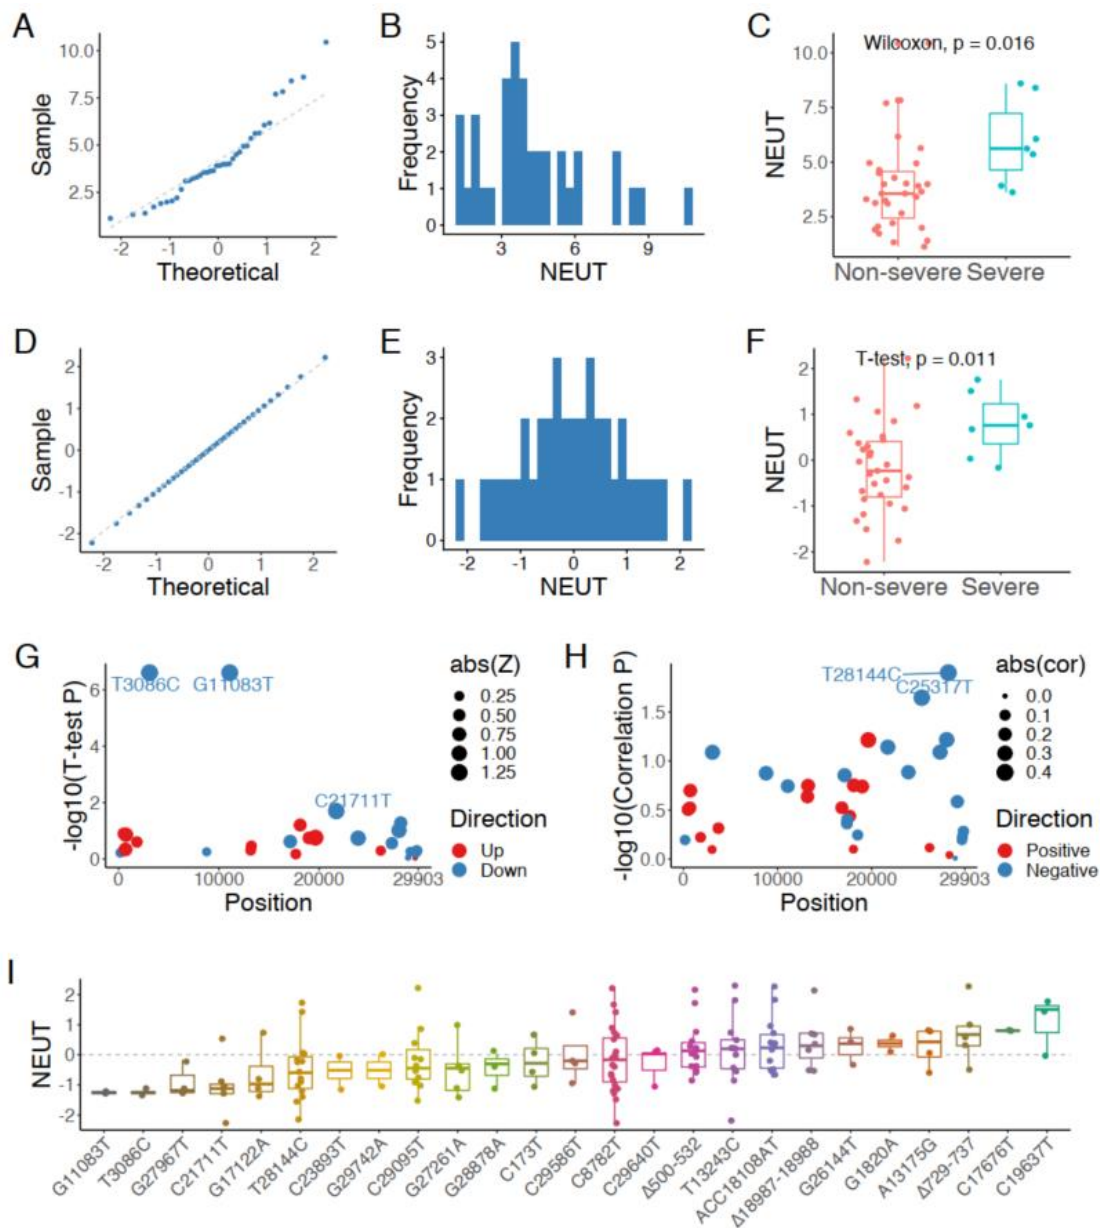

For NEUT (neutrophil count,  $\times 10^9/L$ ), quantile-quantile (QQ) plot and distribution plot before (A and B) and after normalization (D and E) were shown. We compared GLU in the non-severe and severe COVID-19 patients before (C,  $p = 1.6 \times 10^{-2}$ , Wilcoxon test) and after normalization (F,  $p = 1.1 \times 10^{-2}$ , T-test). We further performed association analyses between the 35 genetic variants and NEUT using T-test and Pearson correlation. (G) Variants T3086C, G11083T and C21711T pass P value cut-off of 0.05 in T test. Red indicates higher mean value in cases with the variants and blue indicates higher mean value in cases without the variant. The size of symbols indicates absolute Z score number. (H) Variants T28144C and C25317T have P value lower than 0.05 in Pearson correlation. Red and blue indicates positive and negative correlation, respectively. Size of the dots indicate absolute correlation coefficient. (I) After sorting Z score

values of NEUT, cases with C19637T and C17676T tend to have the highest Z score, whereas cases with T3086C and G27967T have the lowest.

#### 48. HBDH ( $\alpha$ -Hydroxybutyrate dehydrogenase)

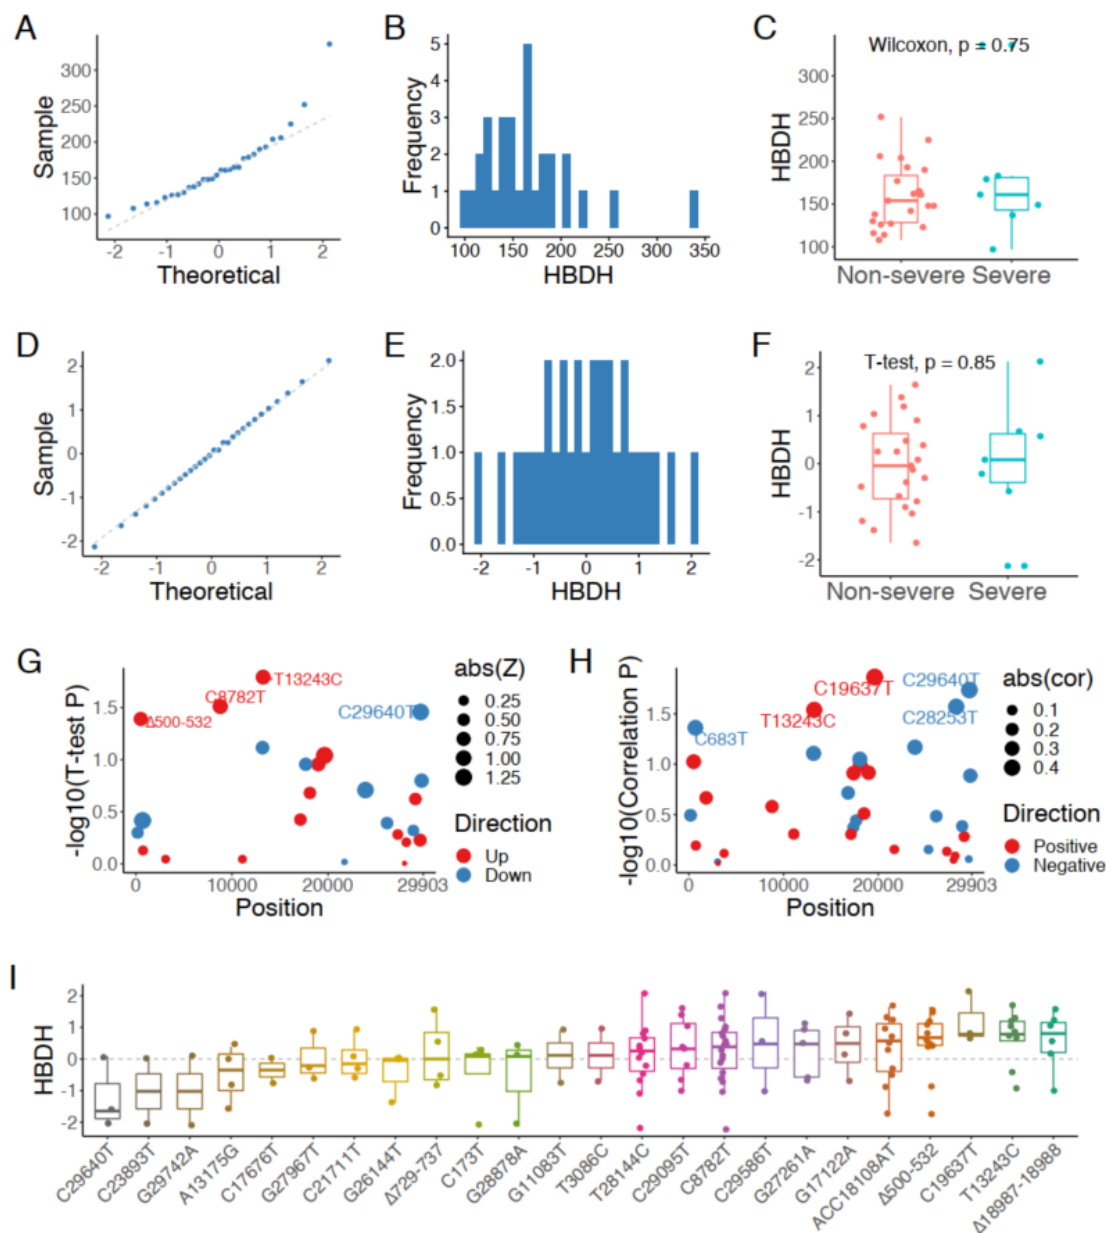

For HBDH ( $\alpha$ -Hydroxybutyrate dehydrogenase, U/L), quantile-quantile (QQ) plot and distribution plot before (A and B) and after normalization (D and E) were shown. We compared HBDH in the non-severe and severe COVID-19 patients before (C,  $p = 0.75$ , Wilcoxon test) and after normalization (F,  $p = 0.85$ , T-test). We further performed association analyses between the 35 genetic variants and HBDH using T-test and Pearson correlation. (G) Variants  $\Delta 500-532$ , C8782T, T13243C and C29640T pass P value cut-off of 0.05 in T test. Red indicates higher mean value in cases with the variants and blue indicates higher mean value in cases without the variant. The size of symbols indicates absolute Z score number. (H) Variants C683T, T13243C, C19637T, C29640T and C28253T have P value lower than 0.05 in Pearson correlation. Red and

blue indicates positive and negative correlation, respectively. Size of the dots indicate absolute correlation coefficient. **(I)** After sorting Z score values of HBDH, cases with  $\Delta 18987-18988$  and T13243C tend to have the highest Z score, whereas cases with C29640T and C23893T have the lowest.

#### 49. HCO<sub>3</sub><sup>-</sup> (bicarbonate)

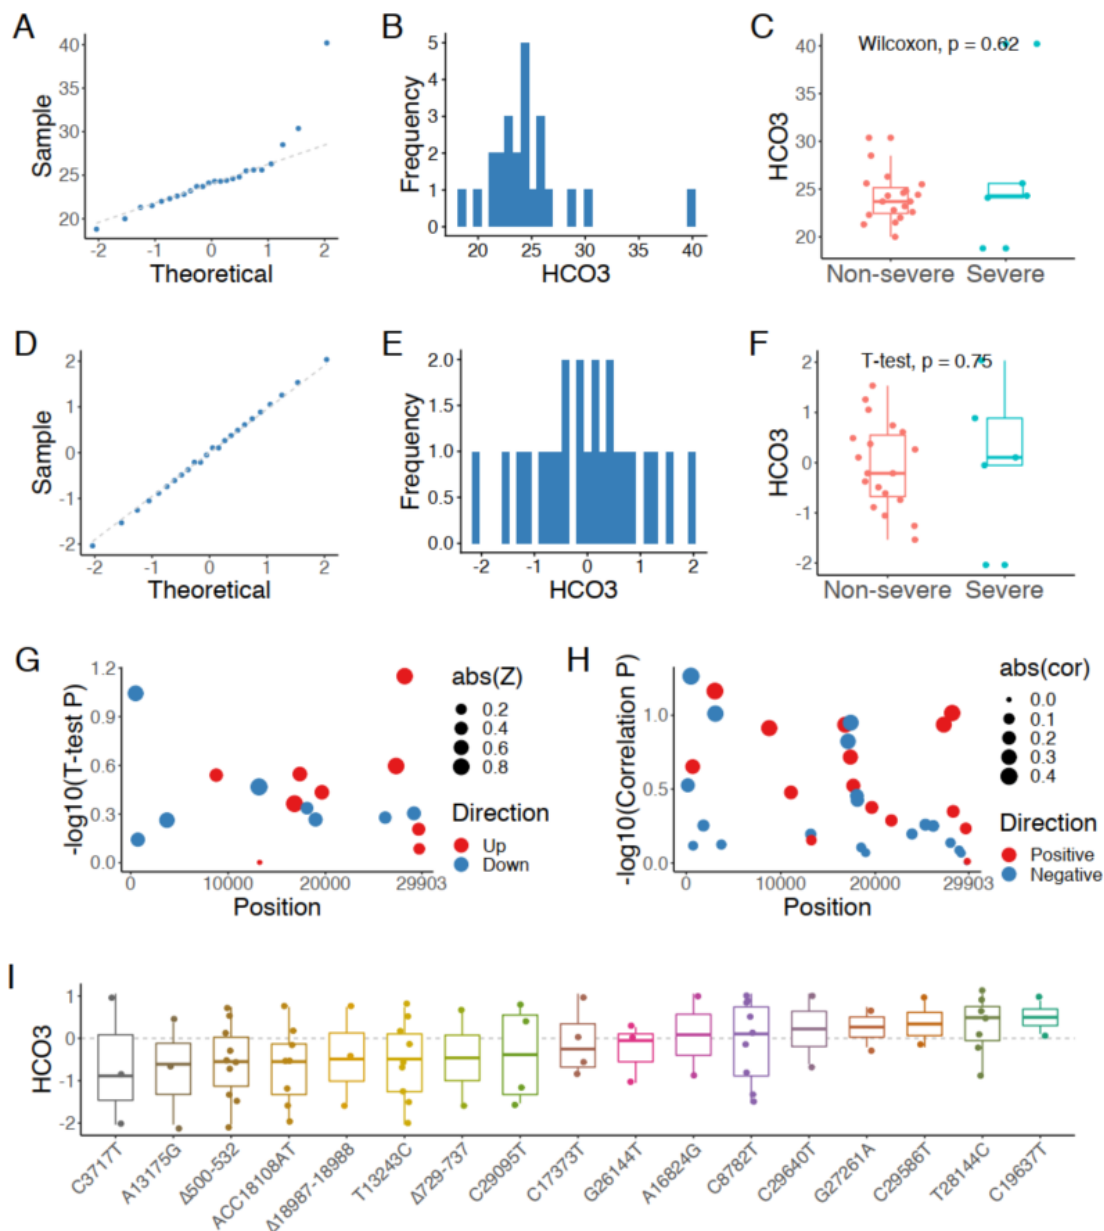

For HCO<sub>3</sub> (bicarbonate, mEq/L), quantile-quantile (QQ) plot and distribution plot before (A and B) and after normalization (D and E) were shown. We compared mEq/L in the non-severe and severe COVID-19 patients before (C,  $p = 0.62$ , Wilcoxon test) and after normalization (F,  $p = 0.75$ , T-test). We further performed association analyses between the 35 genetic variants and mEq/L using T-test and Pearson correlation. (G) No variant in the T test (G) and Pearson correlation was with P value below 0.05 (H). After sorting Z score values of HCO<sub>3</sub>, cases with C19637T and T28144C tend to have the highest Z score, whereas cases with C3717T and A13175G have the lowest.

## 50. HDL-C (high-density lipoprotein cholesterol)

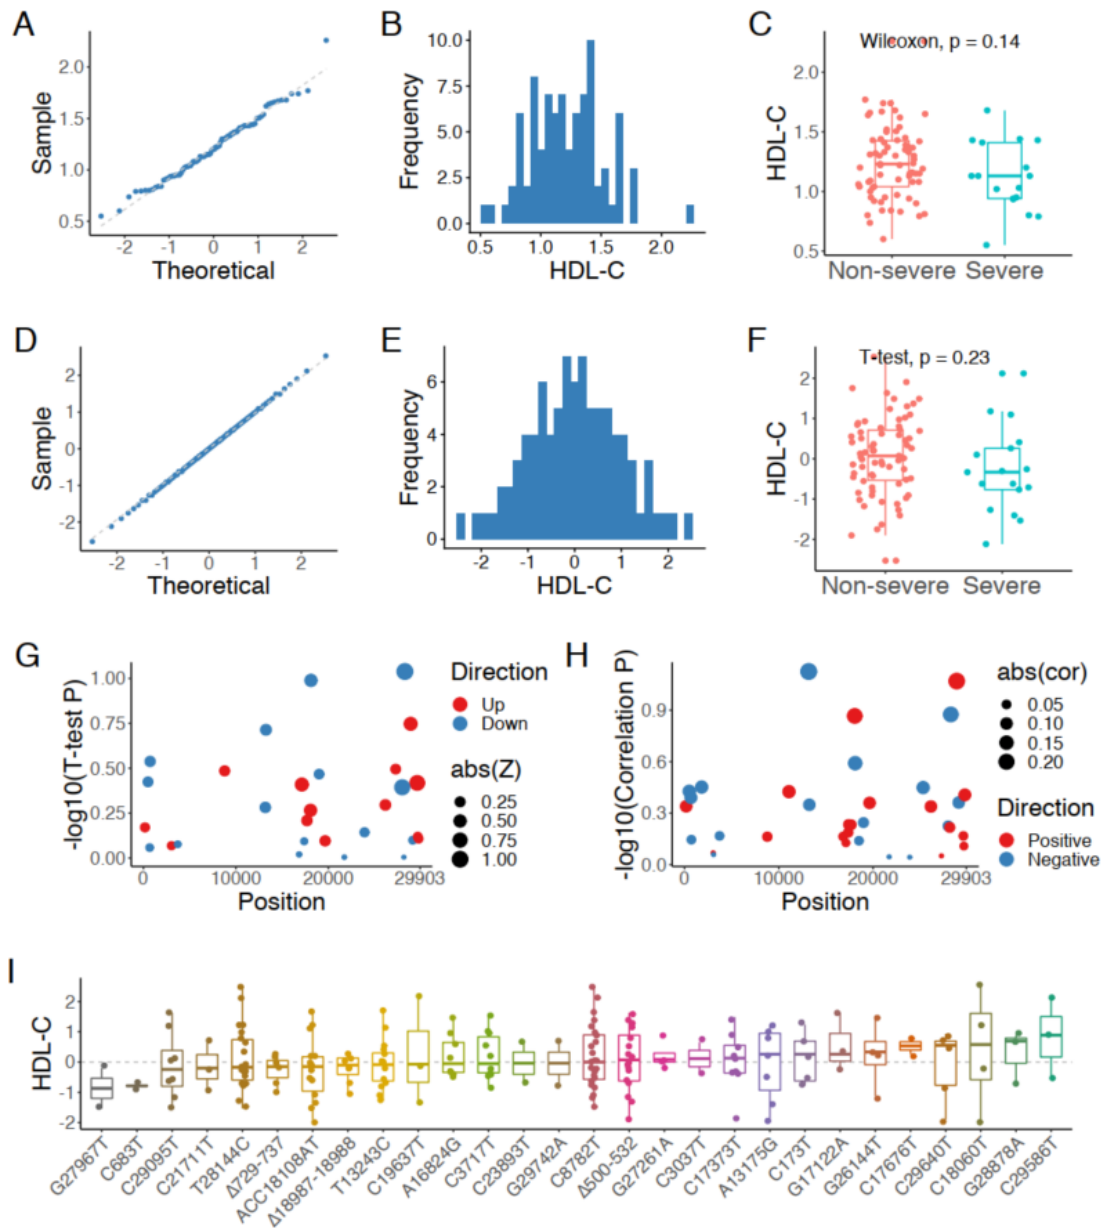

For HDL-C (high-density lipoprotein cholesterol, mmol/L), quantile-quantile (QQ) plot and distribution plot before (A and B) and after normalization (D and E) were shown. We compared HDL-C in the non-severe and severe COVID-19 patients before (C,  $p = 0.14$ , Wilcoxon test) and after normalization (F,  $p = 0.23$ , T-test). We further performed association analyses between the 35 genetic variants and HDL-C using T-test and Pearson correlation. (G) No variant in the T test (G) and Pearson correlation was with P value below 0.05 (H). After sorting Z score values of HDL-C, cases with C29586T and G28878A tend to have the highest Z score, whereas cases with G27967T and C683T have the lowest.

## 51. Hgb (hemoglobin)

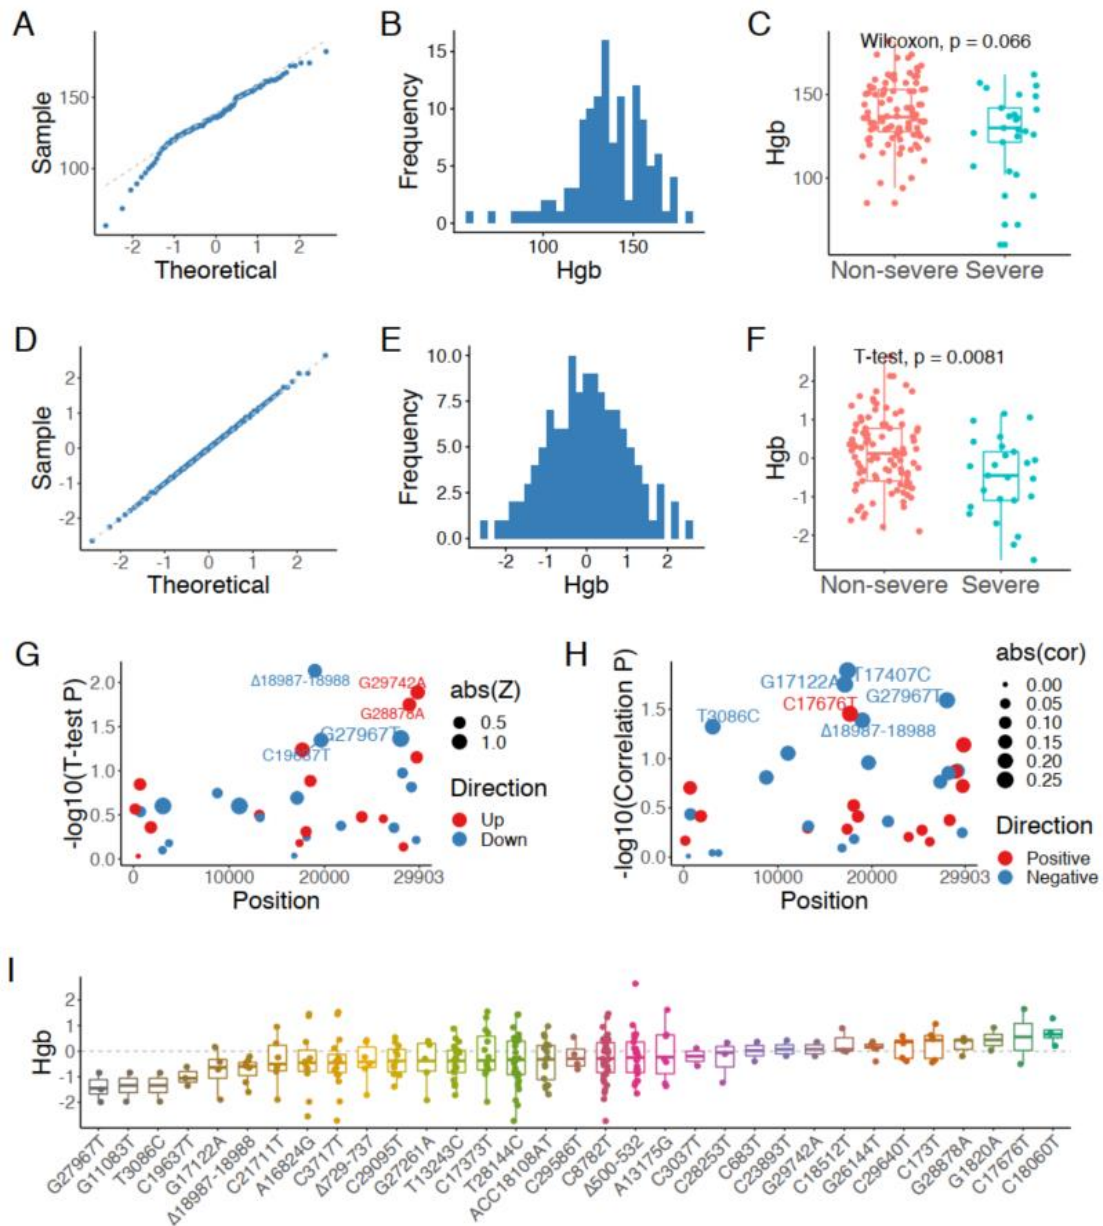

For Hgb (hemoglobin, g/L), quantile-quantile (QQ) plot and distribution plot before (**A** and **B**) and after normalization (**D** and **E**) were shown. We compared Hgb in the non-severe and severe COVID-19 patients before (**C**,  $p = 6.6 \times 10^{-2}$ , Wilcoxon test) and after normalization (**F**,  $p = 8.1 \times 10^{-3}$ , T-test). (**G**) Variants C19637T, G27967T, G28878A, G29742A and  $\Delta 18987-18988$  pass P value cut-off of 0.05 in T test. Red indicates higher mean value in cases with the variants and blue indicates higher mean value in cases without the variant. The size of symbols indicates absolute Z score number. (**H**) Variants T3086C, G17122A, C17676T, T17407C, G27967T and  $\Delta 18987-18988$  have P value lower than 0.05 in Pearson correlation. Red and blue indicates positive and negative correlation, respectively. Size of the dots indicate absolute correlation coefficient. (**I**) After sorting Z score values of Hgb, cases with C18060T and C17676T tend to have the highest Z score, whereas cases with G27967T and G11083T have the lowest.

## 52. HR (heart rate)

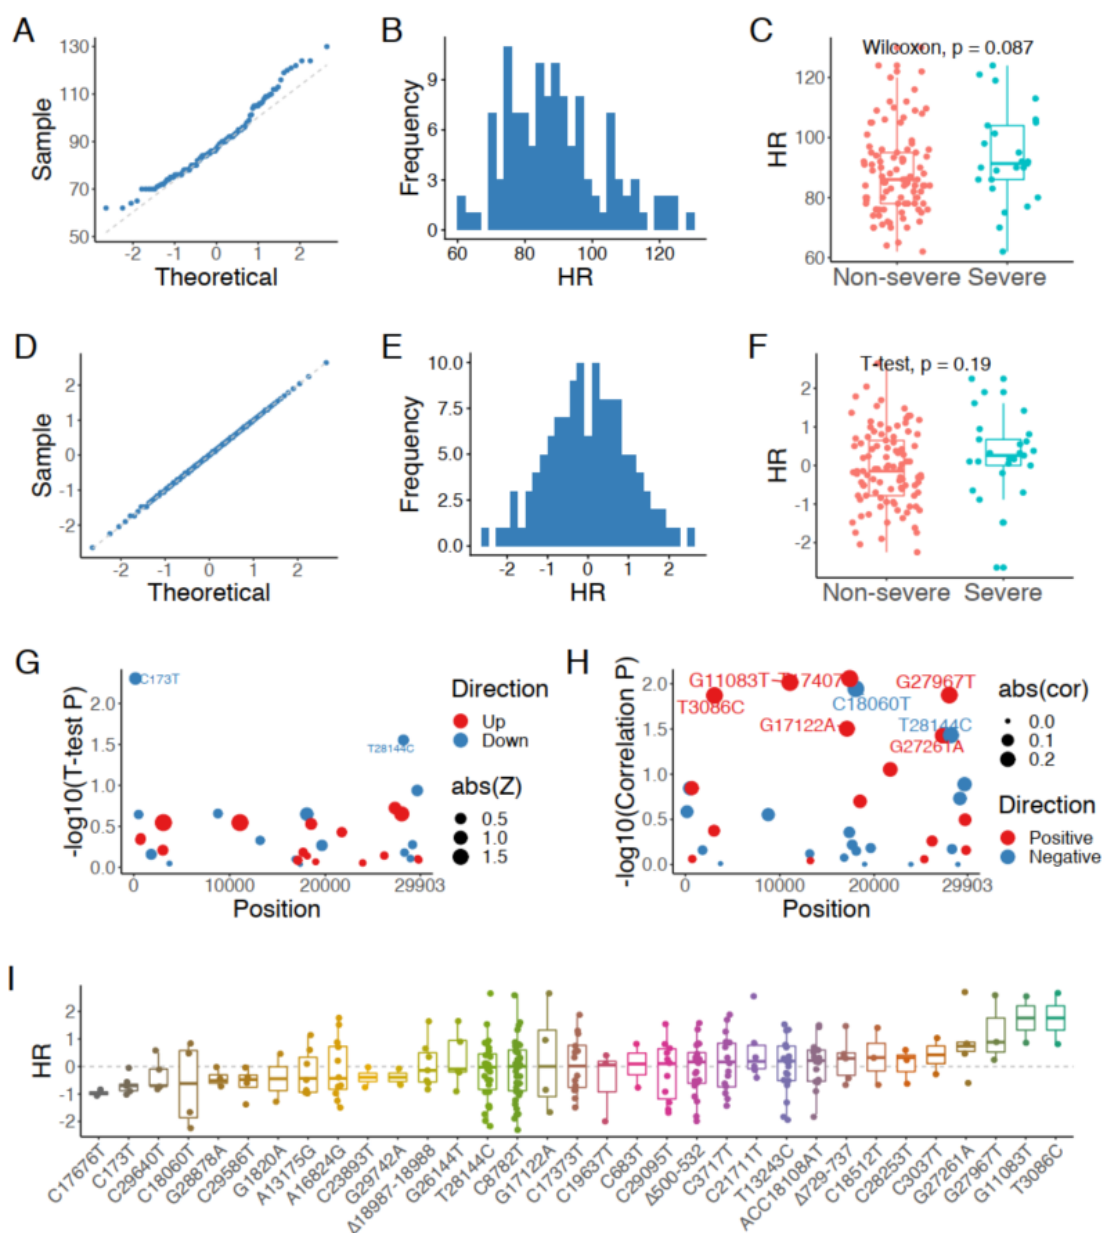

For HR (heart rate, times/min), quantile-quantile (QQ) plot and distribution plot before (**A** and **B**) and after normalization (**D** and **E**) were shown. We compared HR in the non-severe and severe COVID-19 patients before (**C**,  $p = 8.7 \times 10^{-2}$ , Wilcoxon test) and after normalization (**F**,  $p = 0.19$ , T-test). (**G**) Variants C173T and T28144C pass P value cut-off of 0.05 in T test. Red indicates higher mean value in cases with the variants and blue indicates higher mean value in cases without the variant. The size of symbols indicates absolute Z score number. (**H**) Variants T3086C, G11083T, T17407C, G17122A, C18060T, G27967T, T28144C and G27261A have P value lower than 0.05 in Pearson correlation. Red and blue indicates positive and negative correlation, respectively. Size of the dots indicate absolute correlation coefficient. (**I**) After sorting Z score values of HR, cases with T3086C and G11083T tend to have the highest Z score, whereas cases with C17676T and C173T have the lowest.



### 53. hs-CRP (hypersensitive C-reactive protein)

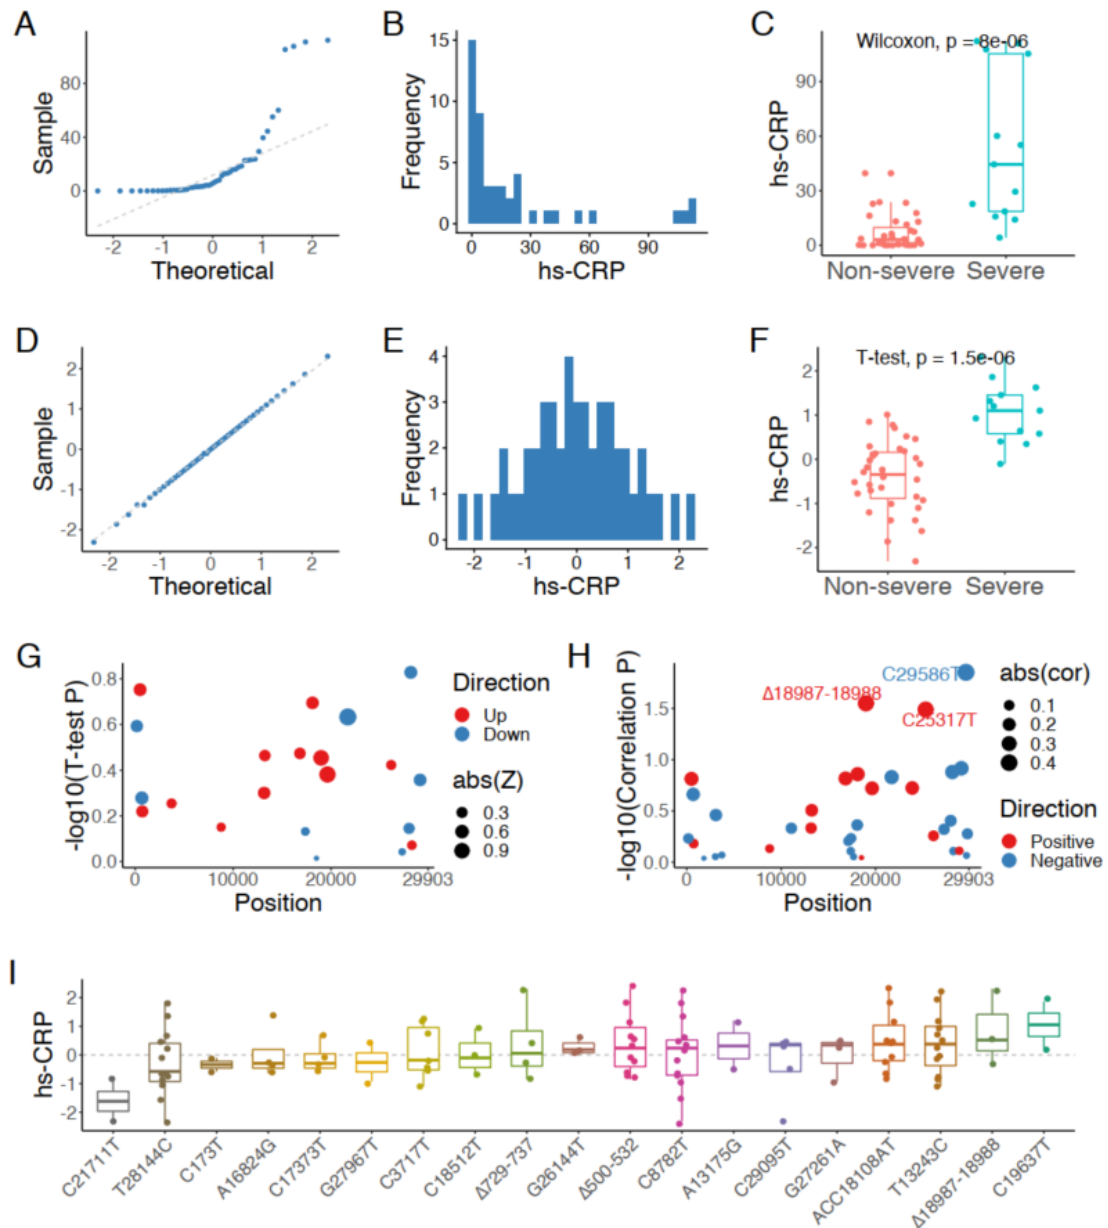

For hs-CRP (hypersensitive C-reactive protein, mg/L), quantile-quantile (QQ) plot and distribution plot before (A and B) and after normalization (D and E) were shown. We compared hs-CRP in the non-severe and severe COVID-19 patients before (C,  $p = 8.0 \times 10^{-6}$ , Wilcoxon test) and after normalization (F,  $p = 1.5 \times 10^{-6}$ , T-test). We further performed association analyses between the 35 genetic variants and hs-CRP using T-test and Pearson correlation. (G) No variant passes P value cut-off of 0.05 in T test. Red indicates higher mean value in cases with the variants and blue indicates higher mean value in cases without the variant. The size of symbols indicates absolute Z score number. (H) Variants  $\Delta 18987-18988$ , C29586T and C25317T have P value lower than 0.05 in Pearson correlation. Red and blue indicates positive and negative correlation, respectively. Size of the dots indicate absolute correlation coefficient. (I) After sorting Z score values of hs-CRP, cases with C19637T and  $\Delta 18987-18988$  tend to have the highest Z score, whereas cases with C21711T and T28144C have the lowest.

## 54. IBil (indirect bilirubin)

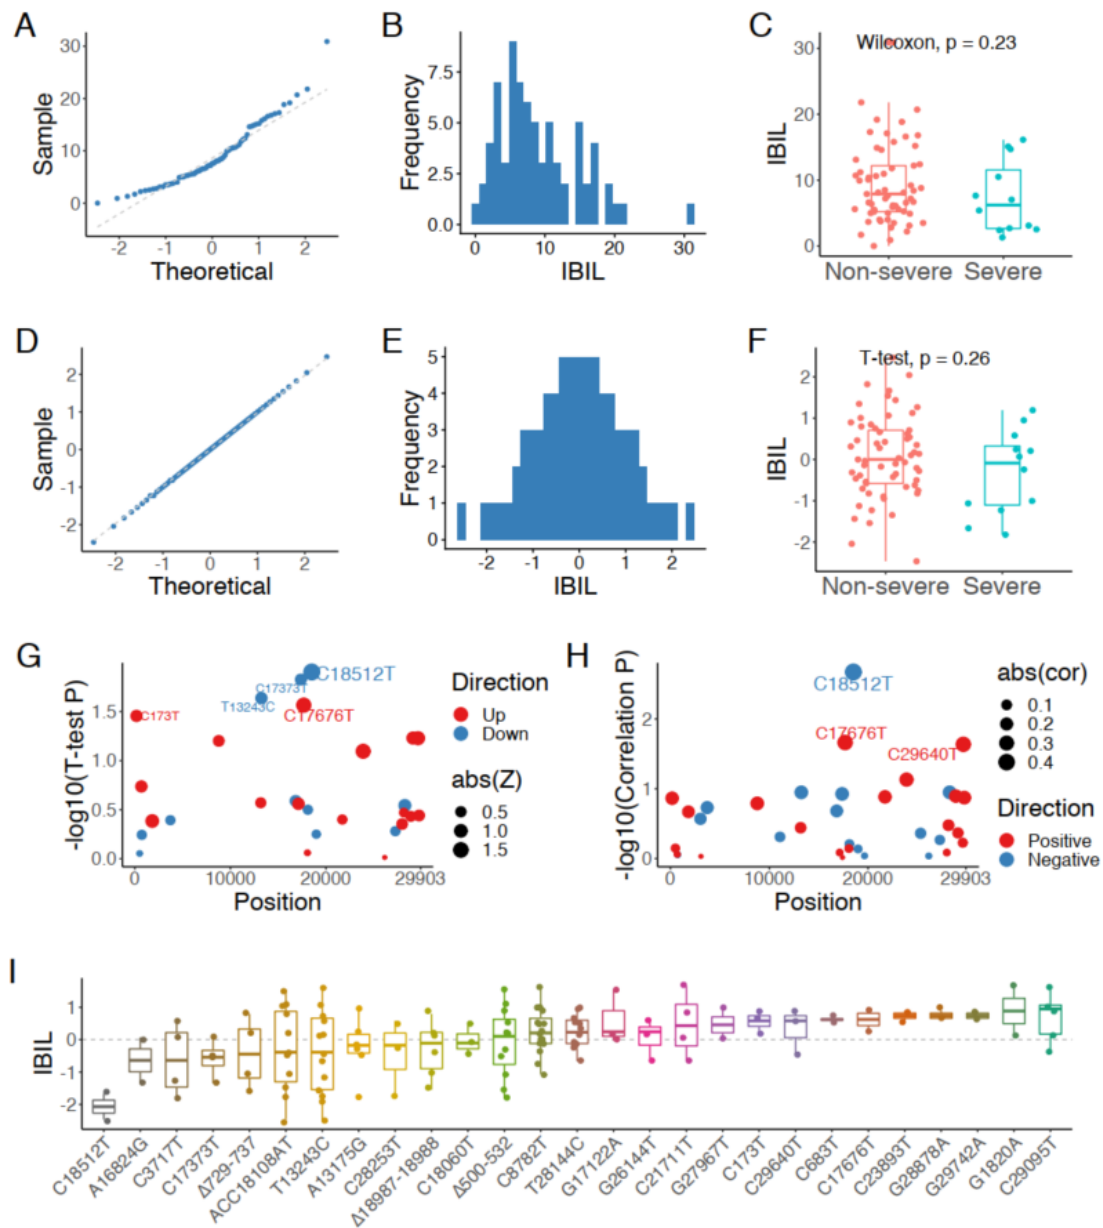

For IBil (indirect bilirubin,  $\mu\text{mol/L}$ ), quantile-quantile (QQ) plot and distribution plot before (A and B) and after normalization (D and E) were shown. We compared IBil in the non-severe and severe COVID-19 patients before (C,  $p = 0.23$ , Wilcoxon test) and after normalization (F,  $p = 0.26$ , T-test). We further performed association analyses between the 35 genetic variants and IBil using T-test and Pearson correlation. (G) Variants C173T, T13243C, C17373T, C17676T and C18512T pass P value cut-off of 0.05 in T test. Red indicates higher mean value in cases with the variants and blue indicates higher mean value in cases without the variant. The size of symbols indicates absolute Z score number. (H) Variants C17676T, C18512T and C29640T have P value lower than 0.05 in Pearson correlation. Red and blue indicates positive and negative correlation, respectively. Size of the dots indicate absolute correlation coefficient. (I) After sorting Z score values of IBil, cases with C29095T and G1820A tend to have the highest Z score, whereas cases with C18512T and A16824G have the lowest.

## 55. IFN- $\alpha$ (interferon alpha)

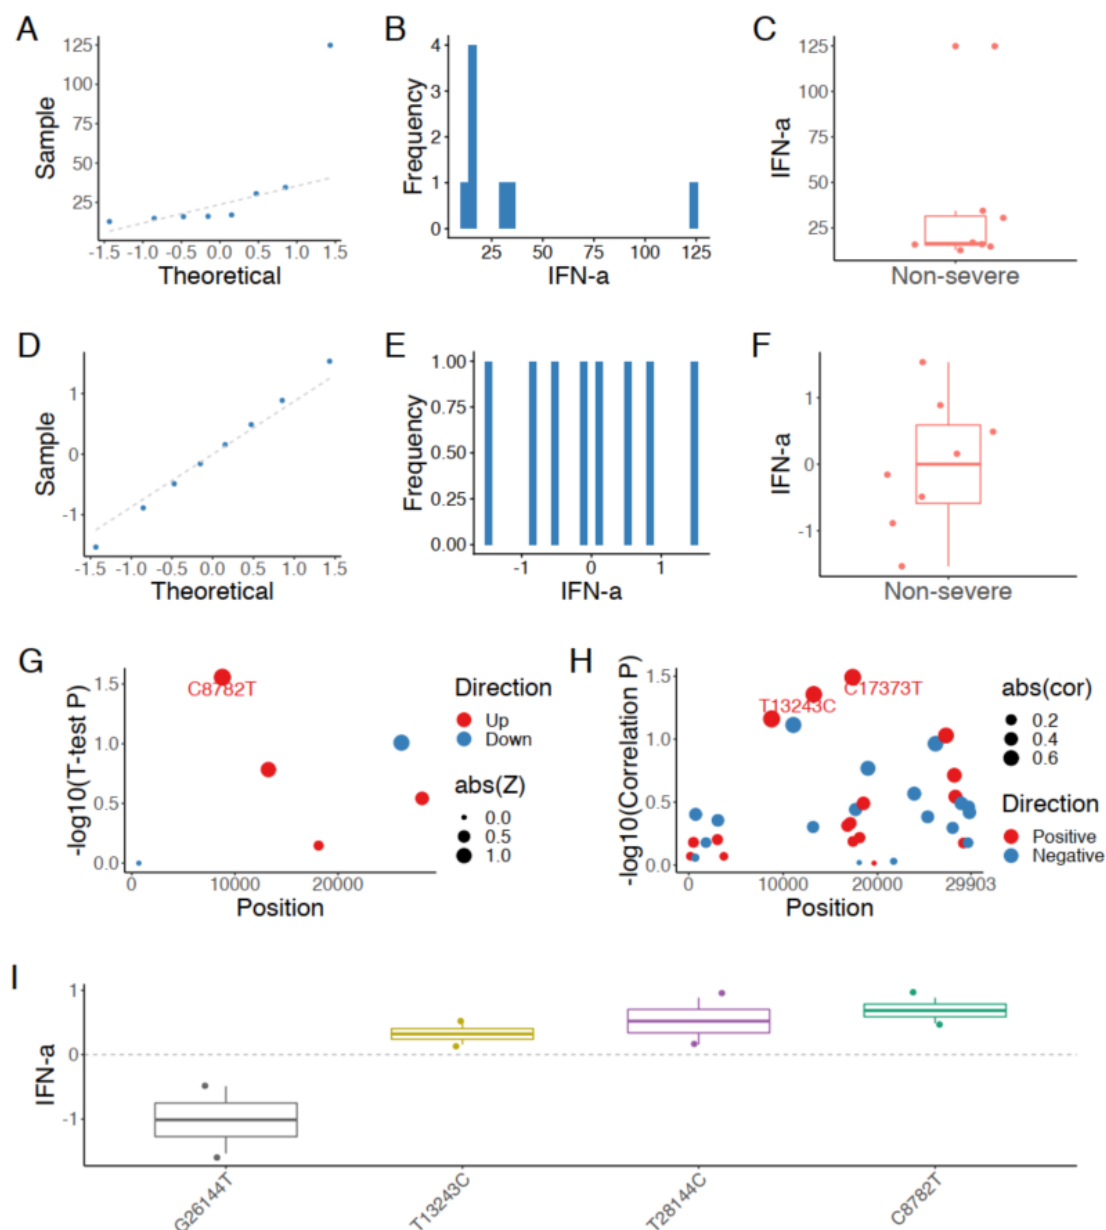

For IFN- $\alpha$  (interferon alpha, pg/ml), quantile-quantile (QQ) plot and distribution plot before (A and B) and after normalization (D and E) were shown. We compared IFN- $\alpha$  in the non-severe and severe COVID-19 patients before (C) and after normalization (F). We further performed association analyses between the 35 genetic variants and IFN- $\alpha$  using T-test and Pearson correlation. (G) Variant C8782T passes P value cut-off of 0.05 in T test. Red indicates higher mean value in cases with the variants and blue indicates higher mean value in cases without the variant. The size of symbols indicates absolute Z score number. (H) Variants T13243C and C17373T have P value lower than 0.05 in Pearson correlation. Red and blue indicates positive and negative correlation, respectively. Size of the dots indicate absolute correlation coefficient. (I) After sorting Z score values of IFN- $\alpha$ , cases with C8782T and T28144C tend to have the highest Z score, whereas cases with G26144T and T13243C have the lowest.

## 56. IFN $\alpha$ 2 (interferon alpha-2)

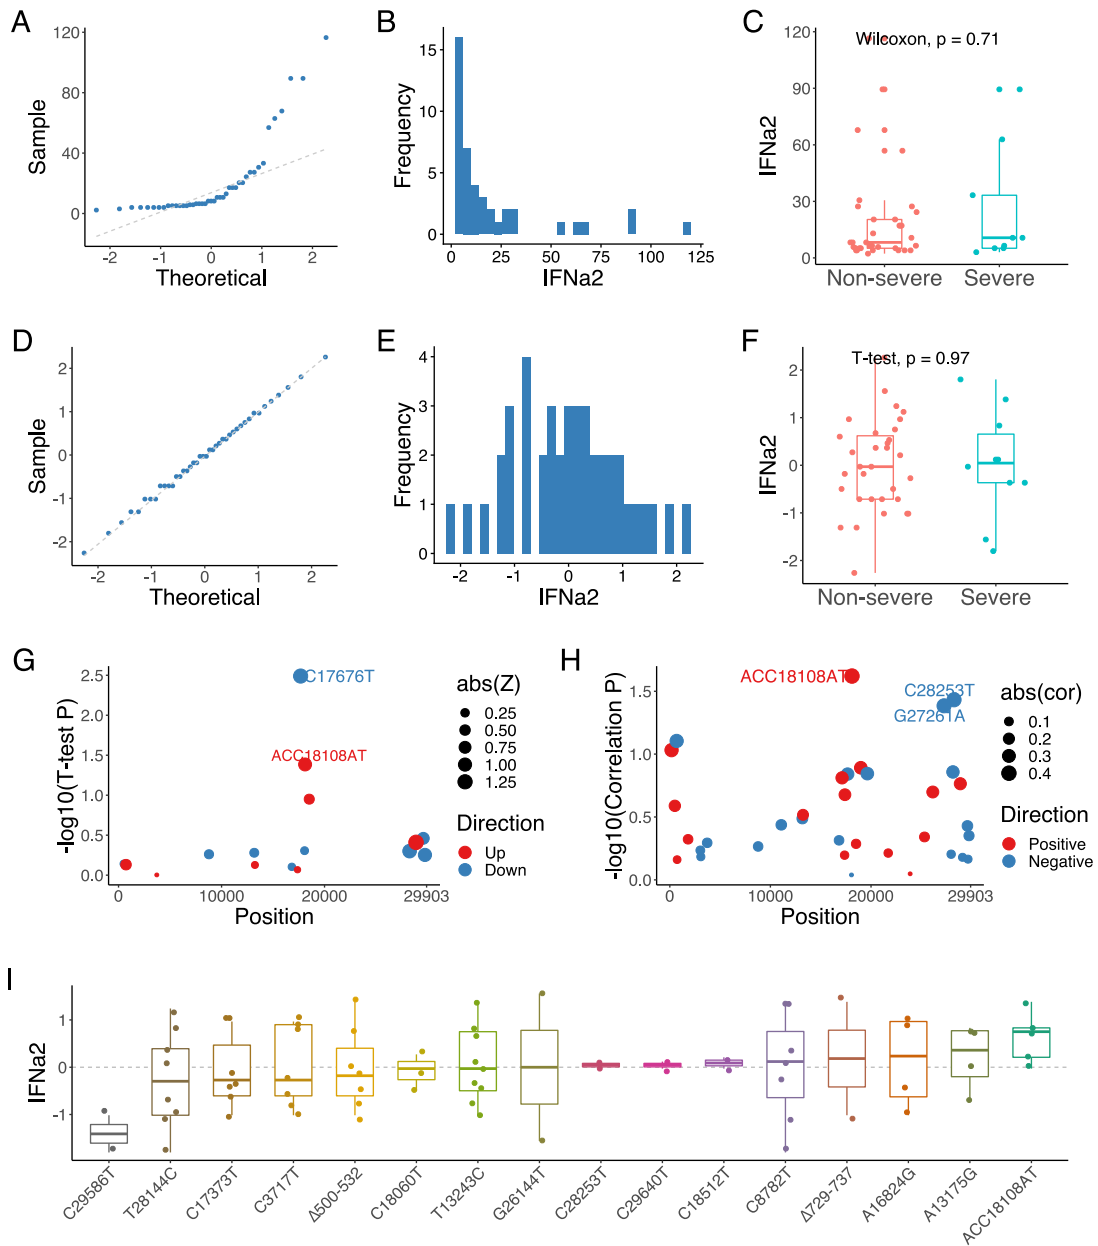

For IFN $\alpha$ 2 (interferon alpha-2, pg/ml), quantile-quantile (QQ) plot and distribution plot before (A and B) and after normalization (D and E) were shown. We compared IFN $\alpha$ 2 in the non-severe and severe COVID-19 patients before (C,  $p = 0.71$ , Wilcoxon test) and after normalization (F,  $p = 0.97$ , T-test). We further performed association analyses between the 35 genetic variants and IFN $\alpha$ 2 using T-test and Pearson correlation. (G) Variants C17676T and ACC18108AT pass P value cut-off of 0.05 in T test. Red indicates higher mean value in cases with the variants and blue indicates higher mean value in cases without the variant. The size of symbols indicates absolute Z score number. (H) Variants ACC18108AT, C28253T and G27261A have P value lower than 0.05 in Pearson correlation. Red and blue indicates positive and negative correlation, respectively. Size of the dots indicate absolute correlation coefficient. (I) After sorting Z score values of IFN $\alpha$ 2, cases with ACC18108AT and A13175G tend to have

the highest Z score, whereas cases with C29586T and T28144C have the lowest.

## 57. IFN- $\beta$ (interferon beta)

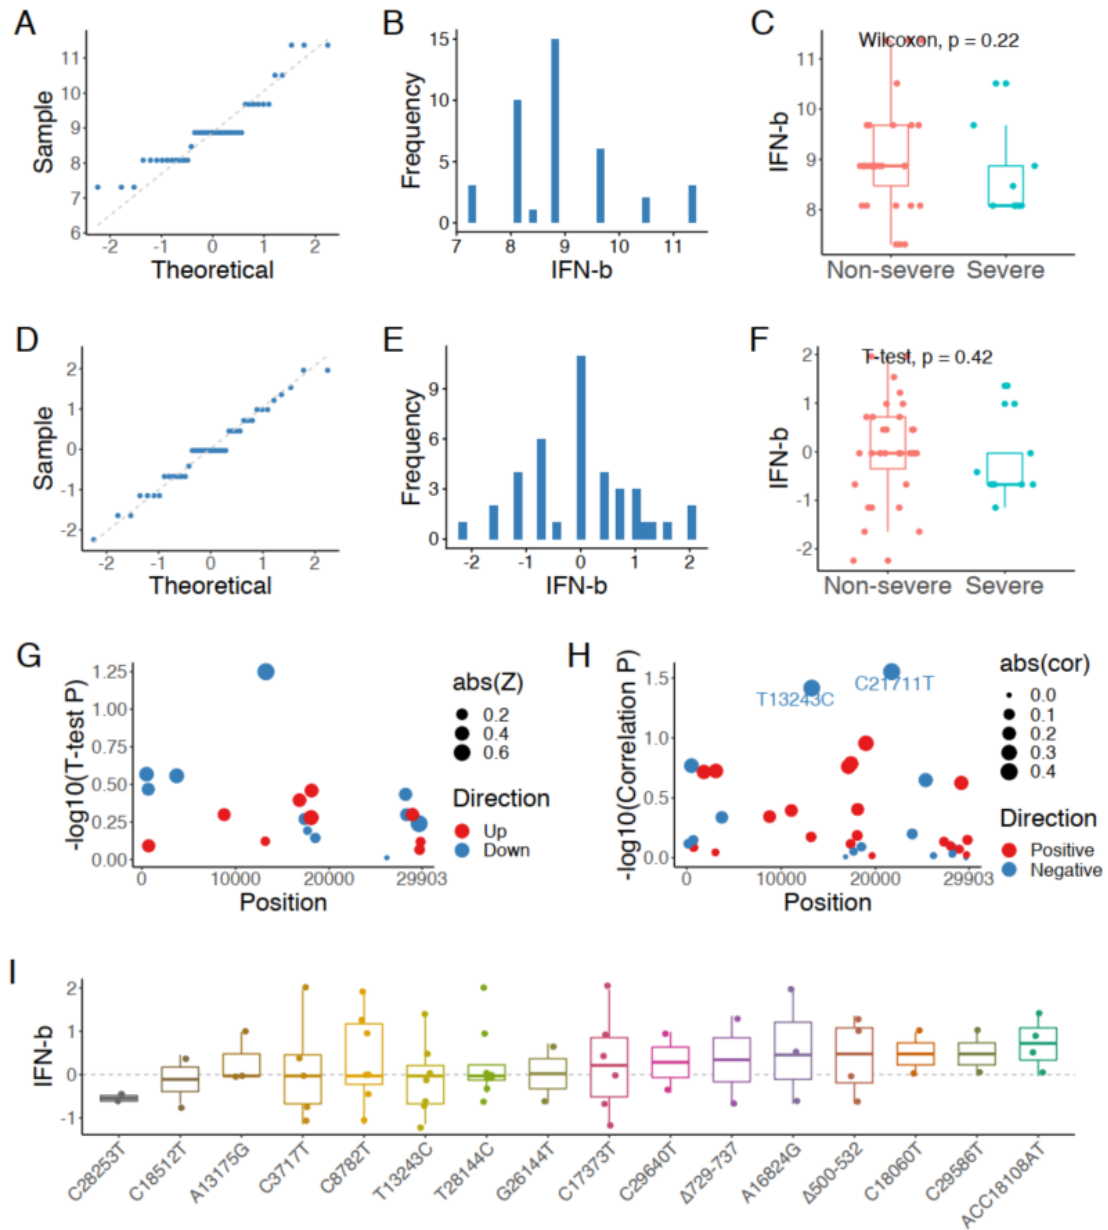

For IFN- $\beta$  (interferon beta, pg/ml), quantile-quantile (QQ) plot and distribution plot before (A and B) and after normalization (D and E) were shown. We compared IFN- $\beta$  in the non-severe and severe COVID-19 patients before (C, p = 0.22, Wilcoxon test) and after normalization (F, p = 0.42, T-test). We further performed association analyses between the 35 genetic variants and IFN- $\beta$  using T-test and Pearson correlation. (G) No variant passes P value cut-off of 0.05 in T test. Red indicates higher mean value in cases with the variants and blue indicates higher mean value in cases without the variant. The size of symbols indicates absolute Z score number. (H) Variants T13243C and C21711T have P value lower than 0.05 in Pearson correlation. Red and blue indicates positive and negative correlation, respectively. Size of the dots indicate absolute correlation coefficient. (I) After sorting Z score values of IFN- $\beta$ , cases with ACC18108AT and C29586T tend to have the highest Z score, whereas cases with C28253T and

C18512T have the lowest.

## 58. IFN- $\gamma$ (interferon gamma)

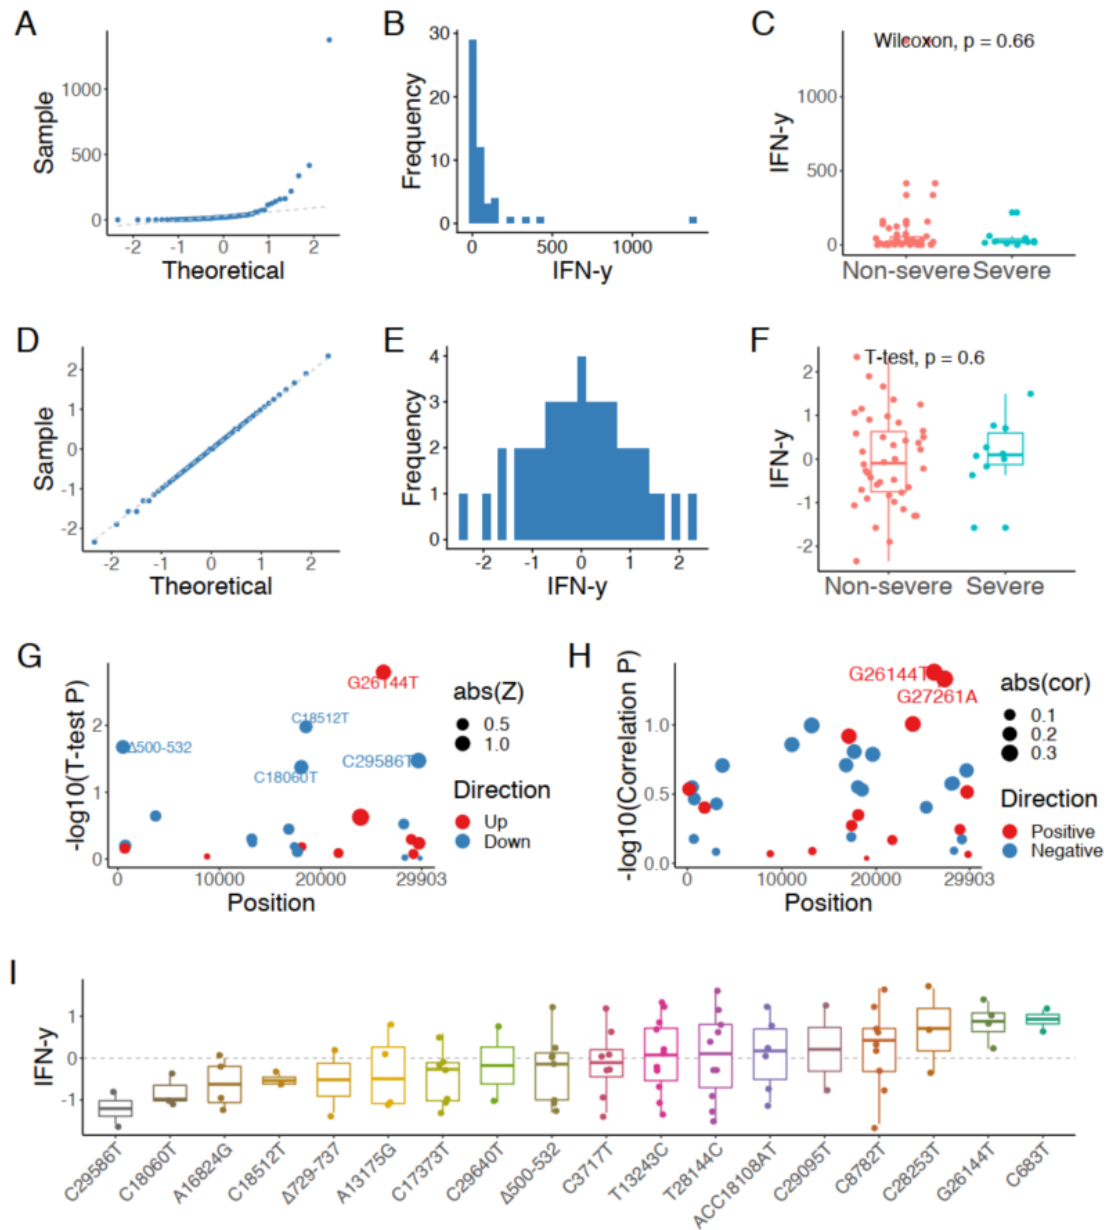

For IFN- $\gamma$  (interferon gamma, pg/ml), quantile-quantile (QQ) plot and distribution plot before (A and B) and after normalization (D and E) were shown. We compared IFN- $\gamma$  in the non-severe and severe COVID-19 patients before (C,  $p = 0.66$ , Wilcoxon test) and after normalization (F,  $p = 0.6$ , T-test). We further performed association analyses between the 35 genetic variants and IFN- $\gamma$  using T-test and Pearson correlation. (G) Variants  $\Delta 500-532$ , C18060T, C18512T, C29586T and G26144T pass P value cut-off of 0.05 in T test. Red indicates higher mean value in cases with the variants and blue indicates higher mean value in cases without the variant. The size of symbols indicates absolute Z score number. (H) Variants G26144T and G27261A have P value lower than 0.05 in Pearson correlation. Red and blue indicates positive and negative correlation, respectively. Size of the dots indicate absolute correlation coefficient. (I) After sorting Z score values of IFN- $\gamma$ , cases with C683T and

G26144T tend to have the highest Z score, whereas cases with C29586T and C18060T have the lowest.

## 59. IL-10 (interleukin 10)

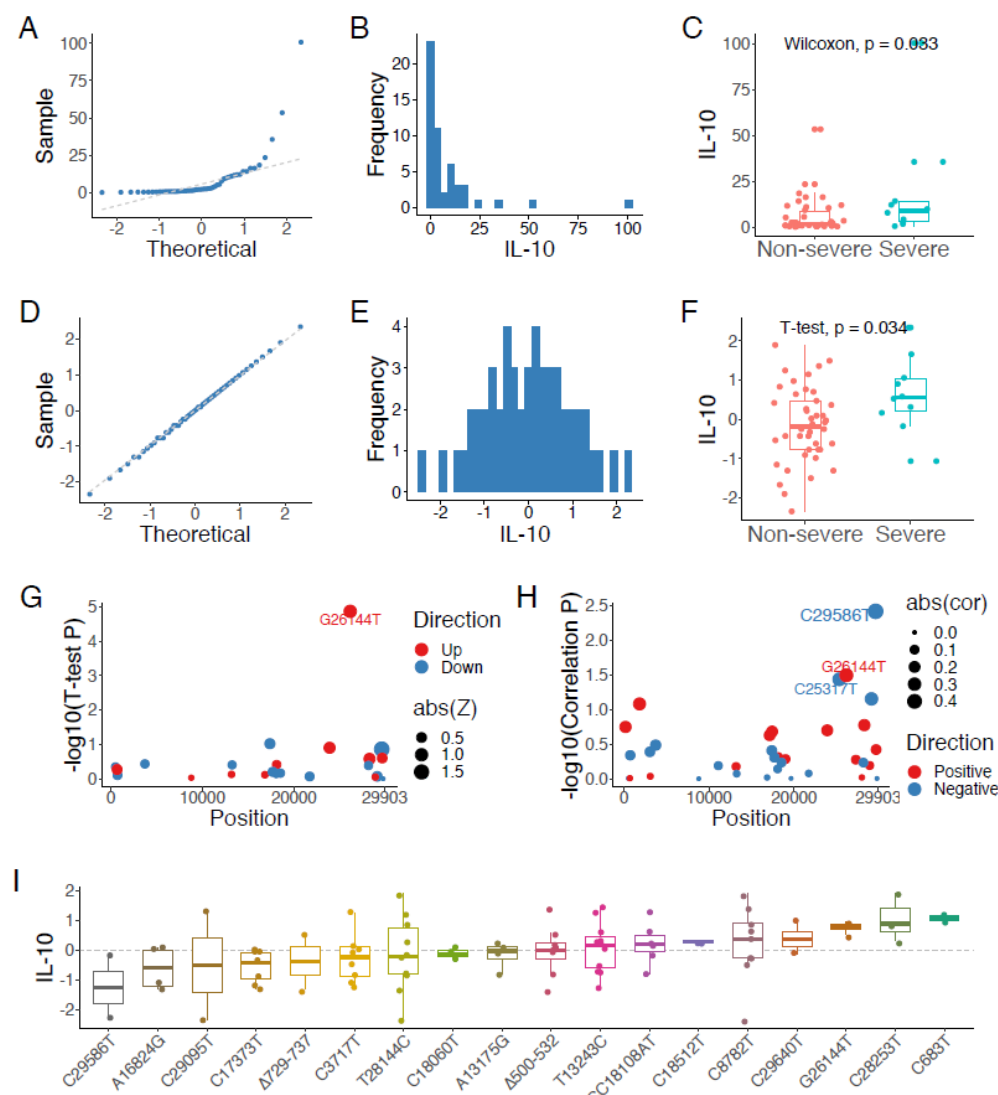

For IL-10 (interleukin 10, pg/ml), quantile-quantile (QQ) plot and distribution plot before (A and B) and after normalization (D and E) were shown. We compared IL-10 in the non-severe and severe COVID-19 patients before (C,  $p = 3.3 \times 10^{-2}$ , Wilcoxon test) and after normalization (F,  $p = 3.4 \times 10^{-2}$ , T-test). We further performed association analyses between the 35 genetic variants and IL-10 using T-test and Pearson correlation. (G) Variant G26144T passes P value cut-off of 0.05 in T test. Red indicates higher mean value in cases with the variants and blue indicates higher mean value in cases without the variant. The size of symbols indicates absolute Z score number. (H) Variants C29586T, G26144T and C25317T have P value lower than 0.05 in Pearson correlation. Red and blue indicates positive and negative correlation, respectively. Size of the dots indicate absolute correlation coefficient. (I) After sorting Z score values of IL-10, cases with C28253T and C683T tend to have the highest Z score, whereas cases with C29586T and A16824G have the lowest.

## 60. IL-13 (interleukin 13)

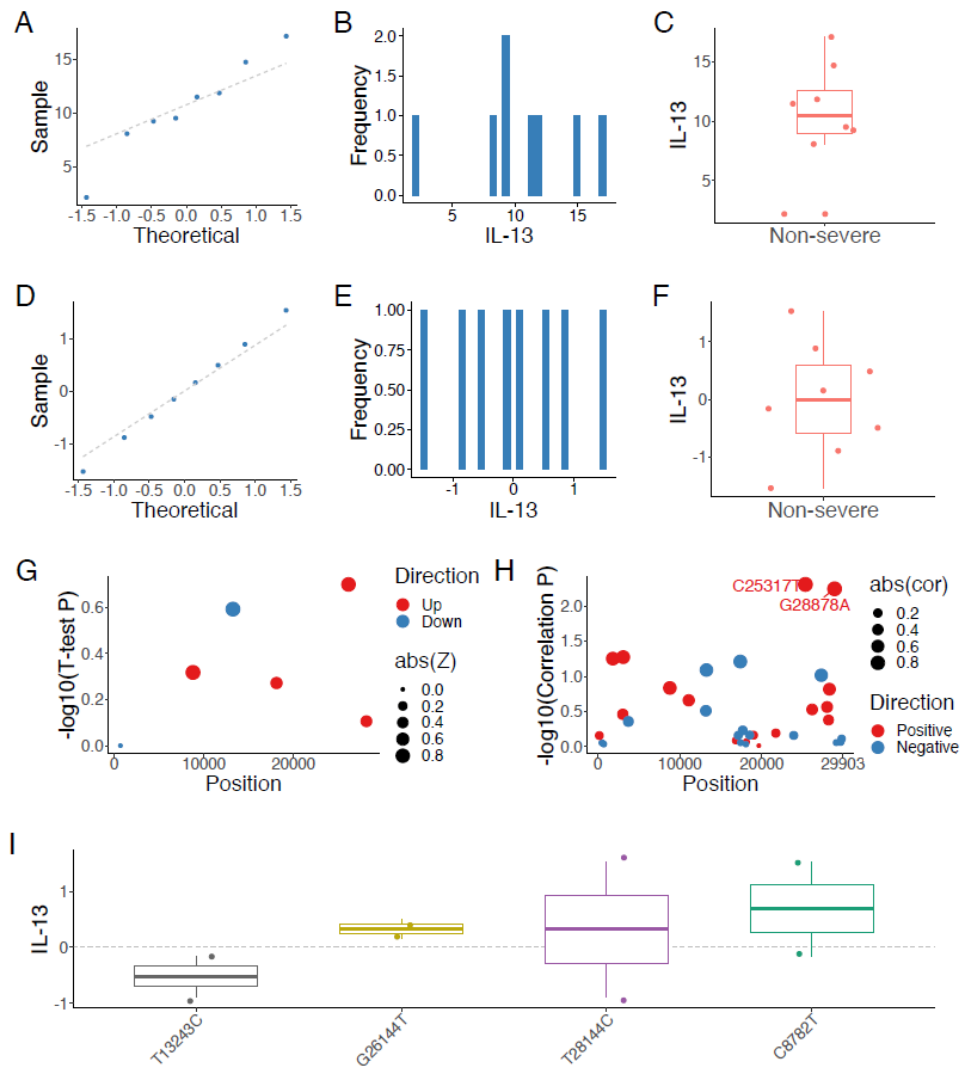

For IL-13 (interleukin 13, pg/ml), quantile-quantile (QQ) plot and distribution plot before (A and B) and after normalization (D and E) were shown. We compared IL-13 in the non-severe and severe COVID-19 patients before (C) and after normalization (F). We further performed association analyses between the 35 genetic variants and IL-13 using T-test and Pearson correlation. (G) No variant passes P value cut-off of 0.05 in T test. Red indicates higher mean value in cases with the variants and blue indicates higher mean value in cases without the variant. The size of symbols indicates absolute Z score number. (H) Variants C25317T and G28878A have P value lower than 0.05 in Pearson correlation. Red and blue indicates positive and negative correlation, respectively. Size of the dots indicate absolute correlation coefficient. (I) After sorting Z score values of IL-13, cases with C8782T and T28144C tend to have the highest Z score, whereas cases with T13243C have the lowest.



## 61. IL-17A (interleukin 17A)

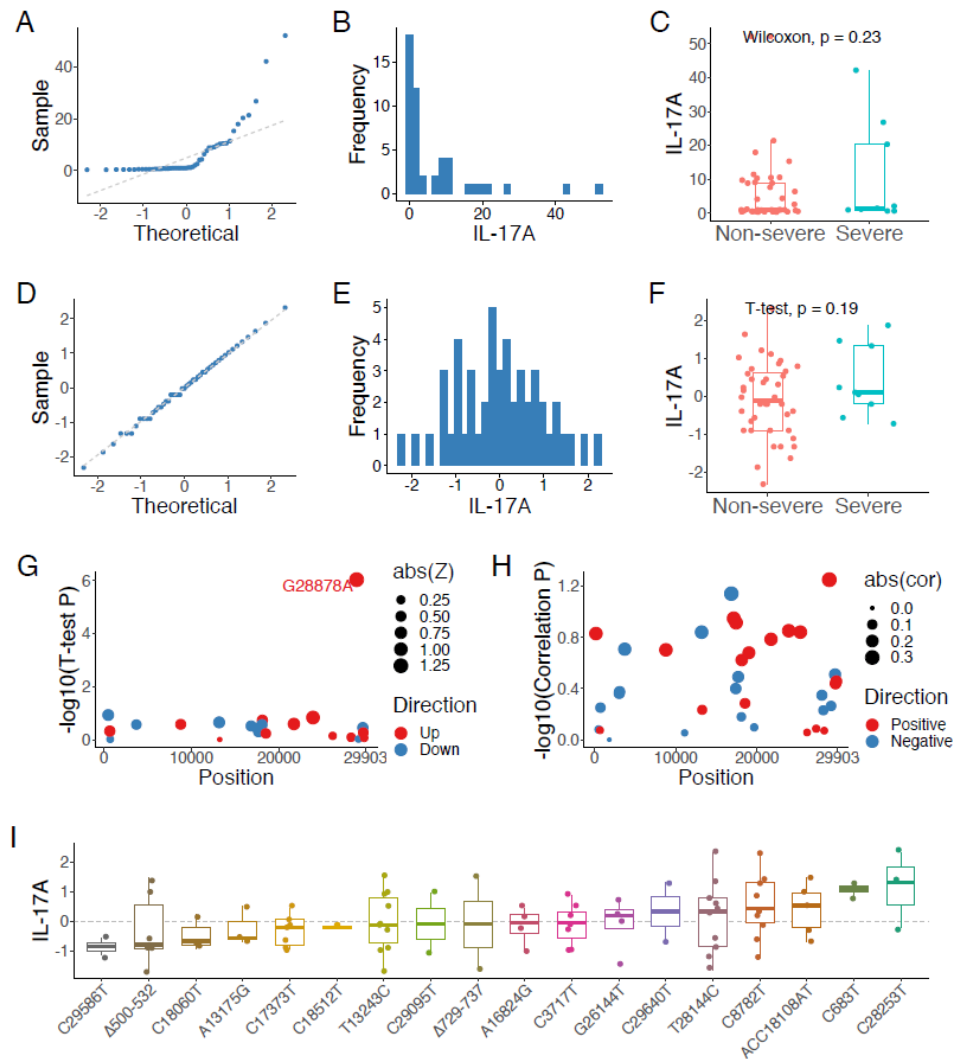

For IL-17A (interleukin 17A, pg/ml), quantile-quantile (QQ) plot and distribution plot before (A and B) and after normalization (D and E) were shown. We compared IL-17A in the non-severe and severe COVID-19 patients before (C,  $p = 0.23$ , Wilcoxon test) and after normalization (F,  $p = 0.19$ , T-test). We further performed association analyses between the 35 genetic variants and IL-17A using T-test and Pearson correlation. (G) Variant G28878A passes P value cut-off of 0.05 in T test. Red indicates higher mean value in cases with the variants and blue indicates higher mean value in cases without the variant. The size of symbols indicates absolute Z score number. (H) No variant in Pearson correlation was has P value below 0.05. After sorting Z score values of IL-17A, cases with C28253T and C683T tend to have the highest Z score, whereas cases with C29586T and Δ500-532 have the lowest.

## 62. IL-17E (interleukin 17E)

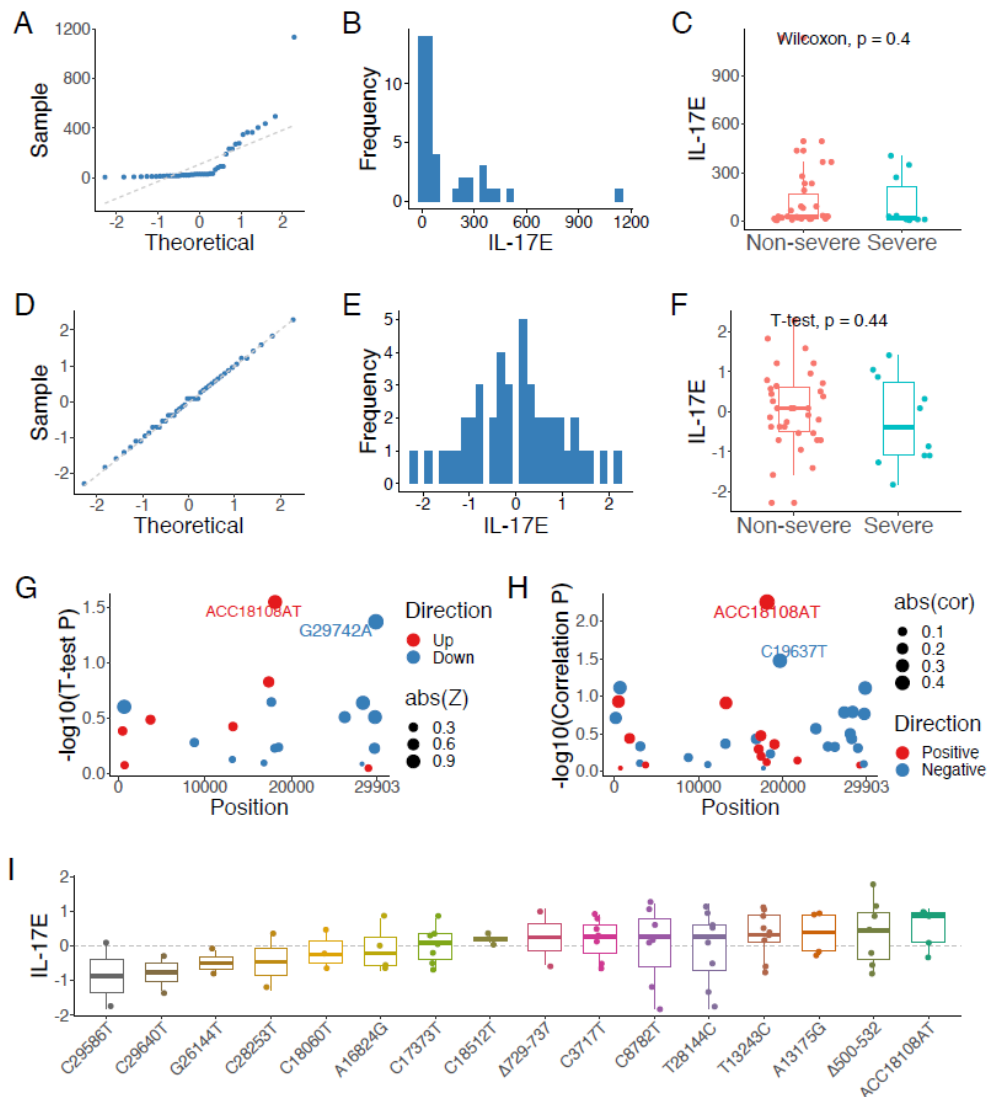

For IL-17E (interleukin 17E, pg/ml), quantile-quantile (QQ) plot and distribution plot before (A and B) and after normalization (D and E) were shown. We compared IL-17E in the non-severe and severe COVID-19 patients before (C,  $p = 0.4$ , Wilcoxon test) and after normalization (F,  $p = 0.44$ , T-test). We further performed association analyses between the 35 genetic variants and IL-17E using T-test and Pearson correlation. (G) Variants ACC18108AT and G29742A pass P value cut-off of 0.05 in T test. Red indicates higher mean value in cases with the variants and blue indicates higher mean value in cases without the variant. The size of symbols indicates absolute Z score number. (H) Variants ACC18108AT and C19637T have P value lower than 0.05 in Pearson correlation. Red and blue indicates positive and negative correlation, respectively. Size of the dots indicate absolute correlation coefficient. (I) After sorting Z score values of IL-17E, cases with ACC18108AT and  $\Delta$ 500-532 tend to have the highest Z score, whereas cases with C29586T and C29640T have the lowest.

### 63. IL-17F (interleukin 17F)

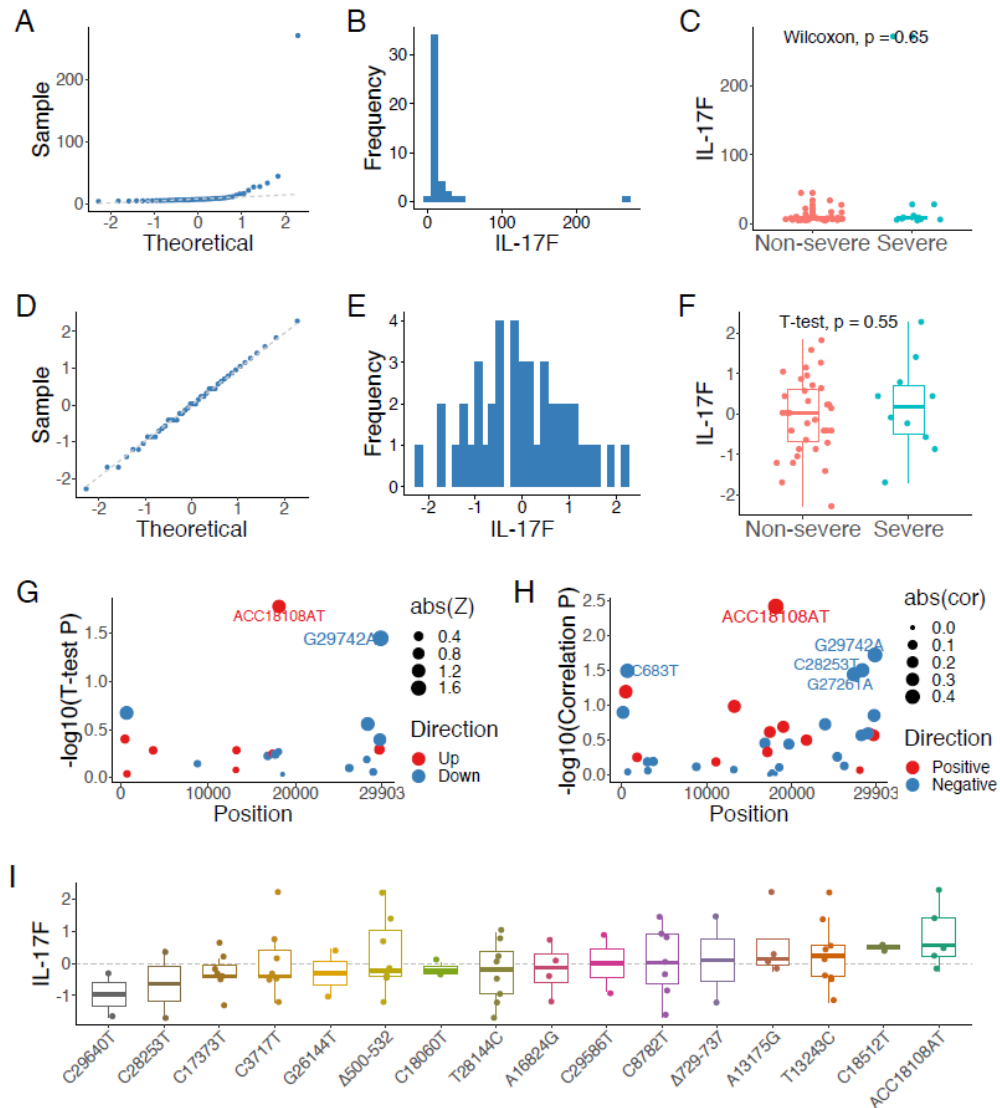

For IL-17F (interleukin 17F, pg/ml), quantile-quantile (QQ) plot and distribution plot before (A and B) and after normalization (D and E) were shown. We compared IL-17F in the non-severe and severe COVID-19 patients before (C,  $p = 0.65$ , Wilcoxon test) and after normalization (F,  $p = 0.55$ , T-test). We further performed association analyses between the 35 genetic variants and IL-17F using T-test and Pearson correlation. (G) Variants ACC18108AT and G29742A pass P value cut-off of 0.05 in T test. Red indicates higher mean value in cases with the variants and blue indicates higher mean value in cases without the variant. The size of symbols indicates absolute Z score number. (H) Variants ACC18108AT, G29742A, G28253T, G27261A and C683T have P value lower than 0.05 in Pearson correlation. Red and blue indicates positive and negative correlation, respectively. Size of the dots indicate absolute correlation coefficient. (I) After sorting Z score values of IL-17F, cases with ACC18108AT and C18512T tend to have the highest Z score, whereas cases with C29640T and C28253T have the lowest.

## 64. IL-1a (interleukin 1a)

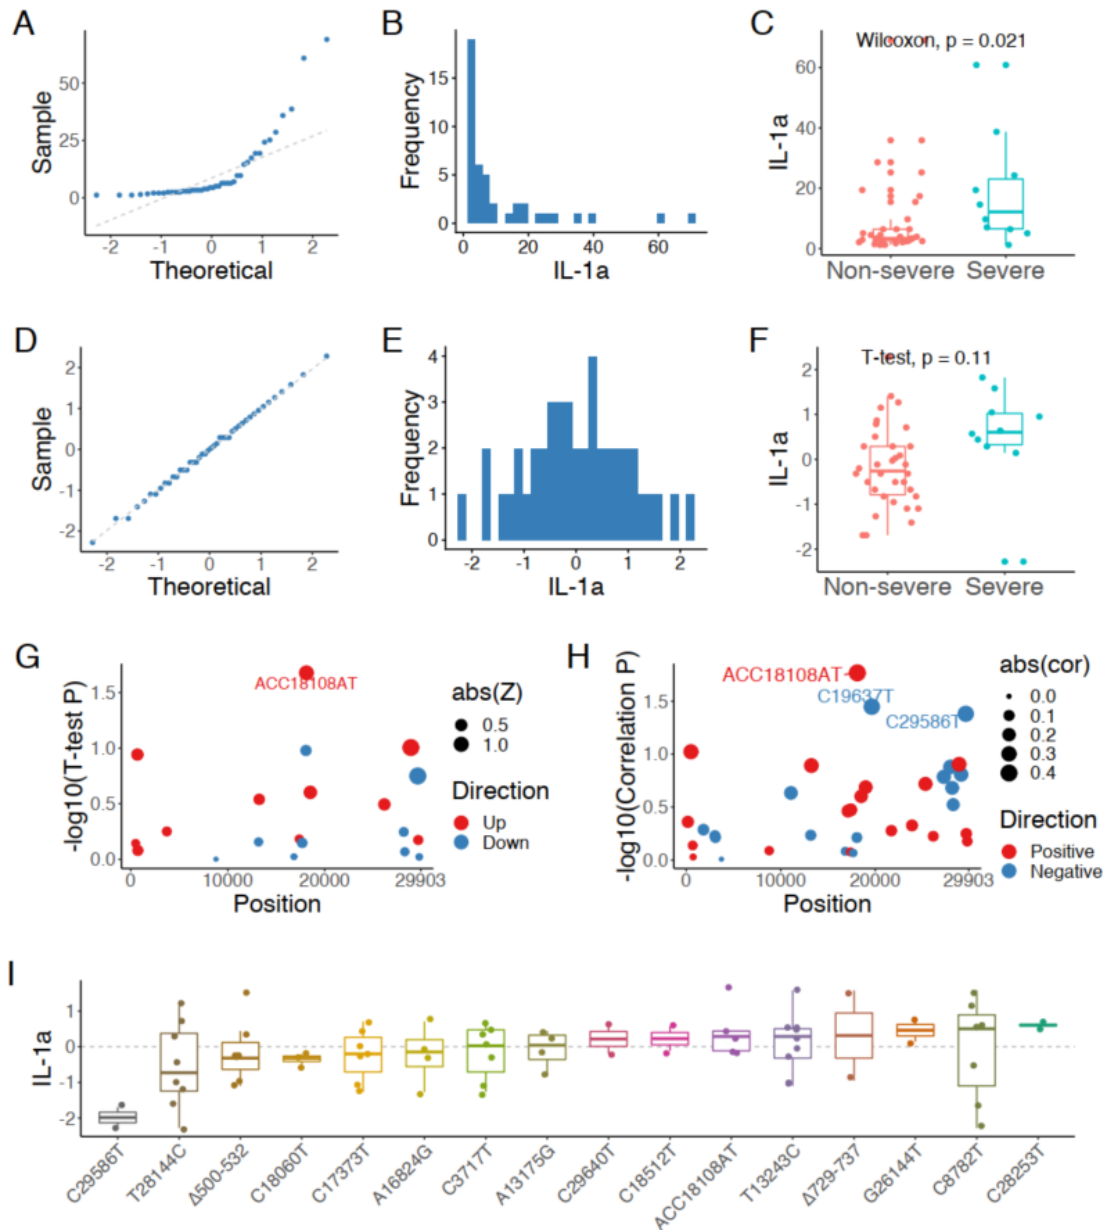

For IL-1a (interleukin 1a, pg/ml), quantile-quantile (QQ) plot and distribution plot before (A and B) and after normalization (D and E) were shown. We compared IL-1a in the non-severe and severe COVID-19 patients before (C,  $p = 2.1 \times 10^{-2}$ , Wilcoxon test) and after normalization (F,  $p = 0.11$ , T-test). We further performed association analyses between the 35 genetic variants and IL-1a using T-test and Pearson correlation. (G) Variant ACC18108AT passes P value cut-off of 0.05 in T test. Red indicates higher mean value in cases with the variants and blue indicates higher mean value in cases without the variant. The size of symbols indicates absolute Z score number. (H) Variants ACC18108AT, C19637T and C29586T have P value lower than 0.05 in Pearson correlation. Red and blue indicates positive and negative correlation, respectively. Size of the dots indicate absolute correlation coefficient. (I) After sorting Z score values of IL-1a, cases with C28253T and C8782T tend to have the highest Z score, whereas cases with C29586T and T28144C have the lowest.

## 65. IL-1b (interleukin 1b)

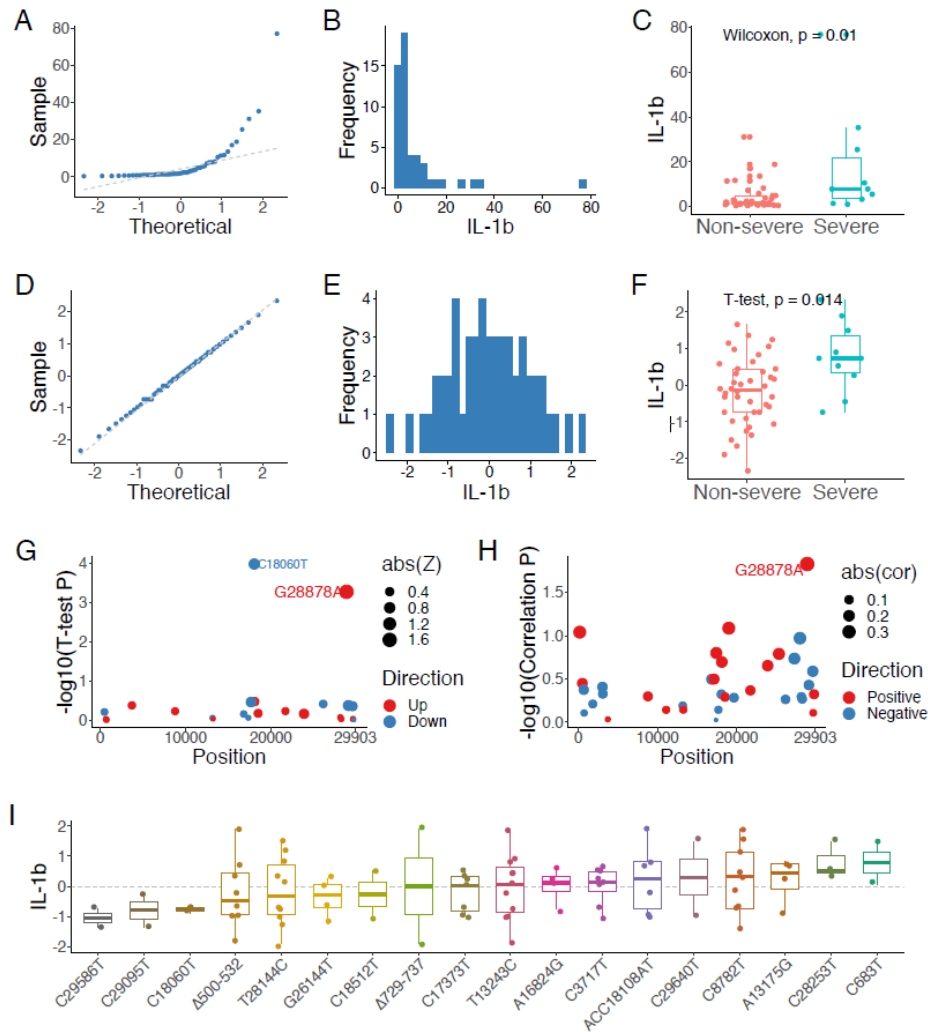

For IL-1b (interleukin 1b, pg/ml), quantile-quantile (QQ) plot and distribution plot before (A and B) and after normalization (D and E) were shown. We compared IL-1b in the non-severe and severe COVID-19 patients before (C,  $p = 0.01$ , Wilcoxon test) and after normalization (F,  $p = 1.4 \times 10^{-2}$ , T-test). We further performed association analyses between the 35 genetic variants and IL-1b using T-test and Pearson correlation. (G) Variants G28878A and C18060T pass P value cut-off of 0.05 in T test. Red indicates higher mean value in cases with the variants and blue indicates higher mean value in cases without the variant. The size of symbols indicates absolute Z score number. (H) Variant G28878A has P value lower than 0.05 in Pearson correlation. Red and blue indicates positive and negative correlation, respectively. Size of the dots indicate absolute correlation coefficient. (I) After sorting Z score values of IL-1b, cases with C683T and C28253T tend to have the highest Z score, whereas cases with C29586T and C29095T have the lowest.

## 66. IL-2 (interleukin 2)

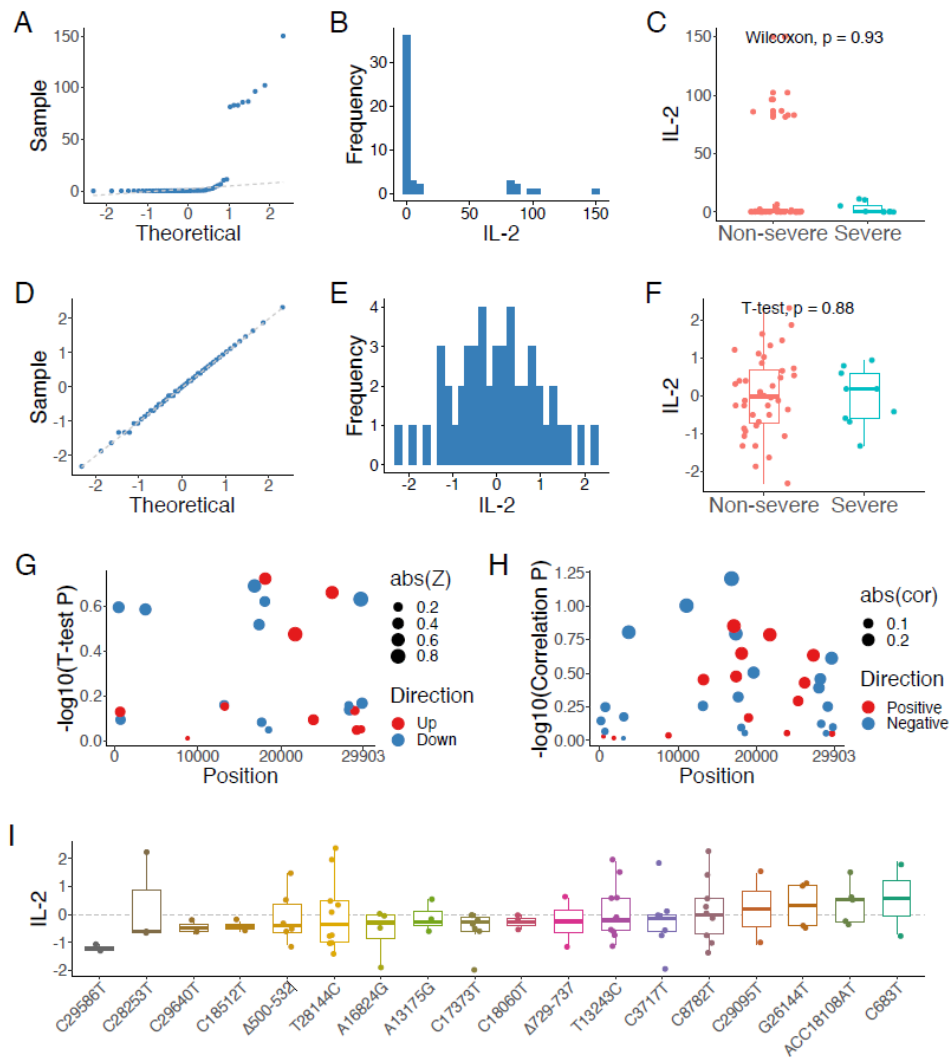

For IL-2 (interleukin 2, pg/ml), quantile-quantile (QQ) plot and distribution plot before (A and B) and after normalization (D and E) were shown. We compared IL-2 in the non-severe and severe COVID-19 patients before (C,  $p = 0.93$ , Wilcoxon test) and after normalization (F,  $p = 0.88$ , T-test). We further performed association analyses between the 35 genetic variants and IL-2 using T-test and Pearson correlation. (G) No variant in the T test (G) and Pearson correlation was with P value below 0.05 (H). After sorting Z score values of IL-2, cases with C683T and ACC18108AT tend to have the highest Z score, whereas cases with C29586T and C28253T have the lowest.

## 67. IL-21 (interleukin 21)

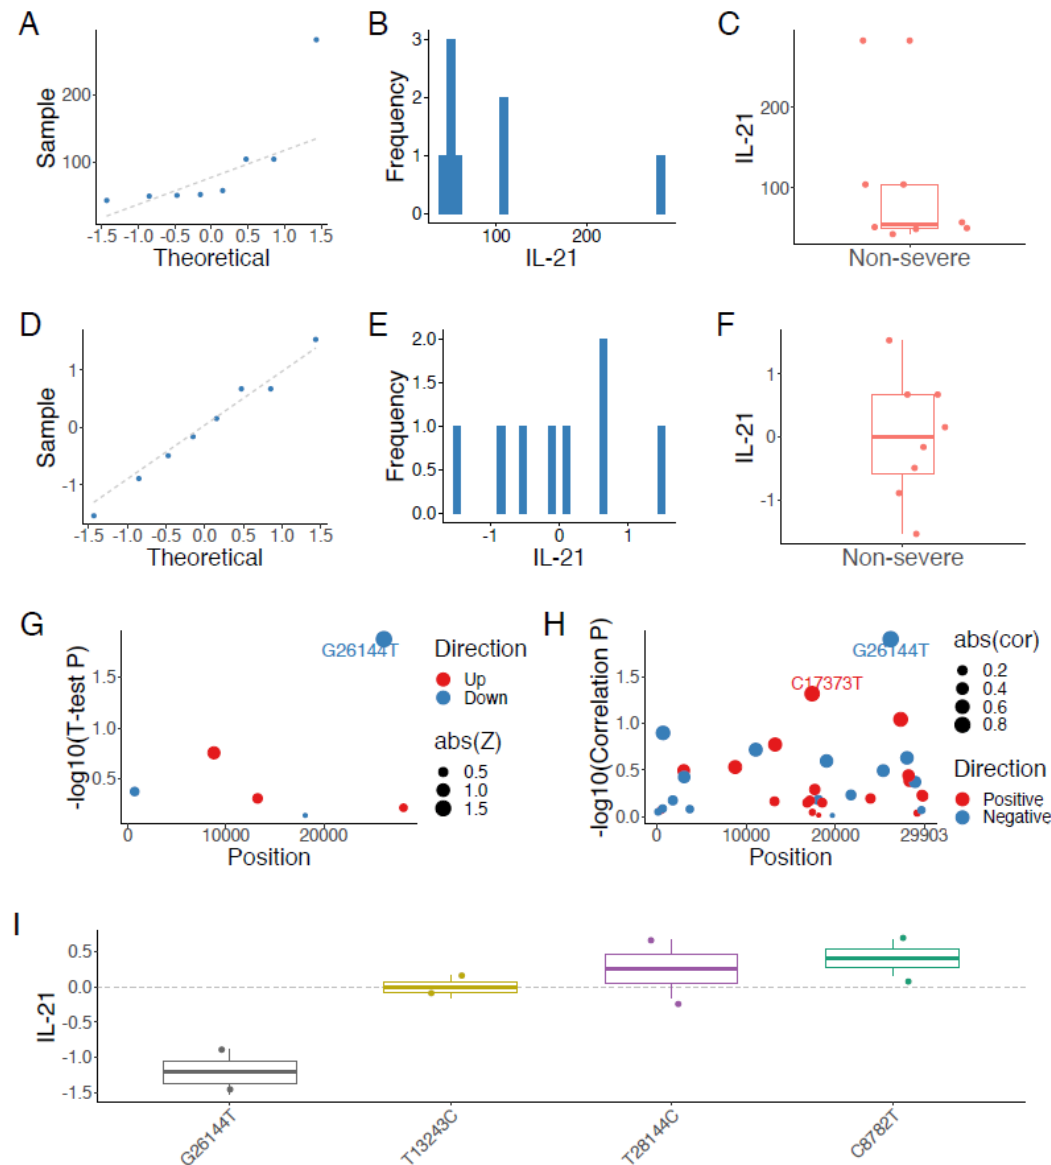

For IL-21 (interleukin 21, pg/ml), quantile-quantile (QQ) plot and distribution plot before (A and B) and after normalization (D and E) were shown. We compared IL-21 in the non-severe and severe COVID-19 patients before (C) and after normalization (F). We further performed association analyses between the 35 genetic variants and IL-21 using T-test and Pearson correlation. (G) Variant G26144T passes P value cut-off of 0.05 in T test. Red indicates higher mean value in cases with the variants and blue indicates higher mean value in cases without the variant. The size of symbols indicates absolute Z score number. (H) Variants G26144T and C17373T have P value lower than 0.05 in Pearson correlation. Red and blue indicates positive and negative correlation, respectively. Size of the dots indicate absolute correlation coefficient. (I) After sorting Z score values of IL-21, cases with C8782T and T28144C tend to have the highest Z score, whereas cases with G26144T have the lowest.

## 68. IL-22 (interleukin 22)

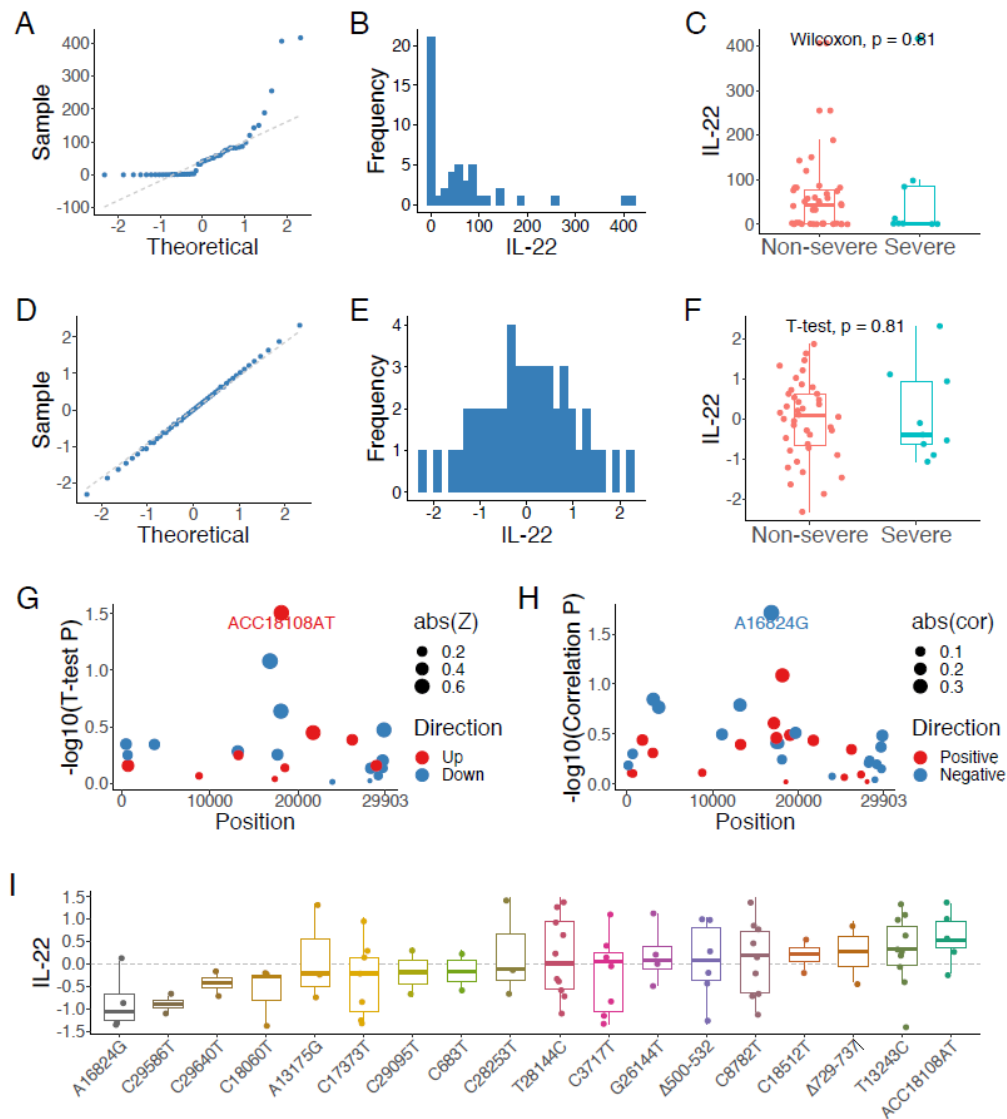

For IL-22 (interleukin 22, pg/ml), quantile-quantile (QQ) plot and distribution plot before (A and B) and after normalization (D and E) were shown. We compared IL-22 in the non-severe and severe COVID-19 patients before (C,  $p = 0.81$ , Wilcoxon test) and after normalization (F,  $p = 0.81$ , T-test). We further performed association analyses between the 35 genetic variants and IL-22 using T-test and Pearson correlation. (G) Variant ACC18108AT passes P value cut-off of 0.05 in T test. Red indicates higher mean value in cases with the variants and blue indicates higher mean value in cases without the variant. The size of symbols indicates absolute Z score number. (H) Variant A16824G has P value lower than 0.05 in Pearson correlation. Red and blue indicates positive and negative correlation, respectively. Size of the dots indicate absolute correlation coefficient. (I) After sorting Z score values of IL-22, cases with ACC18108AT and T13243C tend to have the highest Z score, whereas cases with A16824G and C18060T have the lowest.



## 69. IL-23 (interleukin 3)

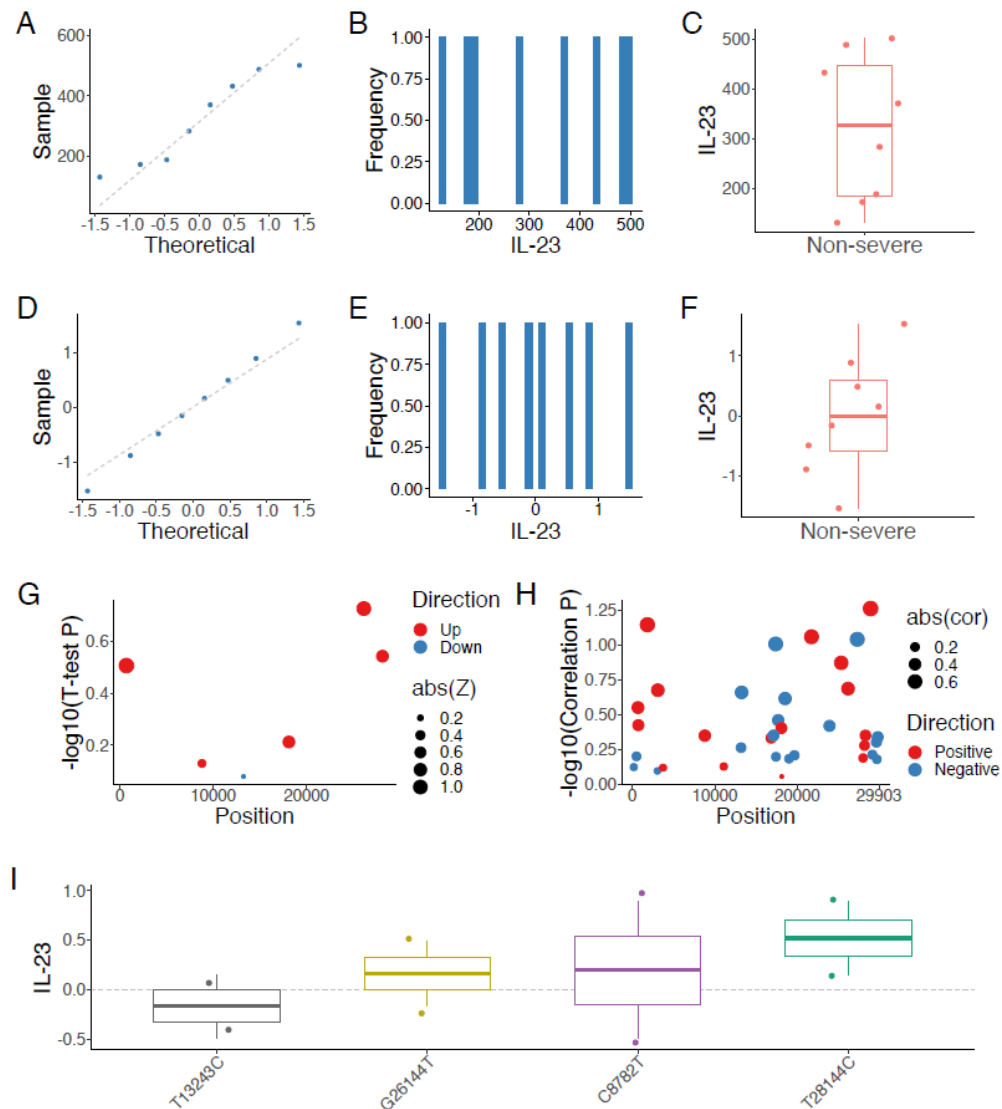

For IL-23 (interleukin 23, pg/ml), quantile-quantile (QQ) plot and distribution plot before (A and B) and after normalization (D and E) were shown. We compared IL-23 in the non-severe and severe COVID-19 patients before (C) and after normalization (F). We further performed association analyses between the 35 genetic variants and IL-23 using T-test and Pearson correlation. (G) No variant in the T test (G) and Pearson correlation was with P value below 0.05 (H). After sorting Z score values of IL-23, cases with T28144C and C8782T tend to have the highest Z score, whereas cases with T13243C and G26144T have the lowest.

## 70. IL-33 (interleukin 33)

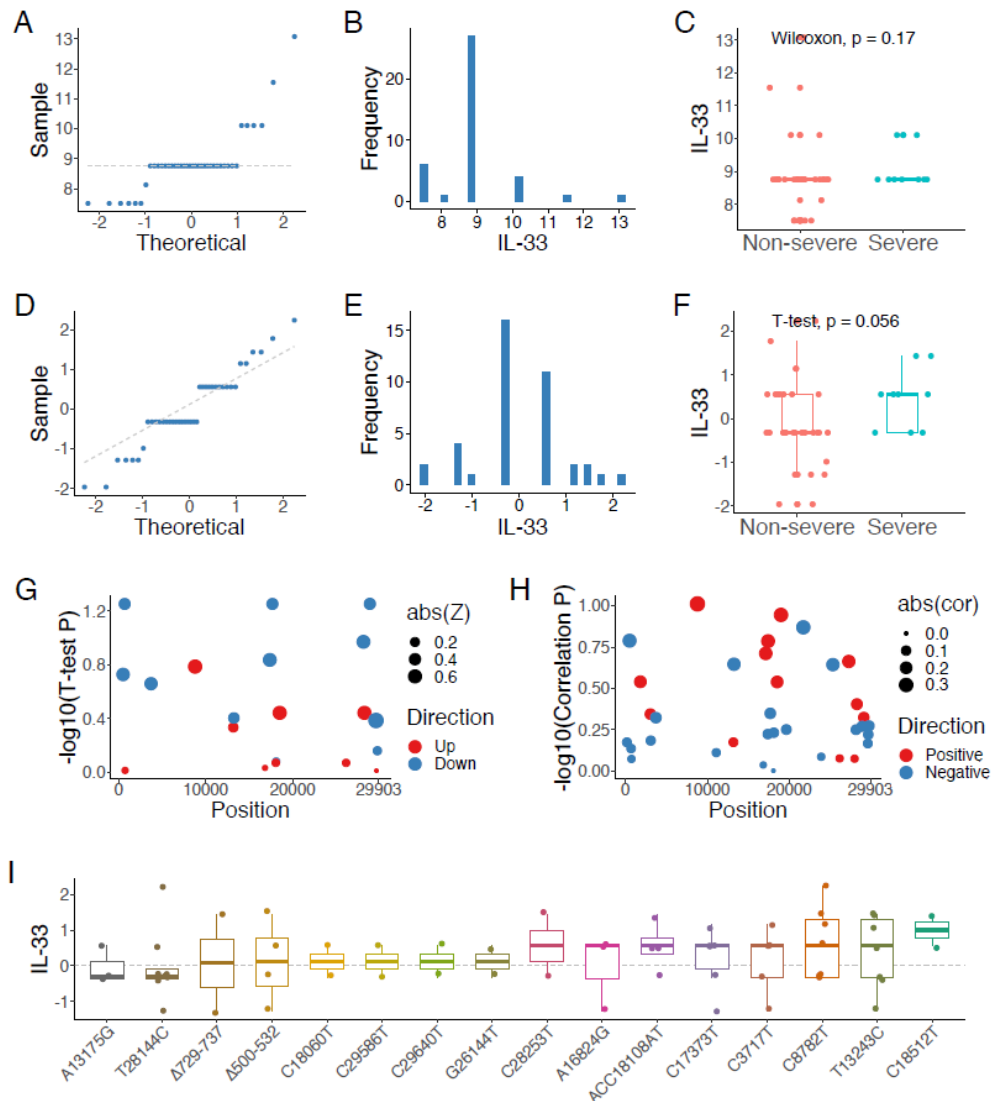

For IL-33 (interleukin 33, pg/ml), quantile-quantile (QQ) plot and distribution plot before (A and B) and after normalization (D and E) were shown. We compared IL-33 in the non-severe and severe COVID-19 patients before (C,  $p = 0.17$ , Wilcoxon test) and after normalization (F,  $p = 5.6 \times 10^{-2}$ , T-test). We further performed association analyses between the 35 genetic variants and IL-33 using T-test and Pearson correlation. (G) No variant in the T test (G) and Pearson correlation was with P value below 0.05 (H). After sorting Z score values of IL-33, cases with C18512T and T13243C tend to have the highest Z score, whereas cases with A13175G and T28144C have the lowest.

## 71. IL-4 (interleukin 4)

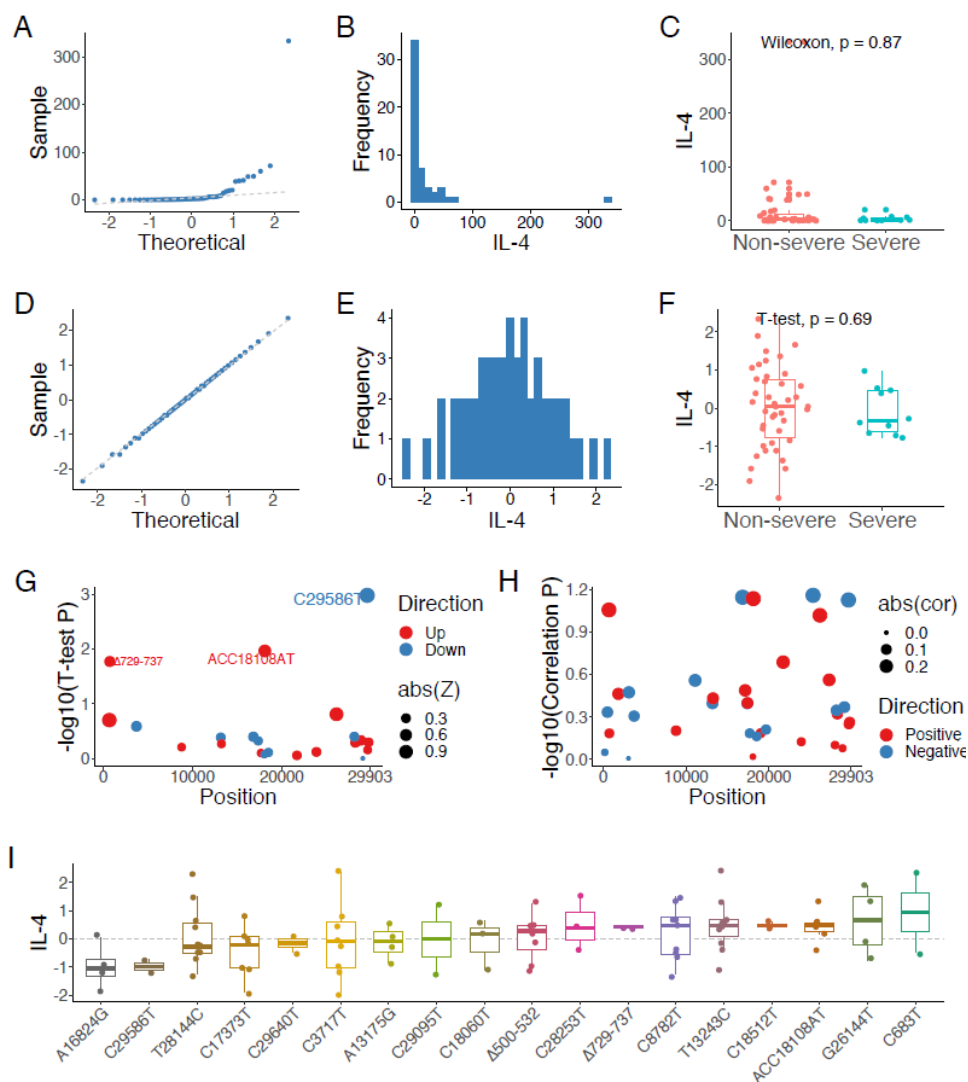

For IL-4 (interleukin 4, pg/ml), quantile-quantile (QQ) plot and distribution plot before (A and B) and after normalization (D and E) were shown. We compared IL-4 in the non-severe and severe COVID-19 patients before (C,  $p = 0.87$ , Wilcoxon test) and after normalization (F,  $p = 0.69$ , T-test). We further performed association analyses between the 35 genetic variants and IL-4 using T-test and Pearson correlation. (G) Variants C29586T, ACC18108AT and  $\Delta 729-737$  pass P value cut-off of 0.05 in T test. Red indicates higher mean value in cases with the variants and blue indicates higher mean value in cases without the variant. The size of symbols indicates absolute Z score number. (H) No variant has P value lower than 0.05 in Pearson correlation. Red and blue indicates positive and negative correlation, respectively. Size of the dots indicate absolute correlation coefficient. (I) After sorting Z score values of IL-4, cases with C683T and G26144T tend to have the highest Z score, whereas cases with A16824G and C29586T have the lowest.

## 72. IL-6 (interleukin 6)

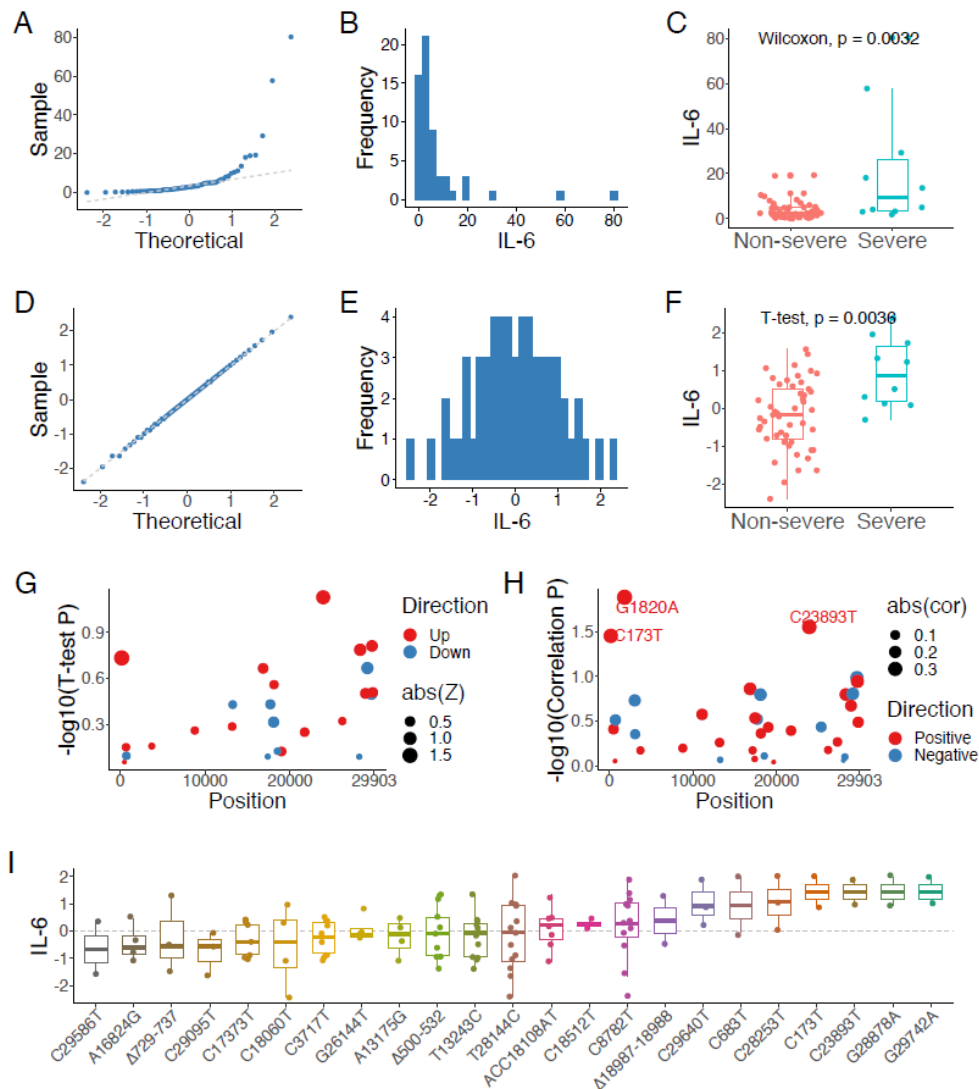

For IL-6 (interleukin 6, pg/ml), quantile-quantile (QQ) plot and distribution plot before (A and B) and after normalization (D and E) were shown. We compared IL-6 in the non-severe and severe COVID-19 patients before (C,  $p = 3.2 \times 10^{-3}$ , Wilcoxon test) and after normalization (F,  $p = 3.6 \times 10^{-3}$ , T-test). We further performed association analyses between the 35 genetic variants and IL-6 using T-test and Pearson correlation. (G) No variant passes P value cut-off of 0.05 in T test. Red indicates higher mean value in cases with the variants and blue indicates higher mean value in cases without the variant. The size of symbols indicates absolute Z score number. (H) Variants G1820A, C23893T and C173T have P value lower than 0.05 in Pearson correlation. Red and blue indicates positive and negative correlation, respectively. Size of the dots indicate absolute correlation coefficient. (I) After sorting Z score values of IL-6, cases with G29742A and G28878A tend to have the highest Z score, whereas cases with C29586T and A16824G have the lowest.

### 73. IL-8 (interleukin 8)

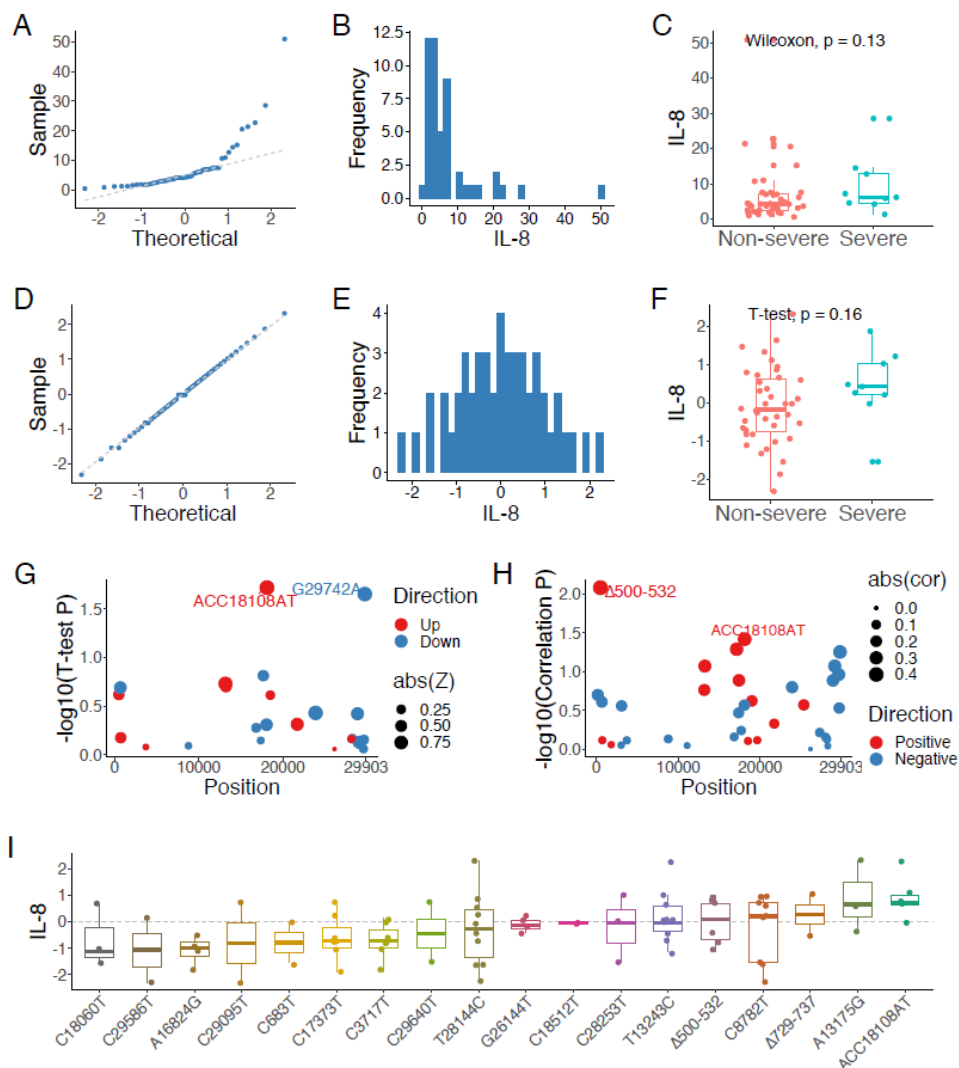

For IL-8 (interleukin 8, pg/ml), quantile-quantile (QQ) plot and distribution plot before (A and B) and after normalization (D and E) were shown. We compared IL-8 in the non-severe and severe COVID-19 patients before (C,  $p = 0.13$ , Wilcoxon test) and after normalization (F,  $p = 0.16$ , T-test). We further performed association analyses between the 35 genetic variants and IL-8 using T-test and Pearson correlation. (G) Variants ACC18108AT and G29742A pass P value cut-off of 0.05 in T test. Red indicates higher mean value in cases with the variants and blue indicates higher mean value in cases without the variant. The size of symbols indicates absolute Z score number. (H) Variants  $\Delta 500-532$  and ACC18108AT have P value lower than 0.05 in Pearson correlation. Red and blue indicates positive and negative correlation, respectively. Size of the dots indicate absolute correlation coefficient. (I) After sorting Z score values of IL-8, cases with ACC18108AT and A13175G tend to have the highest Z score, whereas cases with C18060T and C29586T have the lowest.

## 74. INR (prothrombin time international normalized ratio)

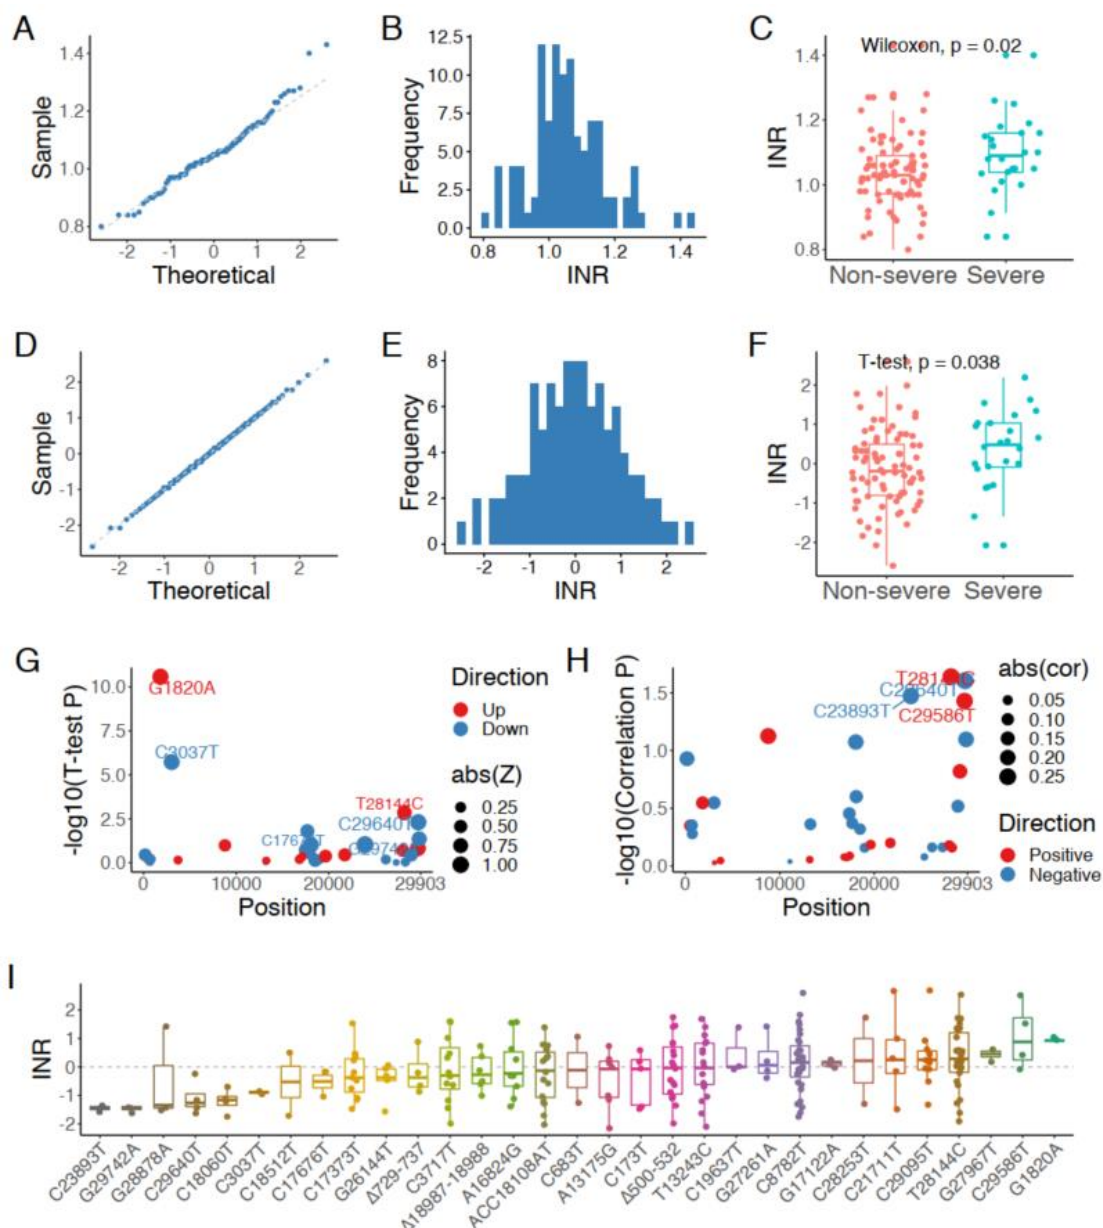

For INR (prothrombin time international normalized ratio), quantile-quantile (QQ) plot and distribution plot before (**A** and **B**) and after normalization (**D** and **E**) were shown. We compared INR in the non-severe and severe COVID-19 patients before (**C**,  $p = 0.02$ , Wilcoxon test) and after normalization (**F**,  $p = 3.8 \times 10^{-2}$ , T-test). (**G**) Variants C3037T, G1820A, C29640T, T28144C and G29743A pass P value cut-off of 0.05 in T test. Red indicates higher mean value in cases with the variants and blue indicates higher mean value in cases without the variant. The size of symbols indicates absolute Z score number. (**H**) Variants C23893T and C29586T have P value lower than 0.05 in Pearson correlation. Red and blue indicates positive and negative correlation, respectively. Size of the dots indicate absolute correlation coefficient. (**I**) After sorting Z score values of INR, cases with C29586T and G27967T tend to have the highest Z score, whereas cases with C23893T and G29742A have the lowest.

## 75. K<sup>+</sup> (serum potassium)

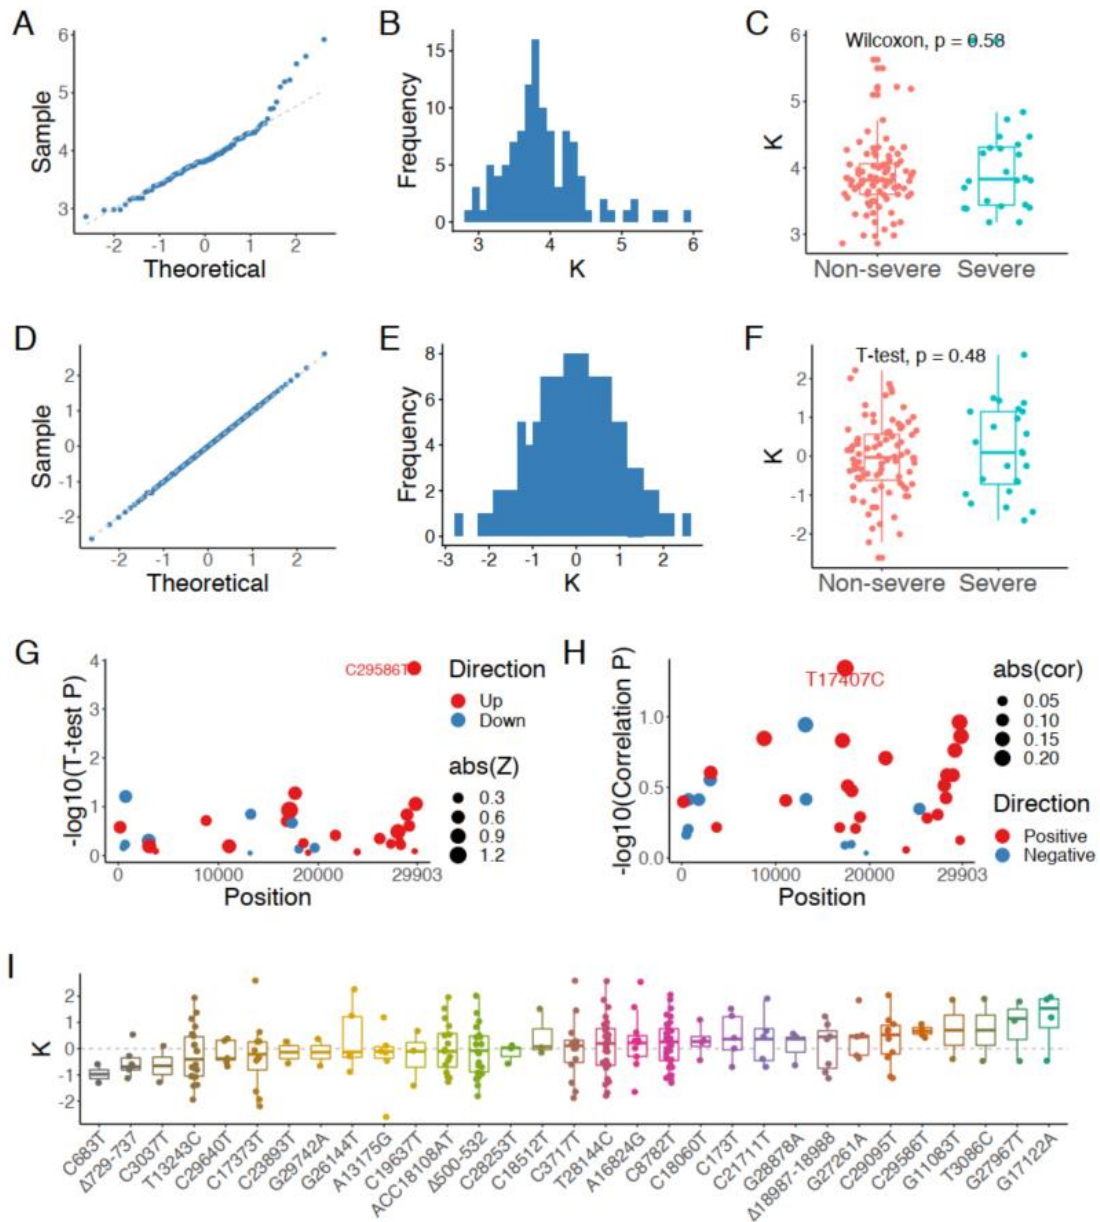

For K<sup>+</sup> (serum potassium, mmol/L), quantile-quantile (QQ) plot and distribution plot before (A and B) and after normalization (D and E) were shown. We compared K in the non-severe and severe COVID-19 patients before (C,  $p = 0.53$ , Wilcoxon test) and after normalization (F,  $p = 0.48$ , T-test). We further performed association analyses between the 35 genetic variants and K using T-test and Pearson correlation. (G) Variant C29586T passes P value cut-off of 0.05 in T test. Red indicates higher mean value in cases with the variants and blue indicates higher mean value in cases without the variant. The size of symbols indicates absolute Z score number. (H) Variant T17407C has P value lower than 0.05 in Pearson correlation. Red and blue indicates positive and negative correlation, respectively. Size of the dots indicate absolute correlation coefficient. (I) After sorting Z score values of K, cases with G17122A and G2796TT tend to have the highest Z score, whereas cases with C683T and Δ729-737 have the lowest.

## 76. LA (lactic acid)

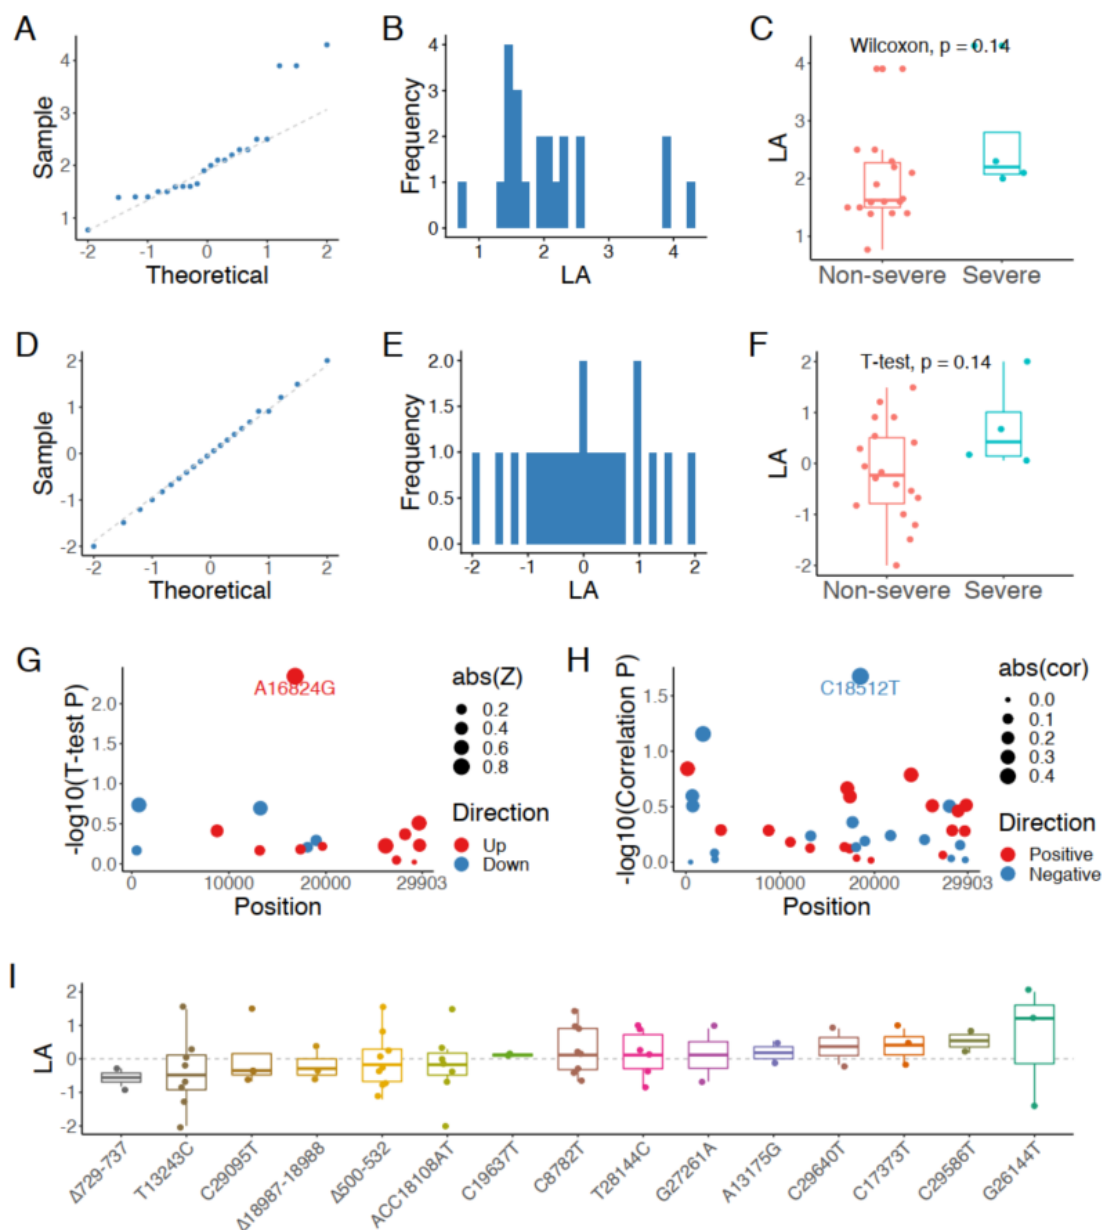

For LA (lactic acid, mmol/L), quantile-quantile (QQ) plot and distribution plot before (A and B) and after normalization (D and E) were shown. We compared LA in the non-severe and severe COVID-19 patients before (C,  $p = 0.14$ , Wilcoxon test) and after normalization (F,  $p = 0.14$ , T-test). We further performed association analyses between the 35 genetic variants and LA using T-test and Pearson correlation. (G) Variant A16824G passes P value cut-off of 0.05 in T test. Red indicates higher mean value in cases with the variants and blue indicates higher mean value in cases without the variant. The size of symbols indicates absolute Z score number. (H) Variant C18512T has P value lower than 0.05 in Pearson correlation. Red and blue indicates positive and negative correlation, respectively. Size of the dots indicate absolute correlation coefficient. (I) After sorting Z score values of LA, cases with G26144T and C29586T tend to have the highest Z score, whereas cases with  $\Delta 729-737$  and T13243C have the lowest.



## 77. LDH (lactate dehydrogenase)

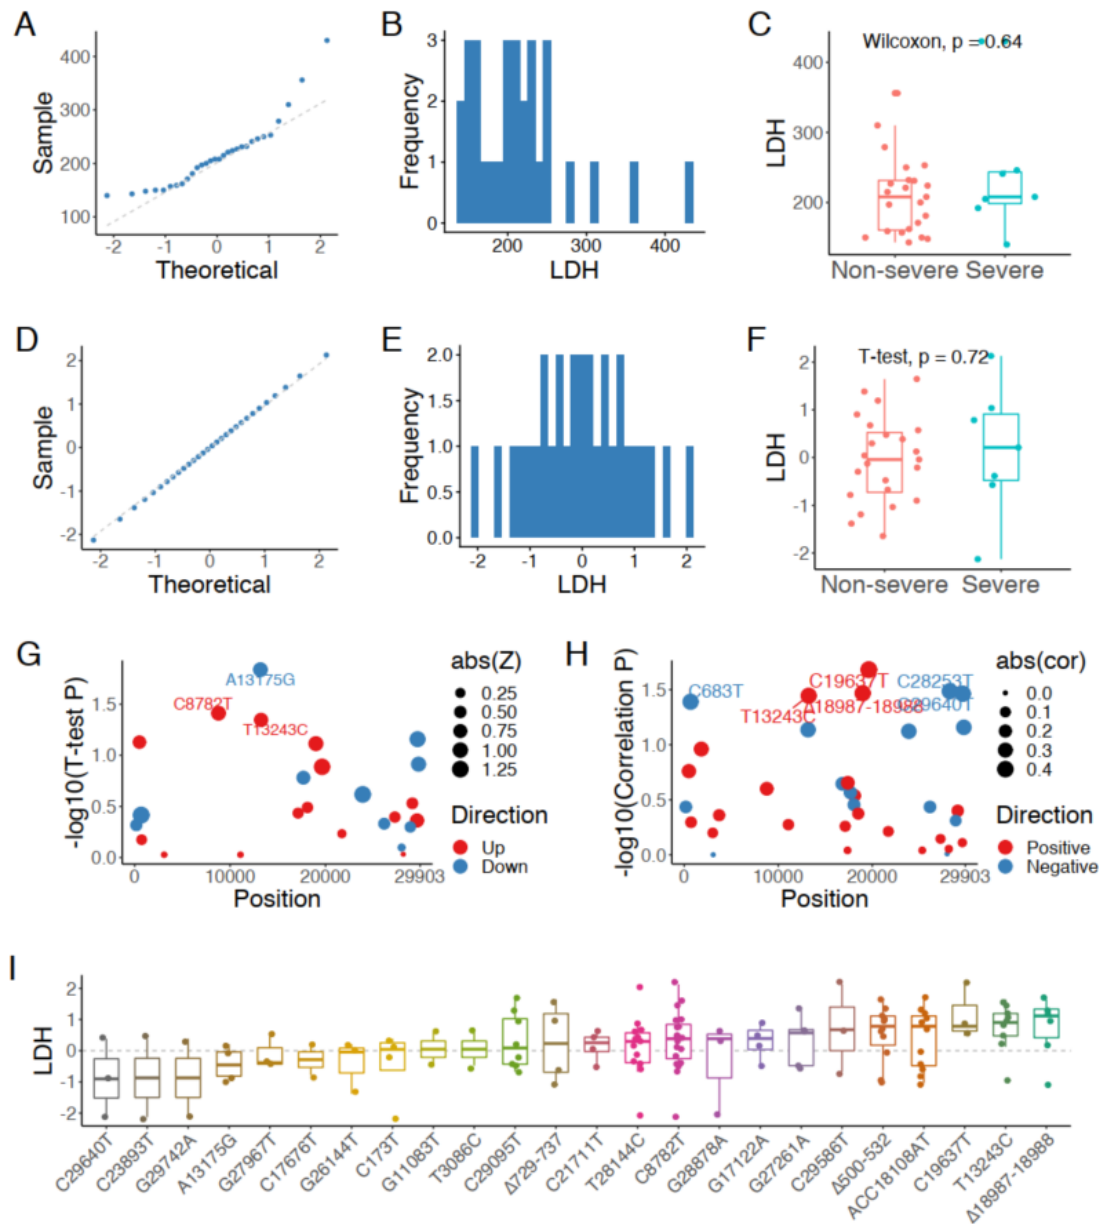

For LDH (lactate dehydrogenase, U/L), quantile-quantile (QQ) plot and distribution plot before (A and B) and after normalization (D and E) were shown. We compared LDH in the non-severe and severe COVID-19 patients before (C,  $p = 0.64$ , Wilcoxon test) and after normalization (F,  $p = 0.72$ , T-test). We further performed association analyses between the 35 genetic variants and LDH using T-test and Pearson correlation. (G) Variants C8782T, T13243C and A13175G pass P value cut-off of 0.05 in T test. Red indicates higher mean value in cases with the variants and blue indicates higher mean value in cases without the variant. The size of symbols indicates absolute Z score number. (H) Variants C683T, T13243C,  $\Delta 18987-18988$ , C19637T, C29640T and C28253T have P value lower than 0.05 in Pearson correlation. Red and blue indicates positive and negative correlation, respectively. Size of the dots indicate absolute correlation coefficient. (I) After sorting Z score values of LDH, cases with  $\Delta 18987-18988$  and T13243C tend to have the highest Z score, whereas cases with C29640T and C23893T have the lowest.

## 78. LDL-C (low-density lipoprotein cholesterol)

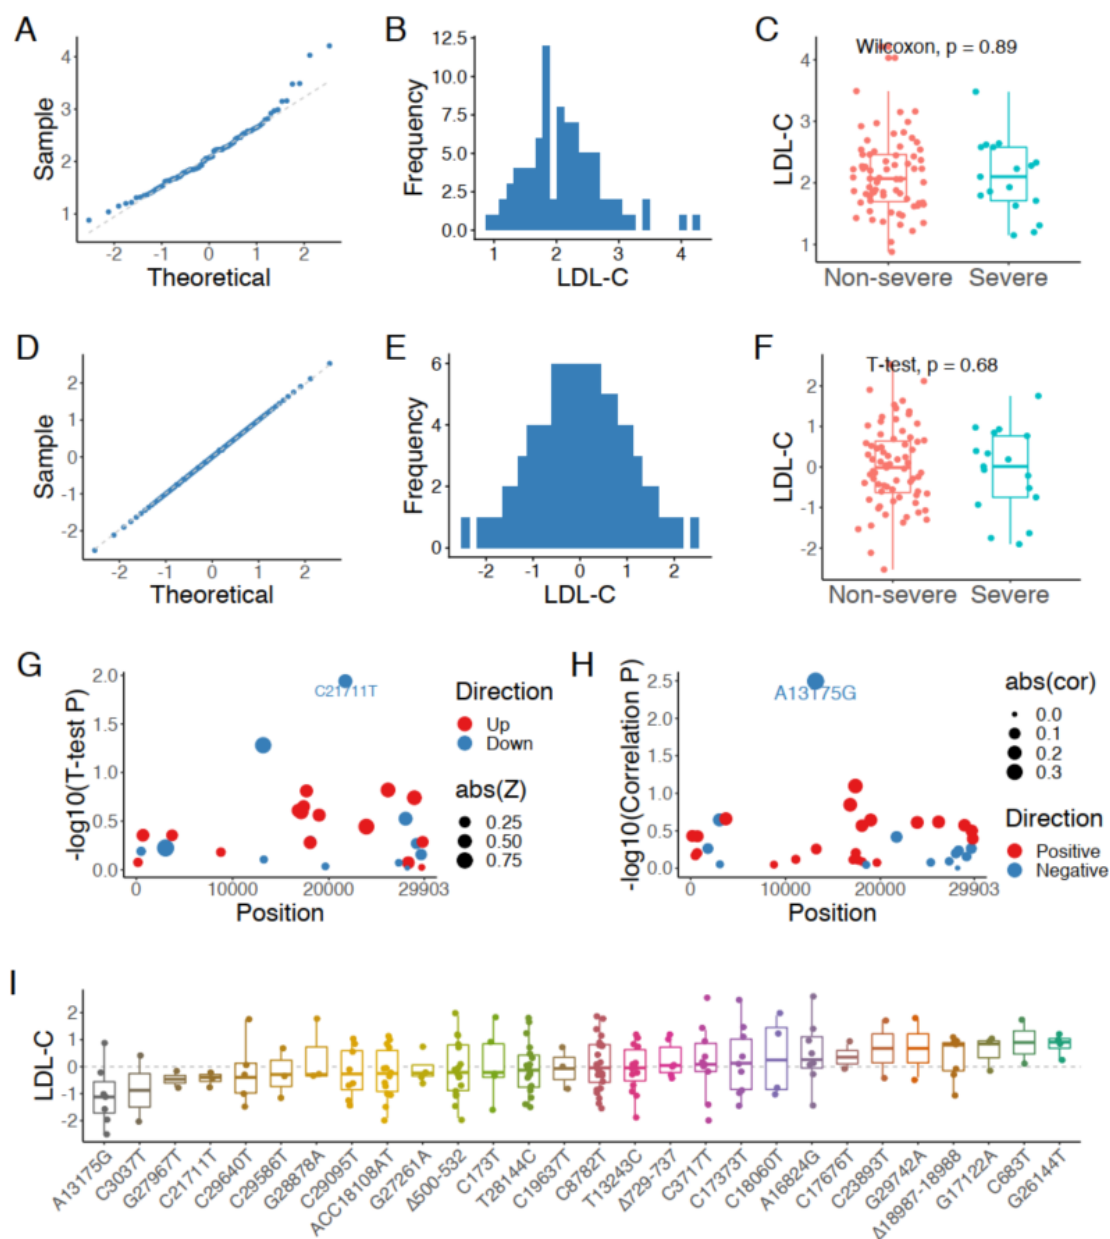

For LDL-C (low-density lipoprotein cholesterol, mmol/L), quantile-quantile (QQ) plot and distribution plot before (A and B) and after normalization (D and E) were shown. We compared LDL-C in the non-severe and severe COVID-19 patients before (C,  $p = 0.89$ , Wilcoxon test) and after normalization (F,  $p = 0.68$ , T-test). (G) Variant C21711T passes P value cut-off of 0.05 in T test. Red indicates higher mean value in cases with the variants and blue indicates higher mean value in cases without the variant. The size of symbols indicates absolute Z score number. (H) Variant A13175G has P value lower than 0.05 in Pearson correlation. Red and blue indicates positive and negative correlation, respectively. Size of the dots indicate absolute correlation coefficient. (I) After sorting Z score values of LDL-C, cases with G26144T and C683T tend to have the highest Z score, whereas cases with A13175G and C3037T have the lowest.

## 79. LYMPH % (lymphocyte percentage)

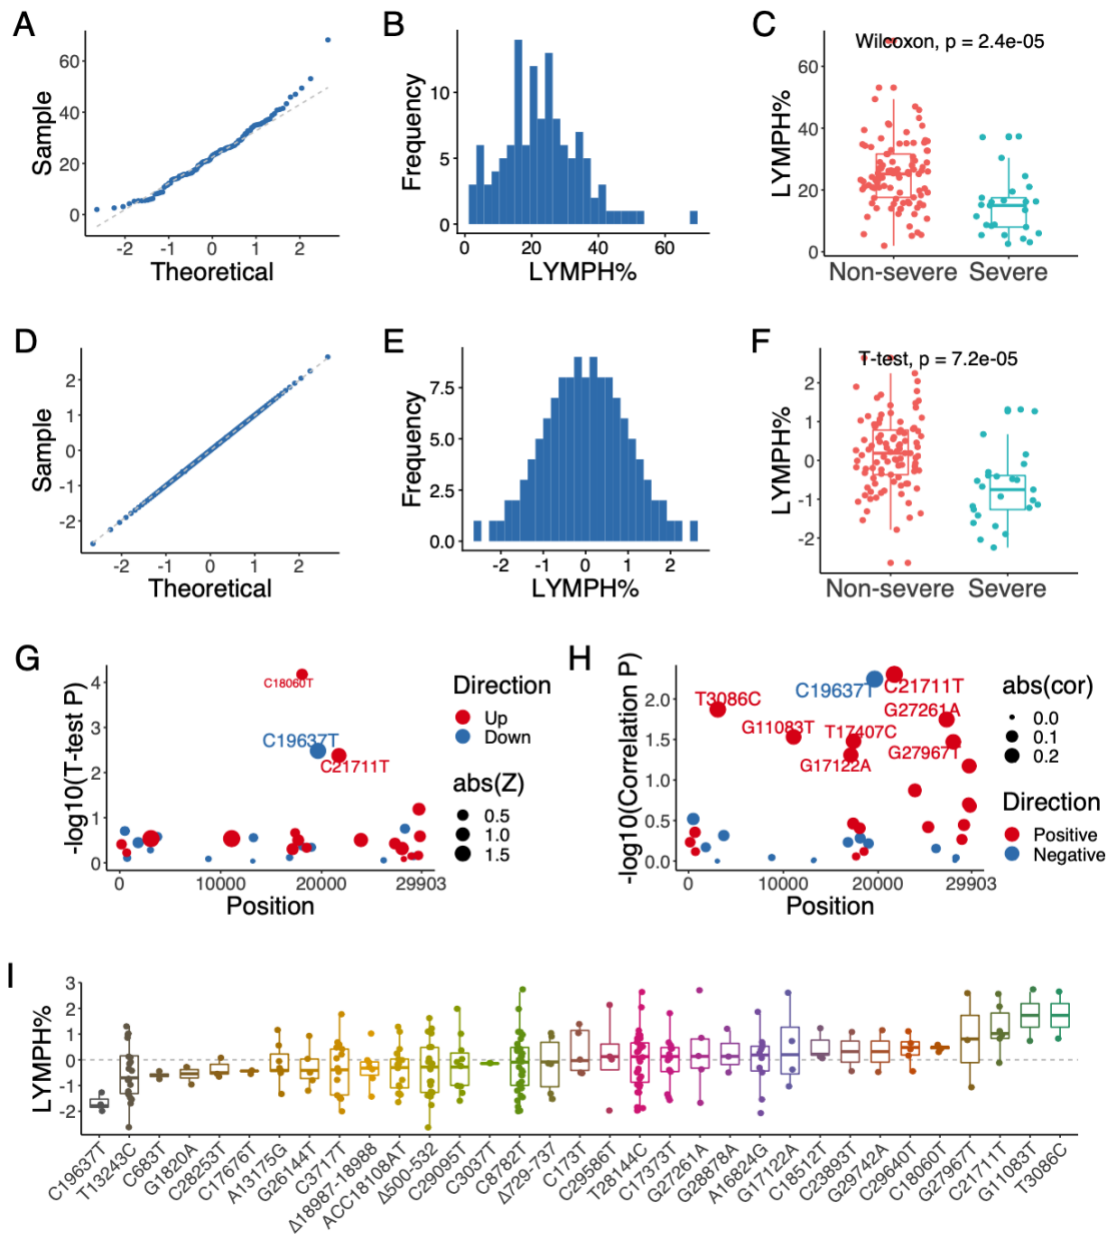

For LYMPH % (lymphocyte percentage), quantile-quantile (QQ) plot and distribution plot before (A and B) and after normalization (D and E) were shown. We compared LYMPH % in the non-severe and severe COVID-19 patients before (C,  $p = 2.4 \times 10^{-5}$ , Wilcoxon test) and after normalization (F,  $p = 7.2 \times 10^{-5}$ , T-test). (G) Variants C19637T, C21711T and C18060T pass P value cut-off of 0.05 in T test. Red indicates higher mean value in cases with the variants and blue indicates higher mean value in cases without the variant. The size of symbols indicates absolute Z score number. (H) Variants T3086C, G11083T, C19637T, T17407C, G17122A, C21711T, G27261A and G27967T have P value lower than 0.05 in Pearson correlation. Red and blue indicates positive and negative correlation, respectively. Size of the dots indicate absolute correlation coefficient. (I) After sorting Z score values of LYMPH %, cases with T3086C and G11083T tend to have the highest Z score, whereas cases with C19637T and T13243C have the lowest.

## 80. Lymphocyte (lymphocyte count)

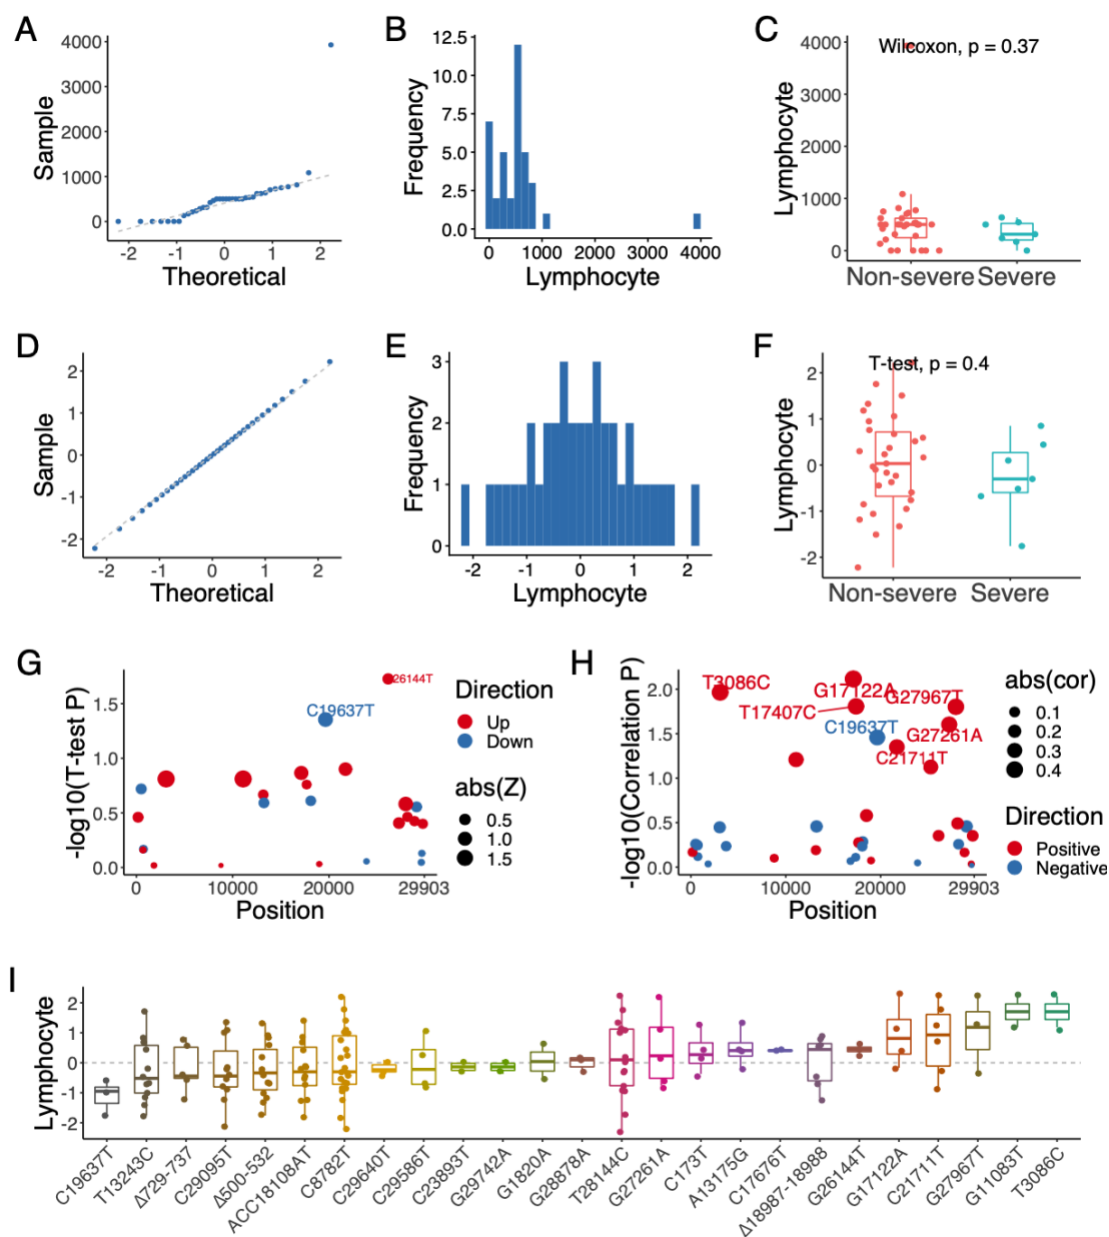

For lymphocyte (lymphocyte count,  $\times 10^9/L$ ), quantile-quantile (QQ) plot and distribution plot before (A and B) and after normalization (D and E) were shown. We compared lymphocyte in the non-severe and severe COVID-19 patients before (C,  $p = 0.37$ , Wilcoxon test) and after normalization (F,  $p = 0.40$ , T-test). (G) Variants C19637T and G26144T pass P value cut-off of 0.05 in T test. Red indicates higher mean value in cases with the variants and blue indicates higher mean value in cases without the variant. The size of symbols indicates absolute Z score number. (H) Variants T3086C, G17122A, C19637T, T17407C, C21711T, G27967T and G27261A have P value lower than 0.05 in Pearson correlation. Red and blue indicates positive and negative correlation, respectively. Size of the dots indicate absolute correlation coefficient. (I) After sorting Z score values of lymphocyte, cases with T3086C and G11083T tend to have the highest Z score, whereas cases with C19637T and T13243C have the lowest.

## 81. MAP (mean arterial pressure)

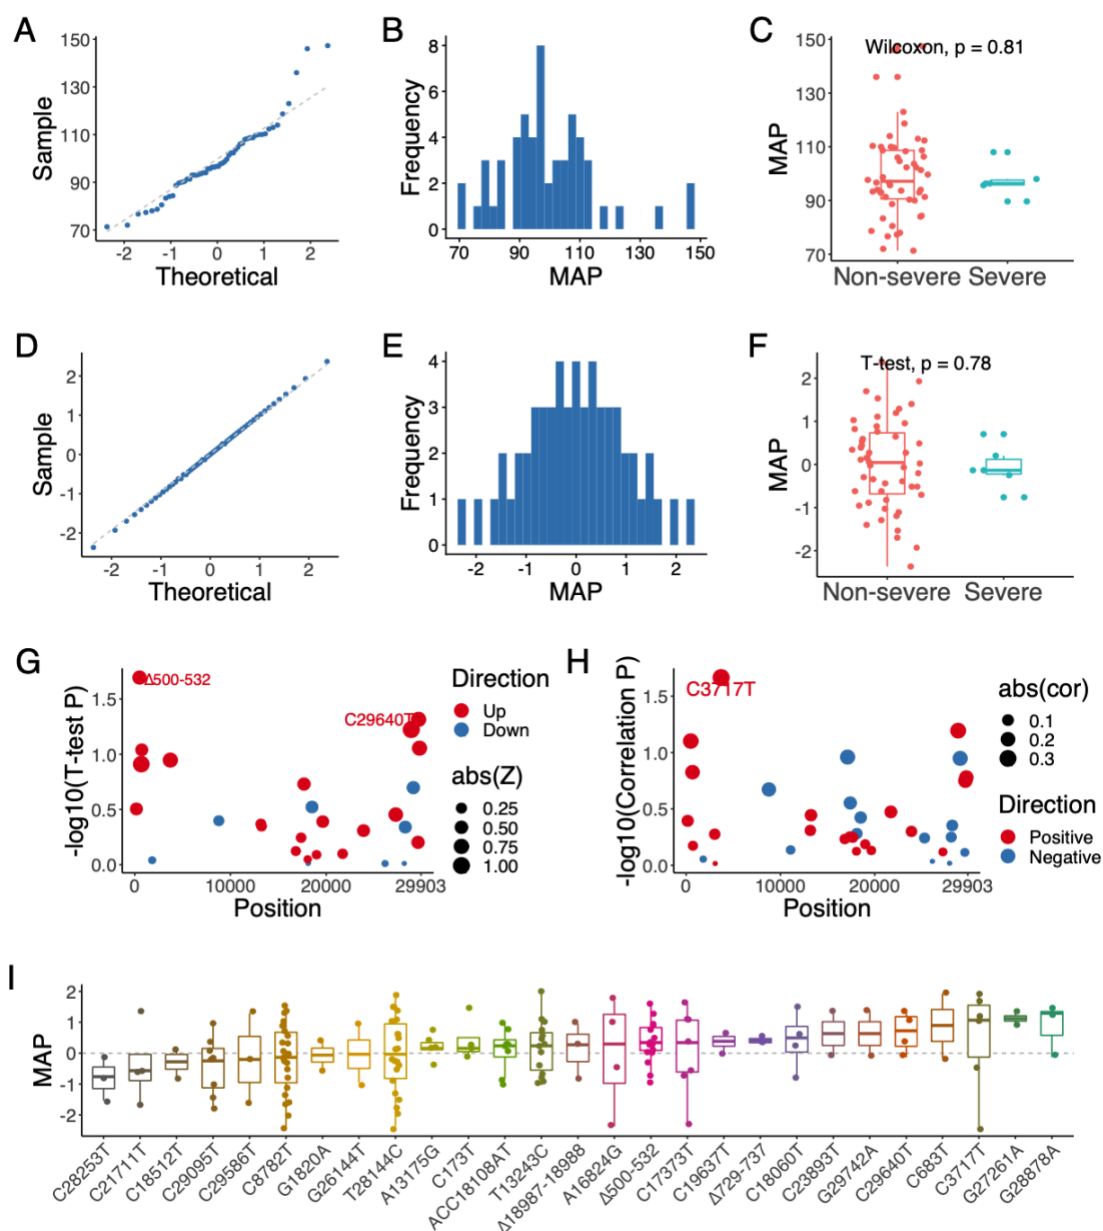

For MAP (mean arterial pressure, mmHg), quantile-quantile (QQ) plot and distribution plot before (**A** and **B**) and after normalization (**D** and **E**) were shown. We compared MAP in the non-severe and severe COVID-19 patients before (**C**,  $p = 0.81$ , Wilcoxon test) and after normalization (**F**,  $p = 0.78$ , T-test). We further performed association analyses between the 35 genetic variants and MAP using T-test and Pearson correlation. (**G**) Variants  $\Delta 500-532$  and  $C29640T$  pass P value cut-off of 0.05 in T test. Red indicates higher mean value in cases with the variants and blue indicates higher mean value in cases without the variant. The size of symbols indicates absolute Z score number. (**H**) Variant  $C3717T$  has P value lower than 0.05 in Pearson correlation. Red and blue indicates positive and negative correlation, respectively. Size of the dots indicate absolute correlation coefficient. (**I**) After sorting Z score values of MAP, cases with  $G28878A$  and  $G27261A$  tend to have the highest Z score, whereas cases with  $C28253T$  and  $C21711T$  have the lowest.

## 82. MCH (mean corpuscular hemoglobin)

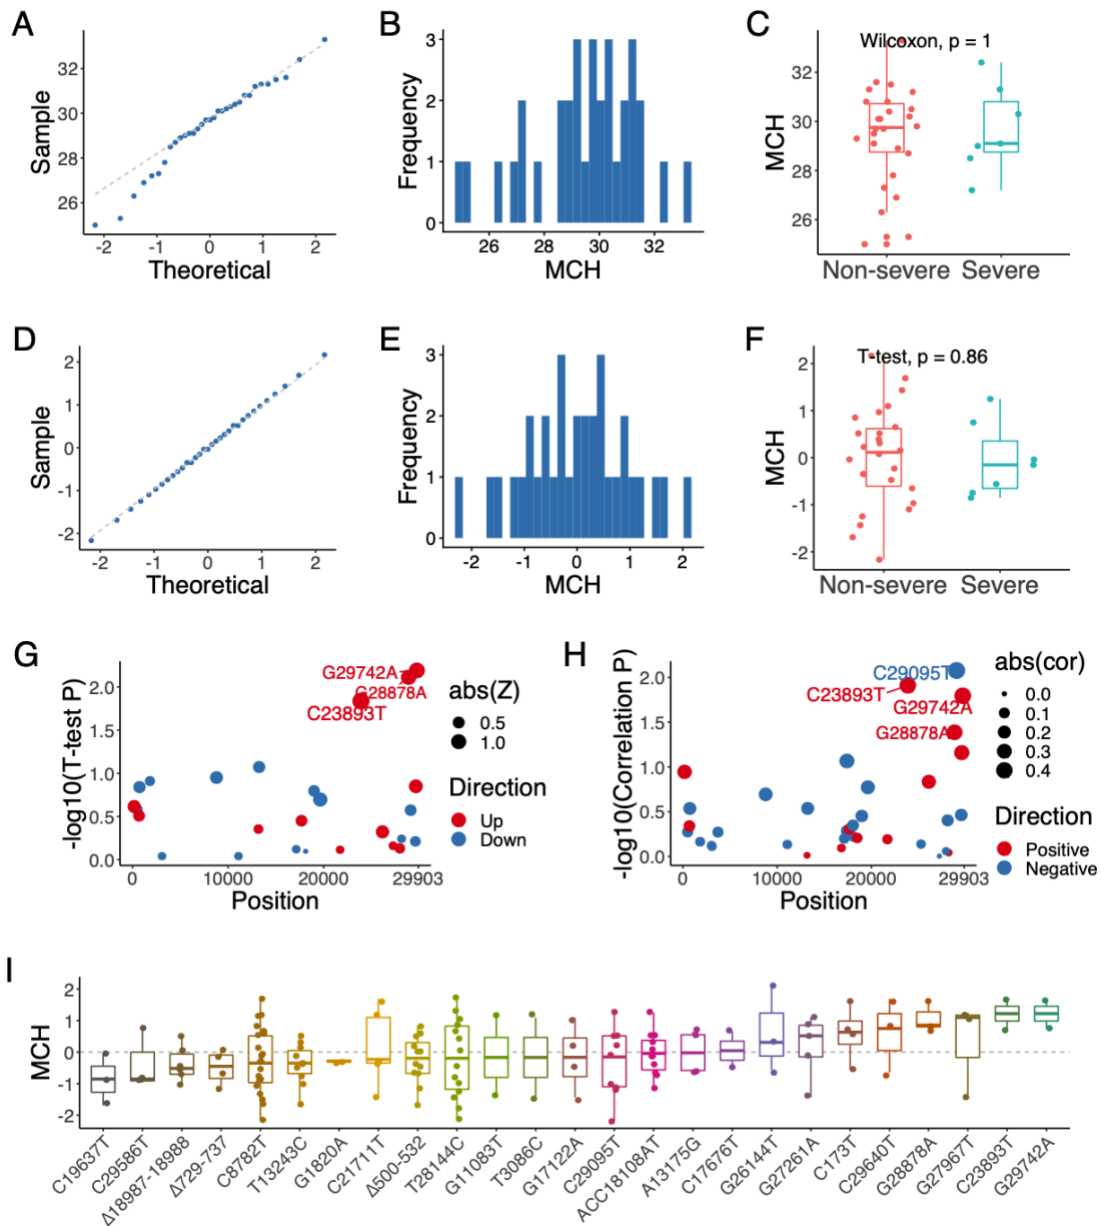

For MCH (mean corpuscular hemoglobin, pg/cell), quantile-quantile (QQ) plot and distribution plot before (**A** and **B**) and after normalization (**D** and **E**) were shown. We compared MCH in the non-severe and severe COVID-19 patients before (**C**,  $p = 1.00$ , Wilcoxon test) and after normalization (**F**,  $p = 0.86$ , T-test). (**G**) Variants G29742A, C23893T and G28878A pass P value cut-off of 0.05 in T test. Red indicates higher mean value in cases with the variants and blue indicates higher mean value in cases without the variant. The size of symbols indicates absolute Z score number. (**H**) Variants C23893T, C29095T, G29742A and G28878A have P value lower than 0.05 in Pearson correlation. Red and blue indicates positive and negative correlation, respectively. Size of the dots indicate absolute correlation coefficient. (**I**) After sorting Z score values of MCH, cases with G29742A and C23893T tend to have the highest Z score, whereas cases with C19637T and C29586T have the lowest.

### 83. MCV (mean corpuscular volume)

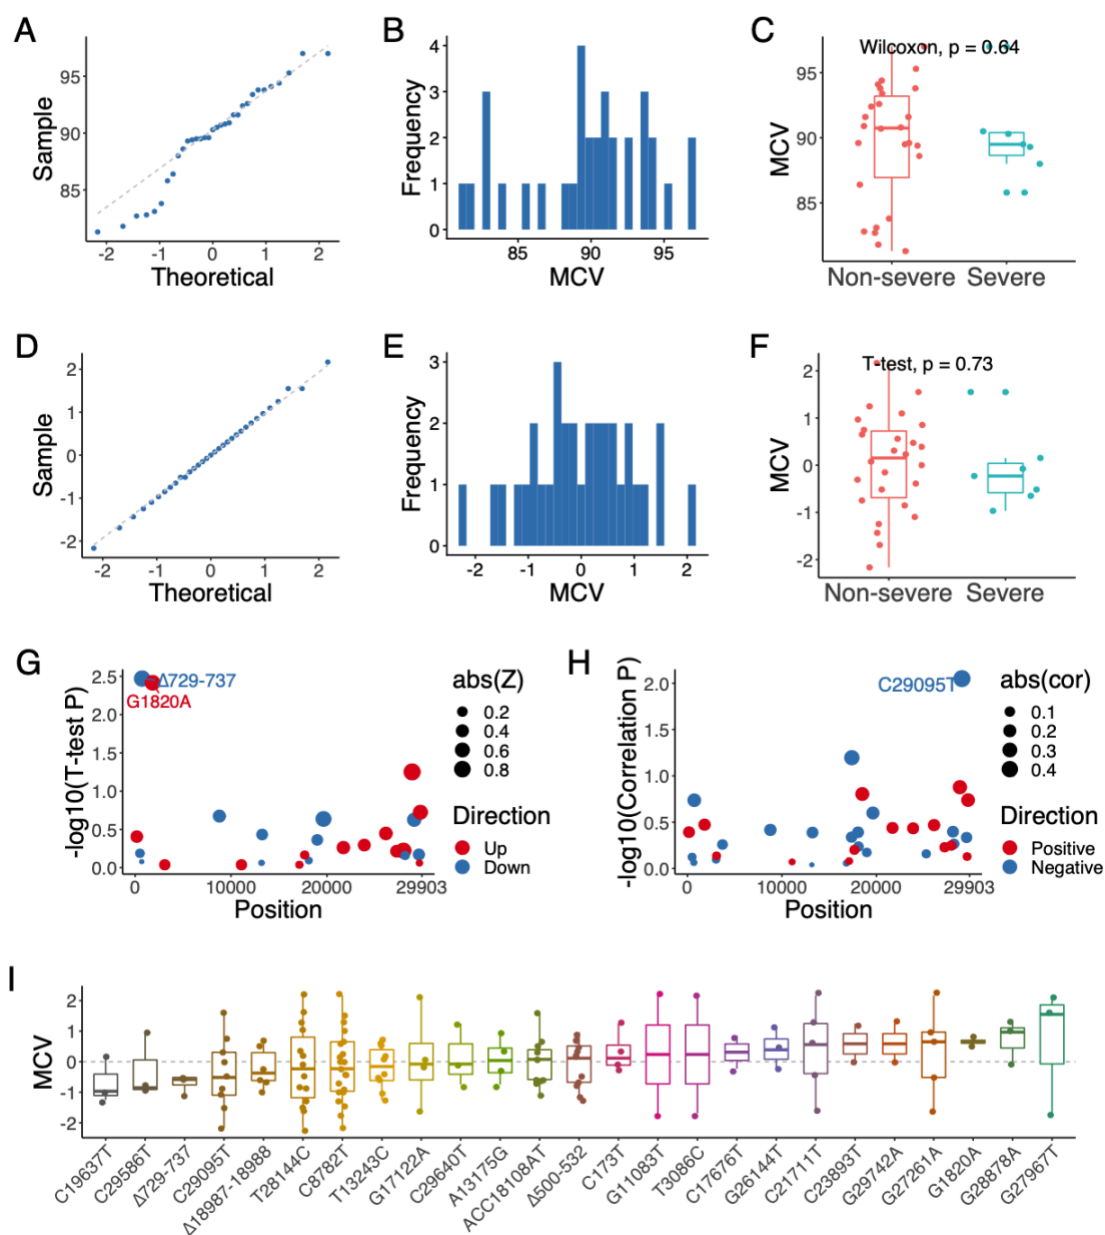

For MCV (mean corpuscular volume, fl), quantile-quantile (QQ) plot and distribution plot before (**A** and **B**) and after normalization (**D** and **E**) were shown. We compared MCV in the non-severe and severe COVID-19 patients before (**C**,  $p = 0.64$ , Wilcoxon test) and after normalization (**F**,  $p = 0.73$ , T-test). We further performed association analyses between the 35 genetic variants and MCV using T-test and Pearson correlation. (**G**) Variants  $\Delta 729-737$  and G1820A pass P value cut-off of 0.05 in T test. Red indicates higher mean value in cases with the variants and blue indicates higher mean value in cases without the variant. The size of symbols indicates absolute Z score number. (**H**) Variant C29095T has P value lower than 0.05 in Pearson correlation. Red and blue indicates positive and negative correlation, respectively. Size of the dots indicate absolute correlation coefficient. (**I**) After sorting Z score values of MCV, cases with G27967T and G28878A tend to have the highest Z score, whereas cases with C19637T and C29586T have the lowest.

## 84. Mg<sup>2+</sup> (serum magnesium)

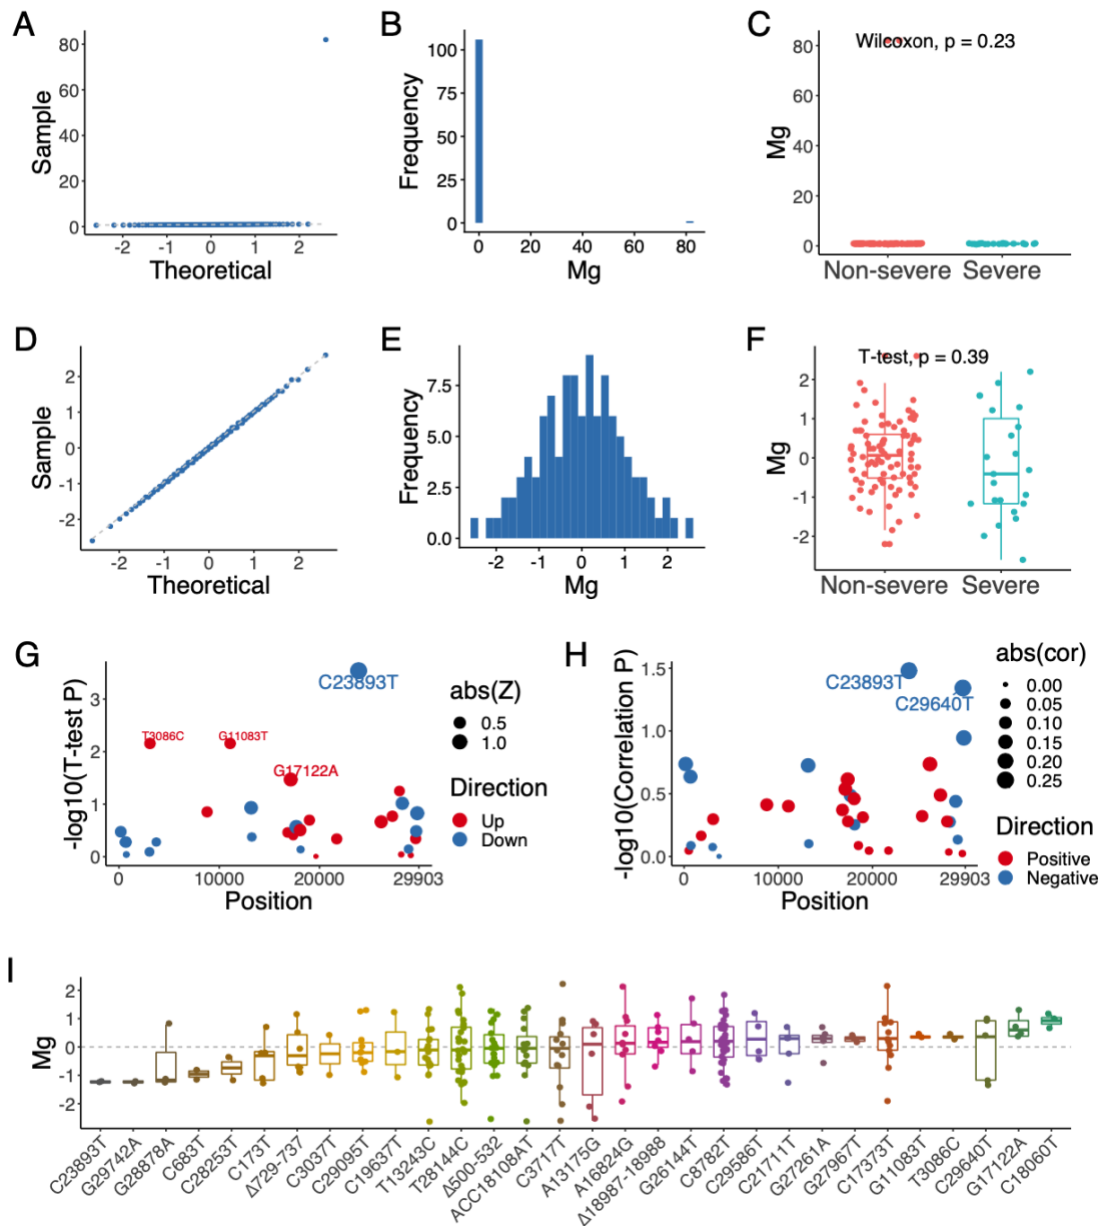

For Mg<sup>2+</sup> (serum magnesium, mmol/L), quantile-quantile (QQ) plot and distribution plot before (A and B) and after normalization (D and E) were shown. We compared Mg in the non-severe and severe COVID-19 patients before (C,  $p = 0.23$ , Wilcoxon test) and after normalization (F,  $p = 0.39$ , T-test). We further performed association analyses between the 35 genetic variants and Mg using T-test and Pearson correlation. (G) Variants T3086C, G11083T, G17122A and C23893T pass P value cut-off of 0.05 in T test. Red indicates higher mean value in cases with the variants and blue indicates higher mean value in cases without the variant. The size of symbols indicates absolute Z score number. (H) Variants C23893T and C29640T have P value lower than 0.05 in Pearson correlation. Red and blue indicates positive and negative correlation, respectively. Size of the dots indicate absolute correlation coefficient. (I) After sorting Z score values of Mg<sup>2+</sup>, cases with C18060T and G17122A tend to have the highest Z score, whereas cases with C23893T and G29742A have the lowest.



## 85. Monocyte (monocyte count)

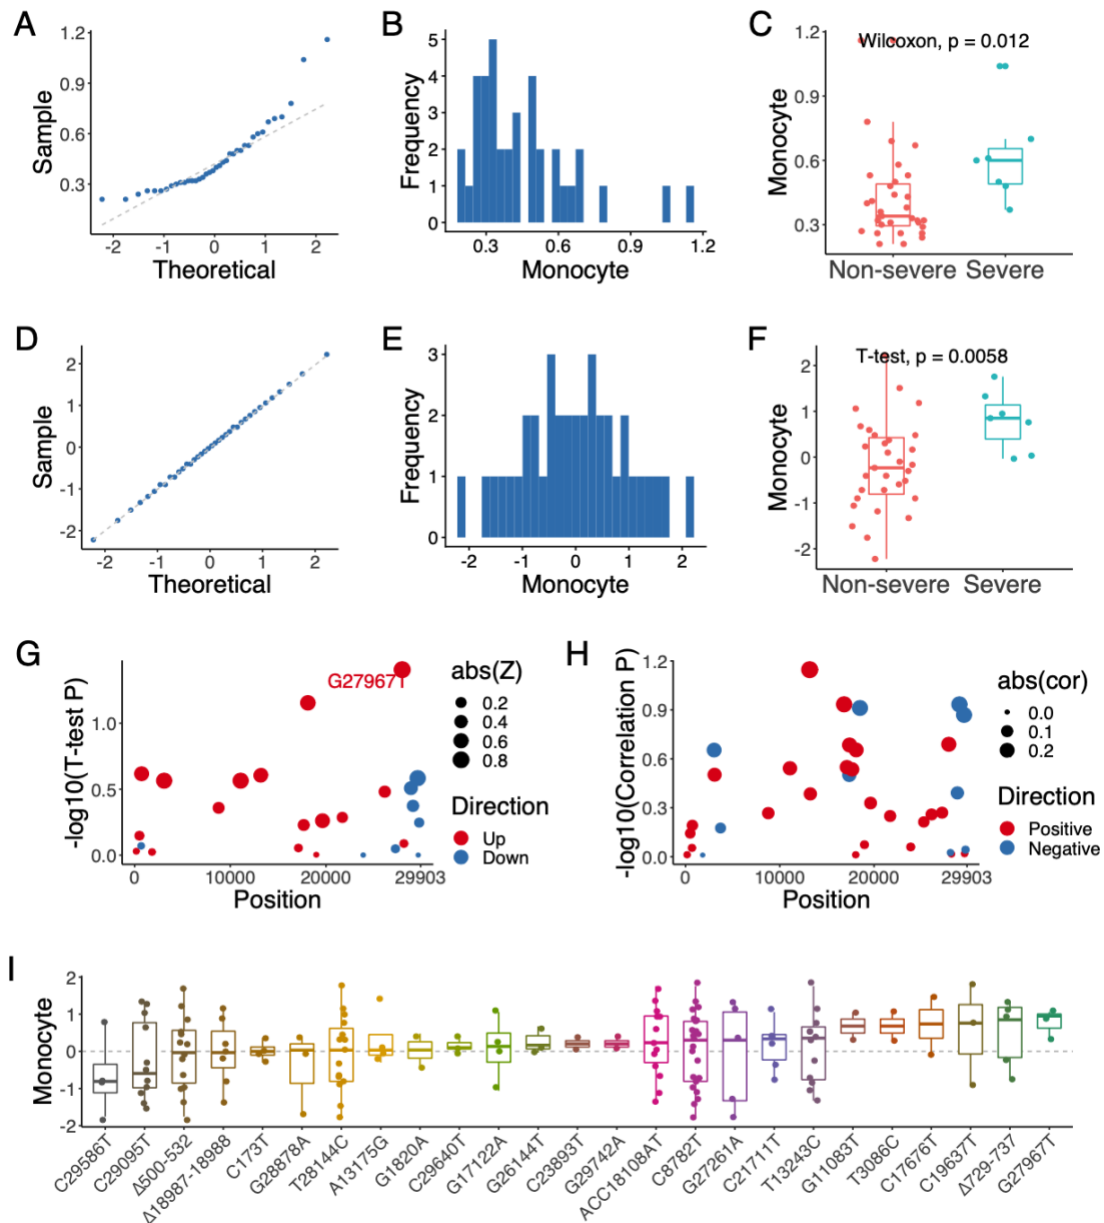

For monocyte (monocyte count,  $\times 10^9/\text{L}$ ), quantile-quantile (QQ) plot and distribution plot before (A and B) and after normalization (D and E) were shown. We compared monocyte in the non-severe and severe COVID-19 patients before (C,  $p = 1.2 \times 10^{-2}$ , Wilcoxon test) and after normalization (F,  $p = 5.8 \times 10^{-3}$ , T-test). We further performed association analyses between the 35 genetic variants and monocyte using T-test and Pearson correlation. (G) Variant G27967T passes P value cut-off of 0.05 in T test. Red indicates higher mean value in cases with the variants and blue indicates higher mean value in cases without the variant. The size of symbols indicates absolute Z score number. (H) No variant in Pearson correlation has P value below 0.05. After sorting Z score values of monocyte, cases with G27967T and  $\Delta$ 729-737 tend to have the highest Z score, whereas cases with C29586T and C29095T have the lowest.

## 86. Monocyte % (monocyte percentage)

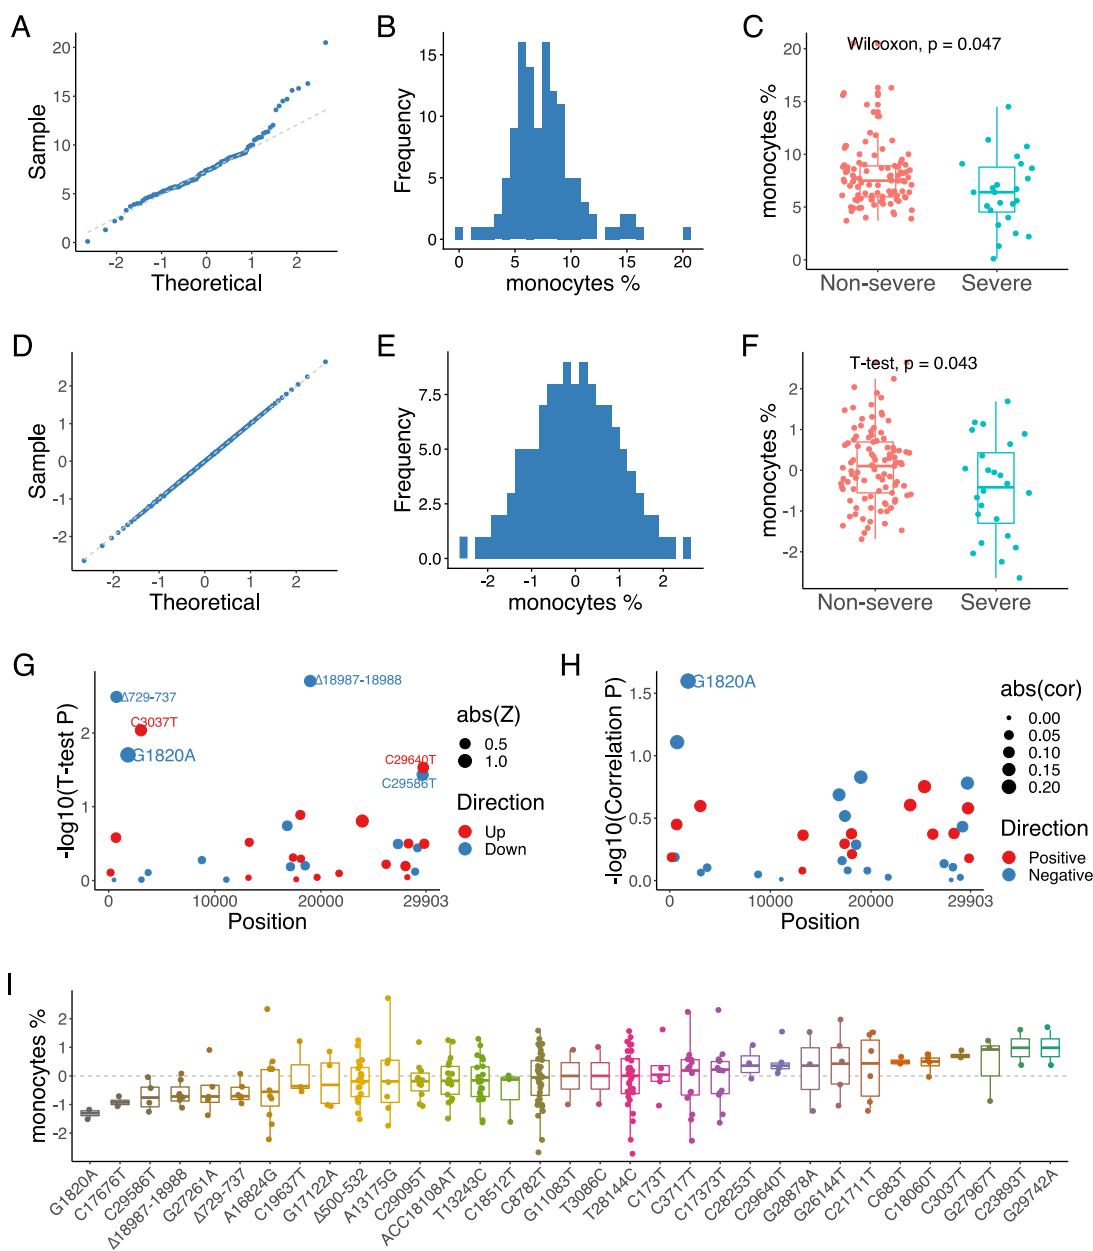

For Monocyte % (monocyte percentage), quantile-quantile (QQ) plot and distribution plot before (**A** and **B**) and after normalization (**D** and **E**) were shown. We compared Monocyte % in the non-severe and severe COVID-19 patients before (**C**,  $p = 0.047$ , Wilcoxon test) and after normalization (**F**,  $p = 0.043$ , T-test). (**G**) Variants  $\Delta 18987-18988$ ,  $\Delta 729-737$ ,  $C3037T$ ,  $G1820A$ ,  $C29640T$  and  $C29586T$  pass P value cut-off of 0.05 in T test. Red indicates higher mean value in cases with the variants and blue indicates higher mean value in cases without the variant. The size of symbols indicates absolute Z score number. (**H**) Variants  $G1820A$  have P value lower than 0.05 in Pearson correlation. Red and blue indicates positive and negative correlation, respectively. Size of the dots indicate absolute correlation coefficient. (**I**) After sorting Z score values of Monocyte %, cases with  $G29742A$  and  $C23893T$  tend to have the highest Z score, whereas cases with  $G1820A$  and  $C17676T$  have the lowest.

## 87. Na<sup>+</sup> (serum sodium)

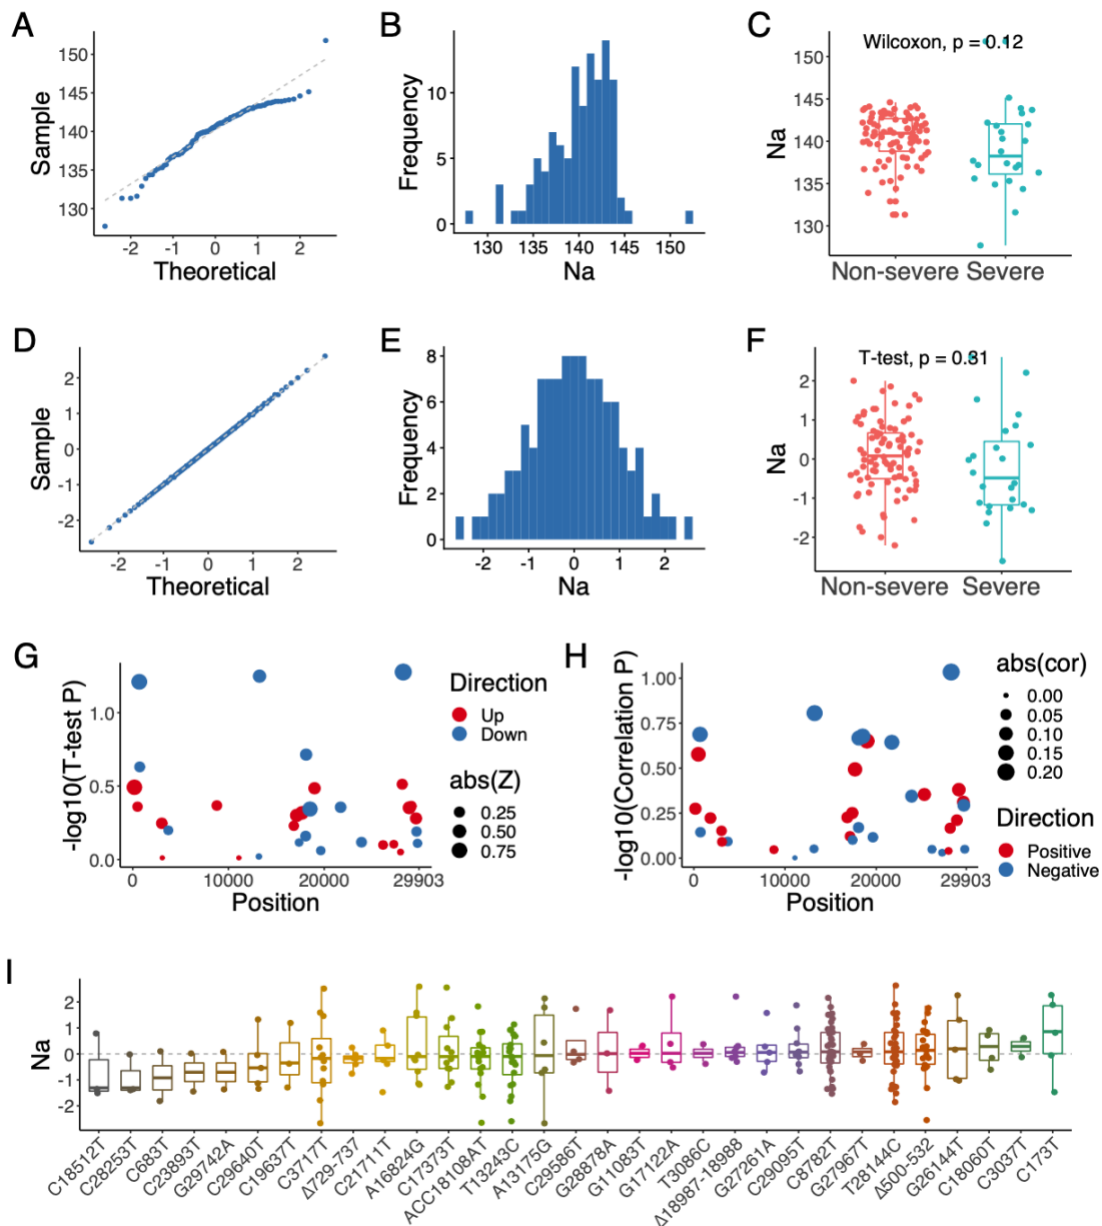

For Na<sup>+</sup> (serum sodium, mmol/L), quantile-quantile (QQ) plot and distribution plot before (**A** and **B**) and after normalization (**D** and **E**) were shown. We compared Na in the non-severe and severe COVID-19 patients before (**C**, p = 0.12, Wilcoxon test) and after normalization (**F**, p = 0.31, T-test). We further performed association analyses between the 35 genetic variants and Na using T-test and Pearson correlation. (**G**) No variant in the T test (**G**) and Pearson correlation was with P value below 0.05 (**H**). After sorting Z score values of Na, cases with C173T and C3037T tend to have the highest Z score, whereas cases with C18512T and C28253T have the lowest.

## 88. NK cell count

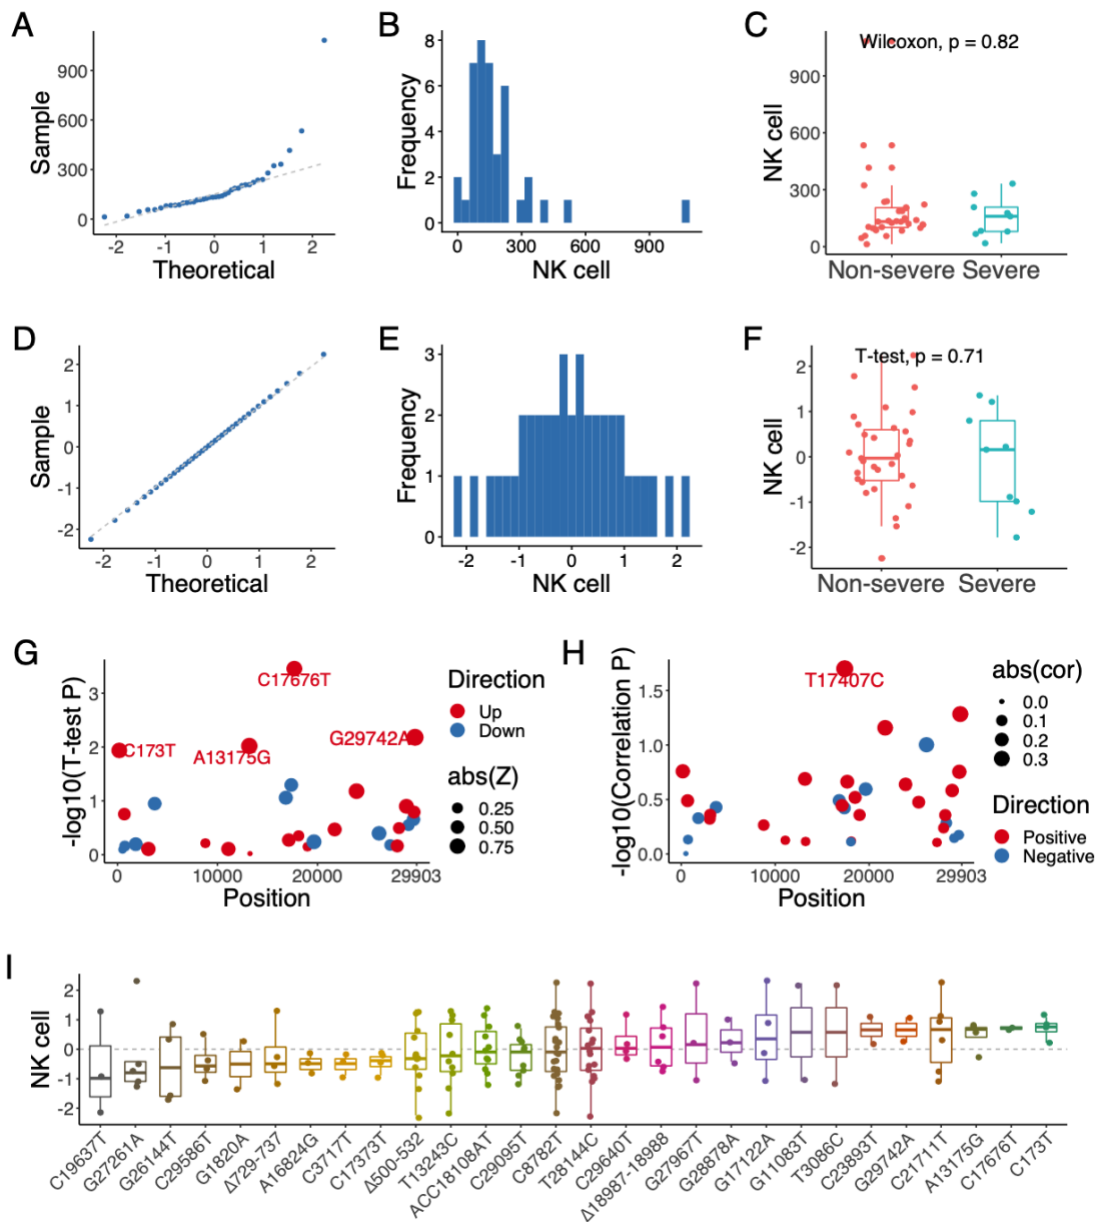

For NK cell count (cell/ $\mu$ l), quantile-quantile (QQ) plot and distribution plot before (**A** and **B**) and after normalization (**D** and **E**) were shown. We compared NK cell in the non-severe and severe COVID-19 patients before (**C**,  $p = 0.82$ , Wilcoxon test) and after normalization (**F**,  $p = 0.71$ , T-test). We further performed association analyses between the 35 genetic variants and NK cell using T-test and Pearson correlation. (**G**) Variants C173T, A13175G, C17676T and G29742A pass  $P$  value cut-off of 0.05 in T test. Red indicates higher mean value in cases with the variants and blue indicates higher mean value in cases without the variant. The size of symbols indicates absolute  $Z$  score number. (**H**) Variant T17407C has  $P$  value lower than 0.05 in Pearson correlation. Red and blue indicates positive and negative correlation, respectively. Size of the dots indicate absolute correlation coefficient. (**I**) After sorting  $Z$  score values of NK cell, cases with C173T and C17676T tend to have the highest  $Z$  score, whereas cases with C19637T and G27261A have the lowest.

## 89. NK cell percentage

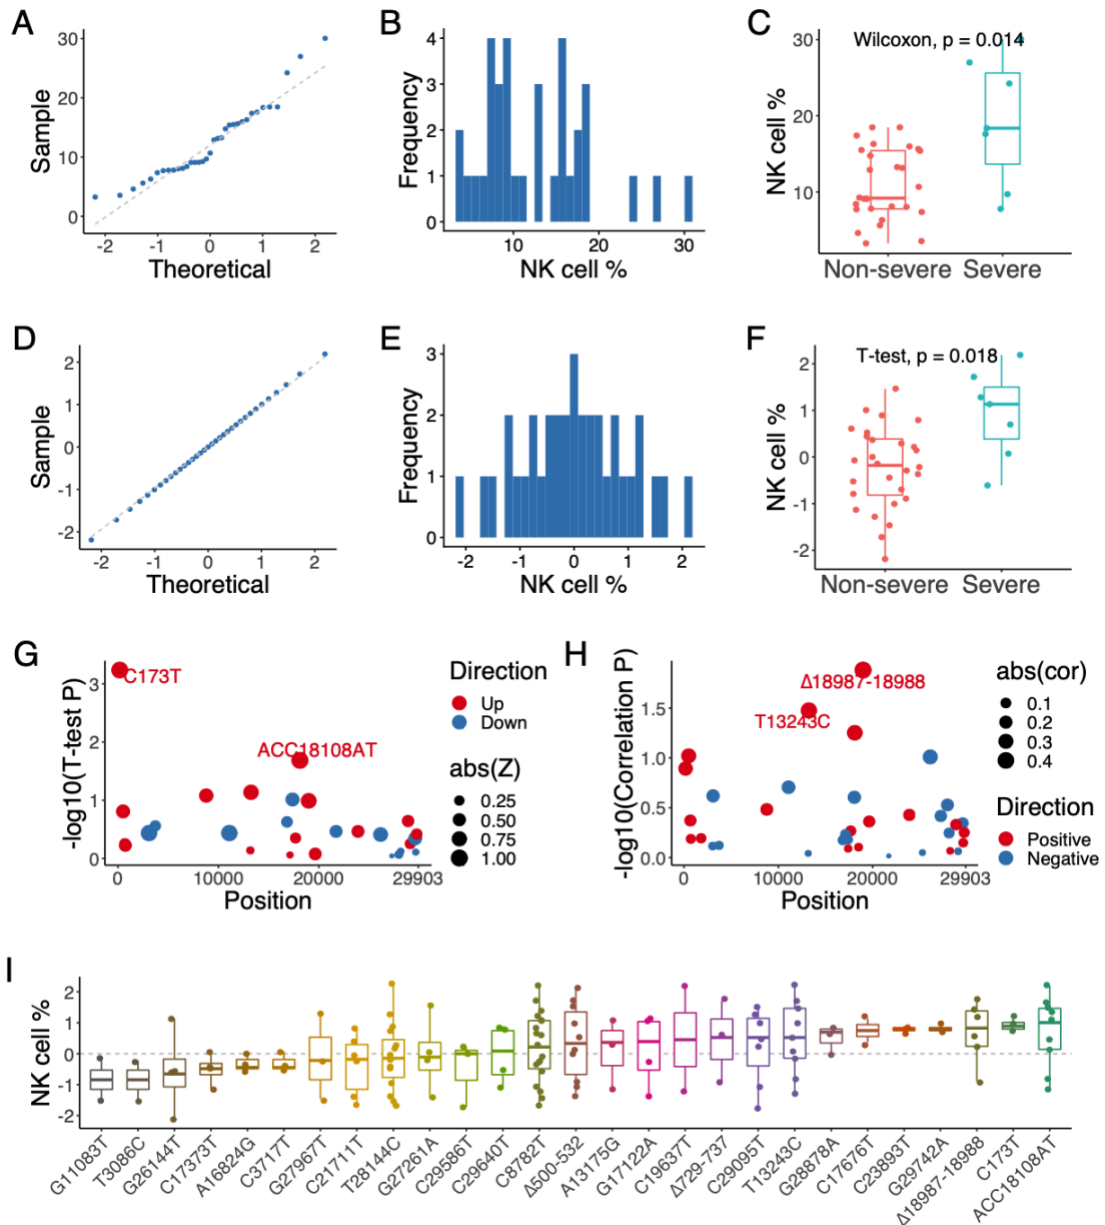

For NK cell % (NK cell percentage, %), quantile-quantile (QQ) plot and distribution plot before (A and B) and after normalization (D and E) were shown. We compared NK cell % in the non-severe and severe COVID-19 patients before (C,  $p = 1.4 \times 10^{-2}$ , Wilcoxon test) and after normalization (F,  $p = 1.8 \times 10^{-2}$ , T-test). We further performed association analyses between the 35 genetic variants and NK cell % using T-test and Pearson correlation. (G) Variants C173T and ACC18108AT pass P value cut-off of 0.05 in T test. Red indicates higher mean value in cases with the variants and blue indicates higher mean value in cases without the variant. The size of symbols indicates absolute Z score number. (H) Variants  $\Delta 18987-18988$  and T13243C have P value lower than 0.05 in Pearson correlation. Red and blue indicates positive and negative correlation, respectively. Size of the dots indicate absolute correlation coefficient. (I) After sorting Z score values of NK cell %, cases with C173T and ACC18108AT tend to have the highest Z score, whereas cases with G11083T and T3086C have the lowest.

## 90. Normal likelihood (diagnostic accuracy of normal)

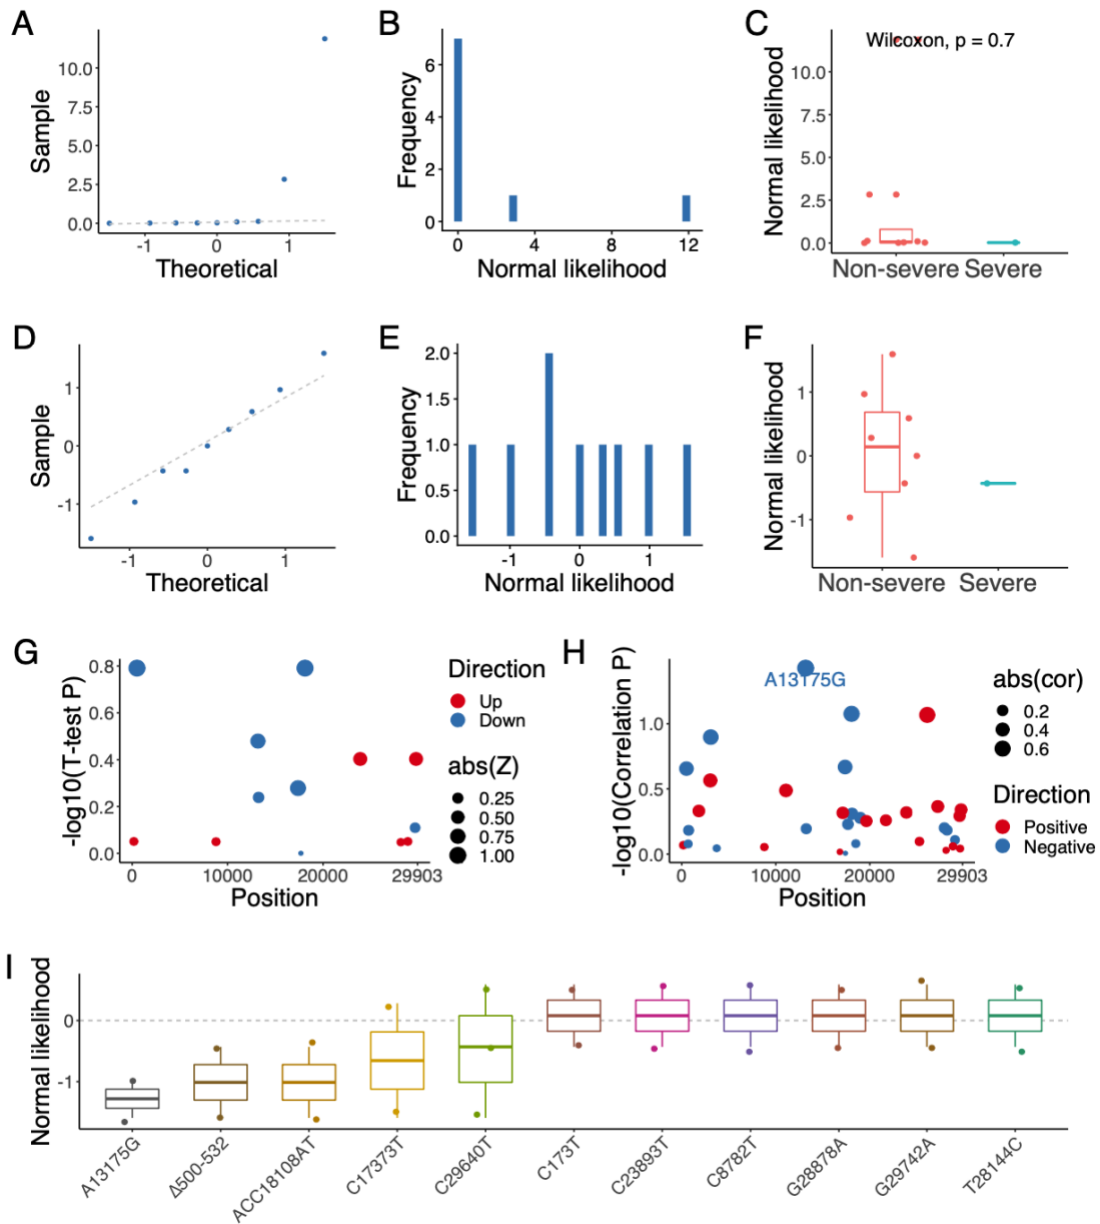

For normal likelihood (diagnostic accuracy of normal, %), quantile-quantile (QQ) plot and distribution plot before (A and B) and after normalization (D and E) were shown. We compared normal likelihood in the non-severe and severe COVID-19 patients before (C,  $p = 0.7$ , Wilcoxon test) and after normalization (F). We further performed association analyses between the 35 genetic variants and normal likelihood using T-test and Pearson correlation. (G) No variant passes P value cut-off of 0.05 in T test. Red indicates higher mean value in cases with the variants and blue indicates higher mean value in cases without the variant. The size of symbols indicates absolute Z score number. (H) Variant A13175G in Pearson correlation was with P value below 0.05 (H). After sorting Z score values of normal likelihood, cases with T28144C and G29742A tend to have the highest Z score, whereas cases with A13175G and  $\Delta 500\text{-}532$  have the lowest.

## 91. Other pneumonia

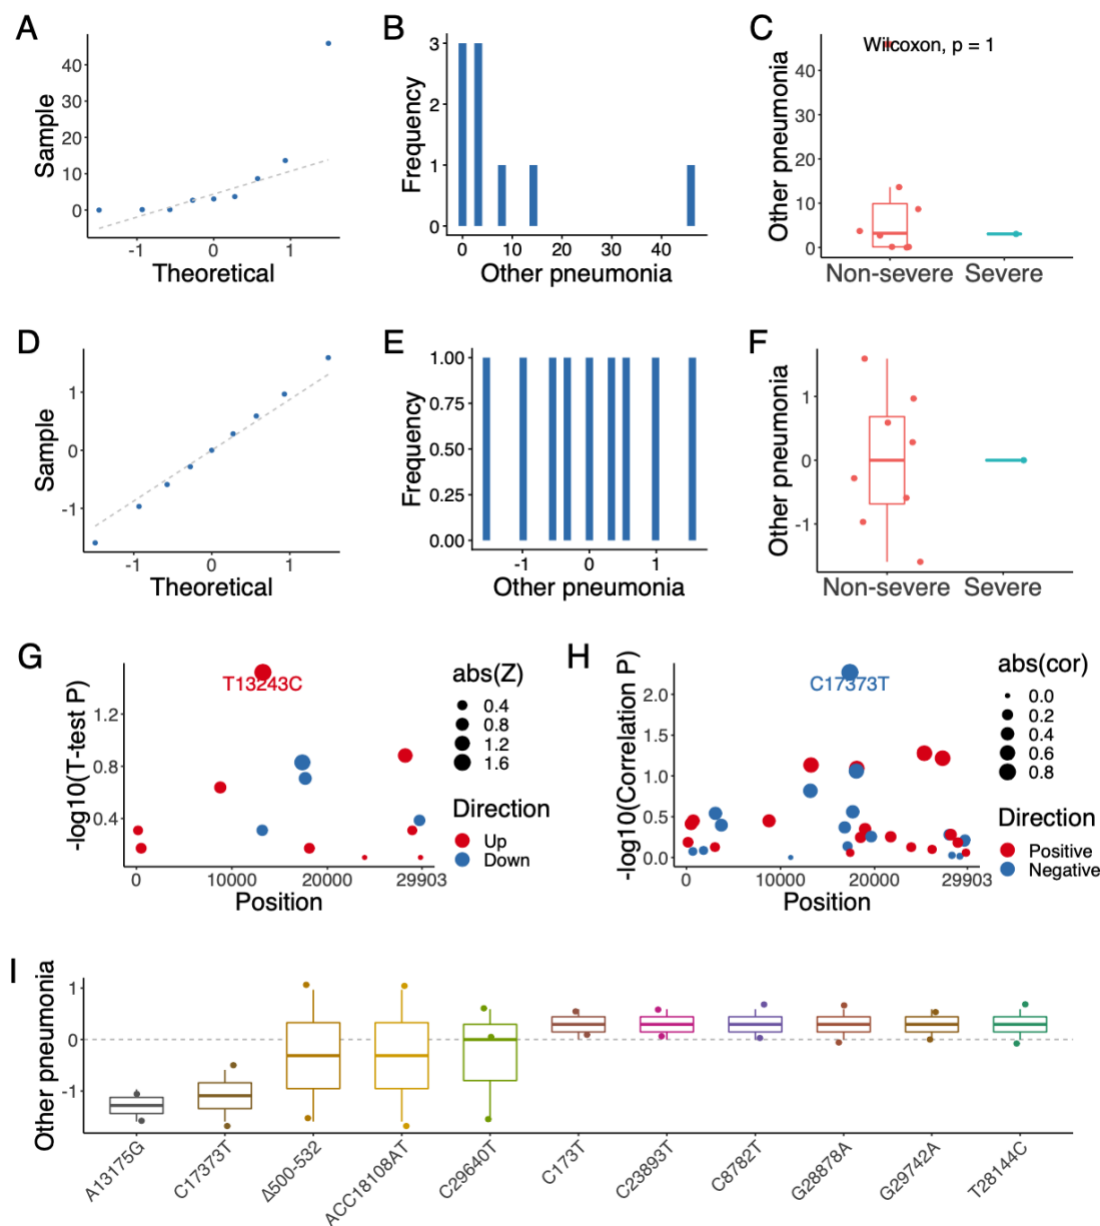

For other pneumonia (%), quantile-quantile (QQ) plot and distribution plot before (A and B) and after normalization (D and E) were shown. We compared other pneumonia in the non-severe and severe COVID-19 patients before (C,  $p = 1$ , Wilcoxon test) and after normalization (F). We further performed association analyses between the 35 genetic variants and other pneumonia using T-test and Pearson correlation. (G) Variant T13243C passes P value cut-off of 0.05 in T test. Red indicates higher mean value in cases with the variants and blue indicates higher mean value in cases without the variant. The size of symbols indicates absolute Z score number. (H) Variant C17373T has P value lower than 0.05 in Pearson correlation. Red and blue indicates positive and negative correlation, respectively. Size of the dots indicate absolute correlation coefficient. (I) After sorting Z score values of other pneumonia, cases with T28144C and G29742A tend to have the highest Z score, whereas cases with A13175G and C17373T have the lowest.

## 92. Oxygen therapy

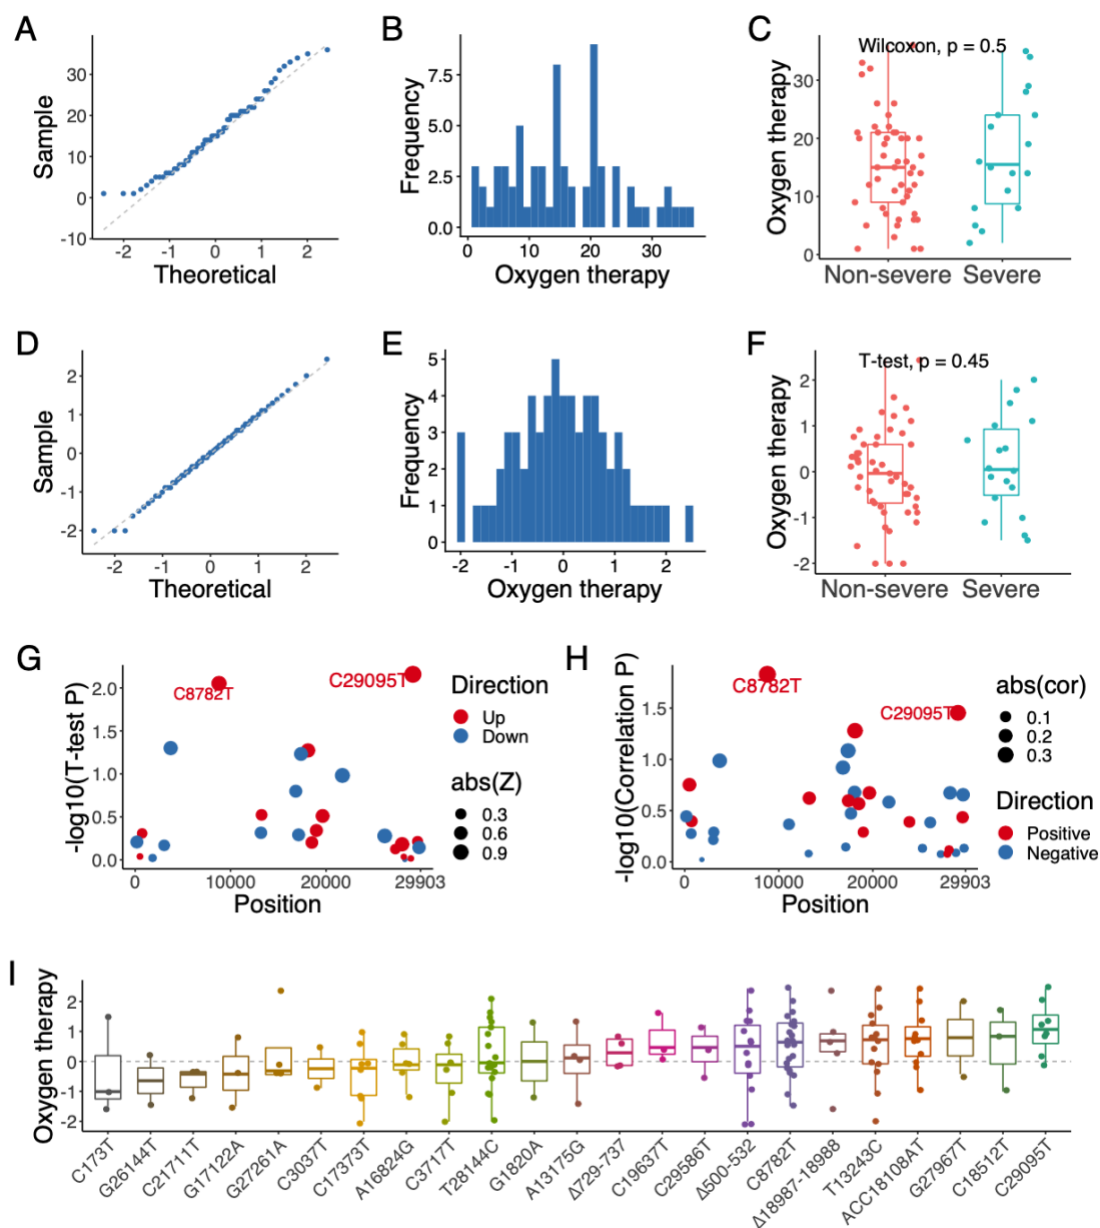

For oxygen therapy (day), quantile-quantile (QQ) plot and distribution plot before (**A** and **B**) and after normalization (**D** and **E**) were shown. We compared oxygen therapy in the non-severe and severe COVID-19 patients before (**C**,  $p = 0.50$ , Wilcoxon test) and after normalization (**F**,  $p = 0.45$ , T-test). We further performed association analyses between the 35 genetic variants and oxygen therapy using T-test and Pearson correlation. (**G**) Variants C8782T and C29095T in the T test (**G**) and Pearson correlation were both with P value below 0.05 (**H**). After sorting Z score values of oxygen therapy, cases with C29095T and C18512T tend to have the highest Z score, whereas cases with C173T and G26144T have the lowest.



### 93. P (serum phosphorus)

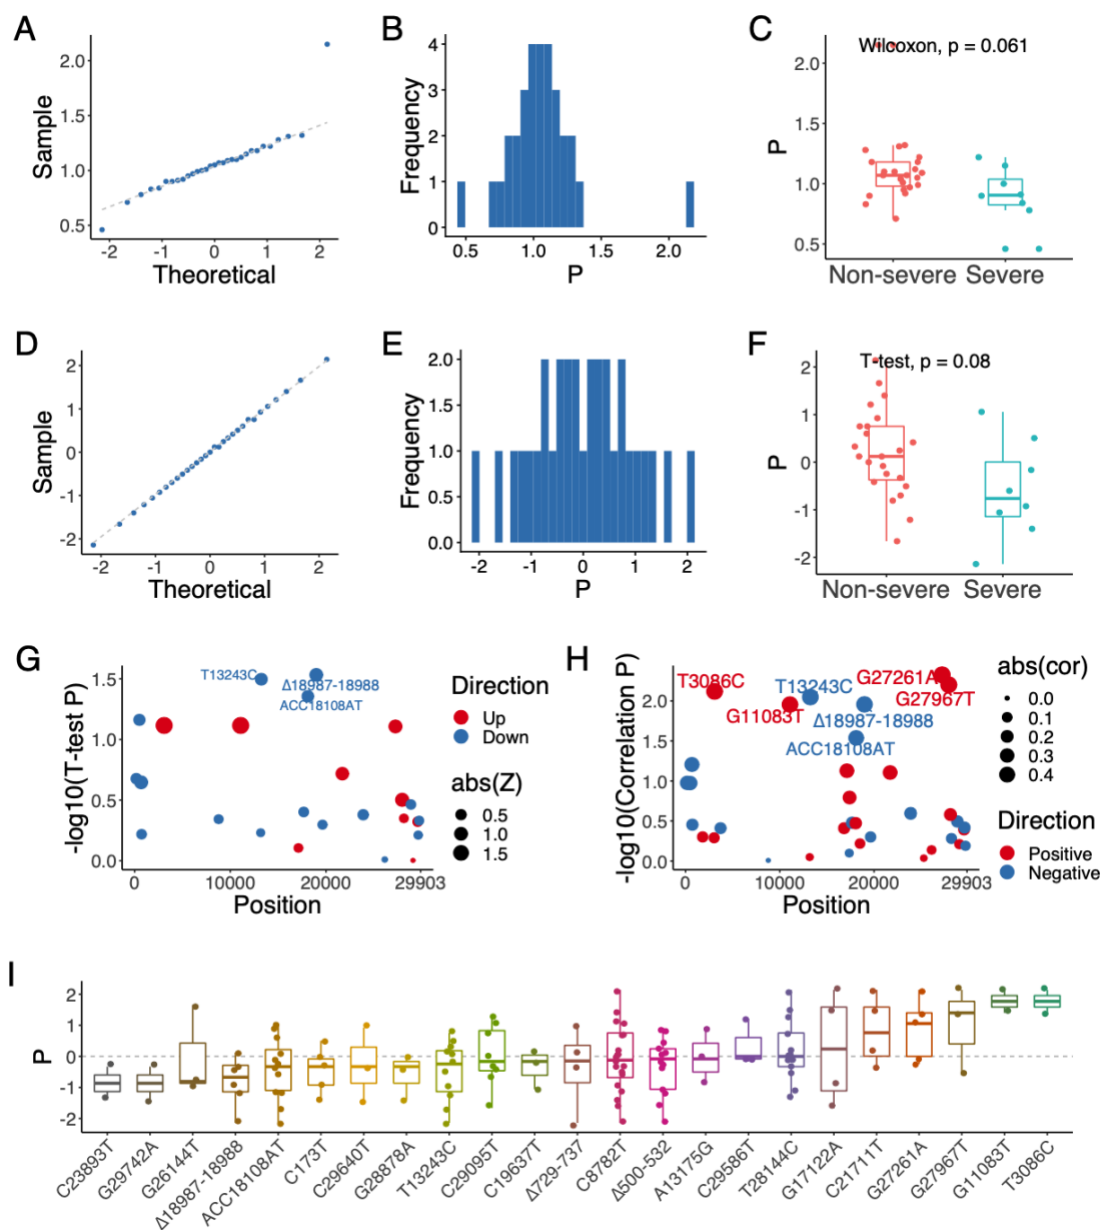

For P (serum phosphorus, mmol/L), quantile-quantile (QQ) plot and distribution plot before (A and B) and after normalization (D and E) were shown. We compared P in the non-severe and severe COVID-19 patients before (C,  $p = 0.061$ , Wilcoxon test) and after normalization (F,  $p = 0.08$ , T-test). (G) Variants T13243C,  $\Delta 18987-18988$  and ACC18108AT pass P value cut-off of 0.05 in T test. Red indicates higher mean value in cases with the variants and blue indicates higher mean value in cases without the variant. The size of symbols indicates absolute Z score number. (H) Variants T3086C, G11083T, G27261A, G27967T, T13243C, ACC18108AT and  $\Delta 18987-18988$  have P value lower than 0.05 in Pearson correlation. Red and blue indicates positive and negative correlation, respectively. Size of the dots indicate absolute correlation coefficient. (I) After sorting Z score values of P, cases with T3086C and G11083T tend to have the highest Z score, whereas cases with C23893T and G29742A have the lowest.

## 94. PaO<sub>2</sub> (partial pressure of oxygen)

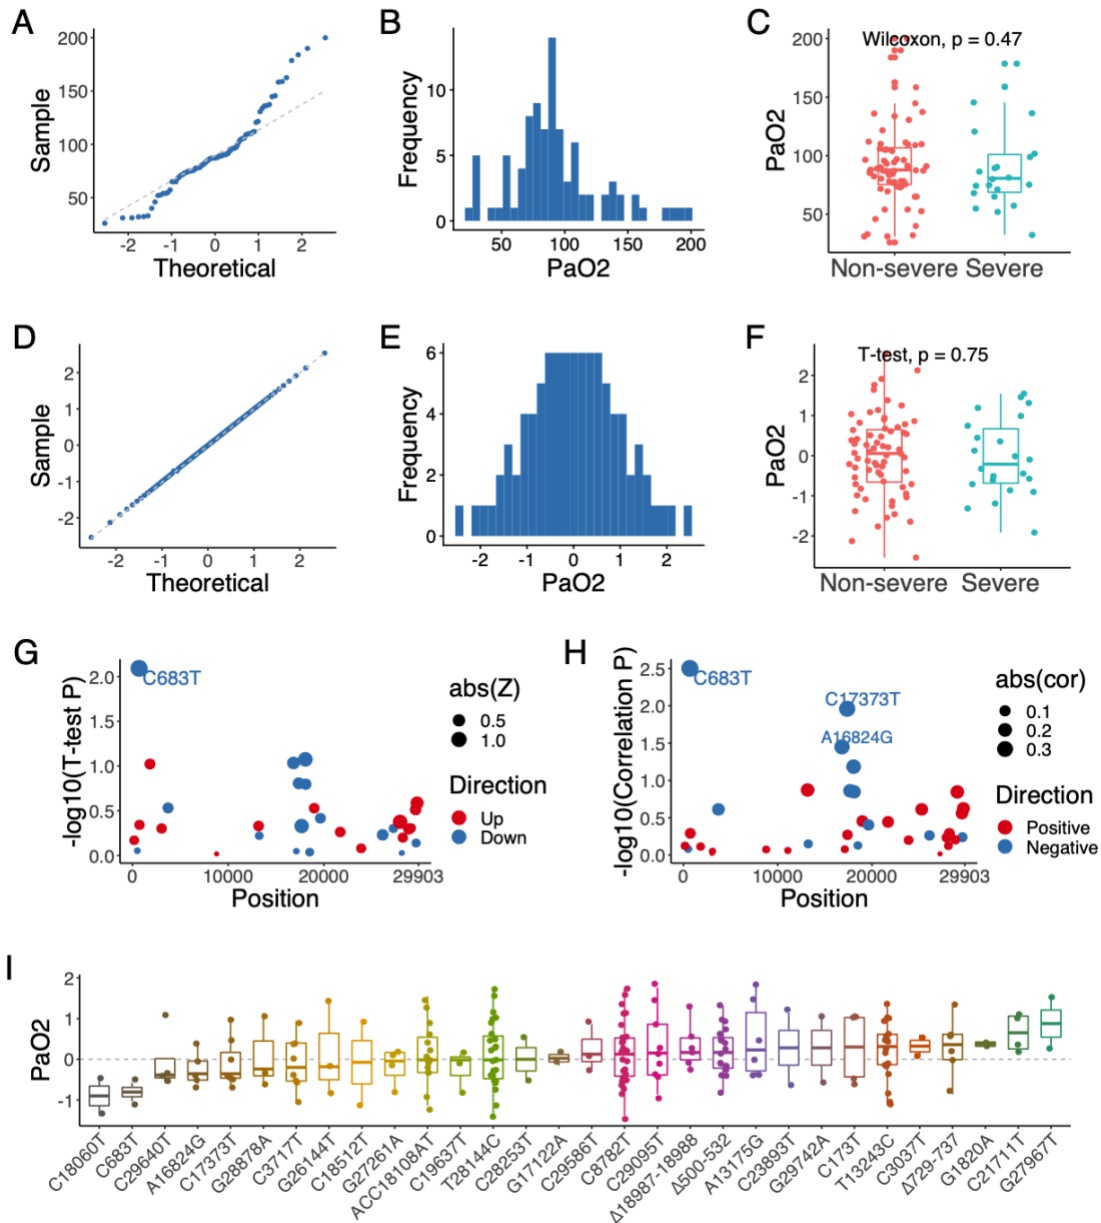

For PaO<sub>2</sub> (partial pressure of oxygen, mmHg), quantile-quantile (QQ) plot and distribution plot before (A and B) and after normalization (D and E) were shown. We compared PaO<sub>2</sub> in the non-severe and severe COVID-19 patients before (C,  $p = 0.47$ , Wilcoxon test) and after normalization (F,  $p = 0.75$ , T-test). We further performed association analyses between the 35 genetic variants and PaO<sub>2</sub> using T-test and Pearson correlation. (G) Variant C683T passes P value cut-off of 0.05 in T test. Red indicates higher mean value in cases with the variants and blue indicates higher mean value in cases without the variant. The size of symbols indicates absolute Z score number. (H) Variants C683T, C17373T and A16824G have P value lower than 0.05 in Pearson correlation. Red and blue indicates positive and negative correlation, respectively. Size of the dots indicate absolute correlation coefficient. (I) After sorting Z score values of PaO<sub>2</sub>, cases with C21711T and G27967T tend to have the highest Z score, whereas cases with C18060T and C683T have the lowest.

## 95. PCO<sub>2</sub> (partial pressure of carbon dioxide)

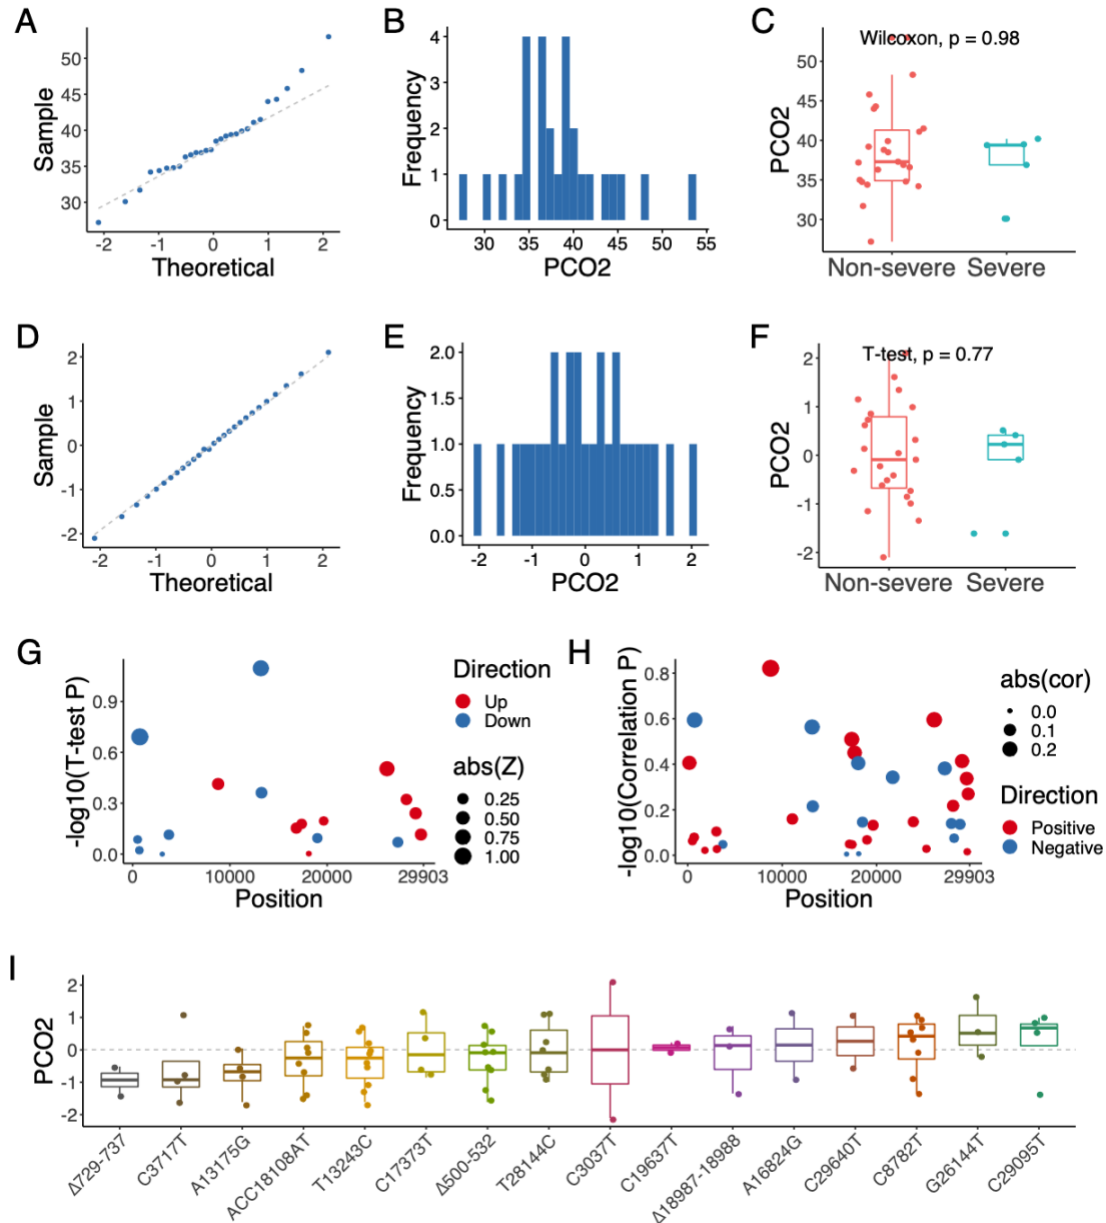

For PCO<sub>2</sub> (partial pressure of carbon dioxide, mmHg), quantile-quantile (QQ) plot and distribution plot before (A and B) and after normalization (D and E) were shown. We compared PCO<sub>2</sub> in the non-severe and severe COVID-19 patients before (C,  $p = 0.98$ , Wilcoxon test) and after normalization (F,  $p = 0.77$ , T-test). We further performed association analyses between the 35 genetic variants and PCO<sub>2</sub> using T-test and Pearson correlation. No variant passes P value cut-off of 0.05 in T test (G) or exceeds correlation P value cut-off of 0.05 (H). (I) After sorting Z score values of PCO<sub>2</sub>, cases with C29095T and G26144T tend to have the highest Z score, whereas cases with  $\Delta 729-737$  and C3717T have the lowest.

## 96. PCT (procalcitonin)

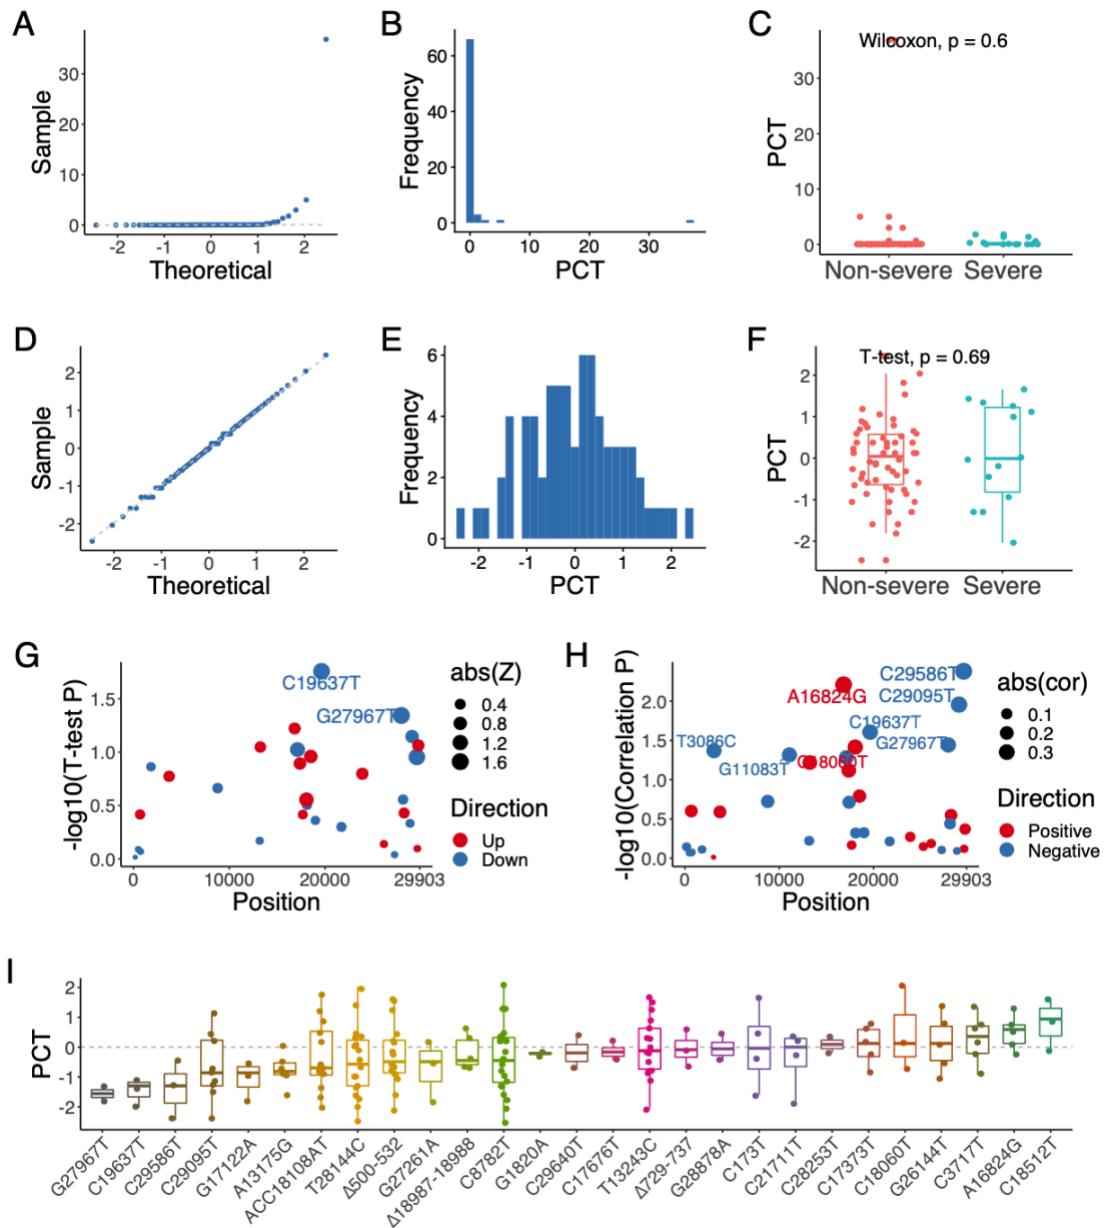

For PCT (procalcitonin, ng/mL), quantile-quantile (QQ) plot and distribution plot before (A and B) and after normalization (D and E) were shown. We compared PCT in the non-severe and severe COVID-19 patients before (C,  $p = 0.60$ , Wilcoxon test) and after normalization (F,  $p = 0.69$ , T-test). We further performed association analyses between the 35 genetic variants and PCT using T-test and Pearson correlation. (G) Variants C19637T and G27967T pass P value cut-off of 0.05 in T test. Red indicates higher mean value in cases with the variants and blue indicates higher mean value in cases without the variant. The size of symbols indicates absolute Z score number. (H) Variant C18060T, T3086C, G11083T, A16824G, C29586T, C29095T, C19627T and G27967T in Pearson correlation were with PCT value below 0.05 (H). After sorting Z score values of PCT, cases with C18512T and A16824G tend to have the highest Z score, whereas cases with G27967T and C19637T have the lowest.

## 97. PCV (packed cell volume)

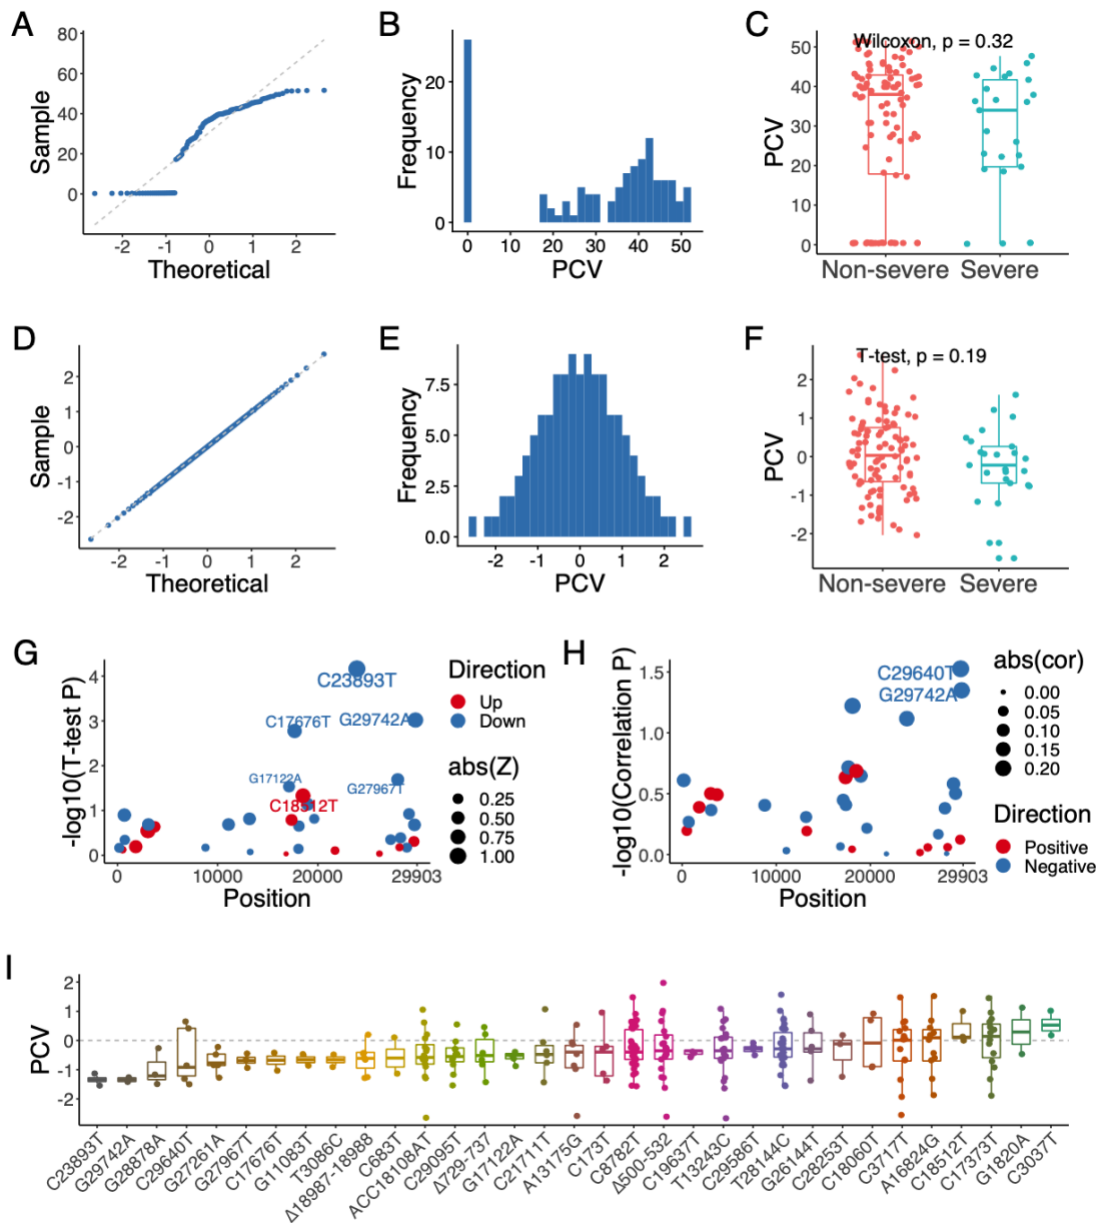

For PCV (packed cell volume, %), quantile-quantile (QQ) plot and distribution plot before (**A** and **B**) and after normalization (**D** and **E**) were shown. We compared PCV in the non-severe and severe COVID-19 patients before (**C**,  $p = 0.32$ , Wilcoxon test) and after normalization (**F**,  $p = 0.19$ , T-test). We further performed association analyses between the 35 genetic variants and PCV using T-test and Pearson correlation. (**G**) Variants C23893T, C17676T, G29742A, G17122A, G27967T and C18512T pass P value cut-off of 0.05 in T test. Red indicates higher mean value in cases with the variants and blue indicates higher mean value in cases without the variant. The size of symbols indicates absolute Z score number. (**H**) Variants C29640T and G29742A in Pearson correlation were with PCV value below 0.05 (**H**). After sorting Z score values of PCV, cases with C3037T and G1820A tend to have the highest Z score, whereas cases with C23893T and G29742A have the lowest.

## 98. Pleural effusion (interstitium thickness)

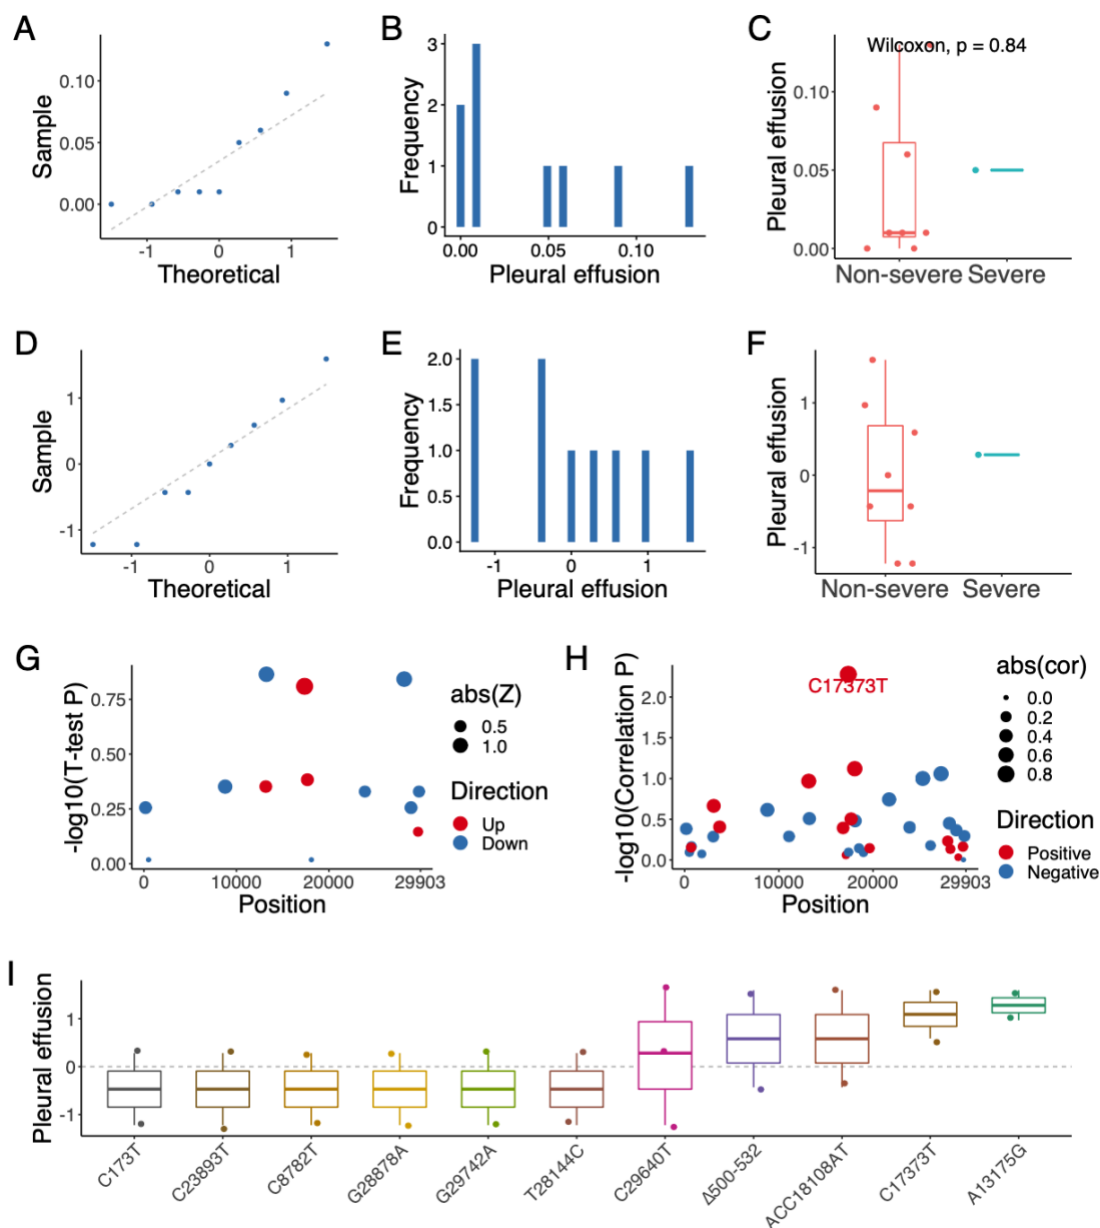

For pleural effusion (interstitium thickness, %), quantile-quantile (QQ) plot and distribution plot before (A and B) and after normalization (D and E) were shown. We compared pleural effusion in the non-severe and severe COVID-19 patients before (C,  $p = 0.84$ , Wilcoxon test) and after normalization (F). We further performed association analyses between the 35 genetic variants and pleural effusion using T-test and Pearson correlation. (G) No variant in the T test (G) variant C17373T in Pearson correlation was with P value below 0.05 (H). After sorting Z score values of pleural effusion, cases with A13175G and C17373T tend to have the highest Z score, whereas cases with C173T and C23893T have the lowest.

## 99. Pleural effusion volume (volume of interstitium thickness)

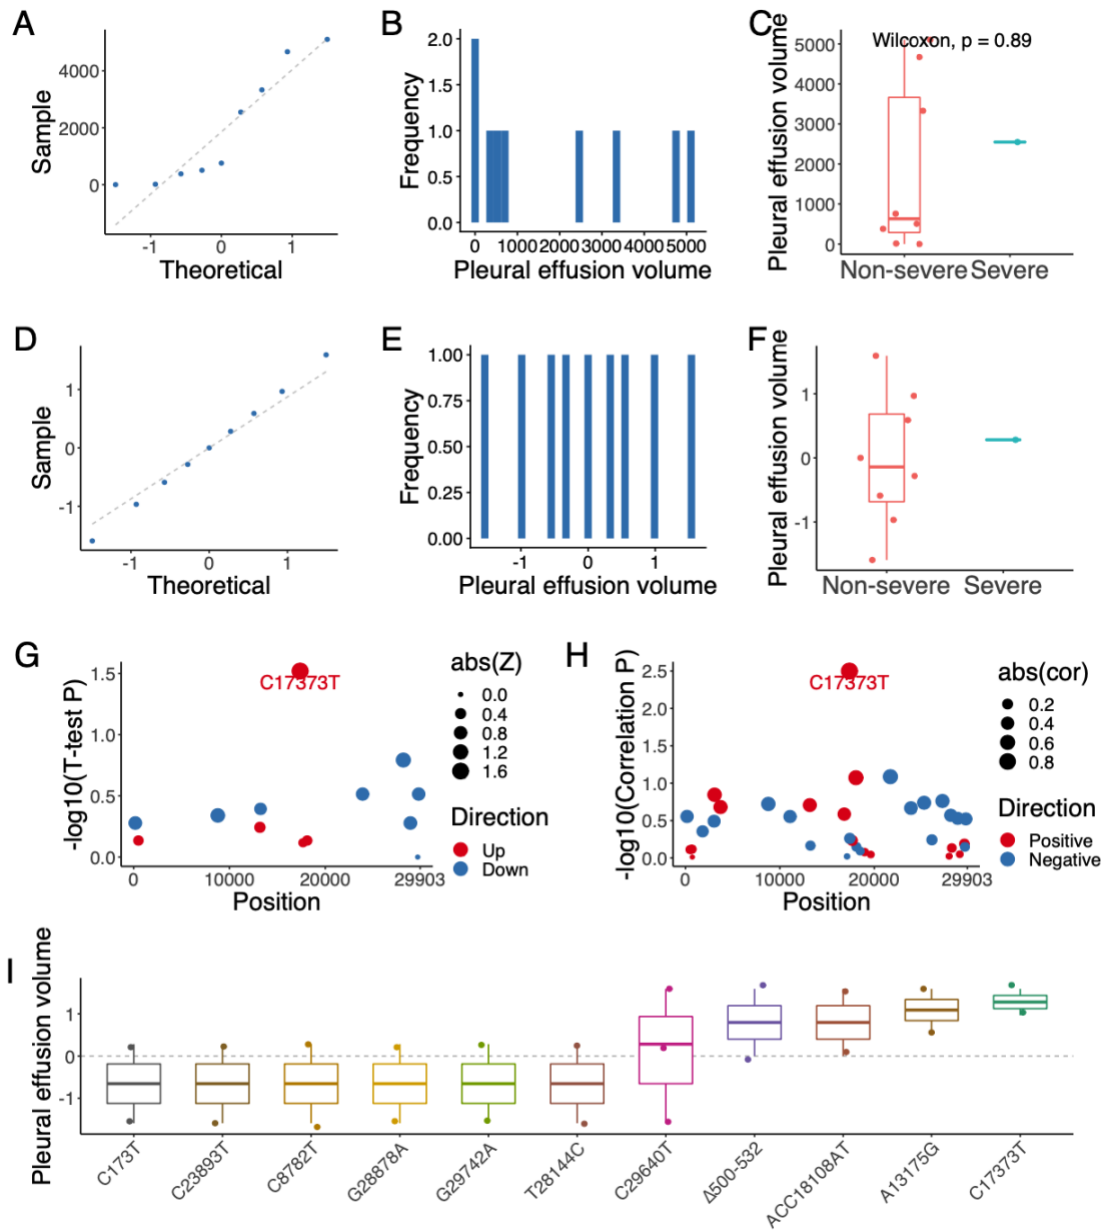

For pleural effusion volume (volume of interstitium thickness,  $\text{mm}^3$ ), quantile-quantile (QQ) plot and distribution plot before (A and B) and after normalization (D and E) were shown. We compared pleural effusion volume in the non-severe and severe COVID-19 patients before (C,  $p = 0.89$ , Wilcoxon test) and after normalization (F). We further performed association analyses between the 35 genetic variants and pleural effusion volume using T-test and Pearson correlation. (G) Variant C17373T in the T test (G) and in Pearson correlation was both with P value below 0.05 (H). After sorting Z score values of pleural effusion volume, cases with C17373T and A13175G tend to have the highest Z score, whereas cases with C173T and C23893T have the lowest.

## 100. PLT (platelet count)

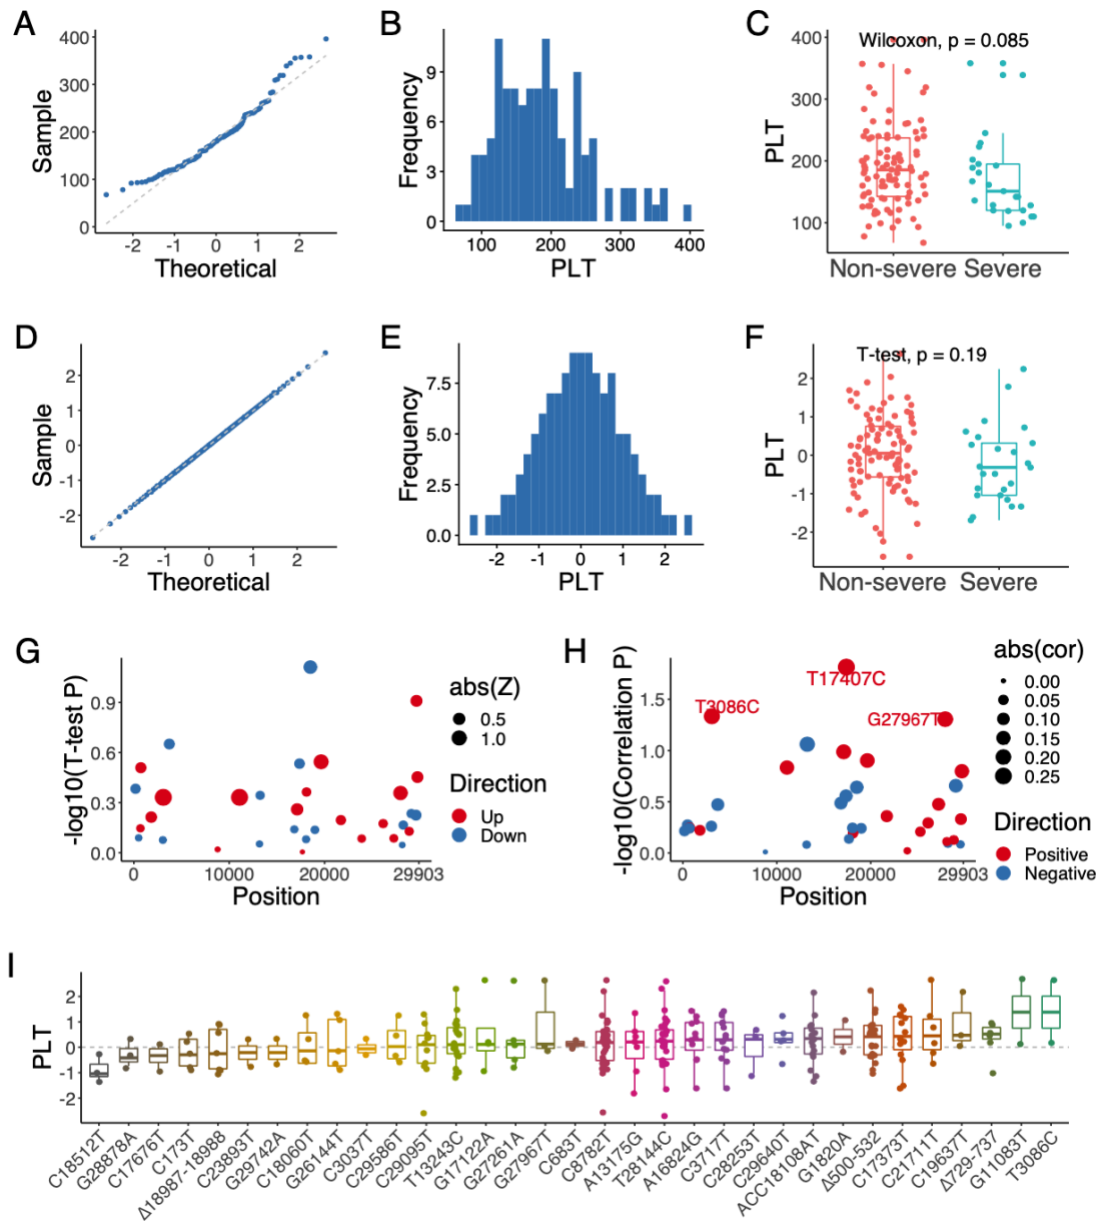

For PLT (platelet count,  $\times 10^9/\text{L}$ ), quantile-quantile (QQ) plot and distribution plot before (**A** and **B**) and after normalization (**D** and **E**) were shown. We compared PLT in the non-severe and severe COVID-19 patients before (**C**,  $p = 0.085$ , Wilcoxon test) and after normalization (**F**,  $p = 0.190$ , T-test). We further performed association analyses between the 35 genetic variants and PLT using T-test and Pearson correlation. (**G**) No variant passes P value cut-off of 0.05 in T test. Red indicates higher mean value in cases with the variants and blue indicates higher mean value in cases without the variant. The size of symbols indicates absolute Z score number. (**H**) Variants T3086C, T17407C and G27967T have P value lower than 0.05 in Pearson correlation. Red and blue indicates positive and negative correlation, respectively. Size of the dots indicate absolute correlation coefficient. (**I**) After sorting Z score values of PLT, cases with T3086C and G11083T tend to have the highest Z score, whereas cases with C18512T and G28878A have the lowest.



## 101. PT (prothrombin time)

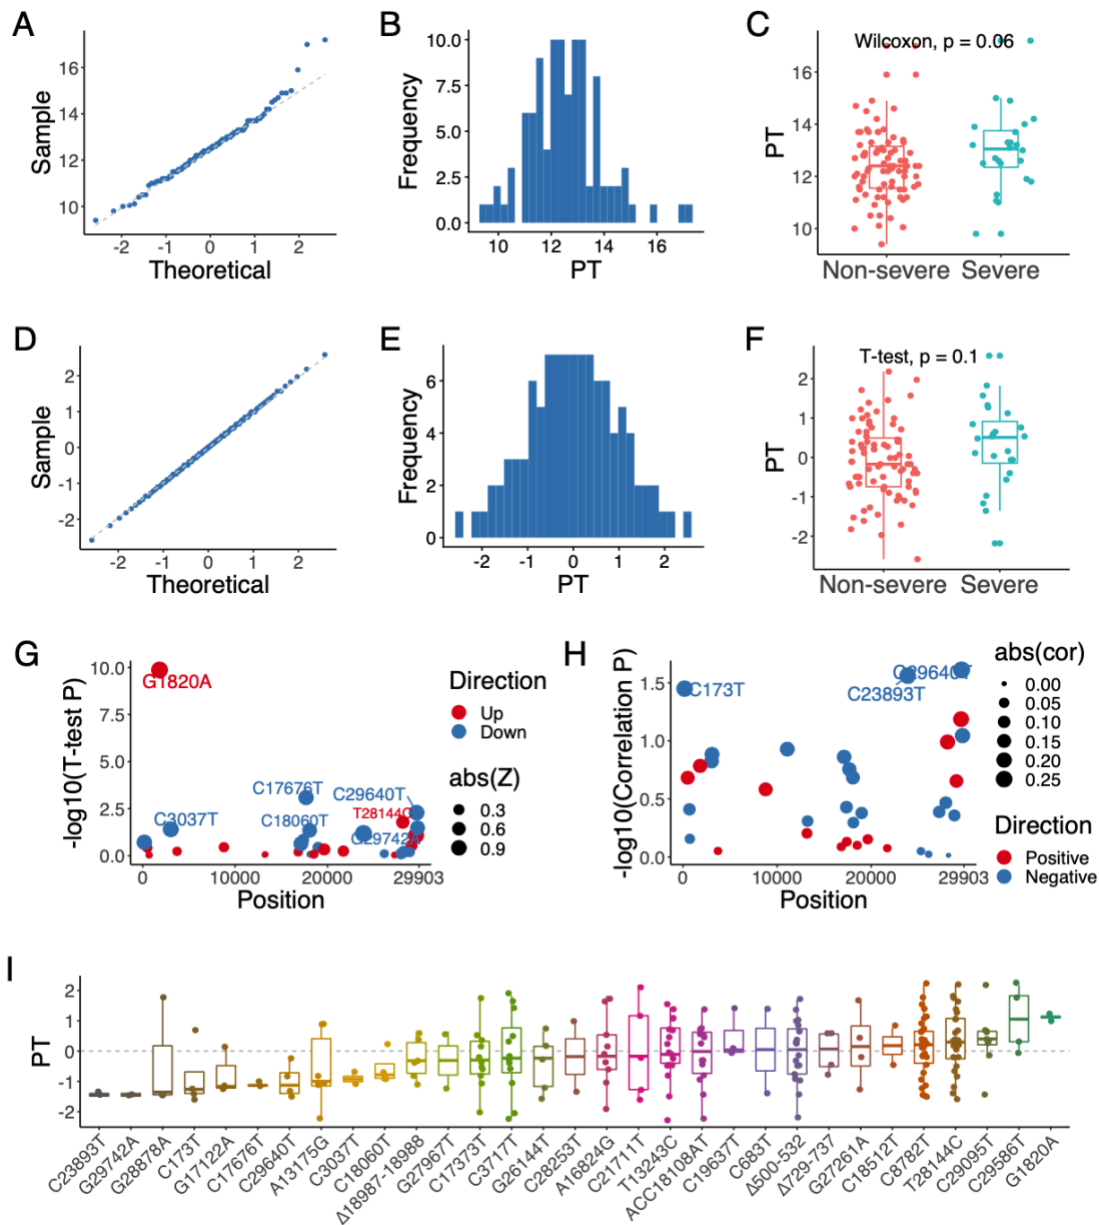

For PT (prothrombin time, sec), quantile-quantile (QQ) plot and distribution plot before (**A** and **B**) and after normalization (**D** and **E**) were shown. We compared PT in the non-severe and severe COVID-19 patients before (**C**,  $p = 0.06$ , Wilcoxon test) and after normalization (**F**,  $p = 0.10$ , T-test). We further performed association analyses between the 35 genetic variants and PT using T-test and Pearson correlation. (**G**) Variants G1820A, C3037T, C17676T, C18060T, C29640T, T28144C and G29742A pass P value cut-off of 0.05 in T test. Red indicates higher mean value in cases with the variants and blue indicates higher mean value in cases without the variant. The size of symbols indicates absolute Z score number. (**H**) Variants C173T, C23893T and C29640T have P value lower than 0.05 in Pearson correlation. Red and blue indicates positive and negative correlation, respectively. Size of the dots indicate absolute correlation coefficient. (**I**) After sorting Z score values of PT, cases with G1820A and C29586T tend to have the highest Z score, whereas cases with C23893T and G29742A have the lowest.

## 102. RBC (red blood cells count)

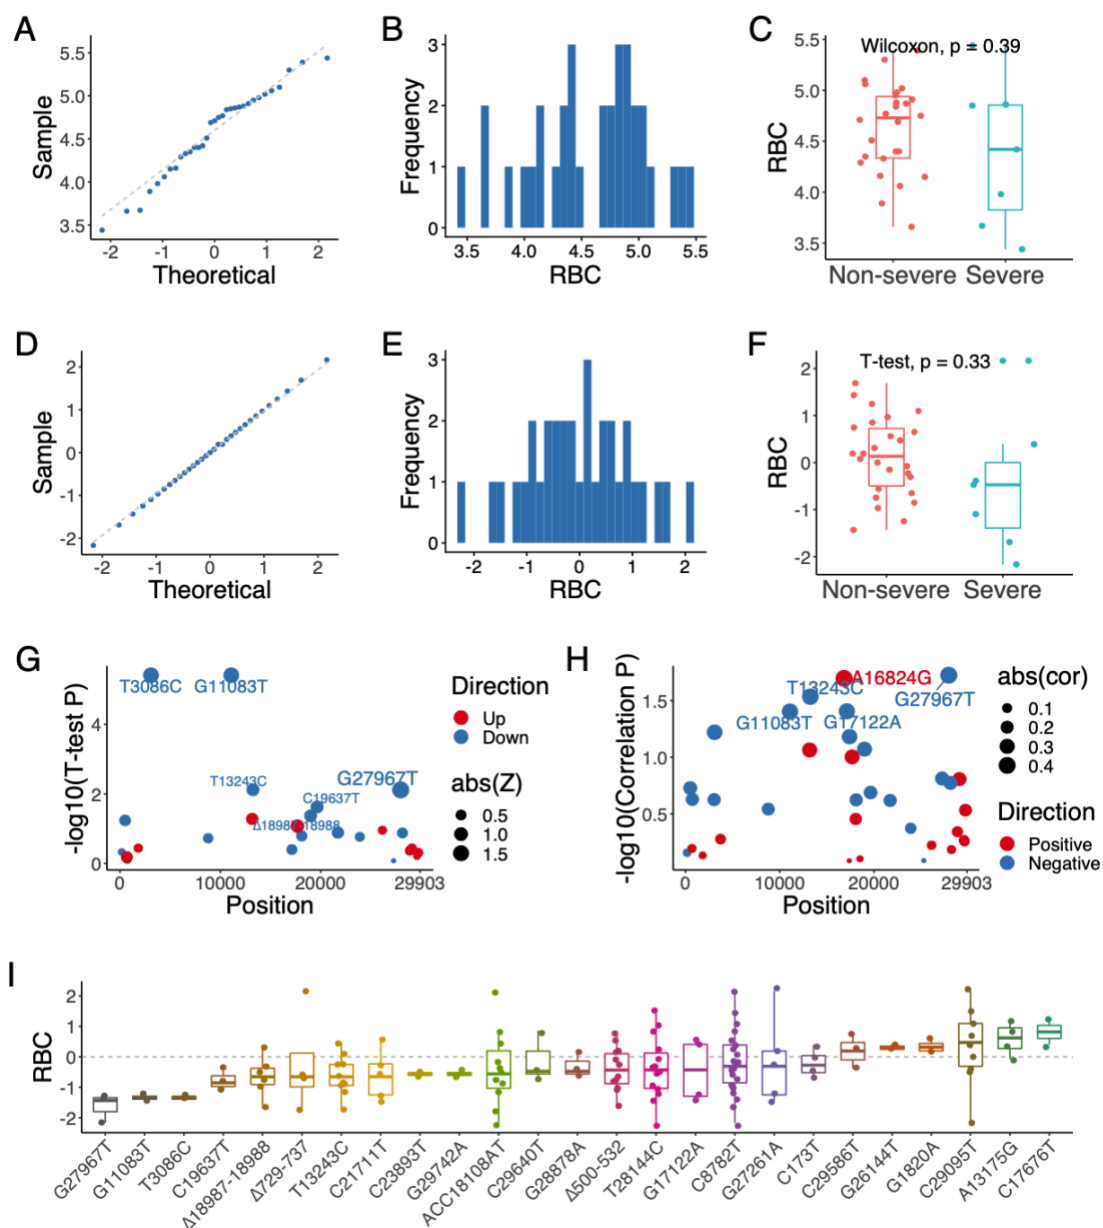

For RBC (red blood cells count,  $\times 10^9/\text{L}$ ), quantile-quantile (QQ) plot and distribution plot before (**A** and **B**) and after normalization (**D** and **E**) were shown. We compared RBC in the non-severe and severe COVID-19 patients before (**C**,  $p = 0.39$ , Wilcoxon test) and after normalization (**F**,  $p = 0.33$ , T-test). We further performed association analyses between the 35 genetic variants and RBC using T-test and Pearson correlation. (**G**) Variants T3086C, G11083T, T13243C, G27967T, C19637T and  $\Delta 18987-18988$  pass P value cut-off of 0.05 in T test. Red indicates higher mean value in cases with the variants and blue indicates higher mean value in cases without the variant. The size of symbols indicates absolute Z score number. (**H**) Variants A16824G, T13243C, G27967T, G11083T and G17122A have P value lower than 0.05 in Pearson correlation. Red and blue indicates positive and negative correlation, respectively. Size of the dots indicate absolute correlation coefficient. (**I**) After sorting Z score values of RBC, cases with C17676T and A13175G tend to have the highest Z score, whereas cases with

G27967T and G11083T have the lowest.

### 103. RBC Hgb (hemoglobin)

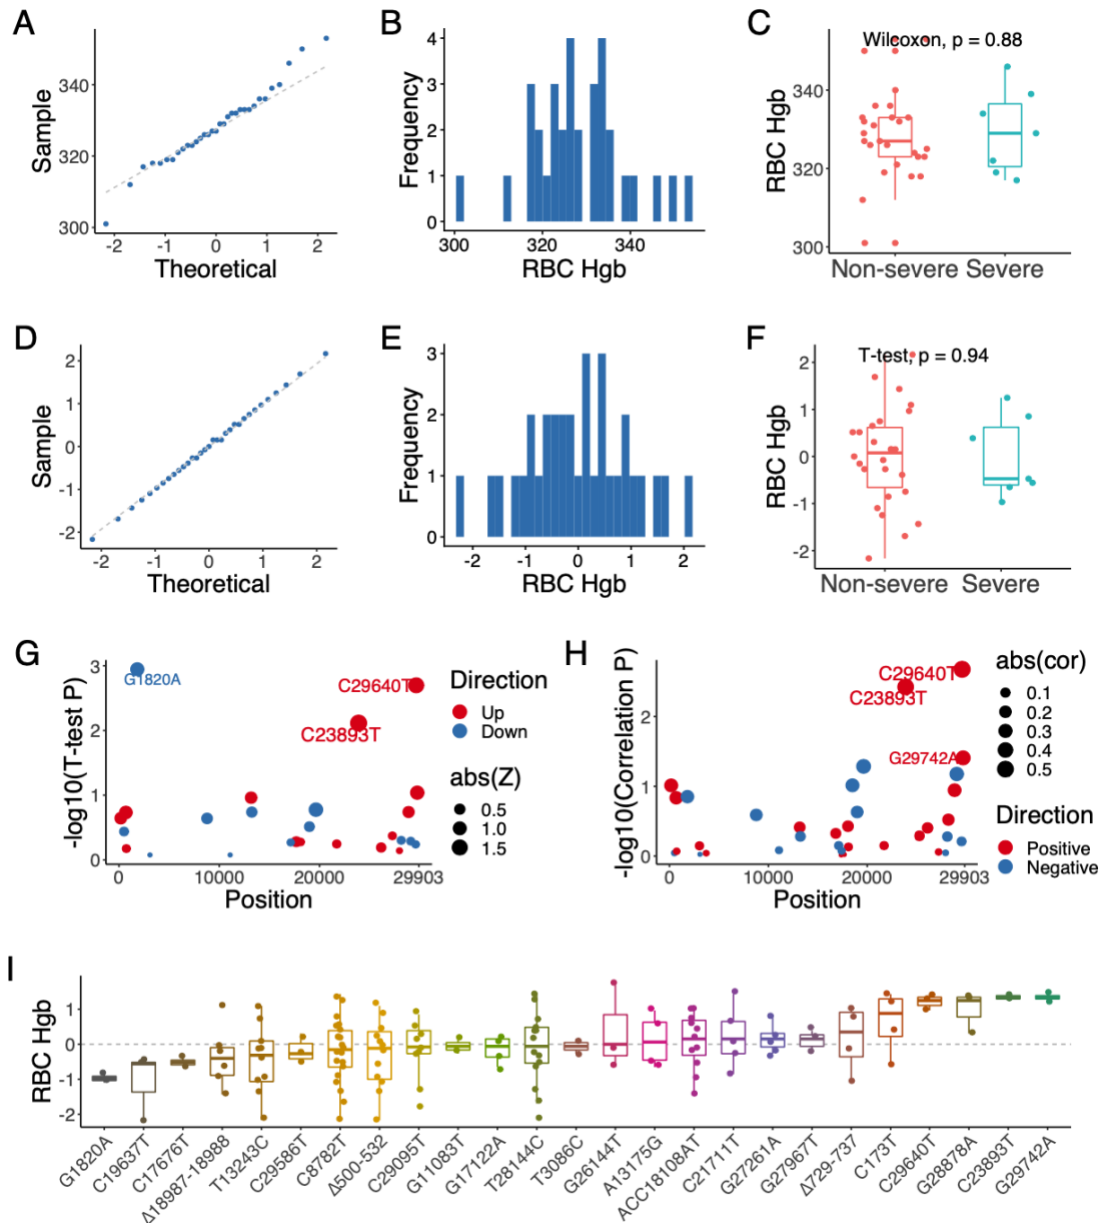

For RBC Hgb (hemoglobin, g/L), quantile-quantile (QQ) plot and distribution plot before (**A** and **B**) and after normalization (**D** and **E**) were shown. We compared RBC Hgb in the non-severe and severe COVID-19 patients before (**C**,  $p = 0.88$ , Wilcoxon test) and after normalization (**F**,  $p = 0.94$ , T-test). We further performed association analyses between the 35 genetic variants and RBC Hgb using T-test and Pearson correlation. (**G**) Variants G1820A, C29640T and C23893T pass P value cut-off of 0.05 in T test. Red indicates higher mean value in cases with the variants and blue indicates higher mean value in cases without the variant. The size of symbols indicates absolute Z score number. (**H**) Variants C29640T, C23893T and G29742A have P value lower than 0.05 in Pearson correlation. Red and blue indicates positive and negative correlation, respectively. Size of the dots indicate absolute correlation coefficient. (**I**) After sorting Z score values of RBC Hgb, cases with G29742A and C23893T tend to have

the highest Z score, whereas cases with G1820A and C19637T have the lowest.

## 104. RBC in urine

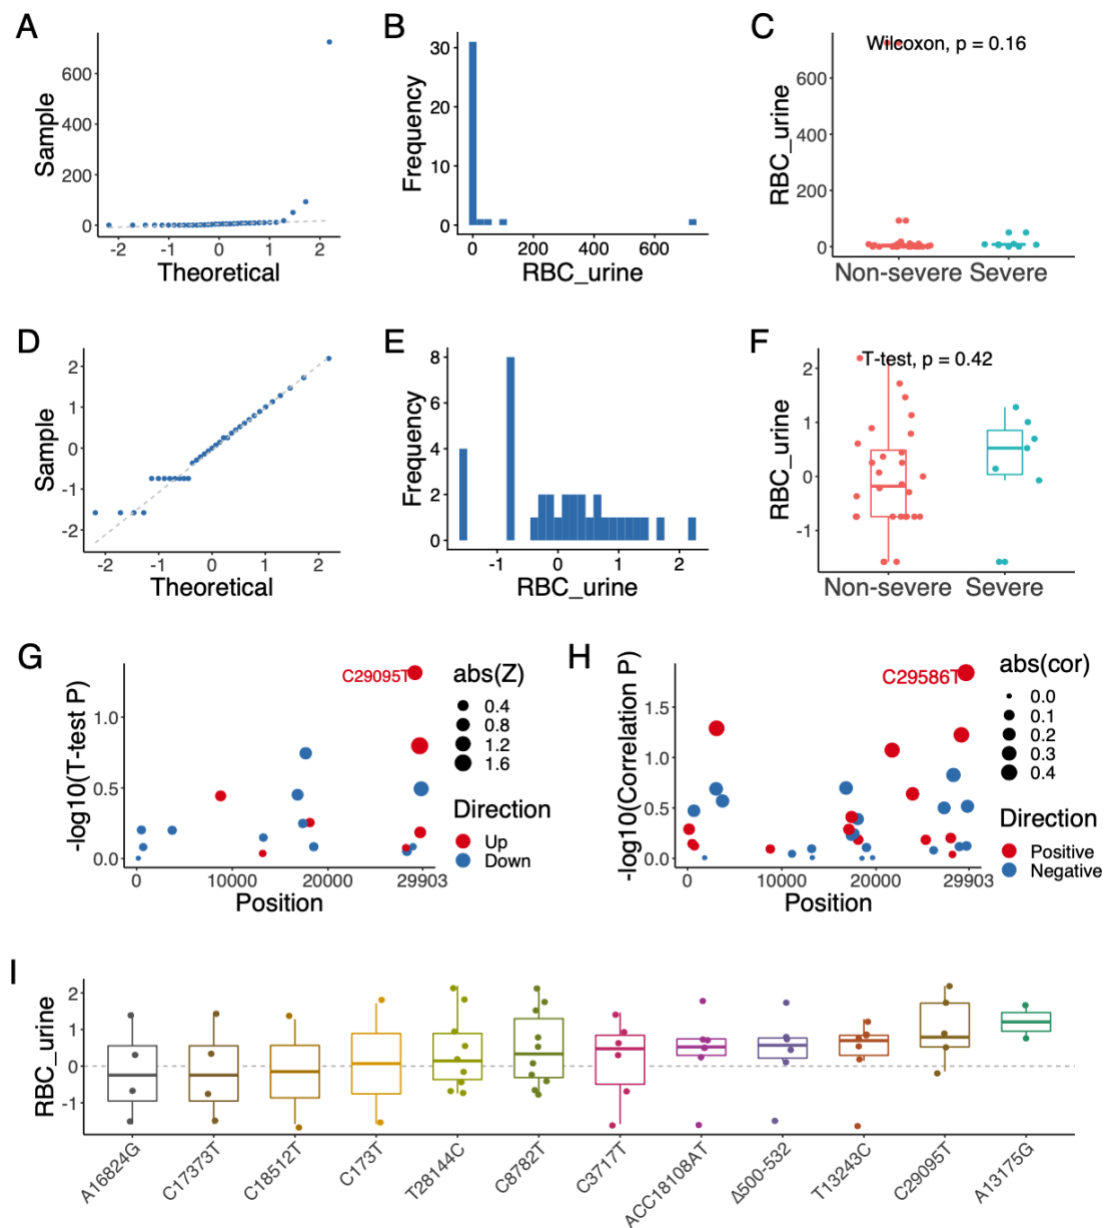

For RBC in urine (cell/μl), quantile-quantile (QQ) plot and distribution plot before (A and B) and after normalization (D and E) were shown. We compared RBC urine in the non-severe and severe COVID-19 patients before (C,  $p = 0.16$ , Wilcoxon test) and after normalization (F,  $p = 0.42$ , T-test). (G) Variant C29095T passes P value cut-off of 0.05 in T test. Red indicates higher mean value in cases with the variants and blue indicates higher mean value in cases without the variant. The size of symbols indicates absolute Z score number. (H) Variant C29586T has P value lower than 0.05 in Pearson correlation. Red and blue indicates positive and negative correlation, respectively. Size of the dots indicate absolute correlation coefficient. (I) After sorting Z score values of RBC urine, cases with A13175G and C29095T tend to have the highest Z score, whereas cases with A16824G and C17373T have the lowest.

## 105. RBC/HPF (red blood cells per high power field)

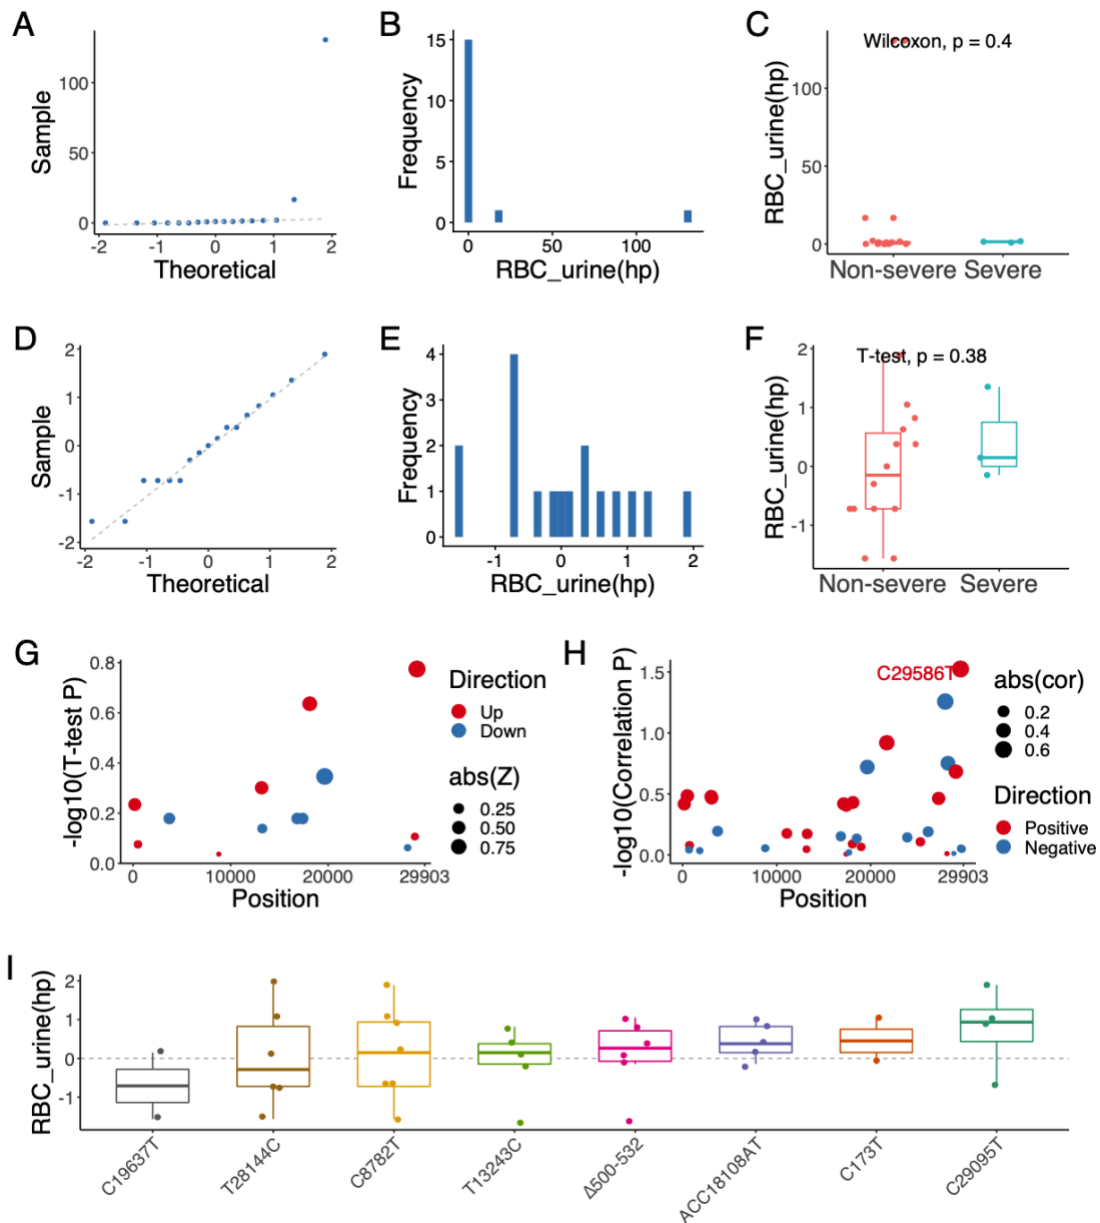

For RBC/HPF (red blood cells per high power field), quantile-quantile (QQ) plot and distribution plot before (**A** and **B**) and after normalization (**D** and **E**) were shown. We compared RBC/HPF in the non-severe and severe COVID-19 patients before (**C**,  $p = 0.40$ , Wilcoxon test) and after normalization (**F**,  $p = 0.38$ , T-test). We further performed association analyses between the 35 genetic variants and RBC/HPF using T-test and Pearson correlation. (**G**) No variant passes P value cut-off of 0.05 in T test. Red indicates higher mean value in cases with the variants and blue indicates higher mean value in cases without the variant. The size of symbols indicates absolute Z score number. (**H**) Variant C29586T in Pearson correlation was with P value below 0.05 (**H**). After sorting Z score values of RBC/HPF, cases with C29095T and C173T tend to have the highest Z score, whereas cases with C19637T and T28144C have the lowest.

## 106. RDW-CV (red blood cell distribution width coefficient of variation)

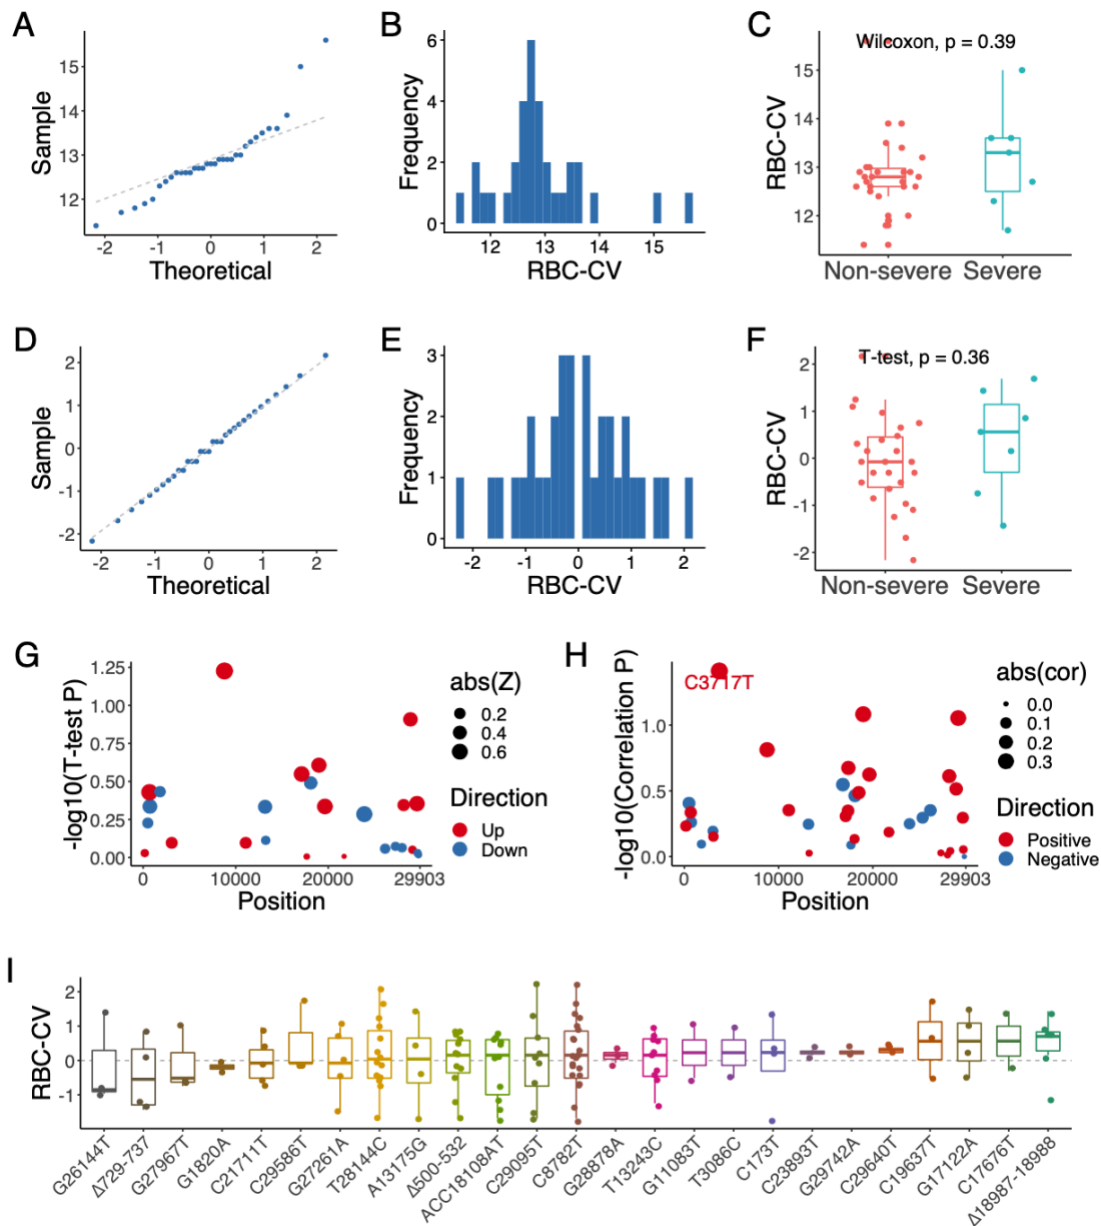

For RDW-CV (red blood cell distribution width, %), quantile-quantile (QQ) plot and distribution plot before (A and B) and after normalization (D and E) were shown. We compared RDW-CV in the non-severe and severe COVID-19 patients before (C,  $p = 0.39$ , Wilcoxon test) and after normalization (F,  $p = 0.36$ , T-test). We further performed association analyses between the 35 genetic variants and RDW-CV using T-test and Pearson correlation. (G) No variant passes P value cut-off of 0.05 in T test. Red indicates higher mean value in cases with the variants and blue indicates higher mean value in cases without the variant. The size of symbols indicates absolute Z score number. (H) Variant C3717T in Pearson correlation was with P value below 0.05 (H). After sorting Z score values of RDW-CV, cases with C17676T and  $\Delta$ 18987-18988 tend to have the highest Z score, whereas cases with G26144T and  $\Delta$ 729-737 have the

lowest.

## 107. RDW-SD (red blood cell distribution standard deviation)

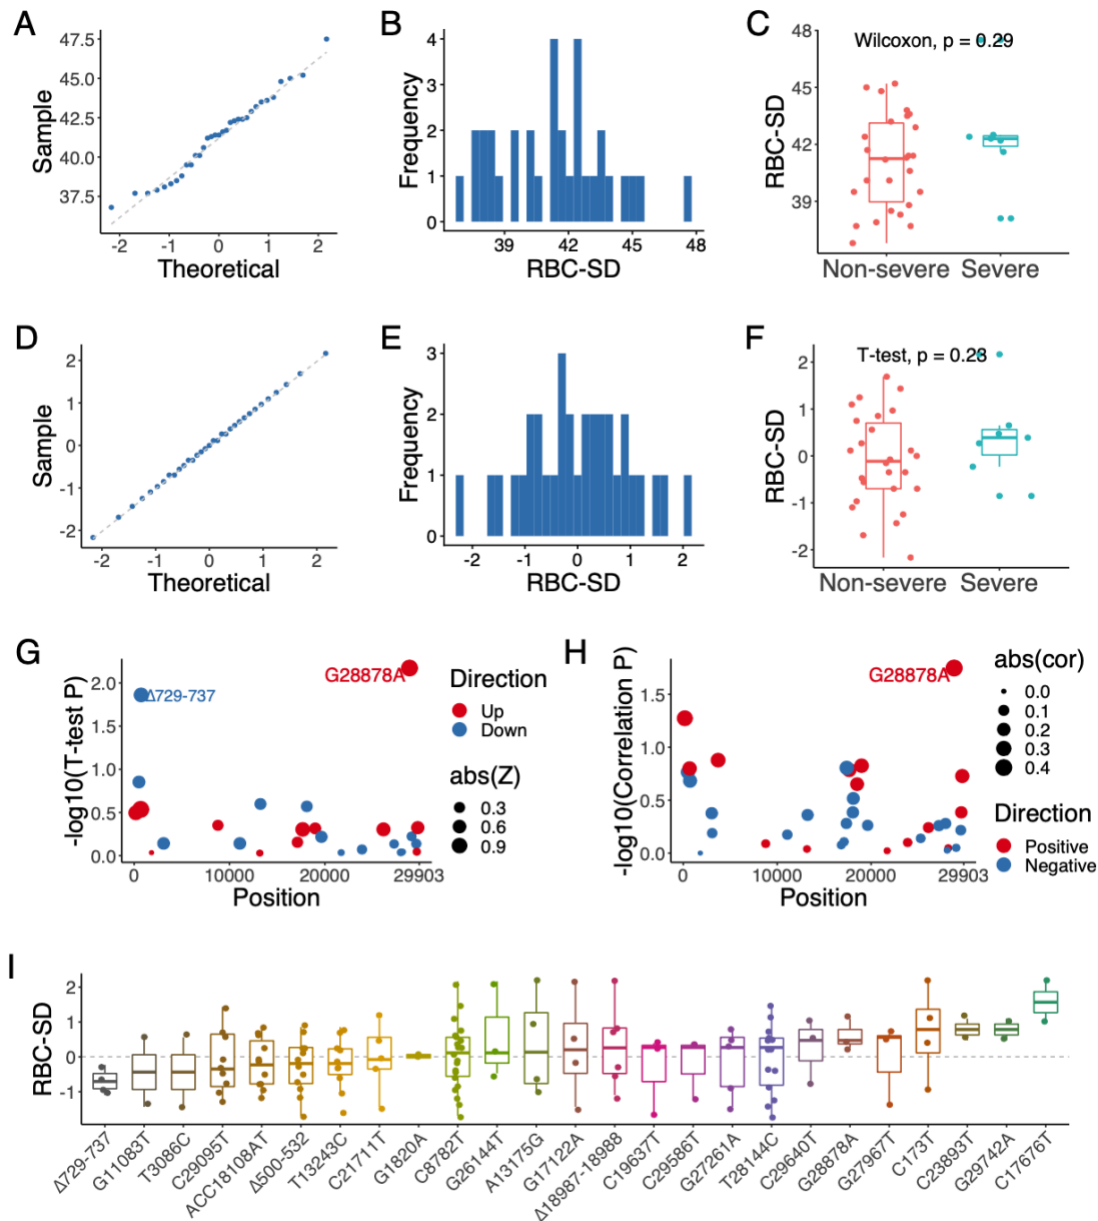

For RDW-SD (red blood cell distribution standard deviation, fl), quantile-quantile (QQ) plot and distribution plot before (**A** and **B**) and after normalization (**D** and **E**) were shown. We compared RDW-SD in the non-severe and severe COVID-19 patients before (**C**,  $p = 0.29$ , Wilcoxon test) and after normalization (**F**,  $p = 0.23$ , T-test). We further performed association analyses between the 35 genetic variants and RDW-SD using T-test and Pearson correlation. (**G**) Variants G28878A and  $\Delta 729-737$  pass P value cut-off of 0.05 in T test. Red indicates higher mean value in cases with the variants and blue indicates higher mean value in cases without the variant. The size of symbols indicates absolute Z score number. (**H**) Variant G28878A has P value lower than 0.05 in Pearson correlation. Red and blue indicates positive and negative correlation, respectively. Size of the dots indicate absolute correlation coefficient. (**I**) After sorting Z score values of RDW-SD, cases with C17676T and G29742A tend to have the highest

Z score, whereas cases with G11083T and  $\Delta$ 729-737 have the lowest.

### 108. SaO<sub>2</sub> (oxygen saturation)

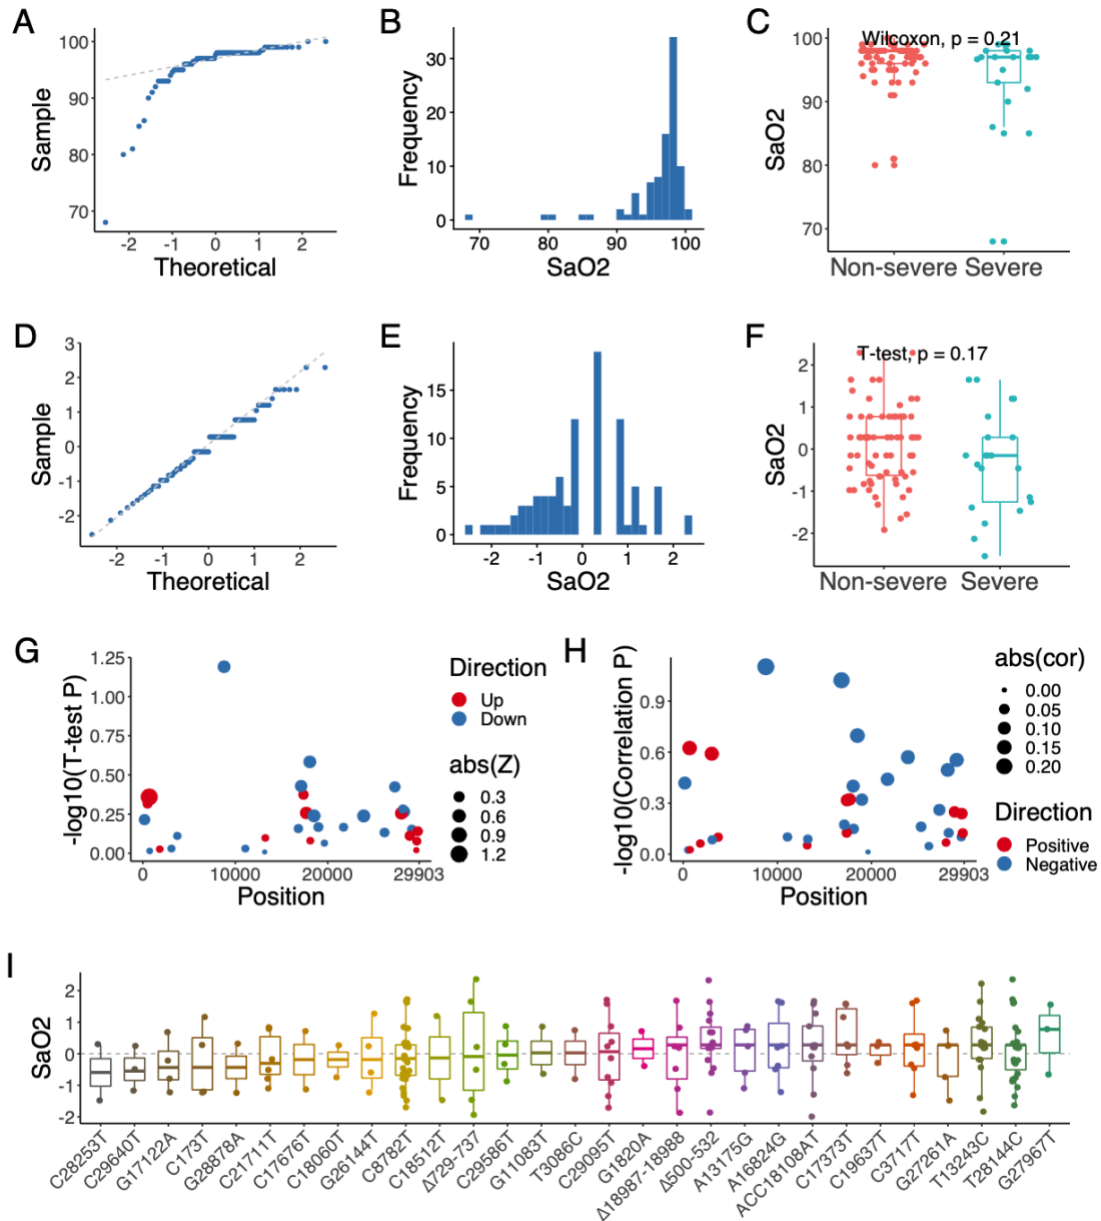

For SaO<sub>2</sub> (oxygen saturation, %), quantile-quantile (QQ) plot and distribution plot before (A and B) and after normalization (D and E) were shown. We compared SaO<sub>2</sub> in the non-severe and severe COVID-19 patients before (C,  $p = 0.21$ , Wilcoxon test) and after normalization (F,  $p = 0.17$ , T-test). We further performed association analyses between the 35 genetic variants and SaO<sub>2</sub> using T-test and Pearson correlation. (G) No variant in the T test (G) and in Pearson correlation was with P value below 0.05 (H). After sorting Z score values of SaO<sub>2</sub>, cases with T28144C and G27967T tend to have the highest Z score, whereas cases with C28253T and C29640T have the lowest.



## 109. Severe (severe probability)

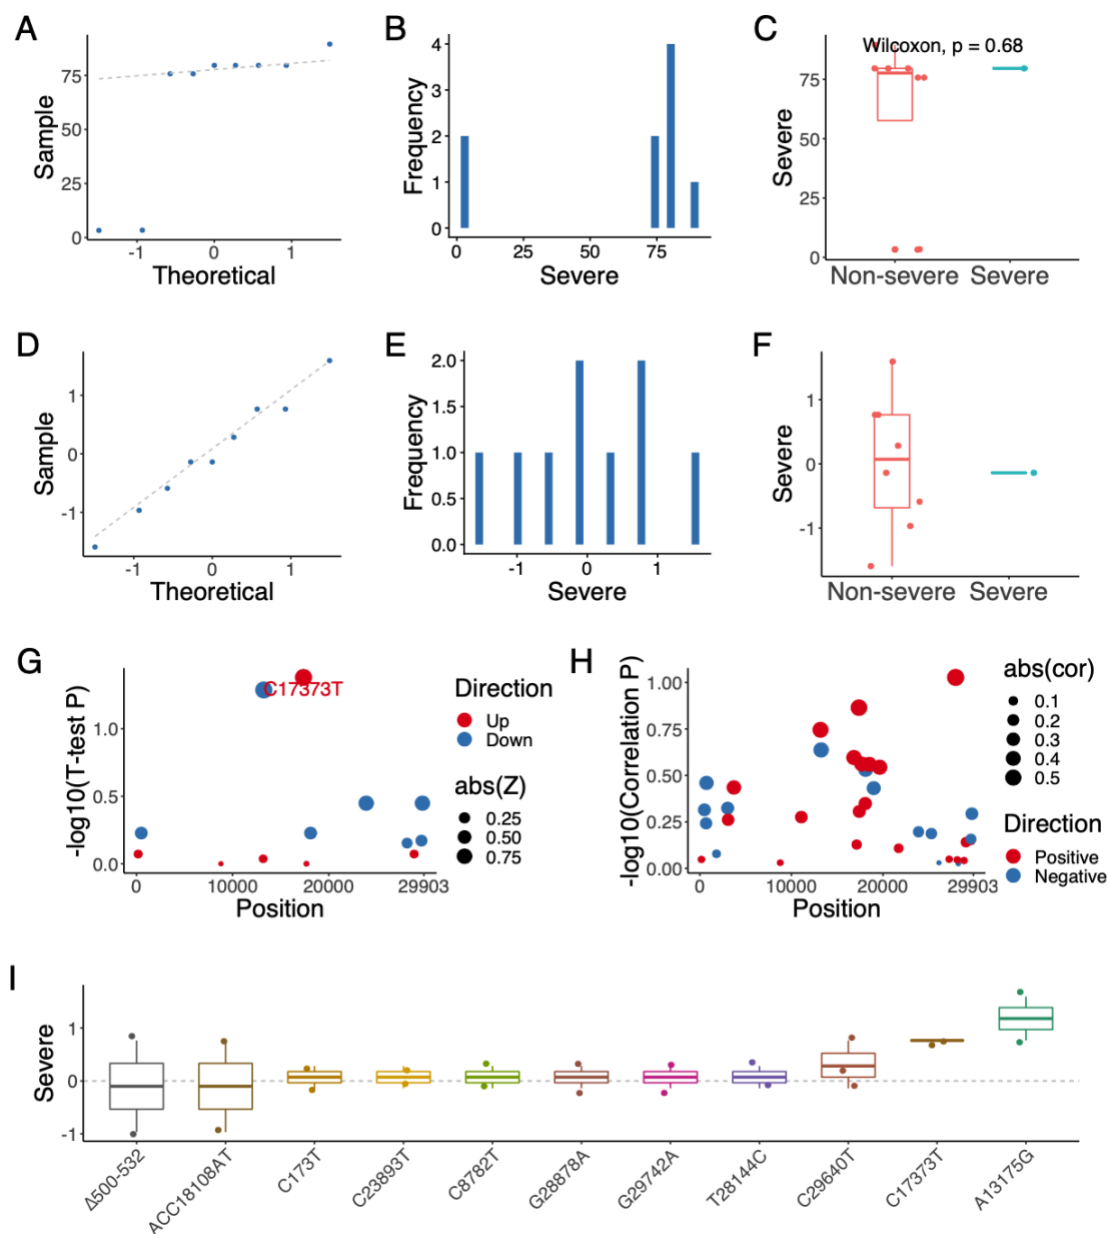

For severe (severe probability, %), quantile-quantile (QQ) plot and distribution plot before (**A** and **B**) and after normalization (**D** and **E**) were shown. We compared severe in the non-severe and severe COVID-19 patients before (**C**,  $p = 0.68$ , Wilcoxon test) and after normalization (**F**). We further performed association analyses between the 35 genetic variants and severe using T-test and Pearson correlation. (**G**) Variant C17373T passes P value cut-off of 0.05 in T test. Red indicates higher mean value in cases with the variants and blue indicates higher mean value in cases without the variant. The size of symbols indicates absolute Z score number. (**H**) No variant in Pearson correlation was has P value below 0.05. After sorting Z score values of severe, cases with A13175G and C17373T tend to have the highest Z score, whereas cases with  $\Delta 500-532$  and ACC18108AT have the lowest.

## 110. TBil (total bilirubin)

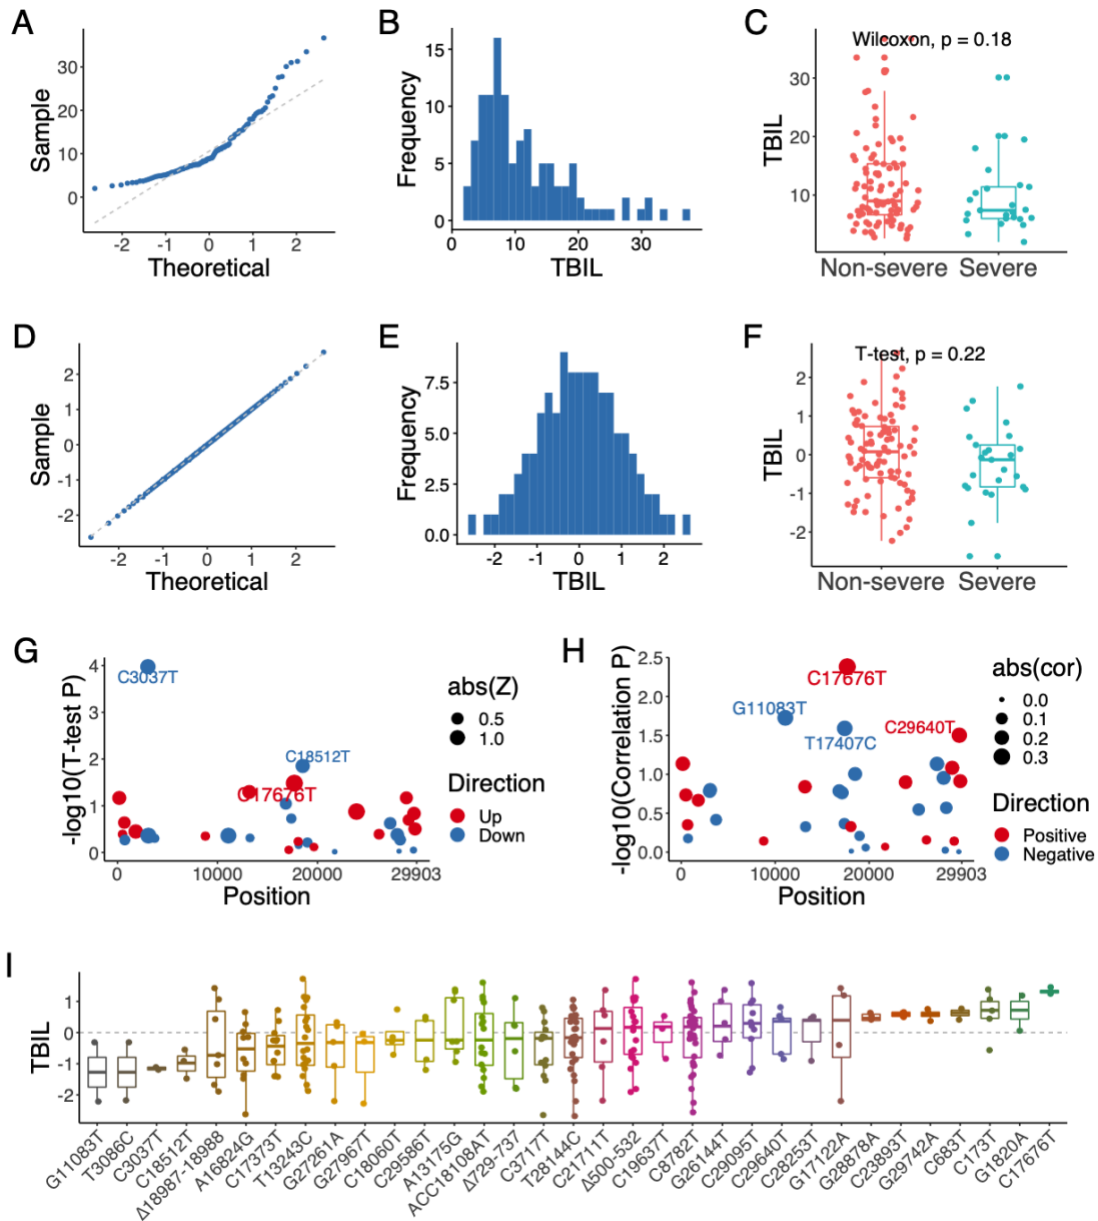

For TBil (total bilirubin,  $\mu\text{mol/L}$ ), quantile-quantile (QQ) plot and distribution plot before (**A** and **B**) and after normalization (**D** and **E**) were shown. We compared TBIL in the non-severe and severe COVID-19 patients before (**C**,  $p = 0.18$ , Wilcoxon test) and after normalization (**F**,  $p = 0.22$ , T-test). We further performed association analyses between the 35 genetic variants and TBil using T-test and Pearson correlation. (**G**) Variants C3037T, C17676T and C18512T pass P value cut-off of 0.05 in T test. Red indicates higher mean value in cases with the variants and blue indicates higher mean value in cases without the variant. The size of symbols indicates absolute Z score number. (**H**) Variants C17676T, T17407C, C29640T and G11083T have P value lower than 0.05 in Pearson correlation. Red and blue indicates positive and negative correlation, respectively. Size of the dots indicate absolute correlation coefficient. (**I**) After sorting Z score values of TBil, cases with C17676T and G1820A tend to have the highest Z score, whereas cases with G11083T and T3086C have the lowest.

## 111. SP (systolic pressure)

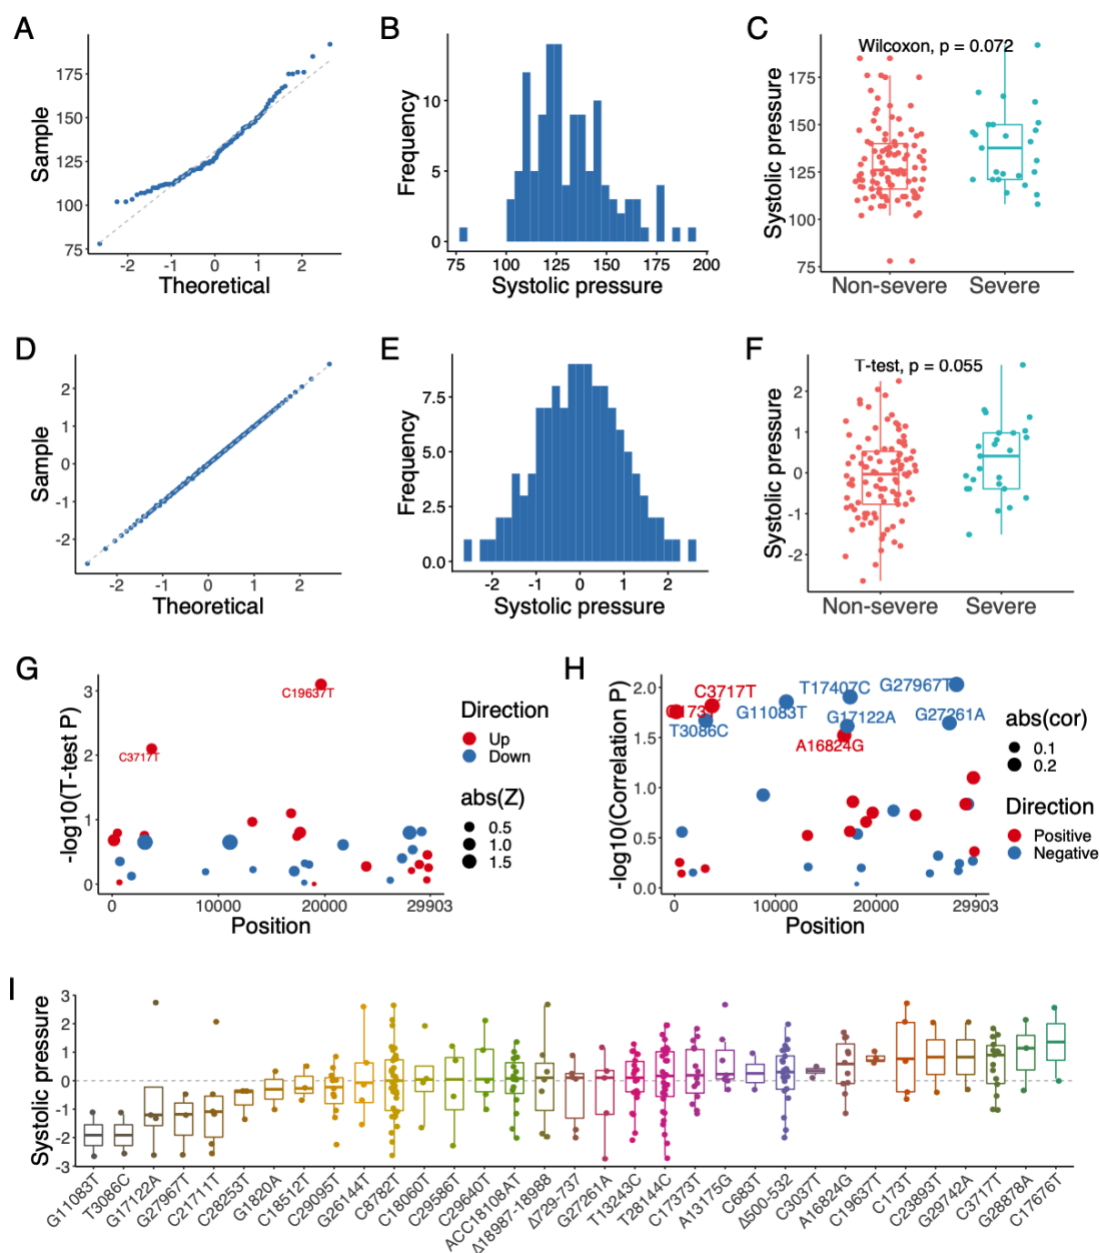

For SP (systolic pressure, mmHg), quantile-quantile (QQ) plot and distribution plot before (A and B) and after normalization (D and E) were shown. We compared SP in the non-severe and severe COVID-19 patients before (C,  $p = 7.2 \times 10^{-2}$ , Wilcoxon test) and after normalization (F,  $p = 5.5 \times 10^{-2}$ , T-test). (G) Variants C3717T and C19637T pass P value cut-off of 0.05 in T test. Red indicates higher mean value in cases with the variants and blue indicates higher mean value in cases without the variant. The size of symbols indicates absolute Z score number. (H) Variants C3717T, T17407C, G27967T, G11083T, G17122A, G27261A, T3086C and C173T have P value lower than 0.05 in Pearson correlation. Red and blue indicates positive and negative correlation, respectively. Size of the dots indicate absolute correlation coefficient. (I) After sorting Z score values of SP, cases with C17676T and G28878A tend to have the highest Z score, whereas cases with G11083T and T3086C have the lowest.

## 112. RF (respiratory frequency)

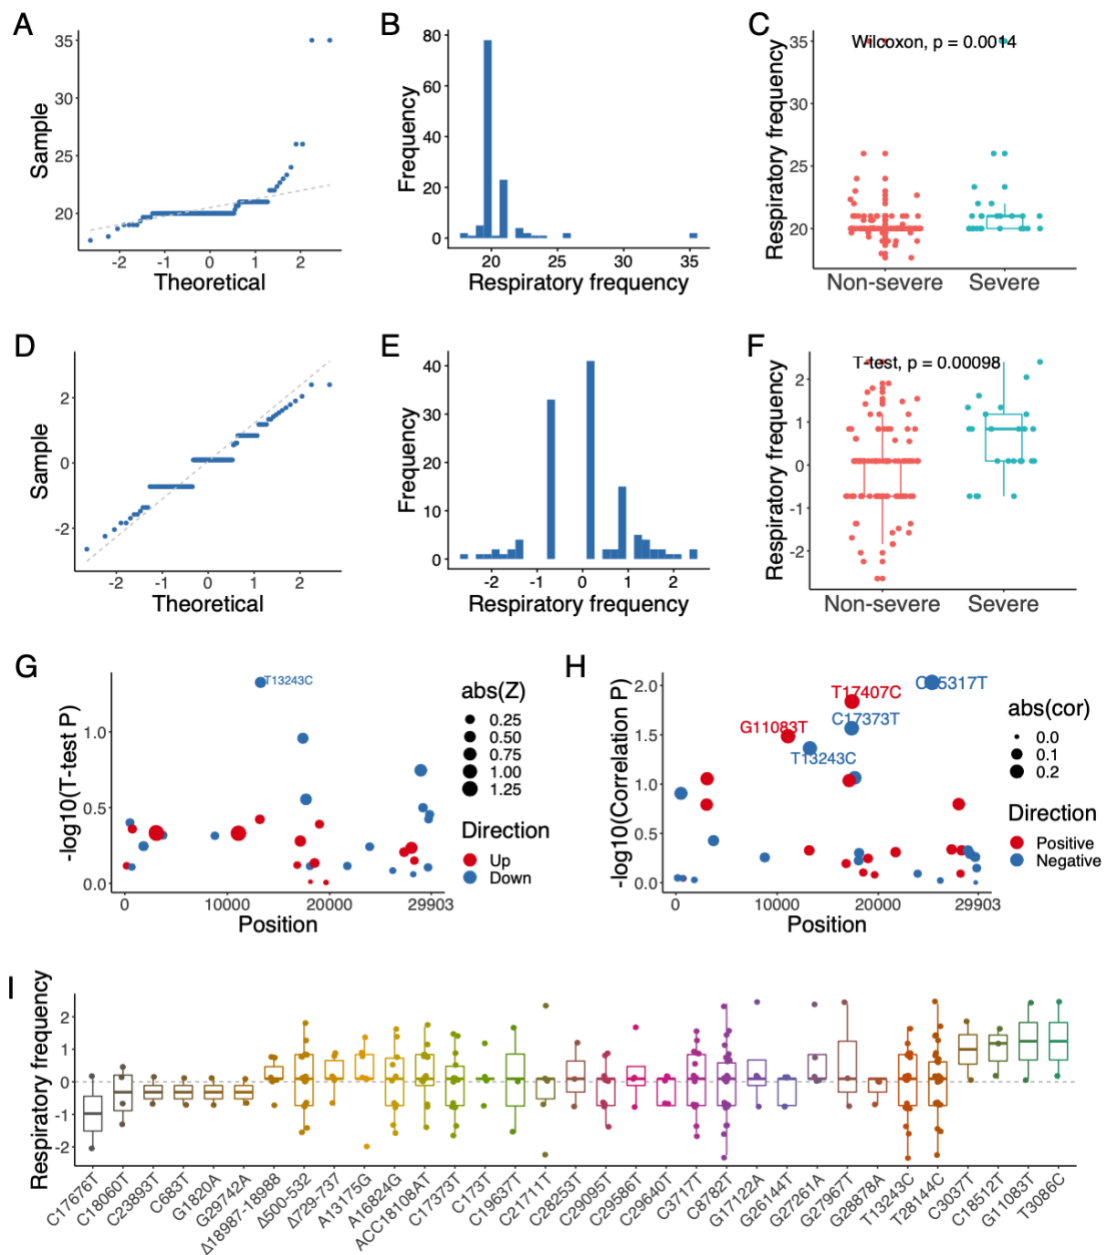

For RF (respiratory frequency, times/min), quantile-quantile (QQ) plot and distribution plot before (**A** and **B**) and after normalization (**D** and **E**) were shown. We compared RF in the non-severe and severe COVID-19 patients before (**C**,  $p = 1.4 \times 10^{-3}$ , Wilcoxon test) and after normalization (**F**,  $p = 9.8 \times 10^{-4}$ , T-test). (**G**) Variant T13243C passes P value cut-off of 0.05 in T test. Red indicates higher mean value in cases with the variants and blue indicates higher mean value in cases without the variant. The size of symbols indicates absolute Z score number. (**H**) Variants C17373T, G11083T, T13243C and T17407C have P value lower than 0.05 in Pearson correlation. Red and blue indicates positive and negative correlation, respectively. Size of the dots indicate absolute correlation coefficient. (**I**) After sorting Z score values of RF, cases with T3086C and G11083T tend to have the highest Z score, whereas cases with C17676T and C18060T have the lowest.

### 113. TG (triglycerides)

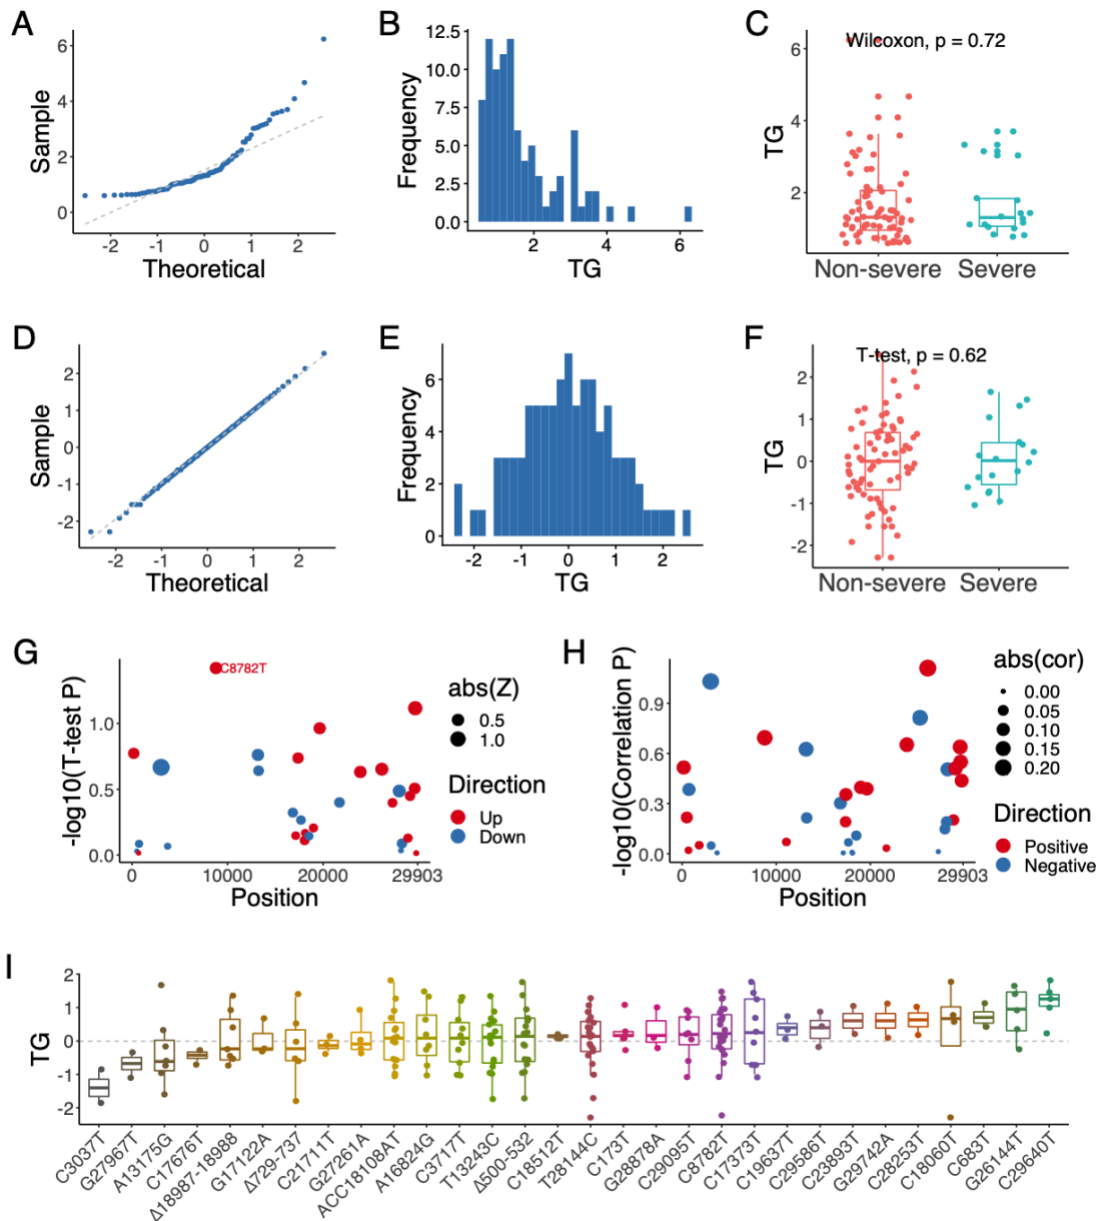

For TG (triglycerides, mmol/L), quantile-quantile (QQ) plot and distribution plot before (**A** and **B**) and after normalization (**D** and **E**) were shown. We compared TG in the non-severe and severe COVID-19 patients before (**C**,  $p = 0.72$ , Wilcoxon test) and after normalization (**F**,  $p = 0.62$ , T-test). We further performed association analyses between the 35 genetic variants and TG using T-test and Pearson correlation. (**G**) Variant C8782T passes P value cut-off of 0.05 in T test. Red indicates higher mean value in cases with the variants and blue indicates higher mean value in cases without the variant. The size of symbols indicates absolute Z score number. (**H**) No variant in Pearson correlation was has P value below 0.05. After sorting Z score values of TG, cases with C29640T and G26144T tend to have the highest Z score, whereas cases with C3037T and G27967T have the lowest.

## 114. TNF- $\alpha$ (tumor necrosis factor alpha)

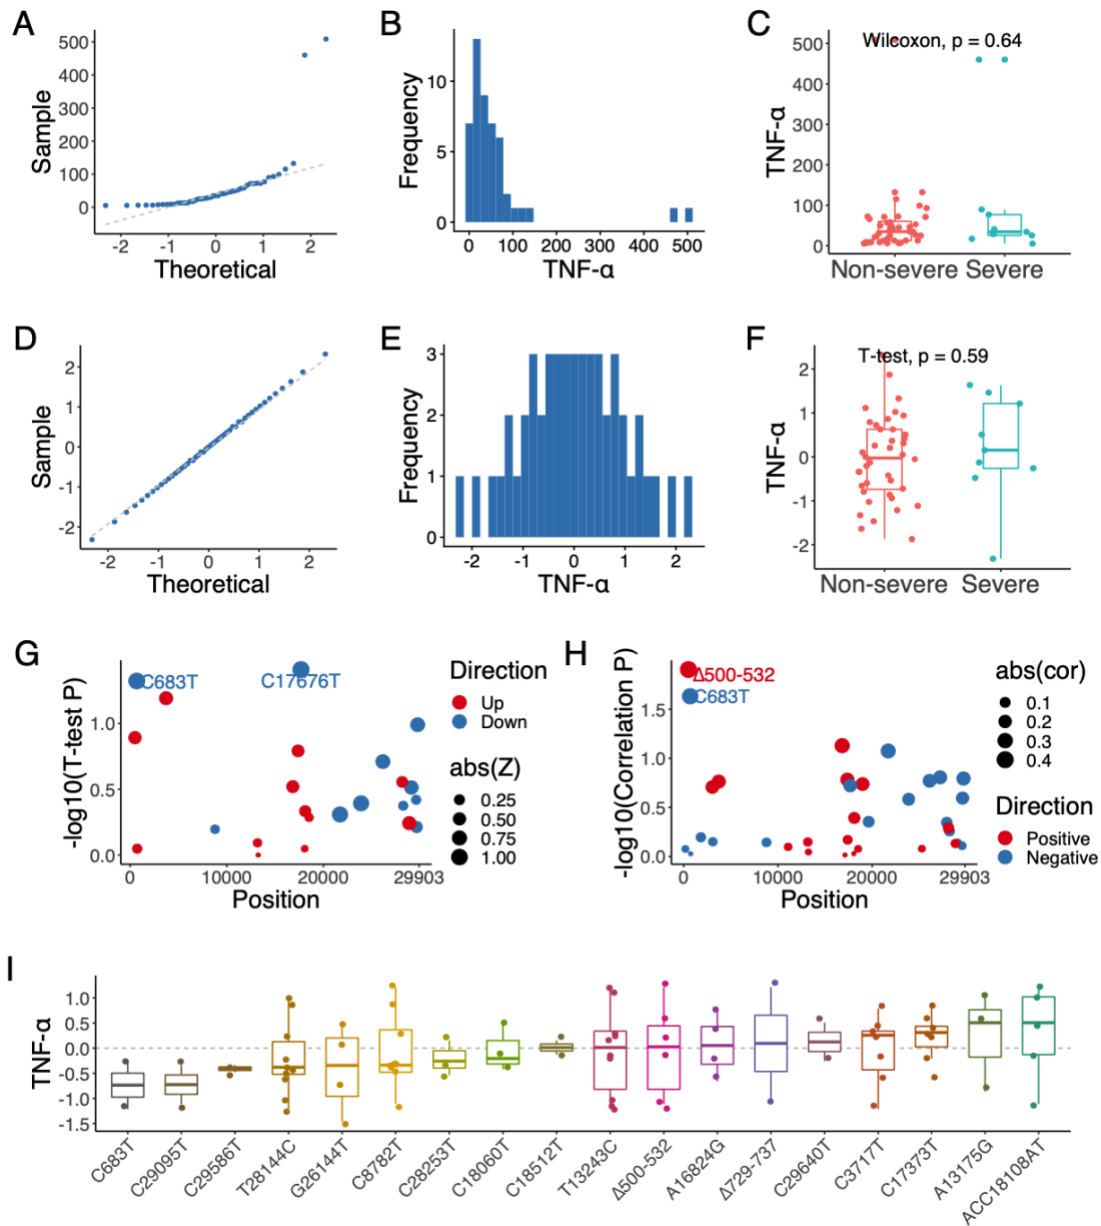

For TNF- $\alpha$  (tumor necrosis factor alpha pg/ml), quantile-quantile (QQ) plot and distribution plot before (**A** and **B**) and after normalization (**D** and **E**) were shown. We compared TNF- $\alpha$  in the non-severe and severe COVID-19 patients before (**C**,  $p = 0.64$ , Wilcoxon test) and after normalization (**F**,  $p = 0.59$ , T-test). We further performed association analyses between the 35 genetic variants and TNF- $\alpha$  using T-test and Pearson correlation. (**G**) Variants C683T and C17676T pass P value cut-off of 0.05 in T test. Red indicates higher mean value in cases with the variants and blue indicates higher mean value in cases without the variant. The size of symbols indicates absolute Z score number. (**H**) Variants  $\Delta 500-532$  and C683T have P value lower than 0.05 in Pearson correlation. Red and blue indicates positive and negative correlation, respectively. Size of the dots indicate absolute correlation coefficient. (**I**) After sorting Z score values of TNF- $\alpha$ , cases with ACC18108AT and A13175G tend to have the highest Z score, whereas cases with C683T and C29095T have the lowest.

## 115. TP (total protein)

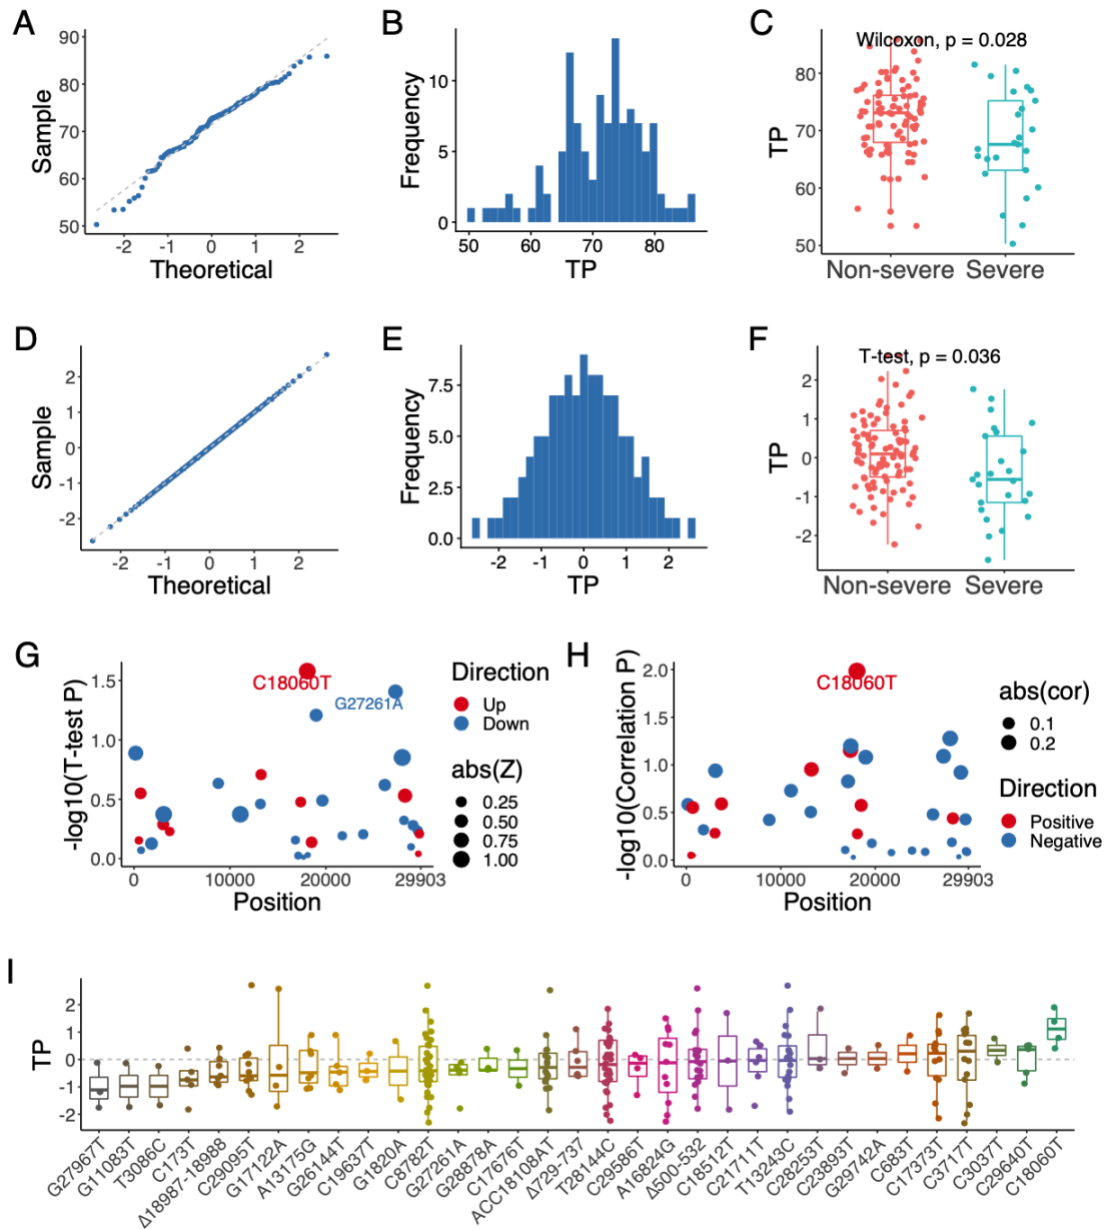

For TP (total protein, g/L), quantile-quantile (QQ) plot and distribution plot before (**A** and **B**) and after normalization (**D** and **E**) were shown. We compared TP in the non-severe and severe COVID-19 patients before (**C**,  $p = 2.8 \times 10^{-2}$ , Wilcoxon test) and after normalization (**F**,  $p = 3.6 \times 10^{-2}$ , T-test). We further performed association analyses between the 35 genetic variants and TP using T-test and Pearson correlation. (**G**) Variants C18060T and G27261A pass P value cut-off of 0.05 in T test. Red indicates higher mean P value in cases with the variants and blue indicates higher mean P value in cases without the variant. The size of symbols indicates absolute Z score number. (**H**) Variant C18060T has P value lower than 0.05 in Pearson correlation. Red and blue indicates positive and negative correlation, respectively. Size of the dots indicate absolute correlation coefficient. (**I**) After sorting Z score values of TP, cases with C18060T and C29640T tend to have the highest Z score, whereas cases with G27967T and G11083T have the lowest.

## 116. UA (uric acid)

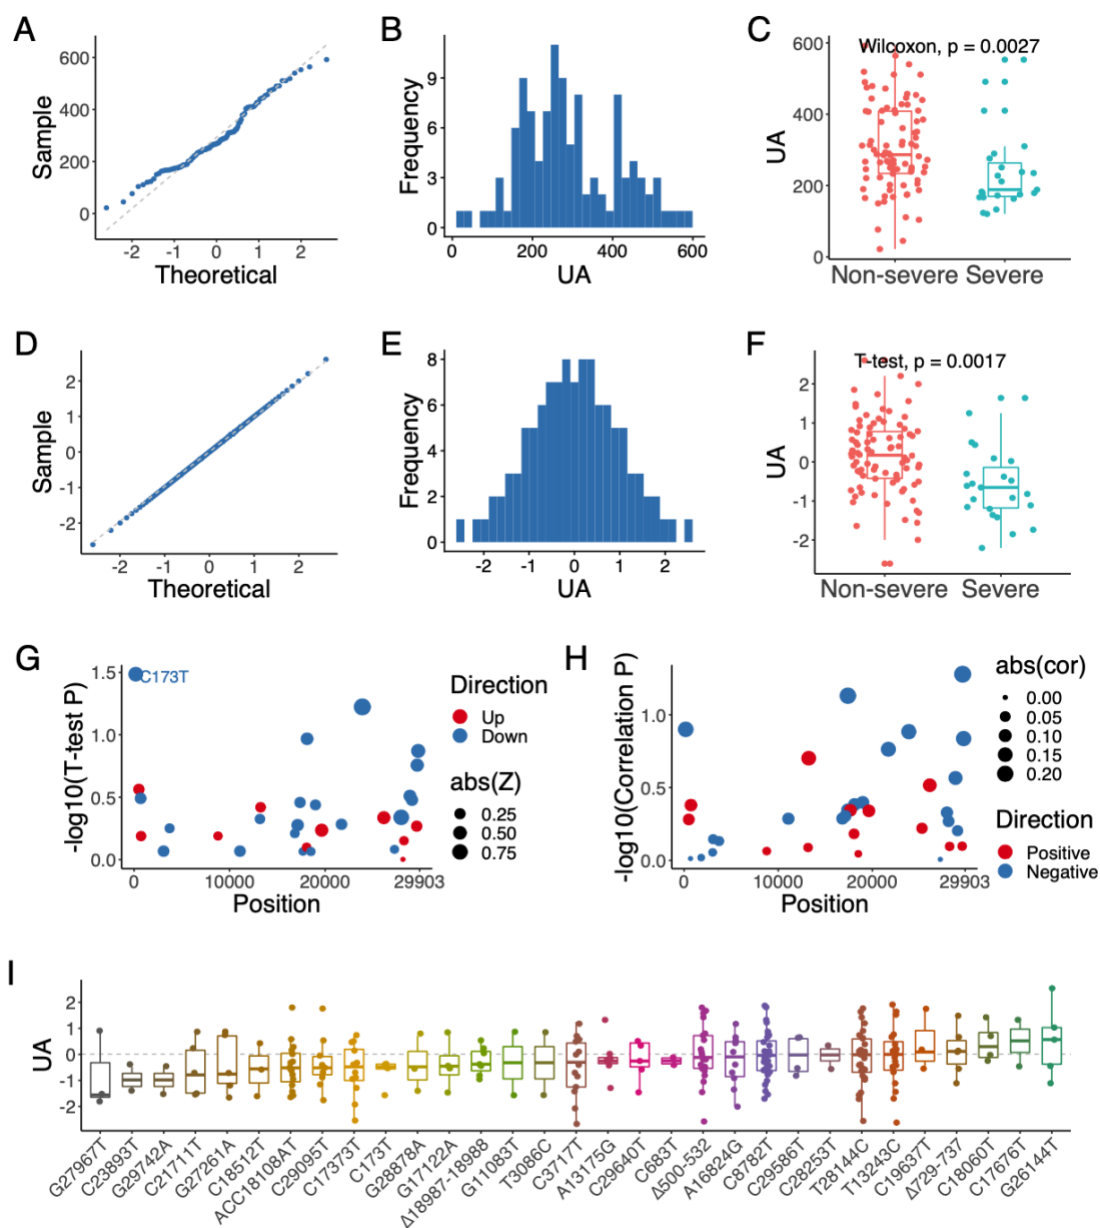

For UA (uric acid,  $\mu\text{mol/L}$ ), quantile-quantile (QQ) plot and distribution plot before (**A** and **B**) and after normalization (**D** and **E**) were shown. We compared UA in the non-severe and severe COVID-19 patients before (**C**,  $p = 2.7 \times 10^{-3}$ , Wilcoxon test) and after normalization (**F**,  $p = 1.7 \times 10^{-3}$ , T-test). We further performed association analyses between the 35 genetic variants and UA using T-test and Pearson correlation. (**G**) Variant C173T passes P value cut-off of 0.05 in T test. Red indicates higher mean value in cases with the variants and blue indicates higher mean value in cases without the variant. The size of symbols indicates absolute Z score number. (**H**) No variant in Pearson correlation was has P value below 0.05. After sorting Z score values of UA, cases with G26144T and C17676T tend to have the highest Z score, whereas cases with G27967T and T17407C have the lowest.



## 117. WBC (white blood cell count)

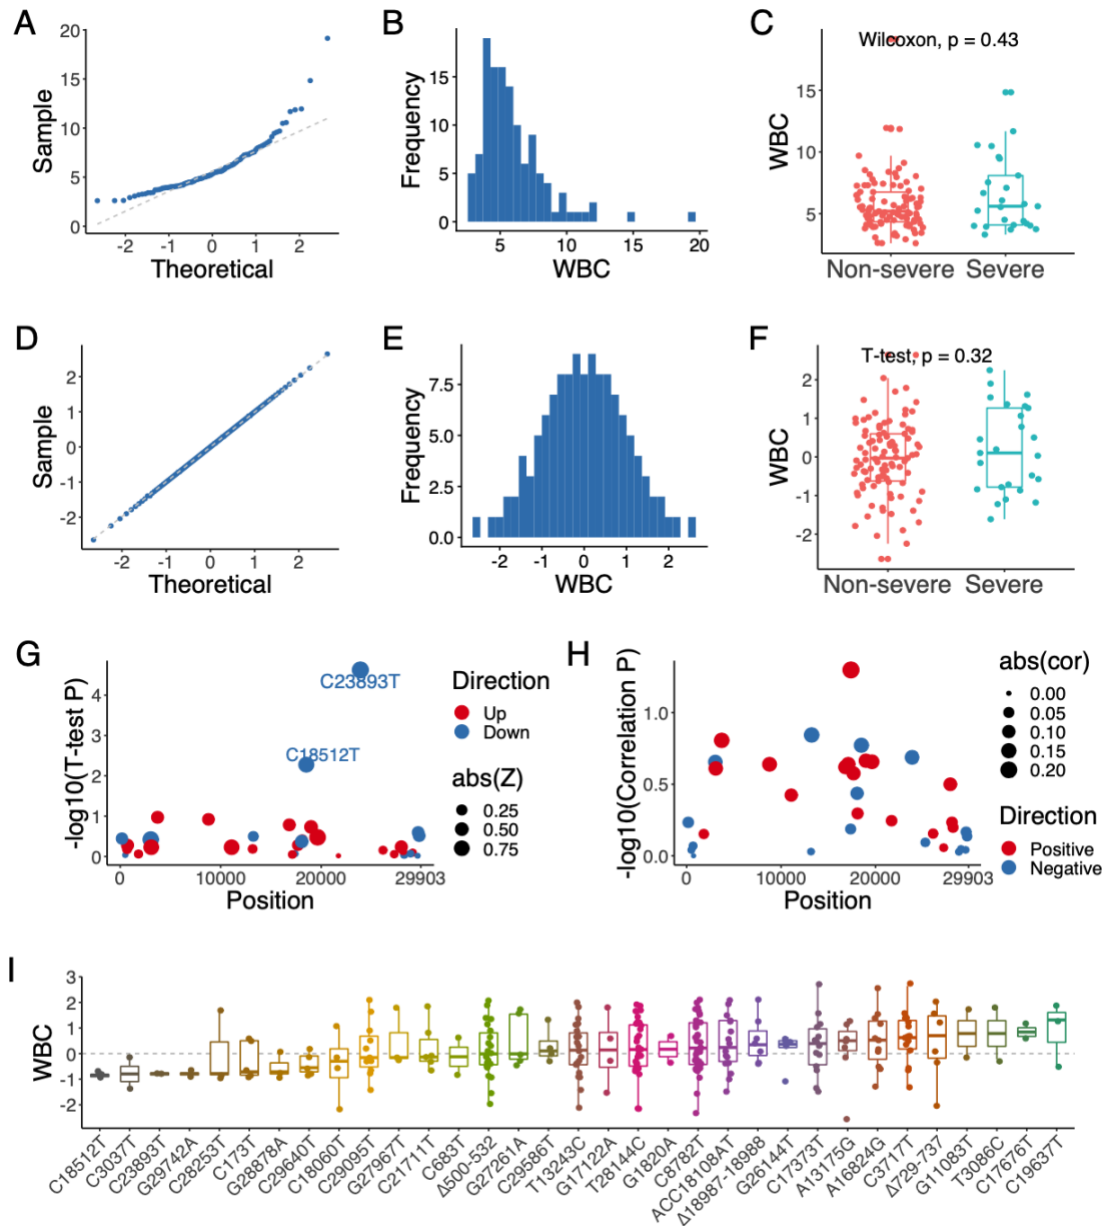

For WBC (white blood cell count,  $\times 10^9/\text{L}$ ), quantile-quantile (QQ) plot and distribution plot before (A and B) and after normalization (D and E) were shown. We compared WBC in the non-severe and severe COVID-19 patients before (C,  $p = 0.43$ , Wilcoxon test) and after normalization (F,  $p = 0.32$ , T-test). We further performed association analyses between the 35 genetic variants and WBC using T-test and Pearson correlation. (G) Variants C18512T and C23893T pass P value cut-off of 0.05 in T test. Red indicates higher mean value in cases with the variants and blue indicates higher mean value in cases without the variant. The size of symbols indicates absolute Z score number. (H) No variant has P value lower than 0.05 in Pearson correlation. (I) After sorting Z score values of WBC, cases with C19637T and C17676T tend to have the highest Z score, whereas cases with C18512T and C3037T have the lowest.
